# Supplementary material
Source: PubMed Central journal article supplement (PMC6131524)

# Supporting Information

for

## Interplay of Protecting Groups and Side Chain Conformation in Glycopyranosides. Modulation of the Influence of Remote Substituents on Glycosylation?

Suresh Dharuman,<sup>†</sup> Harsha Amarasekara,<sup>†</sup> and David Crich\*

Department of Chemistry, Wayne State University, 5101 Cass Avenue, Detroit, MI 48202, USA

[dcrich@chem.wayne.edu](mailto:dcrich@chem.wayne.edu)

<sup>†</sup> These authors contributed equally

**Table of Contents.**

| <b>Compounds</b>                                                                                                                                                       | <b>Spectra</b> |
|------------------------------------------------------------------------------------------------------------------------------------------------------------------------|----------------|
| Phenyl 2,3,6-tri- <i>O</i> -benzyl-1-thio-β-D-galactopyranoside ( <b>1</b> )                                                                                           | S5 – S6        |
| Phenyl (6 <i>S</i> )-[6- <sup>2</sup> <i>H</i> <sub>1</sub> ]-2,3,6-tri- <i>O</i> -benzyl-1-thio-β-D-galactopyranoside ( <b>6S-D-1</b> )                               | S7 – S8        |
| Phenyl 2,3,6-tri- <i>O</i> -benzyl-1-thio-β-D-glucopyranoside ( <b>2</b> )                                                                                             | S9 – S10       |
| Phenyl (6 <i>S</i> )-[6- <sup>2</sup> <i>H</i> <sub>1</sub> ]-2,3,6-tri- <i>O</i> -benzyl-1-thio-β-D-glucopyranoside ( <b>6S-D-2</b> )                                 | S11 – S12      |
| Ethyl 2,3,4-tri- <i>O</i> -benzyl-1-thio-β-D-glucopyranoside ( <b>3</b> )                                                                                              | S13 – S14      |
| Ethyl (6 <i>S</i> )-[6- <sup>2</sup> <i>H</i> <sub>1</sub> ]-2,3,4,6-tetra- <i>O</i> -acetyl-1-thio-β-D-glucopyranoside ( <b>6S-D-3</b> )                              | S15            |
| (6 <i>S</i> )-1,6-Anhydro-2,3,4-tri- <i>O</i> -acetyl-6-bromo-β-D-galactopyranose ( <b>5</b> )                                                                         | S16 – S17      |
| (6 <i>S</i> )-[6- <sup>2</sup> <i>H</i> <sub>1</sub> ]-1,6-Anhydro-2,3,4-tri- <i>O</i> -acetyl-β-D-galactopyranose ( <b>6</b> )                                        | S18 – S19      |
| Phenyl (6 <i>S</i> )-[6- <sup>2</sup> <i>H</i> <sub>1</sub> ]-2,3,4,6-tetra- <i>O</i> -acetyl-1-thio-β-D-galactopyranoside ( <b>8</b> )                                | S20 – S21      |
| Phenyl 2,3-di- <i>O</i> -benzyl-4,6- <i>O</i> -benzylidene-(6 <i>S</i> )-[6- <sup>2</sup> <i>H</i> <sub>1</sub> ]-1-thio-β-D-galactopyranoside ( <b>10</b> )           | S22 – S23      |
| Ethyl -(6 <i>S</i> )-[6- <sup>2</sup> <i>H</i> <sub>1</sub> ]-2,3,4,6-tetra- <i>O</i> -acetyl-1-thio-β-D-glucopyranoside ( <b>12</b> )                                 | S24 – S25      |
| Phenyl 4- <i>O</i> -acetyl-2,3,6-tri- <i>O</i> -benzyl-1-thio-β-D-galactopyranoside ( <b>13</b> )                                                                      | S26 – S27      |
| Phenyl 4- <i>O</i> -acetyl-(6 <i>S</i> )-[6- <sup>2</sup> <i>H</i> <sub>1</sub> ]-2,3,6-tri- <i>O</i> -benzyl-1-thio-β-D-galactopyranoside ( <b>6S-D-13</b> )          | S28 – S29      |
| Phenyl 4- <i>O</i> -pivaloyl-2,3,6-tri- <i>O</i> -benzyl-1-thio-β-D-galactopyranoside ( <b>14</b> )                                                                    | S30 – S32      |
| Phenyl 4- <i>O</i> -pivaloyl-(6 <i>S</i> )-[6- <sup>2</sup> <i>H</i> <sub>1</sub> ]-2,3,6-tri- <i>O</i> -benzyl-1-thio-β-D-galactopyranoside ( <b>6S-D-14</b> )        | S33 – S34      |
| Phenyl 2,3,6-tri- <i>O</i> -benzyl-4- <i>O</i> -trifluoroacetyl-1-thio-β-D-galactopyranoside ( <b>15</b> )                                                             | S35 – S39      |
| Phenyl 4- <i>O</i> -trifluoroacetyl-(6 <i>S</i> )-[6- <sup>2</sup> <i>H</i> <sub>1</sub> ]-2,3,6-tri- <i>O</i> -benzyl-1-thio-β-D-galactopyranoside ( <b>6S-D-15</b> ) | S40 – S41      |

|                                                                                                                                                                                 |           |
|---------------------------------------------------------------------------------------------------------------------------------------------------------------------------------|-----------|
| Phenyl 2,3,6-tri- <i>O</i> -benzyl-4- <i>O</i> -trichloroacetyl-1-thio-β-D-galactopyranoside<br><b>(16)</b>                                                                     | S42 – S44 |
| Phenyl 4- <i>O</i> -trichloroacetyl-(6 <i>S</i> )-[6- <sup>2</sup> <i>H</i> <sub>1</sub> ]-2,3,6-tri- <i>O</i> -benzyl-1-thio-β-D-galactopyranoside <b>(6S-D-16)</b>            | S45 – S46 |
| Phenyl 4- <i>O</i> -benzoyl-2,3,6-tri- <i>O</i> -benzyl-1-thio-β-D-galactopyranoside <b>(17)</b>                                                                                | S47 – S48 |
| Phenyl 4- <i>O</i> -benzoyl-(6 <i>S</i> )-[6- <sup>2</sup> <i>H</i> <sub>1</sub> ]-2,3,6-tri- <i>O</i> -benzyl-1-thio-β-D-galactopyranoside <b>(6S-D-17)</b>                    | S49 – S50 |
| Phenyl 4- <i>O</i> -( <i>p</i> -methylbenzoyl)-2,3,6-tri- <i>O</i> -benzyl-1-thio-β-D-galactopyranoside<br><b>(18)</b>                                                          | S51 – S53 |
| Phenyl 4- <i>O</i> -( <i>p</i> -methylbenzoyl-(6 <i>S</i> )-[6- <sup>2</sup> <i>H</i> <sub>1</sub> ]-2,3,6-tri- <i>O</i> -benzyl-1-thio-β-D-galactopyranoside <b>(6S-D-18)</b>  | S54 – S55 |
| Phenyl 4- <i>O</i> -( <i>p</i> -methoxybenzoyl)-2,3,6-tri- <i>O</i> -benzyl-1-thio-β-D-galactopyranoside <b>(19)</b>                                                            | S56 – S57 |
| Phenyl 4- <i>O</i> -( <i>p</i> -methoxybenzoyl-(6 <i>S</i> )-[6- <sup>2</sup> <i>H</i> <sub>1</sub> ]-2,3,6-tri- <i>O</i> -benzyl-1-thio-β-D-galactopyranoside <b>(6S-D-19)</b> | S58 – S59 |
| Phenyl 4- <i>O</i> -( <i>p</i> -nitrobenzoyl)-2,3,6-tri- <i>O</i> -benzyl-1-thio-β-D-galactopyranoside<br><b>(20)</b>                                                           | S60 – S62 |
| Phenyl 4- <i>O</i> -( <i>p</i> -nitrobenzoyl)-(6 <i>S</i> )-[6- <sup>2</sup> <i>H</i> <sub>1</sub> ]-2,3,6-tri- <i>O</i> -benzyl-1-thio-β-D-galactopyranoside <b>(6S-D-20)</b>  | S63 – S64 |
| Phenyl 2,3,4,6-tetra- <i>O</i> -benzyl-1-thio-β-D-galactopyranoside <b>(21)</b>                                                                                                 | S65 – S66 |
| Phenyl (6 <i>S</i> )-[6- <sup>2</sup> <i>H</i> <sub>1</sub> ]-2,3,4,6-tetra- <i>O</i> -benzyl-1-thio-β-D-galactopyranoside <b>(6S-D-21)</b>                                     | S67 – S68 |
| Phenyl 2,3,6-tri- <i>O</i> -benzyl-4- <i>O</i> -(1',1',1'-trifluoroethyl)-1-thio-β-D-galactopyranoside <b>(22)</b>                                                              | S69 – S72 |
| Phenyl (6 <i>S</i> )-[6- <sup>2</sup> <i>H</i> <sub>1</sub> ]-2,3,6-tri- <i>O</i> -benzyl-4- <i>O</i> -(1',1',1'-trifluoroethyl)-1-thio-β-D-galactopyranoside <b>(6S-D-22)</b>  | S73 – S74 |
| Phenyl 4- <i>O</i> -acetyl-2,3,6-tri- <i>O</i> -benzyl-1-thio-β-D-glucopyranoside <b>(23)</b>                                                                                   | S75 – S76 |
| Phenyl 2,3,6-tri- <i>O</i> -benzyl-4- <i>O</i> -trifluoroacetyl-1-thio-β-D-glucopyranoside <b>(24)</b>                                                                          | S77 – S80 |
| Phenyl 4- <i>O</i> -benzoyl-2,3,6-tri- <i>O</i> -benzyl-1-thio-β-D-glucopyranoside <b>(25)</b>                                                                                  | S81 – S82 |

|                                                                                                                                                                                  |             |
|----------------------------------------------------------------------------------------------------------------------------------------------------------------------------------|-------------|
| Phenyl 4- <i>O</i> -benzoyl-(6 <i>S</i> )-[6- <sup>2</sup> <i>H</i> <sub>1</sub> ]-2,3,6-tri- <i>O</i> -benzyl-1-thio-β-D-glucopyranoside<br>( <b>6S-D-25</b> )                  | S83 – S84   |
| Spectrum of Phenyl 4- <i>O</i> -benzenesulfonyl-2,3,6-tri- <i>O</i> -benzyl-1-thio-β-D-glucopyranoside ( <b>26</b> )                                                             | S85 – S87   |
| Phenyl 4- <i>O</i> -benzenesulfonyl-(6 <i>S</i> )-[6- <sup>2</sup> <i>H</i> <sub>1</sub> ]-2,3,6-tri- <i>O</i> -benzyl-1-thio-β-D-glucopyranoside ( <b>6S-D-26</b> )             | S88 – S89   |
| Phenyl 2,3,4,6-tetra- <i>O</i> -benzyl-1-thio-β-D-glucopyranoside ( <b>27</b> )                                                                                                  | S90 – S91   |
| Phenyl (6 <i>S</i> )-[6- <sup>2</sup> <i>H</i> <sub>1</sub> ]-2,3,4,6-tetra- <i>O</i> -benzyl-1-thio-β-D-glucopyranoside ( <b>6S-D-27</b> )                                      | S92 – S93   |
| Ethyl 6- <i>O</i> -acetyl-2,3,4-tri- <i>O</i> -benzyl-1-thio-β-D-glucopyranoside ( <b>28</b> )                                                                                   | S94 – S96   |
| Ethyl 2,3,4-tri- <i>O</i> -benzyl-6- <i>O</i> -pivaloyl-1-thio-β-D-glucopyranoside ( <b>29</b> )                                                                                 | S97 – S99   |
| Ethyl 2,3,4-tri- <i>O</i> -benzyl-6- <i>O</i> -trifluoroacetyl-1-thio-β-D-glucopyranoside ( <b>30</b> )                                                                          | S100 – S103 |
| Ethyl 6- <i>O</i> -benzoyl-2,3,4-tri- <i>O</i> -benzyl-1-thio-β-D-glucopyranoside ( <b>31</b> )                                                                                  | S104 – S105 |
| Ethyl (6 <i>S</i> )-[6- <sup>2</sup> <i>H</i> <sub>1</sub> ]-6- <i>O</i> -benzoyl-2,3,4-tri- <i>O</i> -benzyl-1-thio-β-D-glucopyranoside<br>( <b>6S-D-31</b> )                   | S106 – S107 |
| Spectrum of Ethyl 6- <i>O</i> - <i>p</i> -methylbenzoyl-2,3,4-tri- <i>O</i> -benzyl-1-thio-β-D-glucopyranoside ( <b>32</b> )                                                     | S108 – S111 |
| Ethyl (6 <i>S</i> )-[6- <sup>2</sup> <i>H</i> <sub>1</sub> ]-6- <i>O</i> - <i>p</i> -methylbenzoyl-2,3,4-tri- <i>O</i> -benzyl-1-thio-β-D-glucopyranoside ( <b>6S-D-32</b> )     | S112 – S113 |
| Ethyl 6- <i>O</i> - <i>p</i> -methoxybenzoyl-2,3,4-tri- <i>O</i> -benzyl-1-thio-β-D-glucopyranoside<br>( <b>33</b> )                                                             | S114 – S117 |
| Ethyl (6 <i>S</i> )-[6- <sup>2</sup> <i>H</i> <sub>1</sub> ]-6- <i>O</i> - <i>p</i> -methoxybenzoyl-2,3,4-tri- <i>O</i> -benzyl-1-thio-β-D-glucopyranoside ( <b>6S-D-33</b> )    | S118 – S119 |
| Ethyl 6- <i>O</i> - <i>p</i> -nitrobenzoyl-2,3,4-tri- <i>O</i> -benzyl-1-thio-β-D-glucopyranoside ( <b>34</b> )                                                                  | S120 – S122 |
| Ethyl (6 <i>S</i> )-[6- <sup>2</sup> <i>H</i> <sub>1</sub> ]-6- <i>O</i> - <i>p</i> -nitrobenzoyl-2,3,4-tri- <i>O</i> -benzyl-1-thio-β-D-glucopyranoside ( <b>6S-D-34</b> )      | S123 – S124 |
| Ethyl 2,3,4-tri- <i>O</i> -benzyl-6- <i>O</i> -( <i>N</i> -phenylcarbamoyl)-1-thio-β-D-glucopyranoside<br>( <b>35</b> )                                                          | S125 – S127 |
| Ethyl 2,3,4-tri- <i>O</i> -benzyl-(6 <i>S</i> )-[6- <sup>2</sup> <i>H</i> <sub>1</sub> ]-6- <i>O</i> -( <i>N</i> -phenylcarbamoyl)-1-thio-β-D-glucopyranoside ( <b>6S-D-35</b> ) | S128 – S129 |
| Ethyl 2,3,4,6-tetra- <i>O</i> -benzyl-1-thio-β-D-glucopyranoside ( <b>36</b> )                                                                                                   | S130 – S131 |
| Ethyl (6 <i>S</i> )-[6- <sup>2</sup> <i>H</i> <sub>1</sub> ]-2,3,4,6-tetra- <i>O</i> -benzyl-1-thio-β-D-glucopyranoside ( <b>6S-D-36</b> )                                       | S132 – S133 |

$^1\text{H}$  NMR (600 MHz,  $\text{CDCl}_3$ ) Spectrum of Phenyl 2,3,6-tri-*O*-benzyl-1-thio- $\beta$ -D-galactopyranoside (**1**)

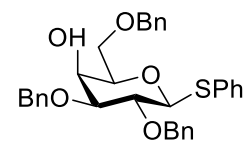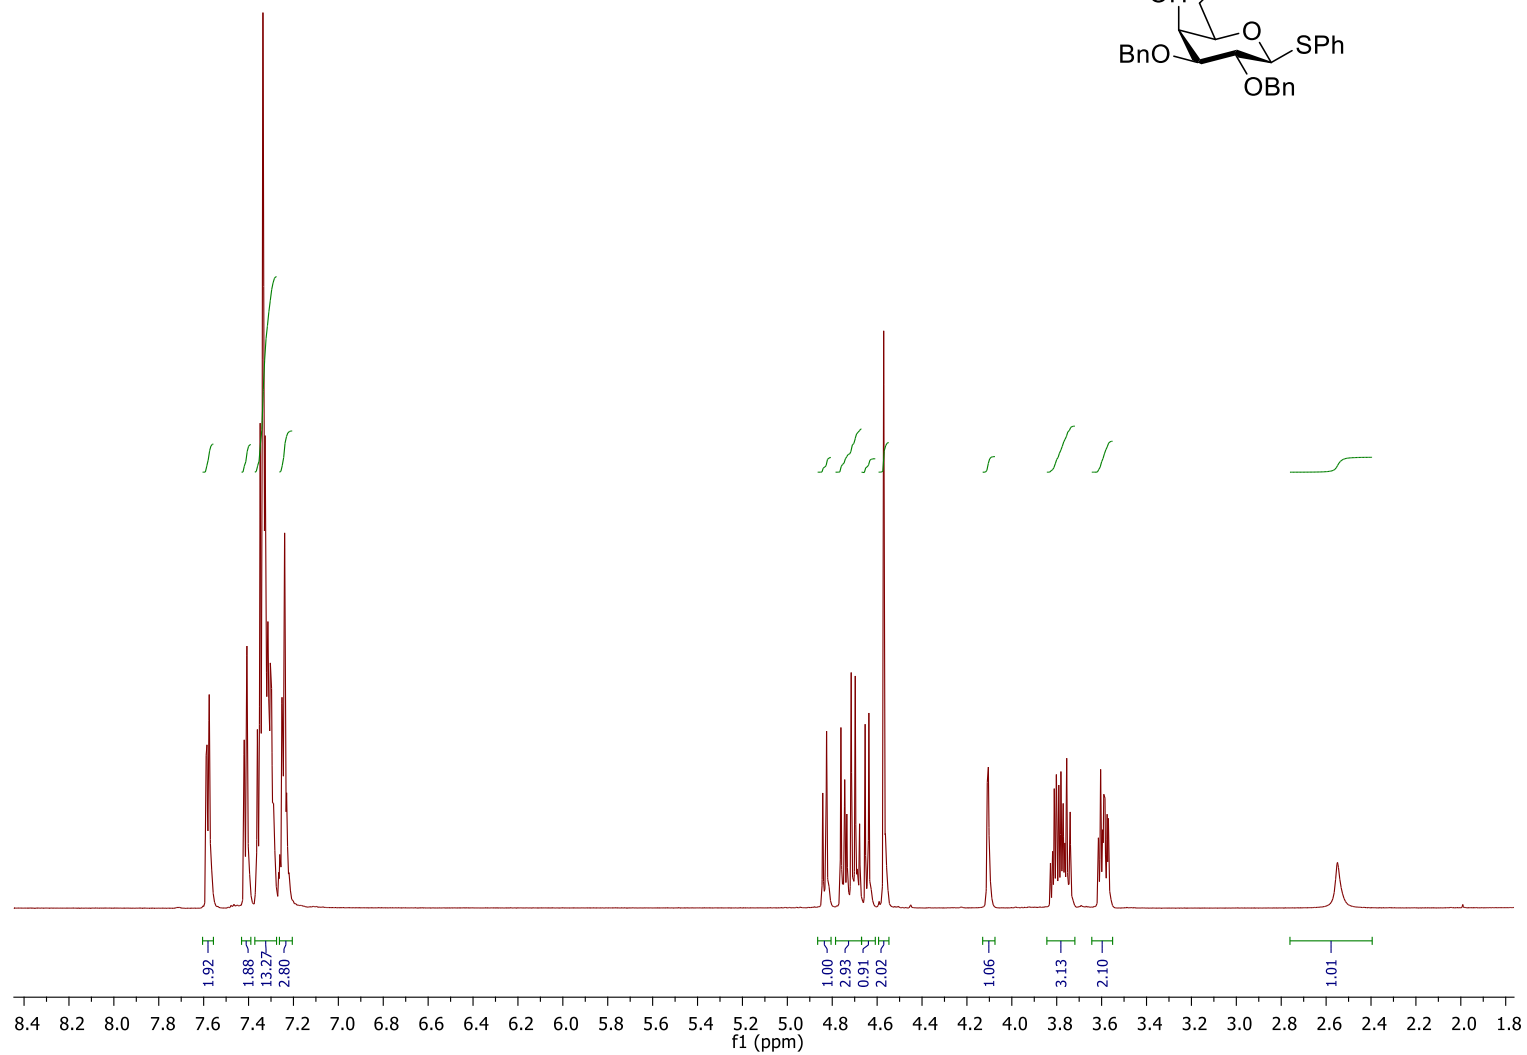

$^1\text{H}$  NMR (600 MHz,  $\text{C}_6\text{D}_6$ ) Spectrum of Phenyl 2,3,6-tri-*O*-benzyl-1-thio- $\beta$ -D-galactopyranoside (**1**)

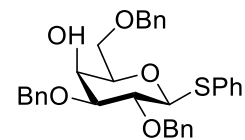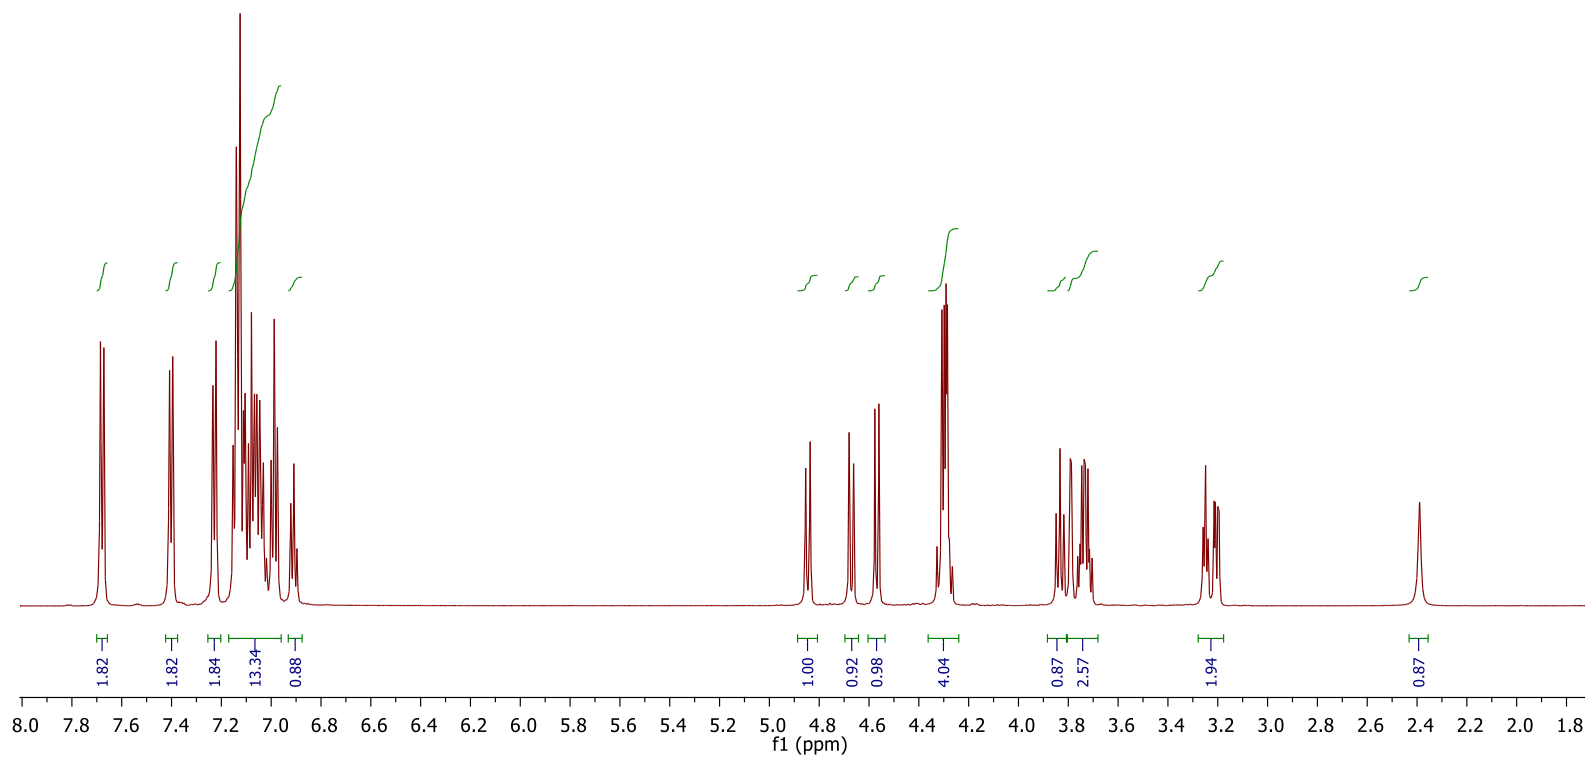

$^1\text{H}$  NMR (600 MHz,  $\text{CDCl}_3$ ) Spectrum of Phenyl (6*S*)-[6- $^2\text{H}_1$ ]-2,3,6-tri-*O*-benzyl-1-thio- $\beta$ -D-galactopyranoside (**6S-D-1**)

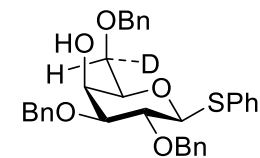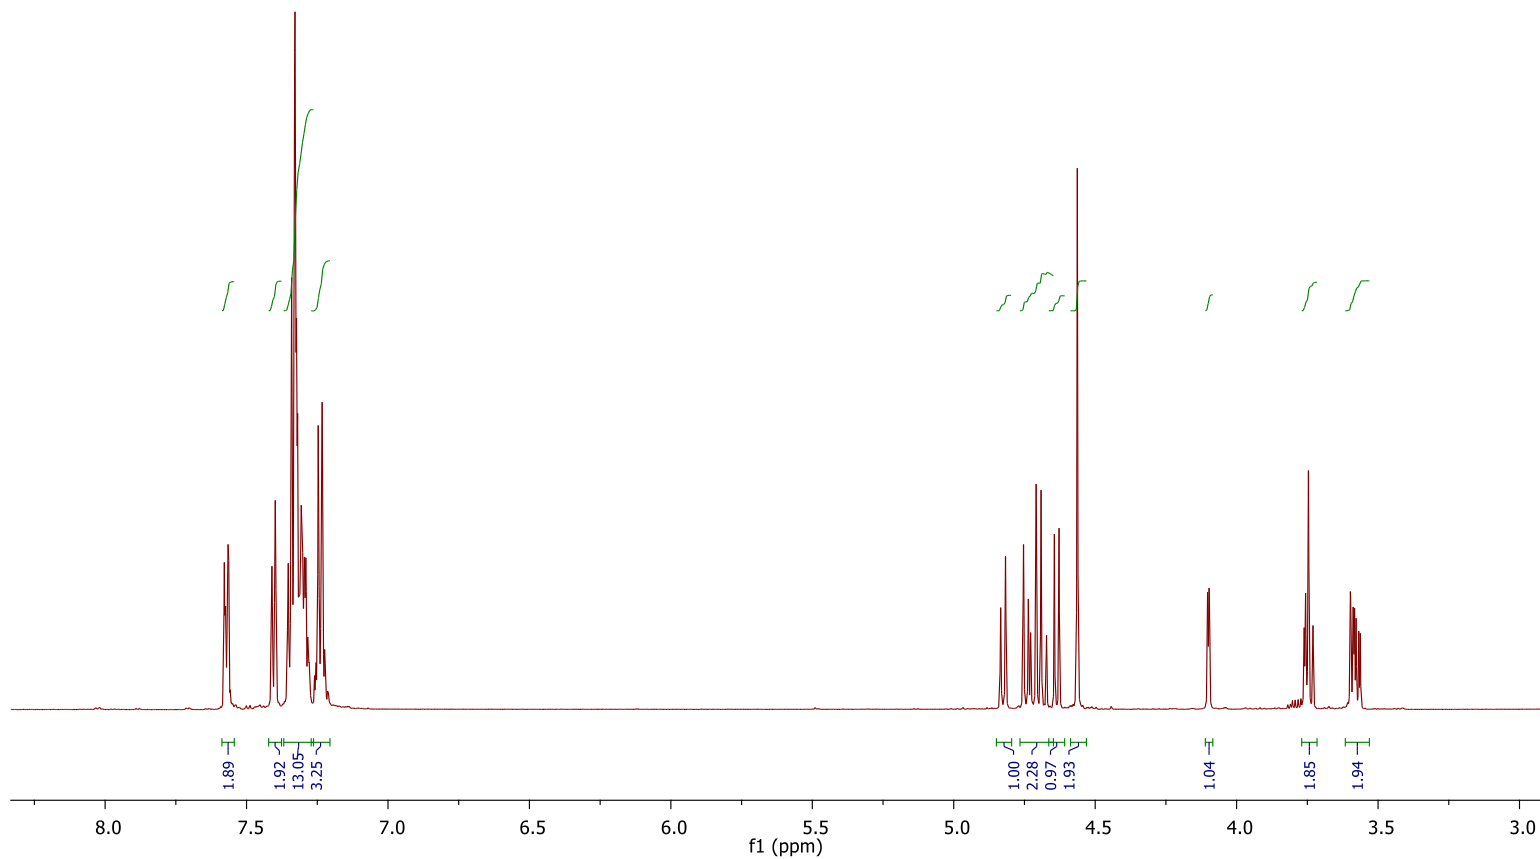

$^1\text{H}$  NMR (600 MHz,  $\text{C}_6\text{D}_6$ ) Spectrum of Phenyl (6*S*)-[6- $^2\text{H}_1$ ]-2,3,6-tri-*O*-benzyl-1-thio- $\beta$ -D-galactopyranoside (**6S-D-1**)

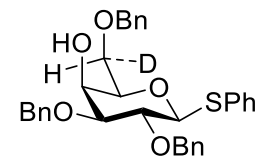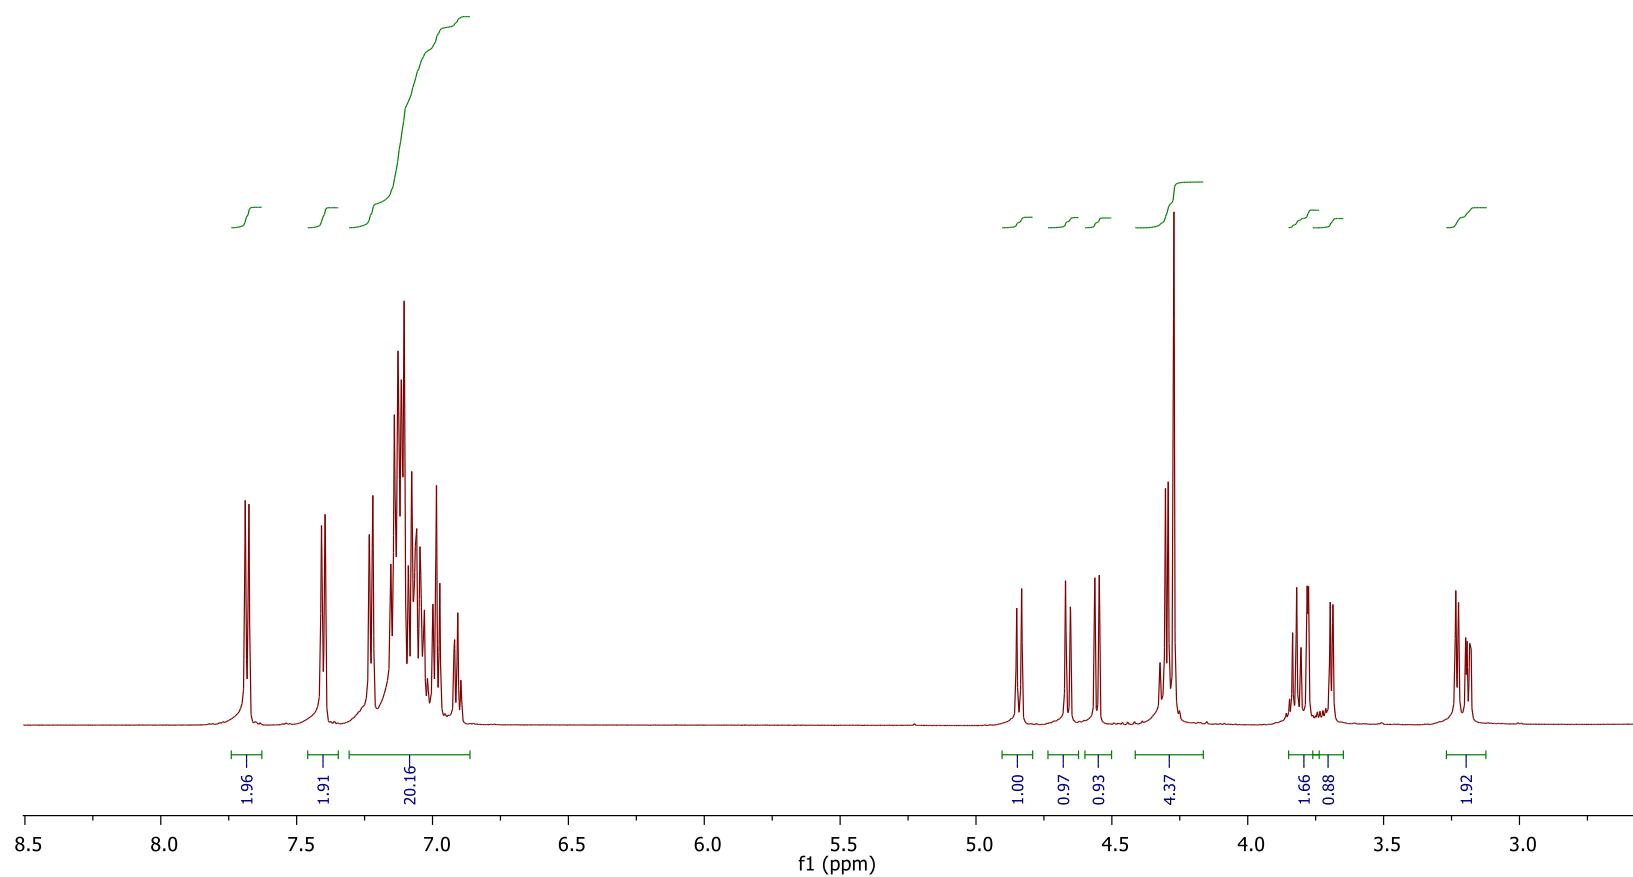



$^1\text{H}$  NMR (600 MHz,  $\text{CDCl}_3$ ) Spectrum of Phenyl 2,3,6-tri-*O*-benzyl-1-thio- $\beta$ -D-glucopyranoside (**2**)

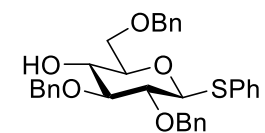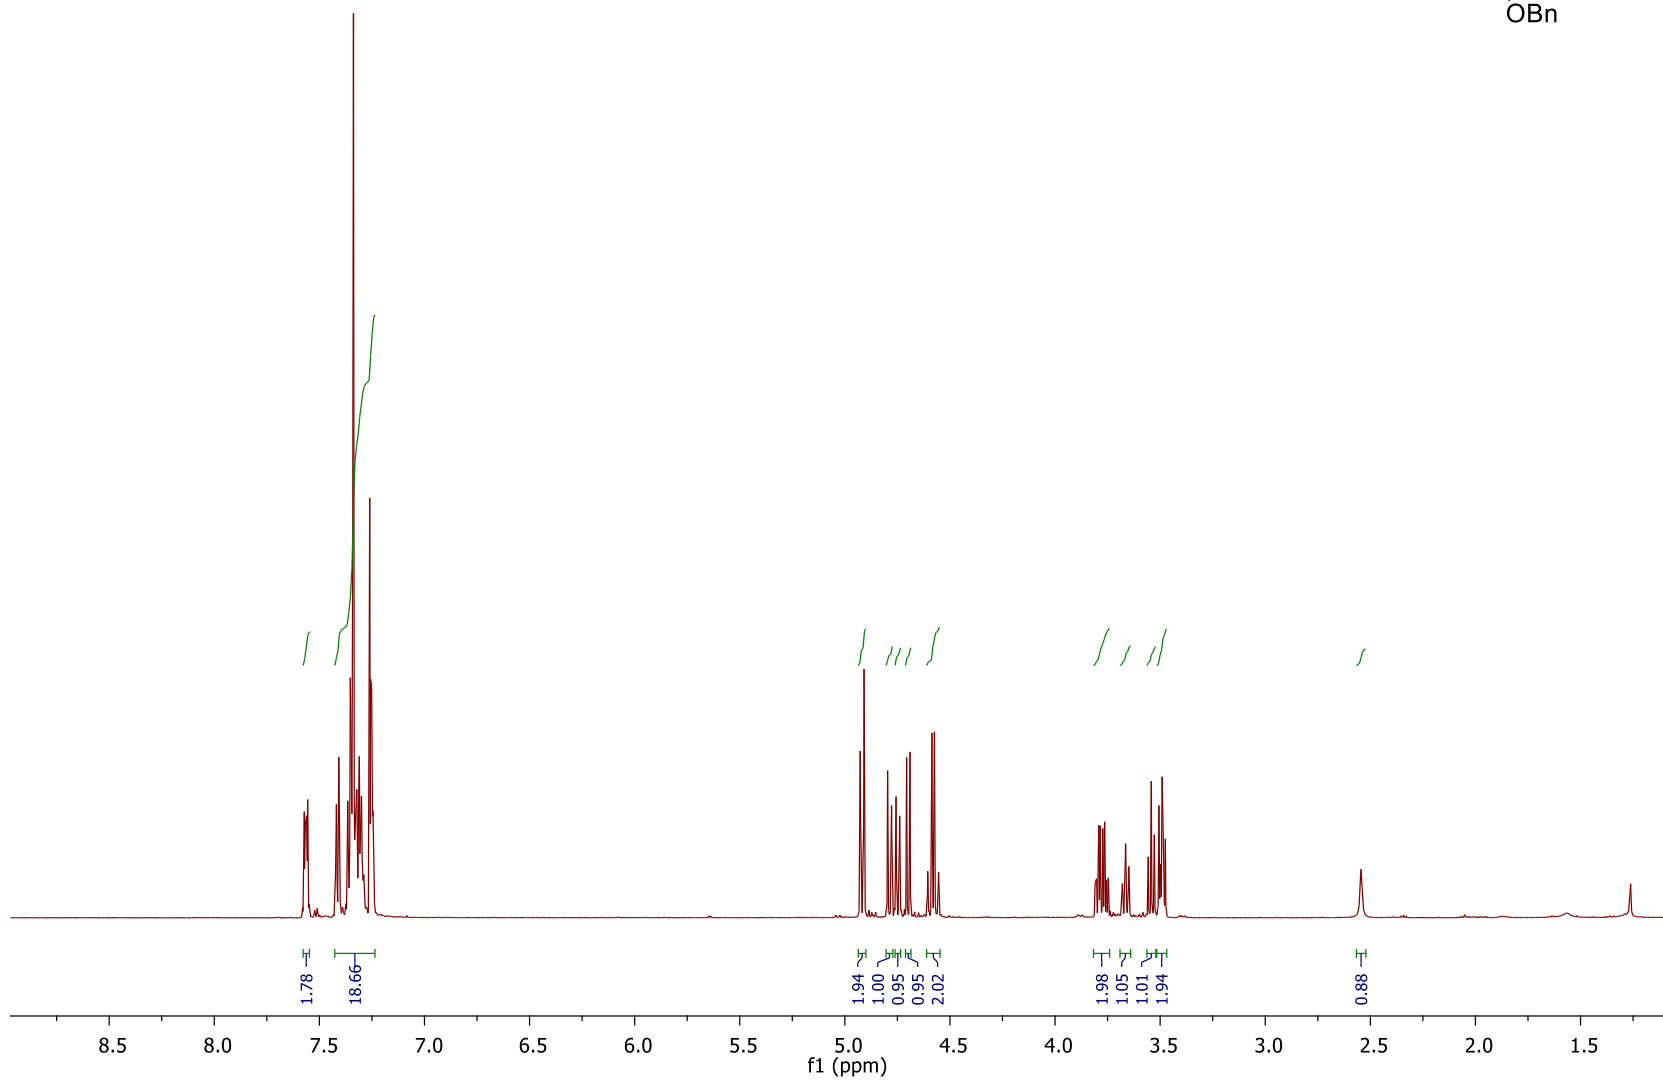

$^1\text{H}$  NMR (600 MHz,  $\text{C}_6\text{D}_6$ ) Spectrum of Phenyl 2,3,6-tri-*O*-benzyl-1-thio- $\beta$ -D-glucopyranoside (**2**)

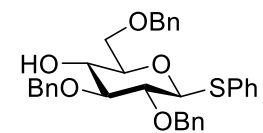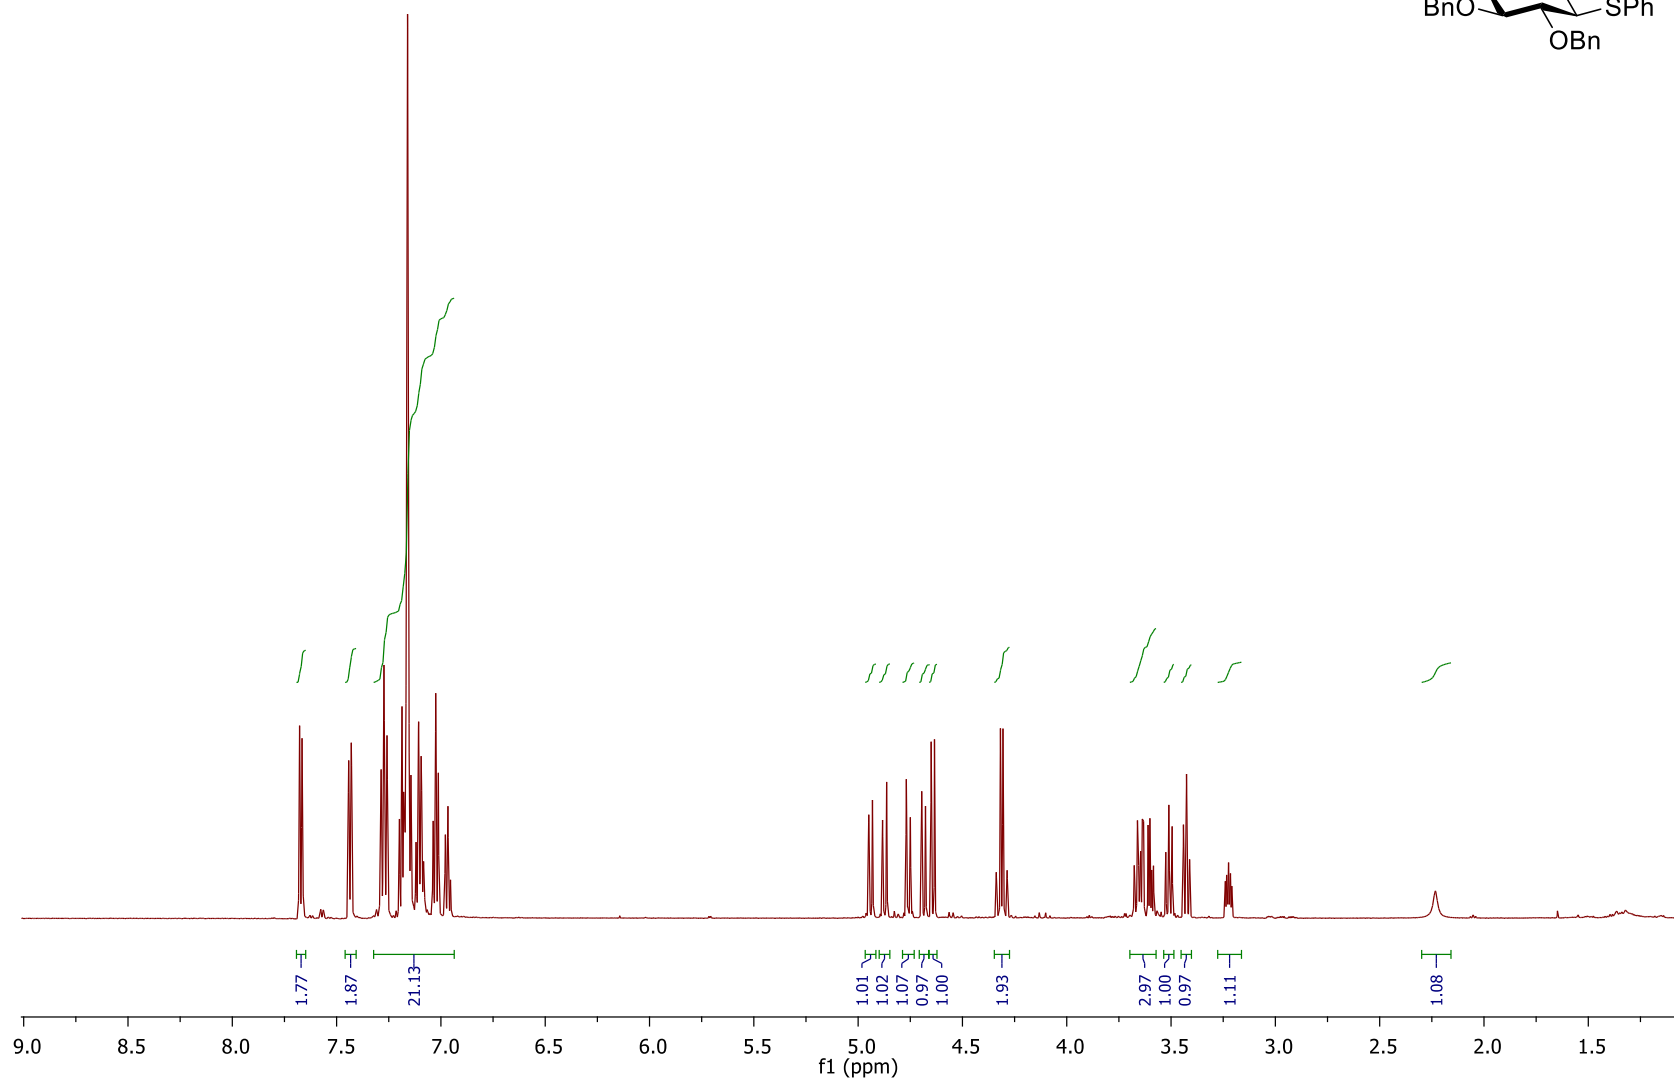

$^1\text{H}$  NMR (600 MHz,  $\text{CDCl}_3$ ) Spectrum of Phenyl (6*S*)-[6- $^2\text{H}_1$ ]-2,3,6-tri-*O*-benzyl-1-thio- $\beta$ -D-glucopyranoside(6*S*-**D-2**)

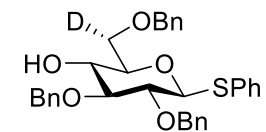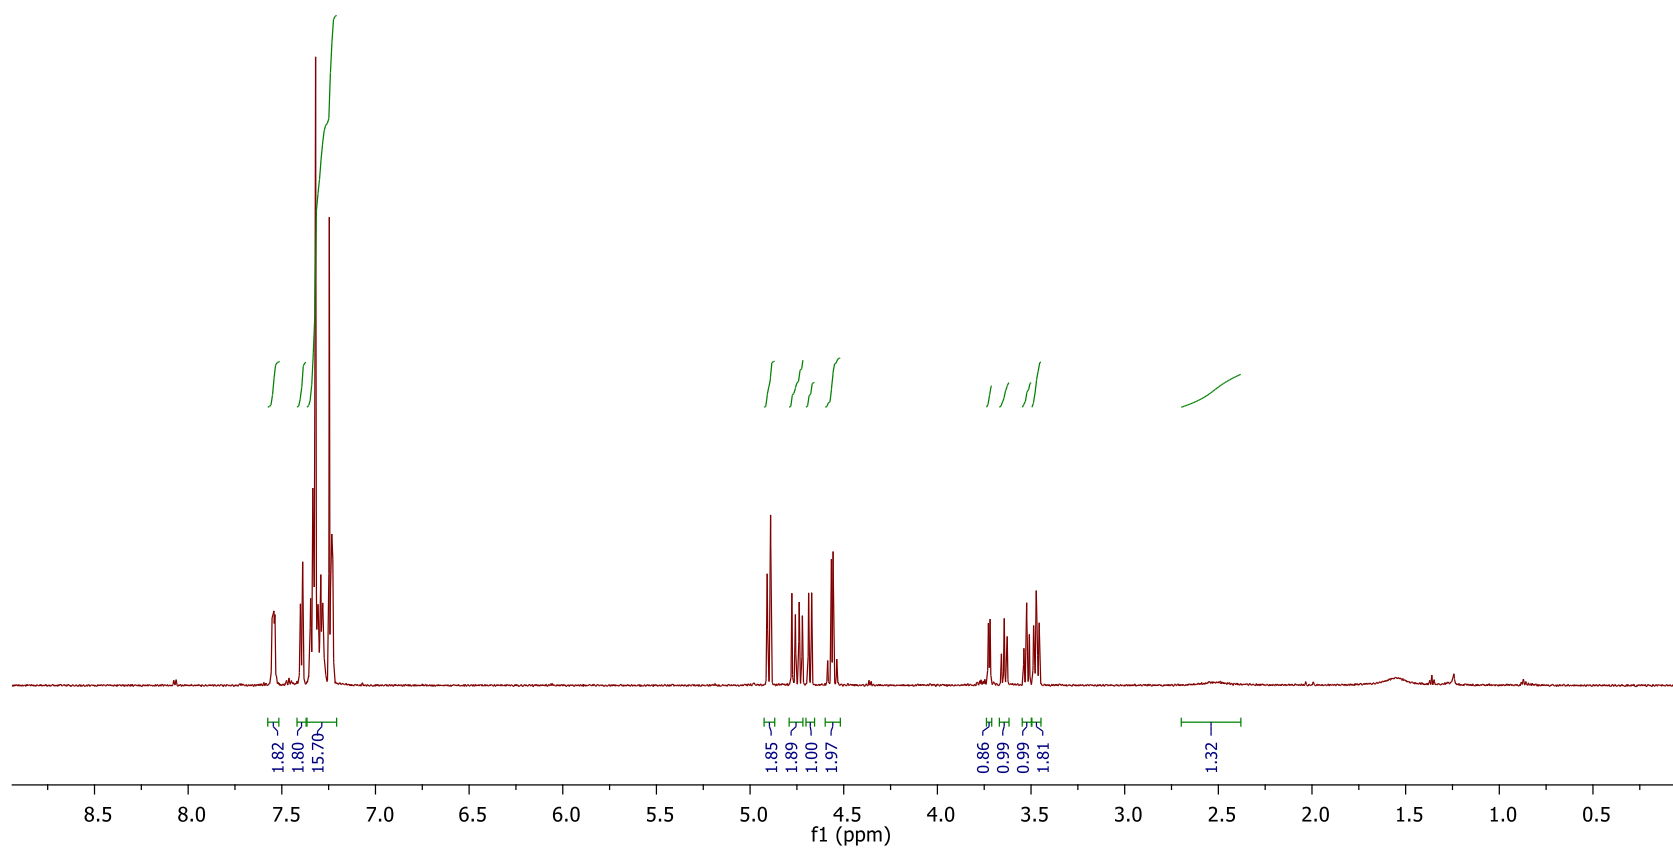

S11

$^1\text{H}$  NMR (600 MHz,  $\text{C}_6\text{D}_6$ ) Spectrum of Phenyl (6*S*)-[6- $^2\text{H}_1$ ]-2,3,6-tri-*O*-benzyl-1-thio- $\beta$ -D-glucopyranoside (**6*S*-D-2**)

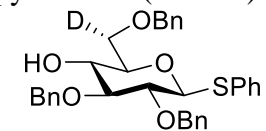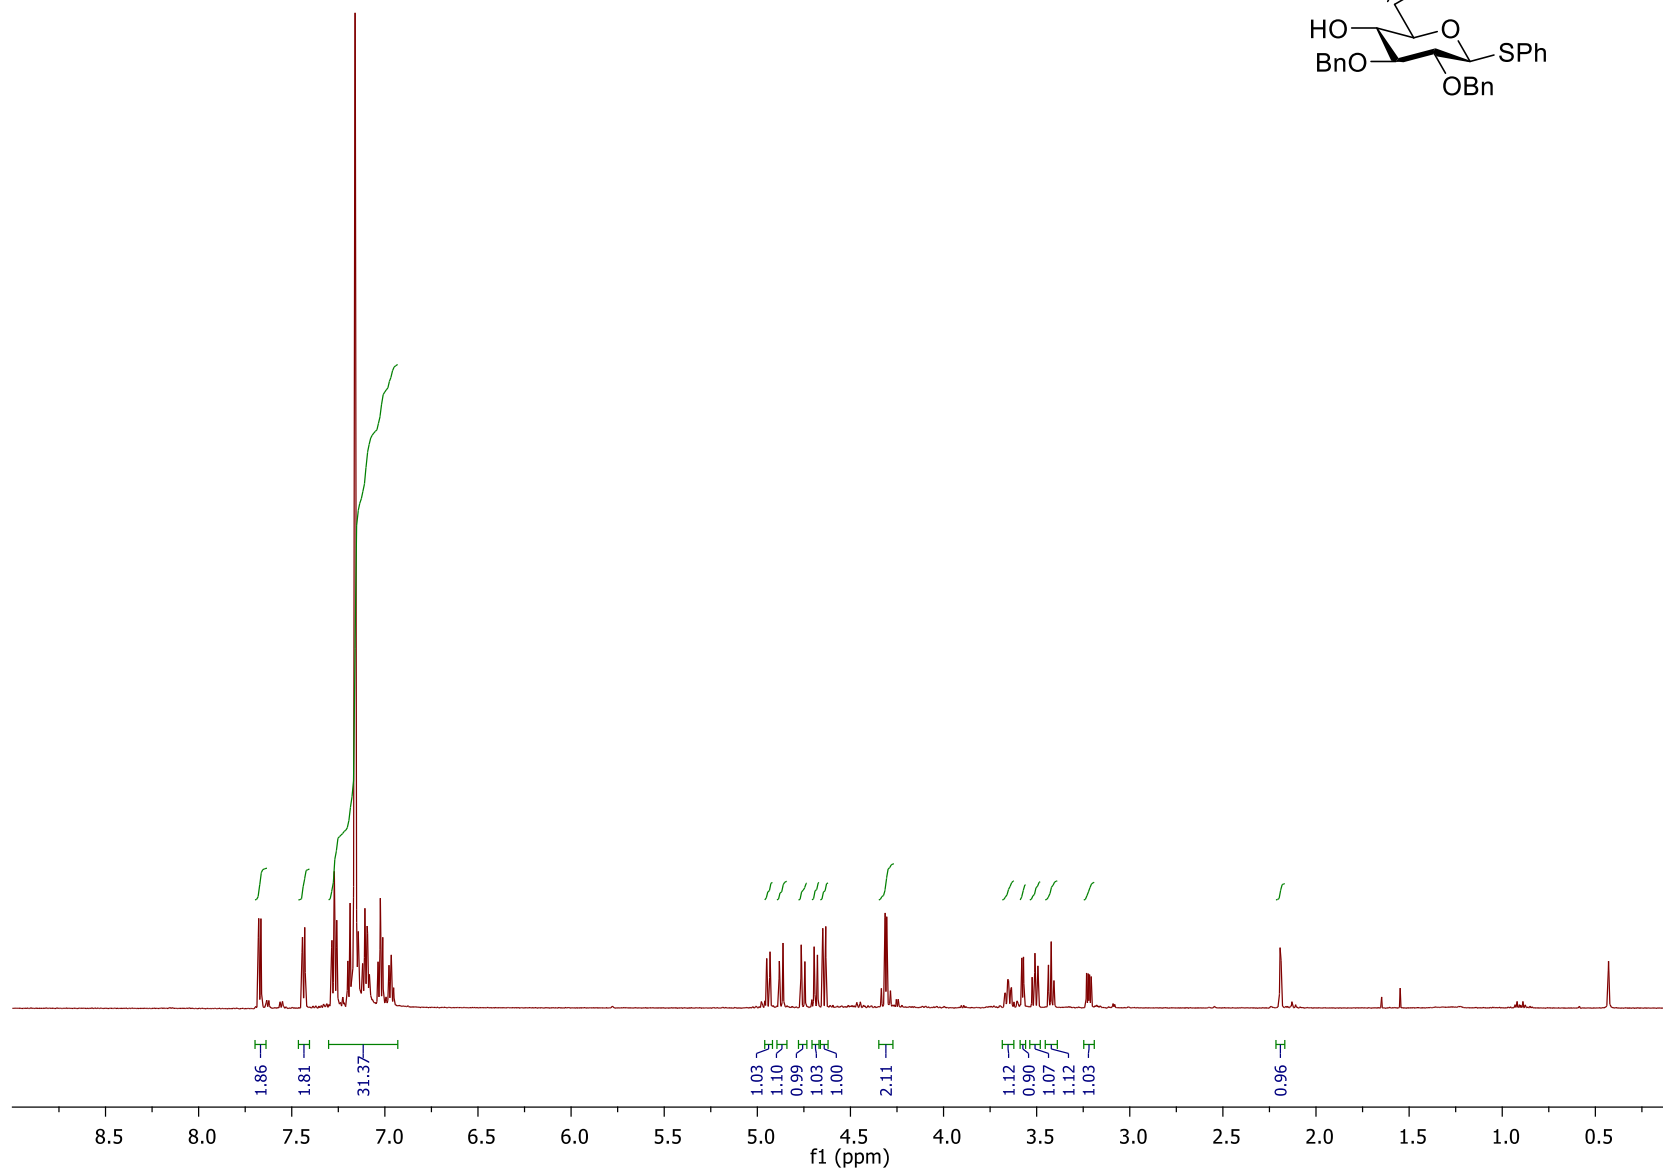

$^1\text{H}$  NMR (600 MHz,  $\text{CDCl}_3$ ) Spectrum of Ethyl 2,3,4-tri-*O*-benzyl-1-thio- $\beta$ -D-glucopyranoside (**3**)

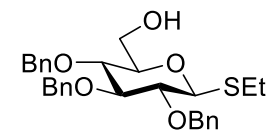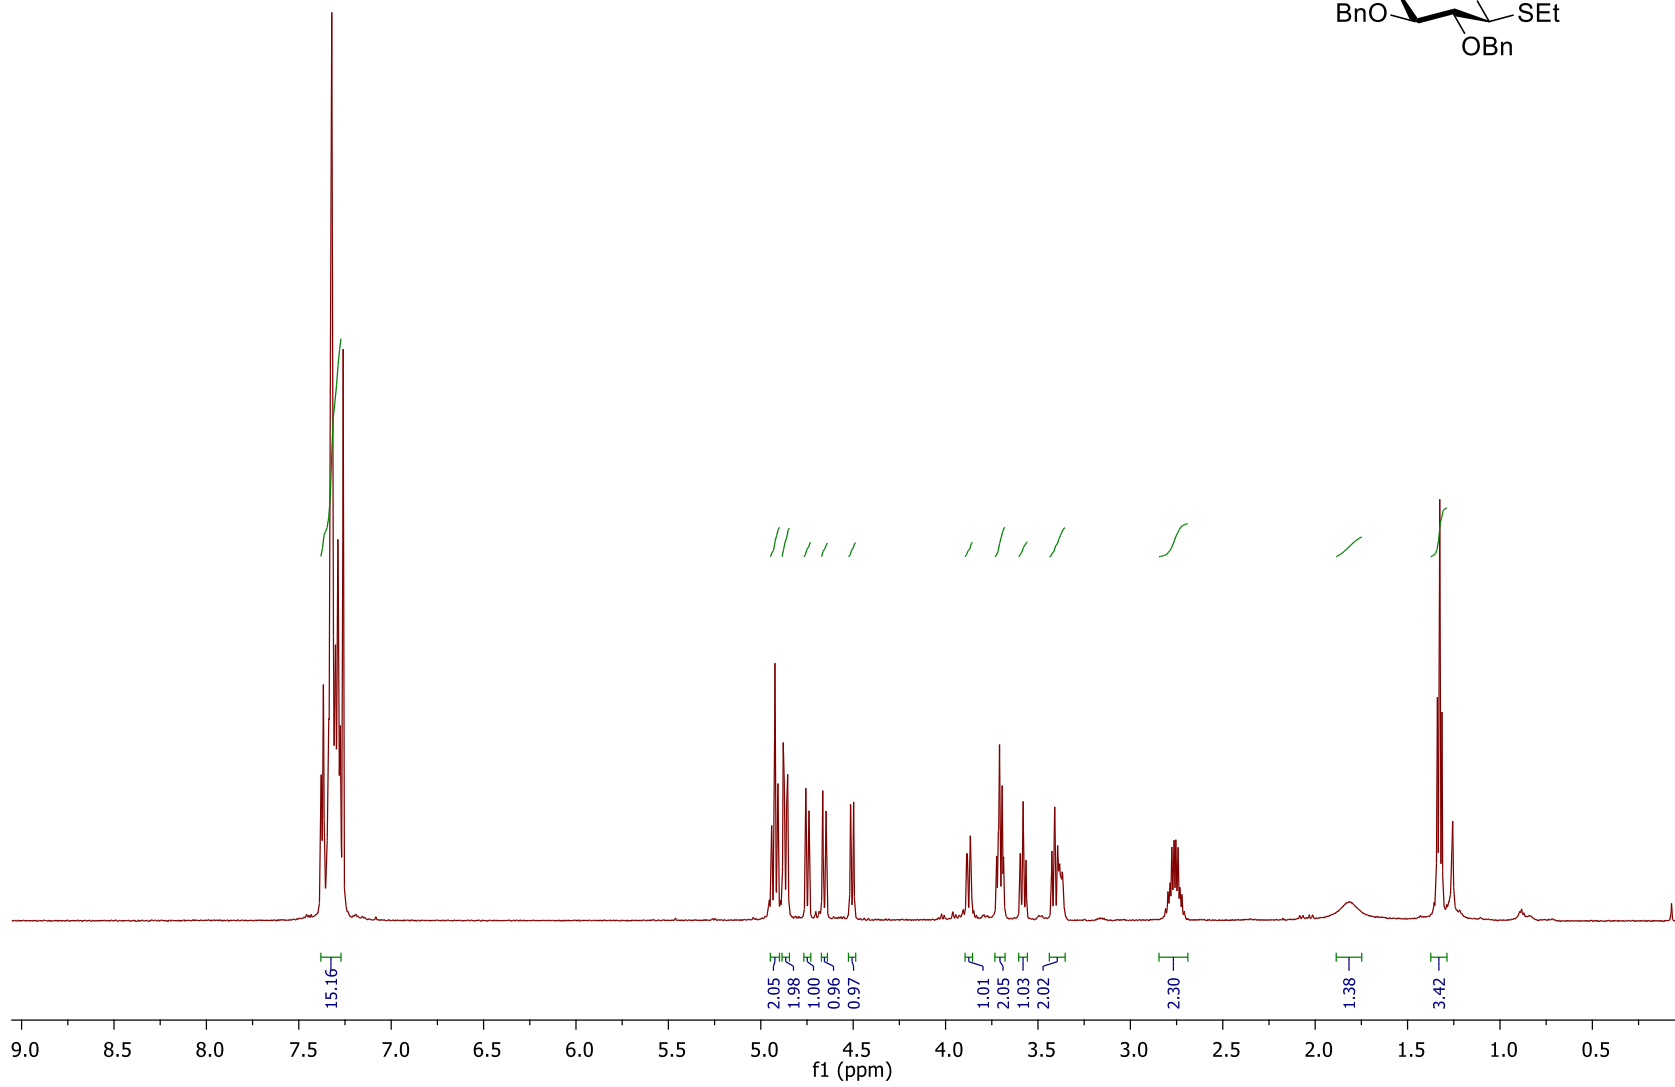

$^1\text{H}$  NMR (600 MHz,  $\text{C}_6\text{D}_6$ ) Spectrum of Ethyl 2,3,4-tri-*O*-benzyl-1-thio- $\beta$ -D-glucopyranoside (**3**)

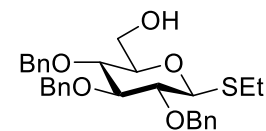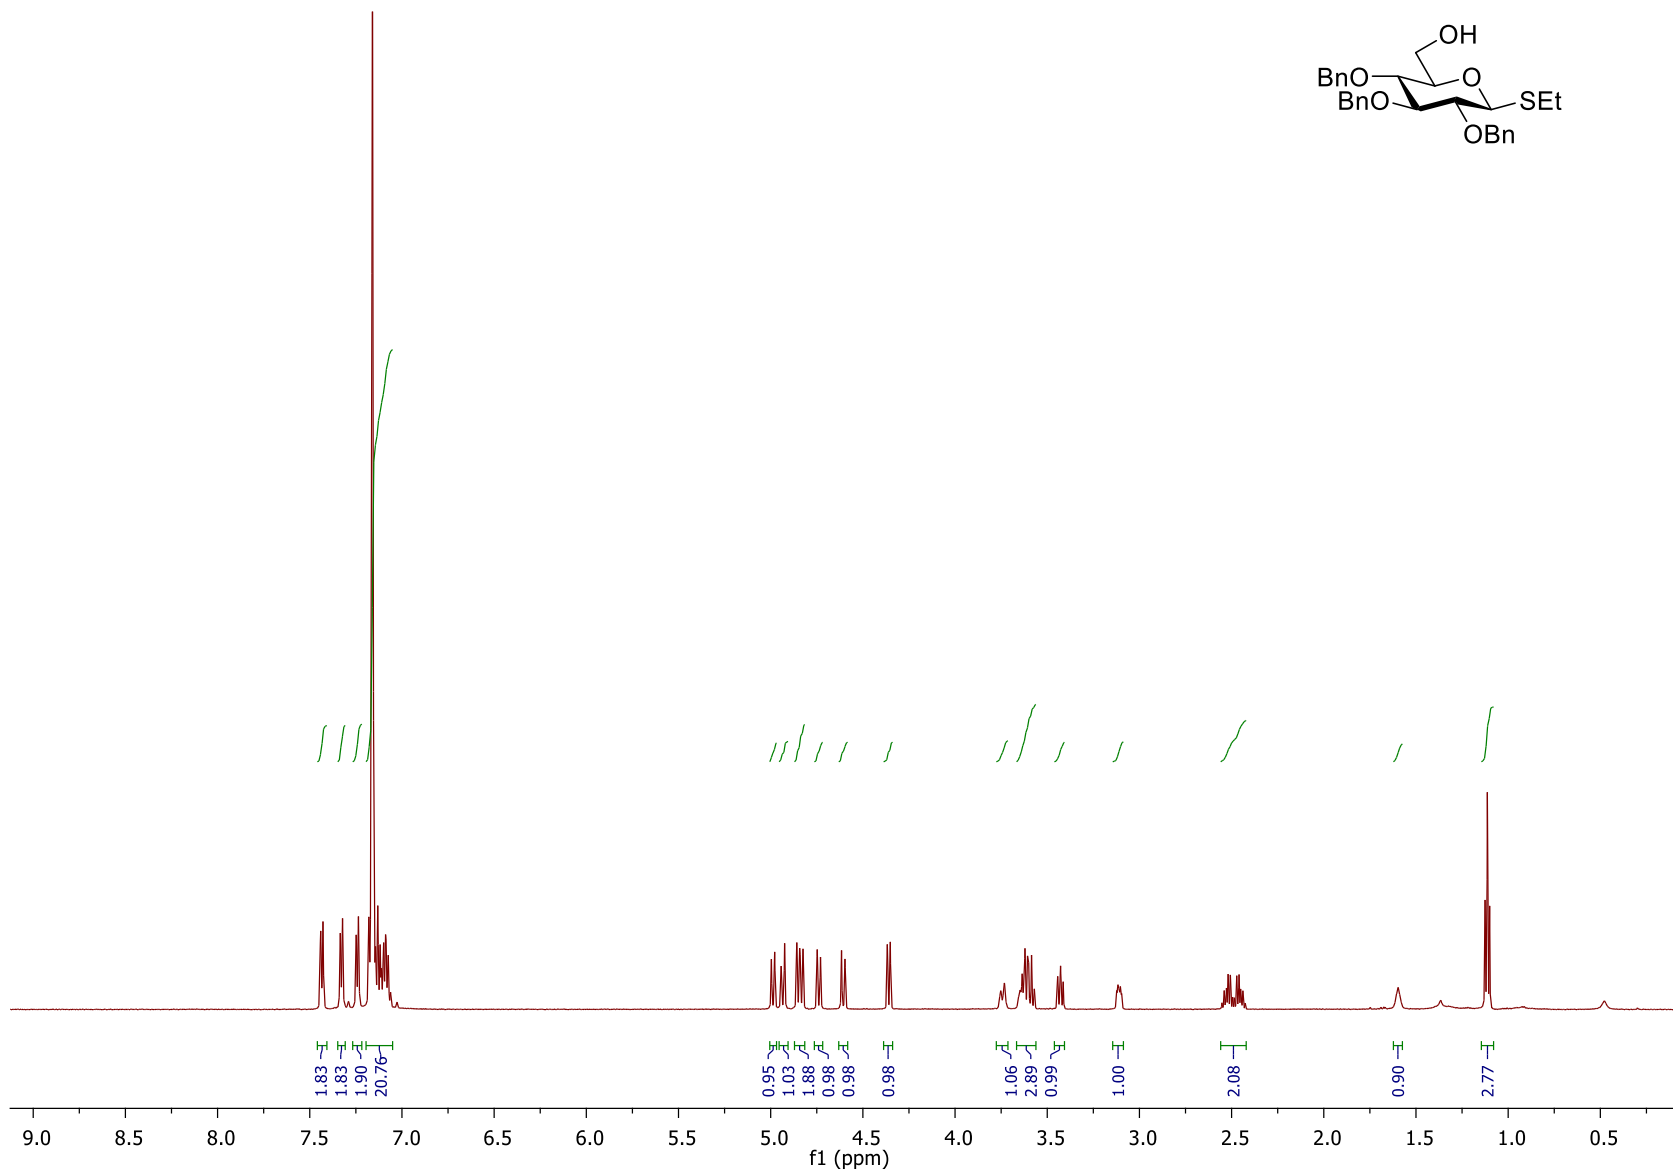

$^1\text{H}$  NMR (400 MHz,  $\text{CDCl}_3$ ) Spectrum of Ethyl (6*S*)-[6- $^2\text{H}_1$ ]-2,3,4,6-tetra-*O*-acetyl-1-thio- $\beta$ -D-glucopyranoside (**6*S*-D-3**)

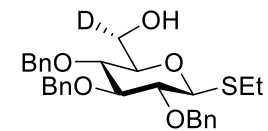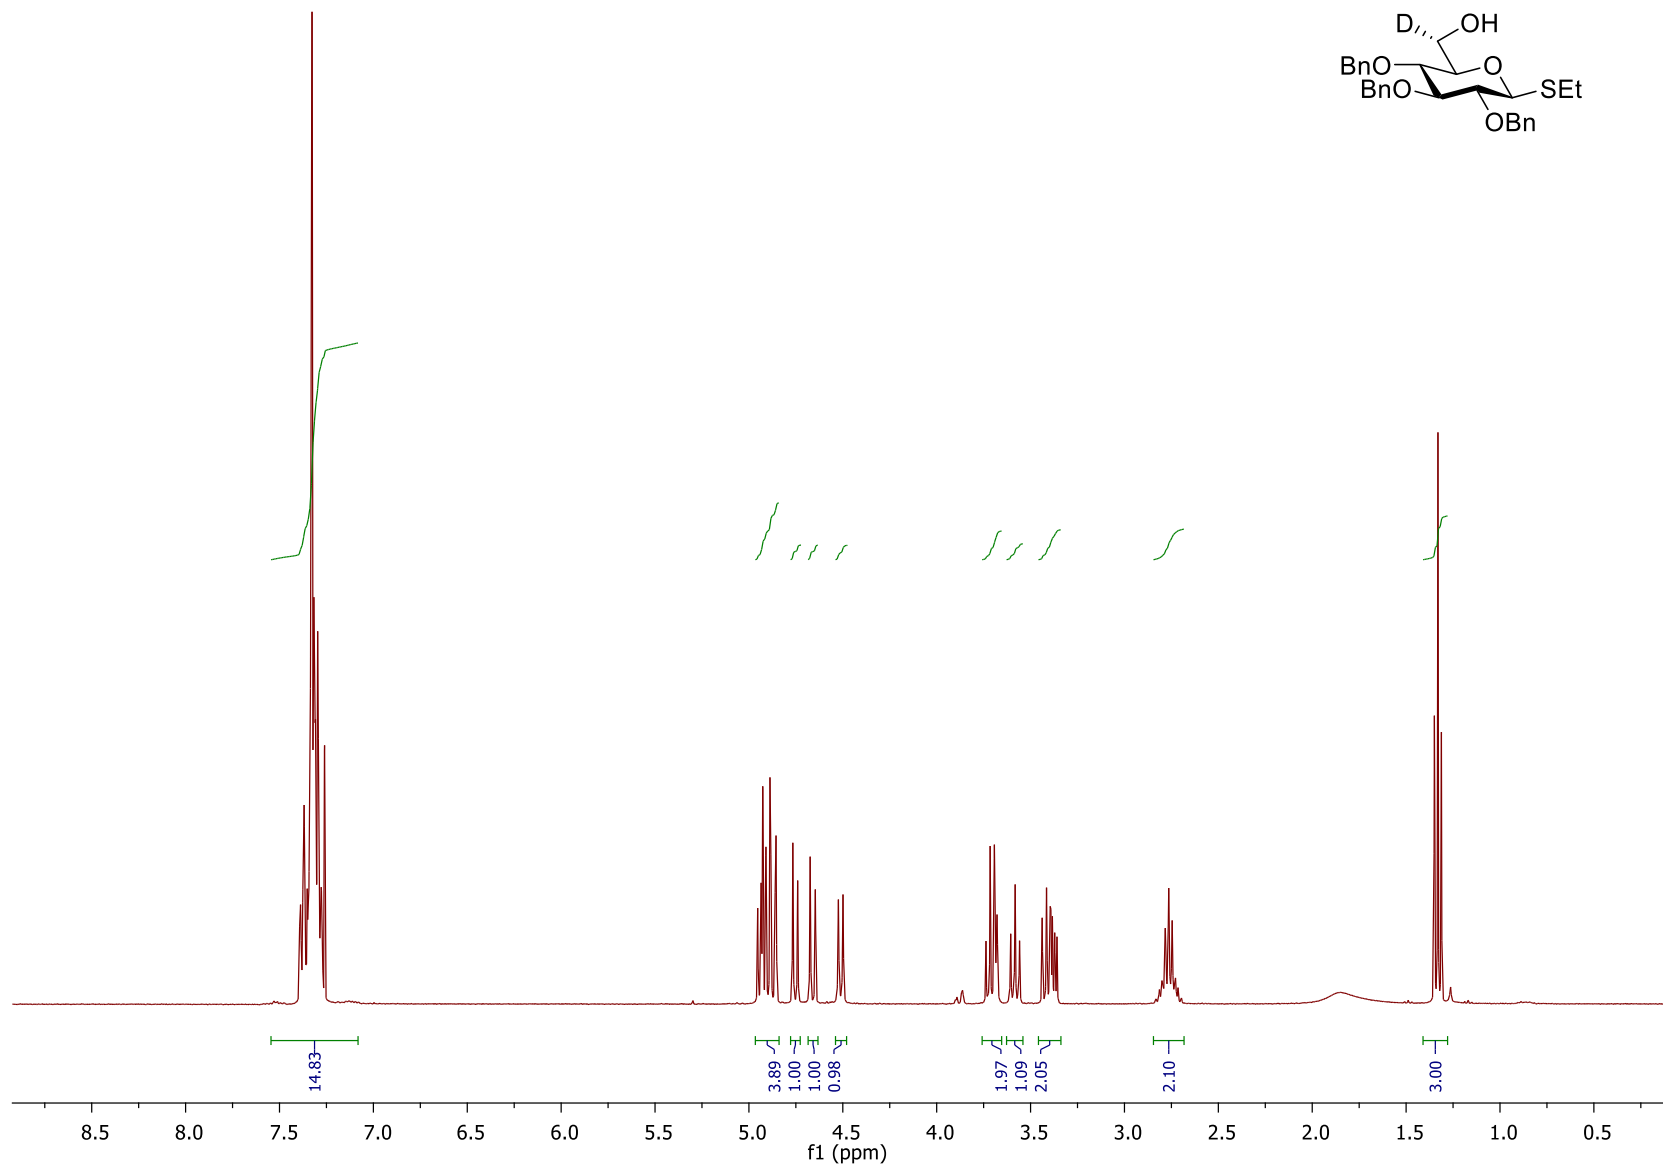

$^1\text{H}$  NMR (400 MHz,  $\text{CDCl}_3$ ) Spectrum of (6*S*)-1,6-Anhydro-2,3,4-tri-*O*-acetyl-6-bromo- $\beta$ -D-galactopyranose (**5**)

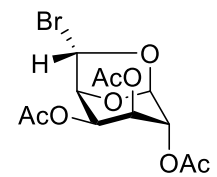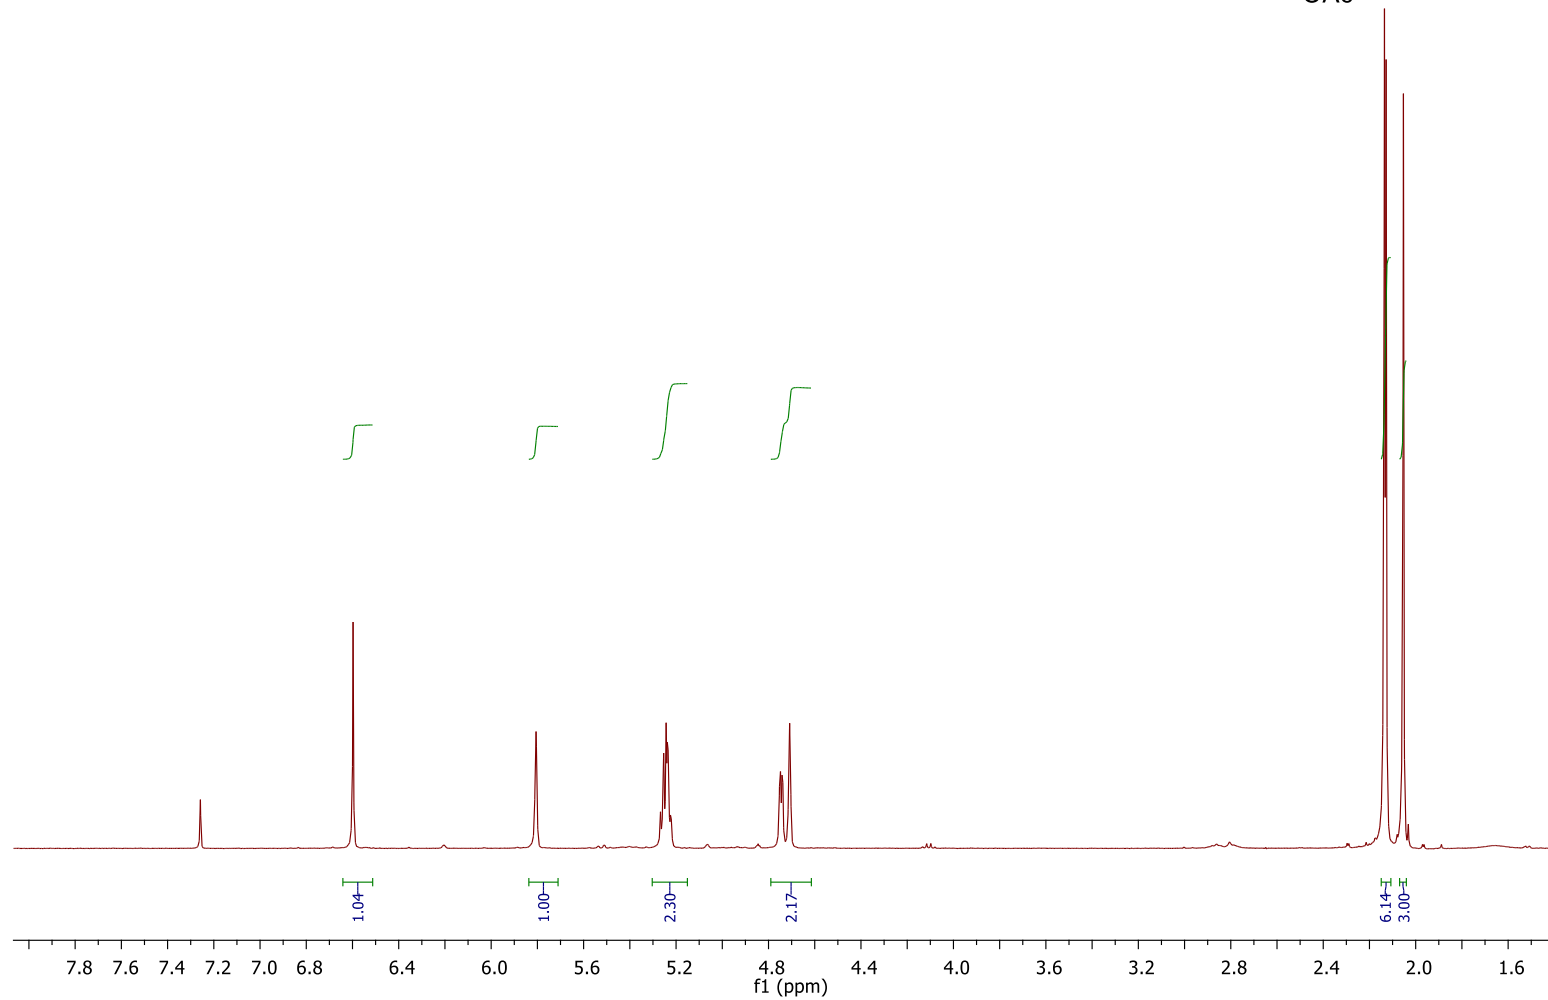



$^1\text{H}$  NMR (100 MHz,  $\text{CDCl}_3$ ) Spectrum of (6*S*)-1,6-Anhydro-2,3,4-tri-*O*-acetyl-6-bromo- $\beta$ -D-galactopyranose (**5**)

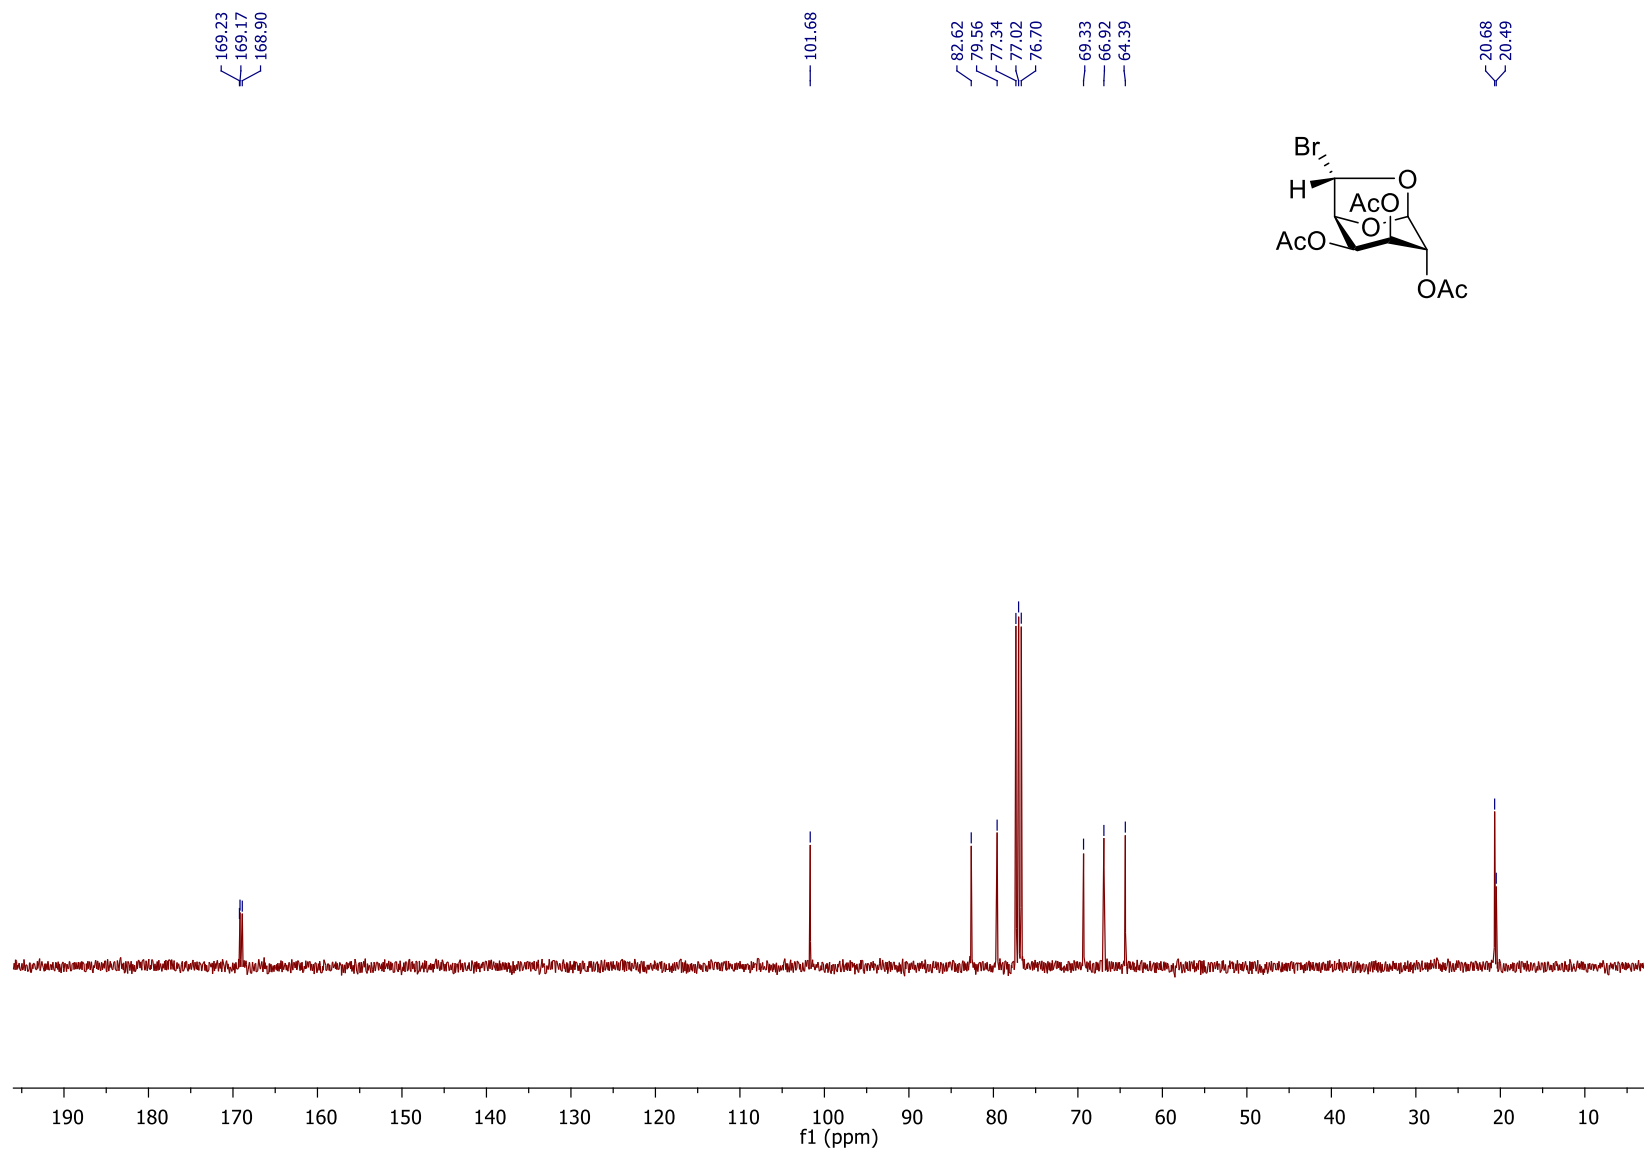

$^1\text{H}$  NMR (400 MHz,  $\text{CDCl}_3$ ) Spectrum of (6*S*)-[6- $^2\text{H}_1$ ]-1,6-Anhydro-2,3,4-tri-*O*-acetyl- $\beta$ -D-galactopyranose (**6**)

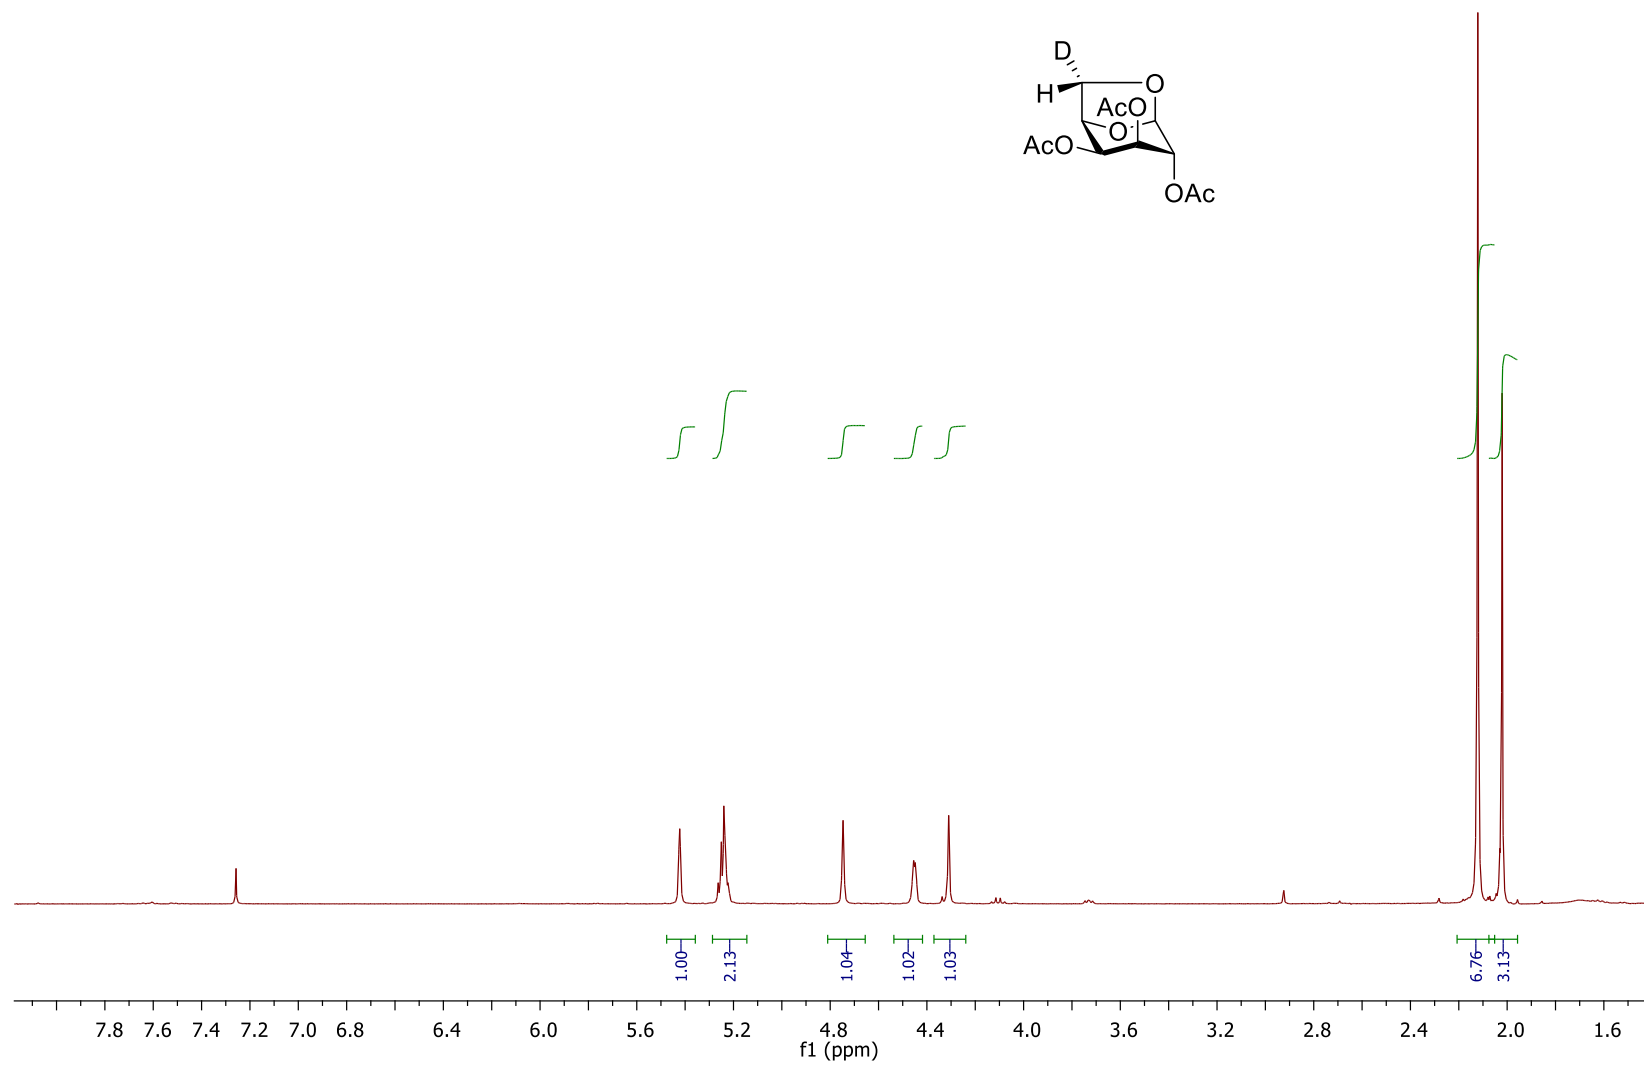

$^{13}\text{C}$  NMR (100 MHz,  $\text{CDCl}_3$ ) Spectrum of (6*S*)-[6- $^2\text{H}_1$ ]-1,6-Anhydro-2,3,4-tri-O-acetyl- $\beta$ -D-galactopyranose (**6**)

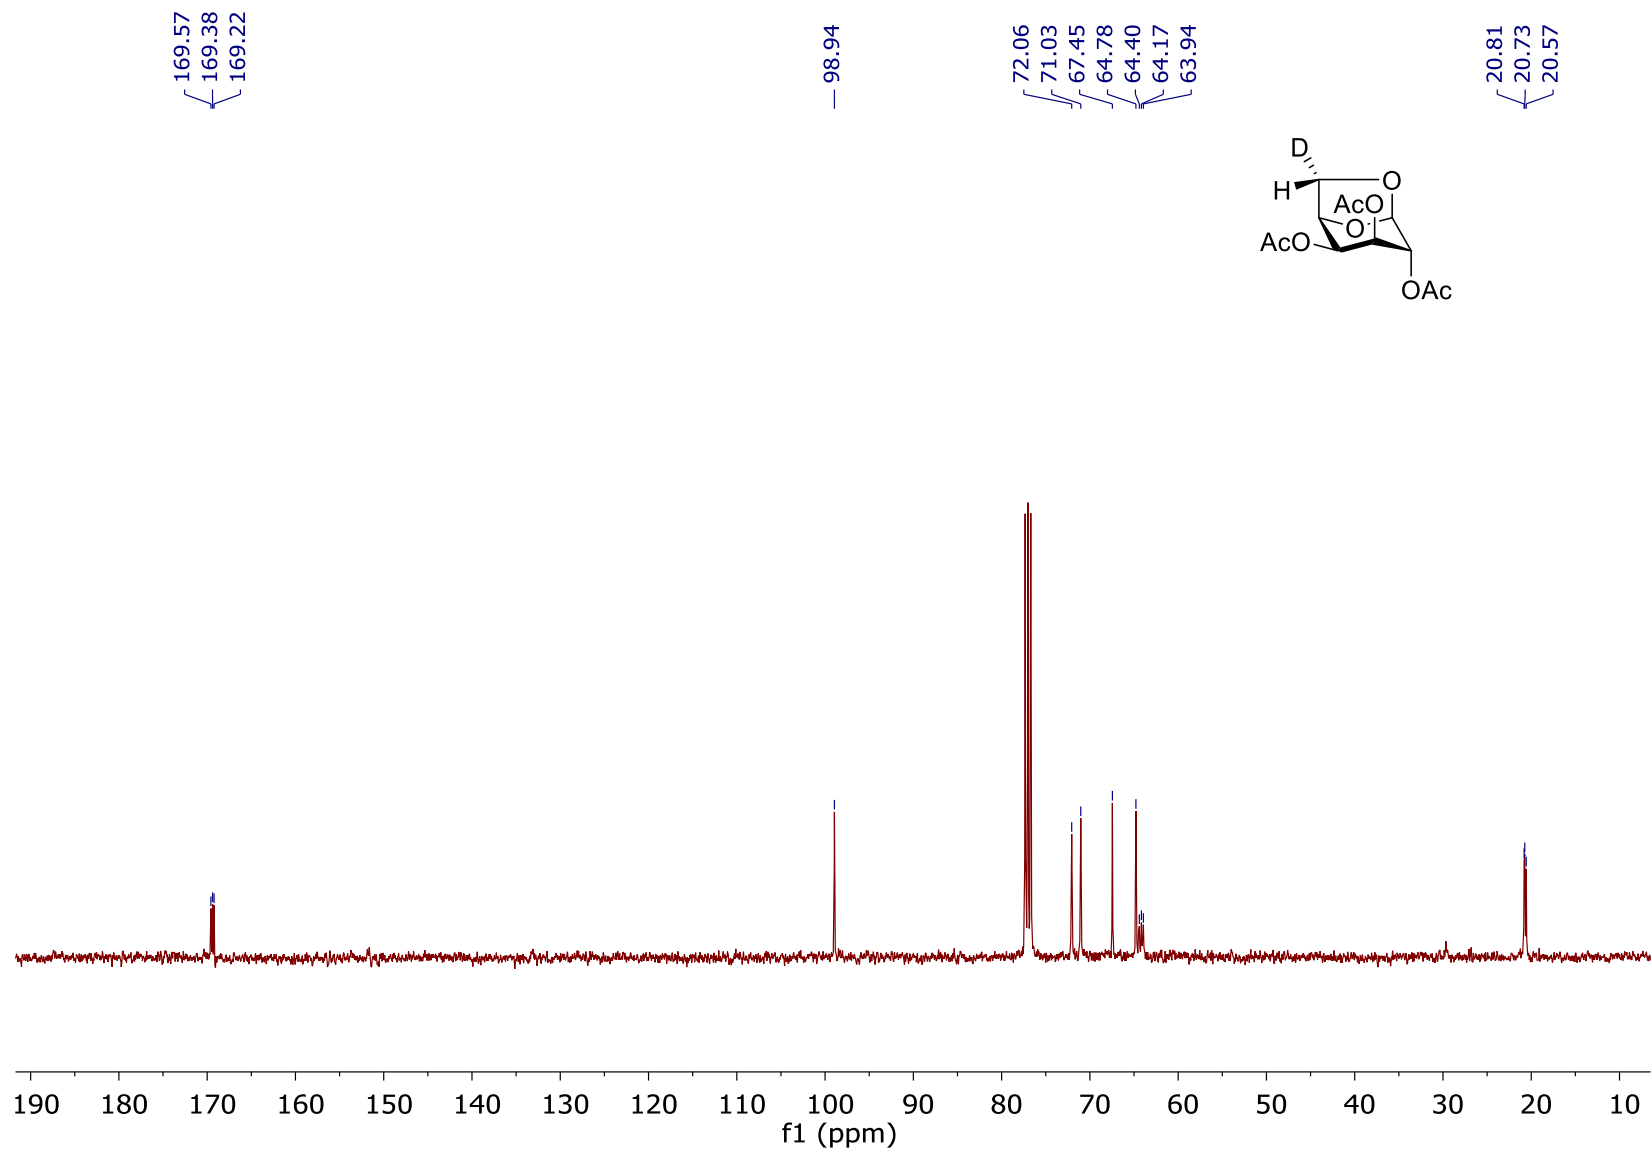

$^1\text{H}$  NMR (400 MHz,  $\text{CDCl}_3$ ) Spectrum of Phenyl (6*S*)-[6- $^2\text{H}_1$ ]-2,3,4,6-tetra-*O*-acetyl-1-thio- $\beta$ -D-galactopyranoside (**8**)

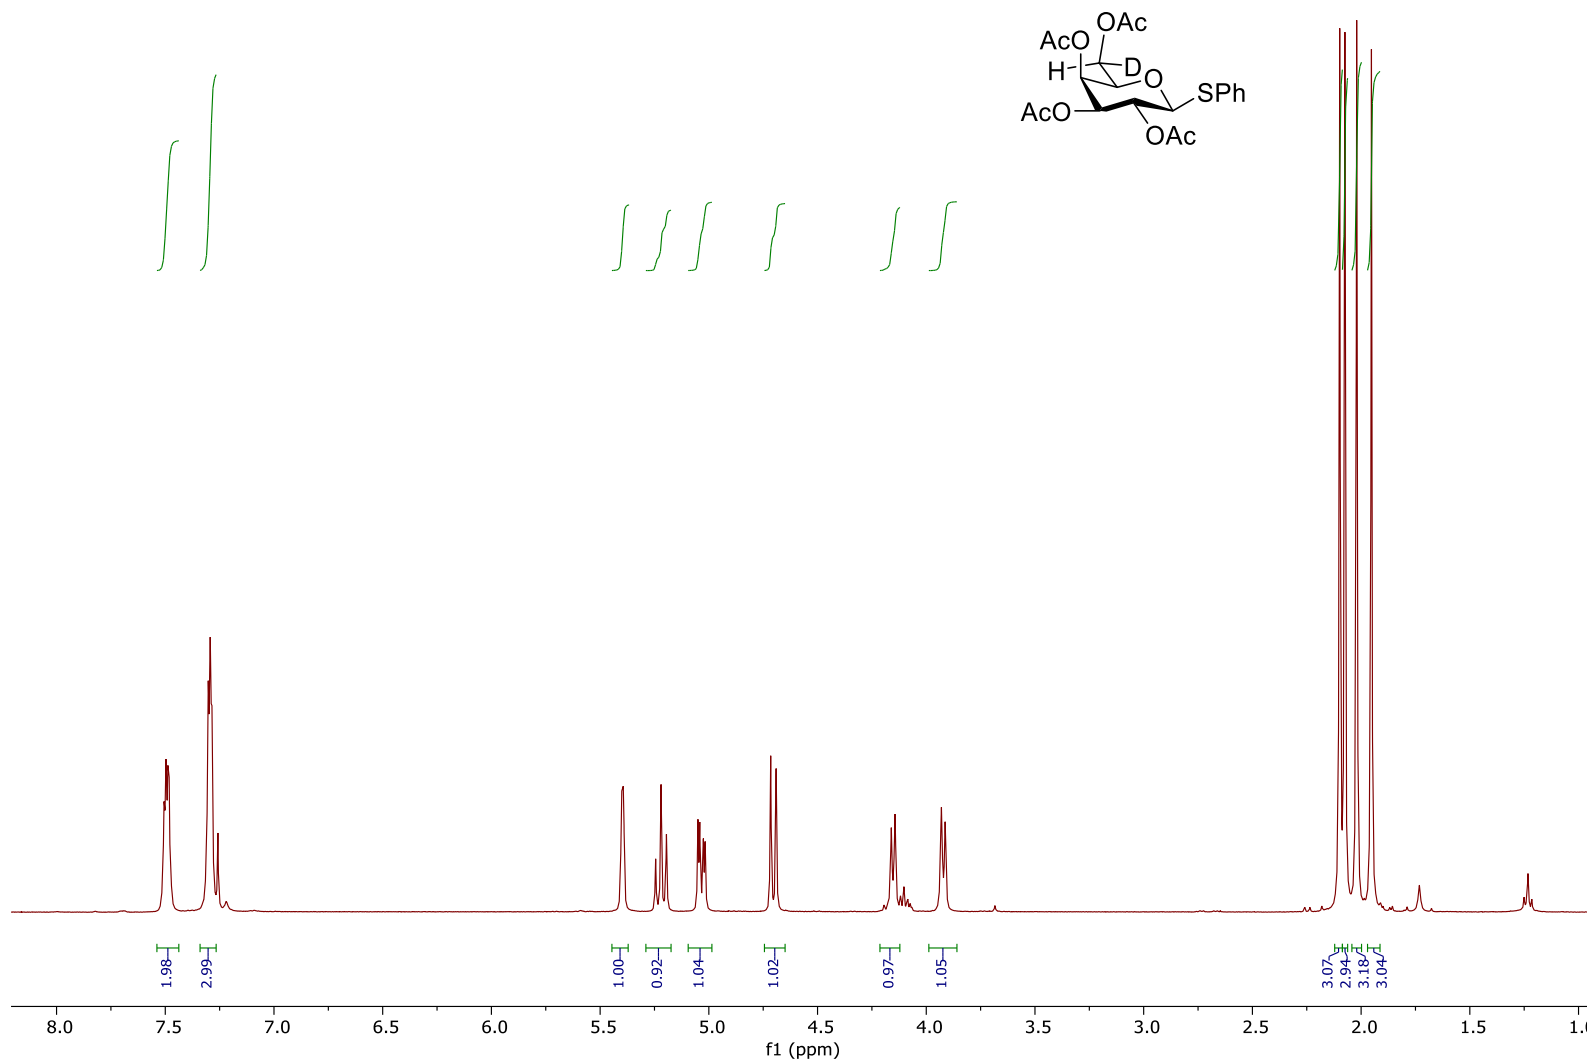

$^{13}\text{C}$  NMR (100 MHz,  $\text{CDCl}_3$ ) Spectrum of Phenyl (6*S*)-[6- $^2H_1$ ]-2,3,4,6-tetra-*O*-acetyl-1-thio- $\beta$ -D-galactopyranoside (**8**)

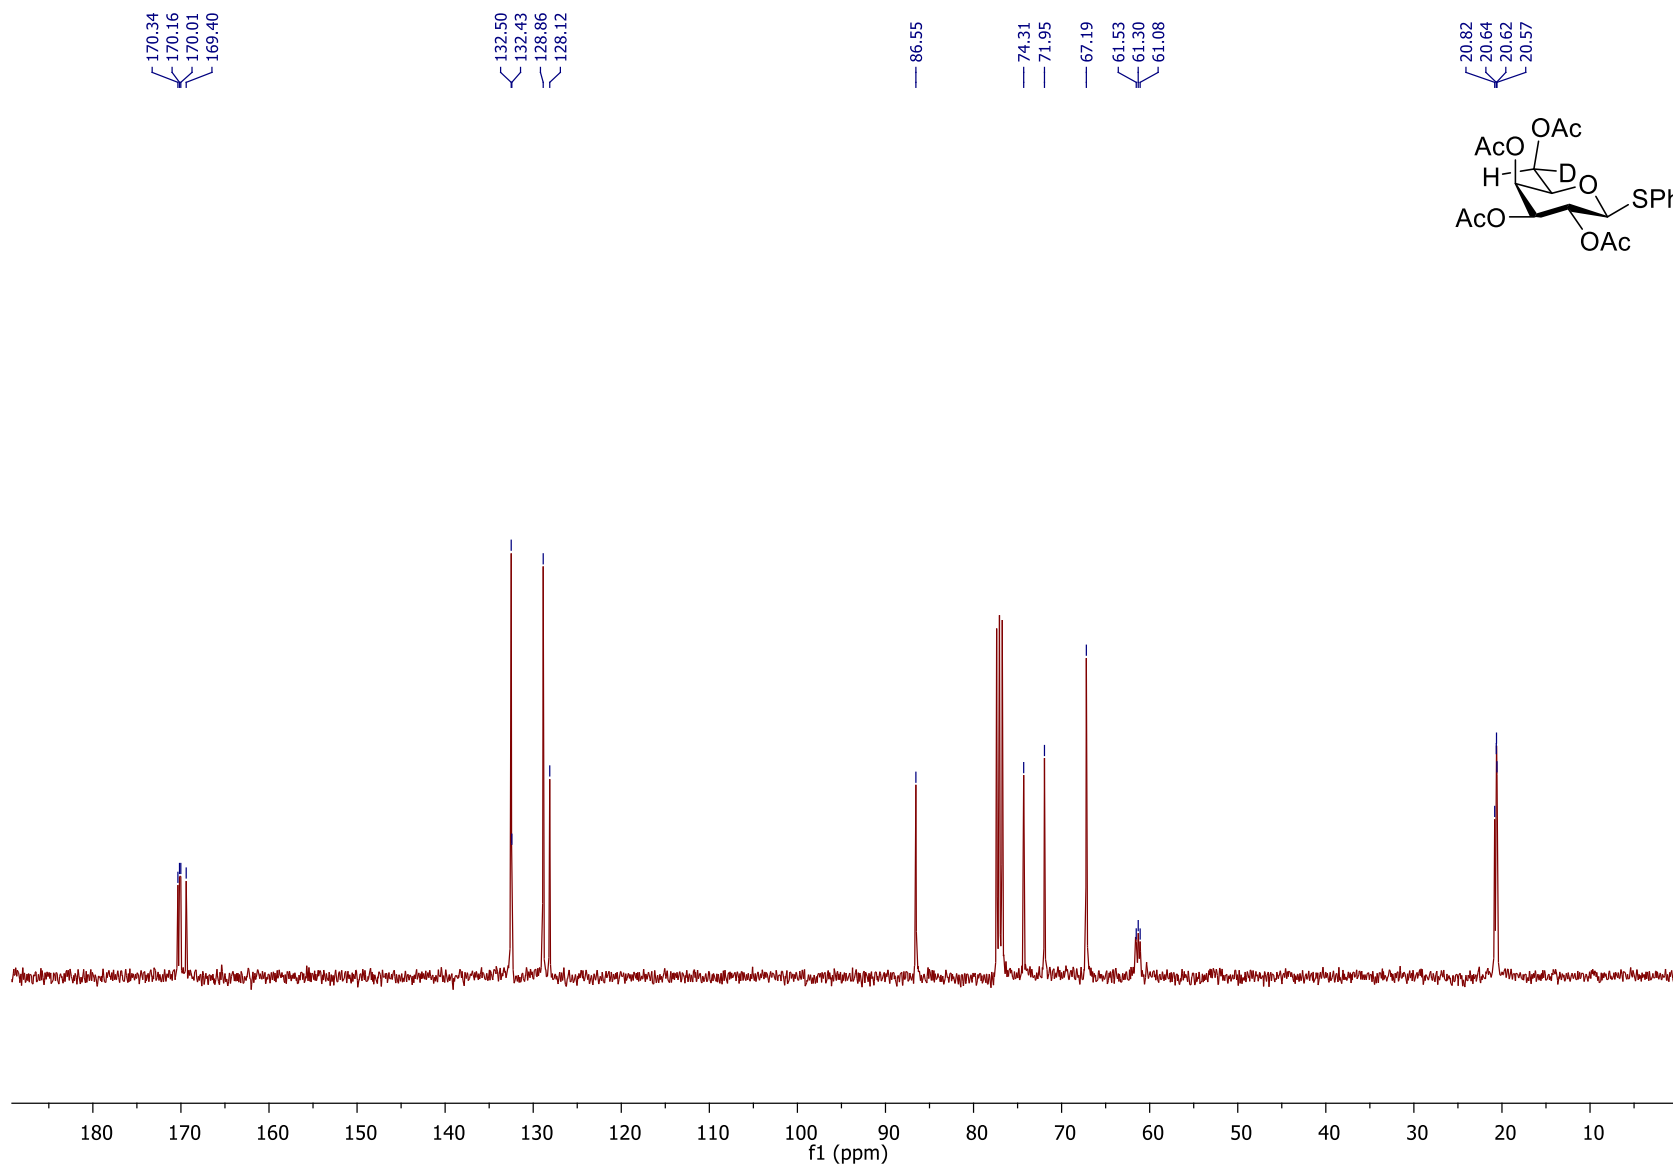

$^1\text{H}$  NMR (400 MHz,  $\text{CDCl}_3$ ) Spectrum of Phenyl 2,3-di-*O*-benzyl-4,6-*O*-benzylidene-(6*S*)-[6- $^2\text{H}_1$ ]-1-thio- $\beta$ -D-galactopyranoside (**10**)

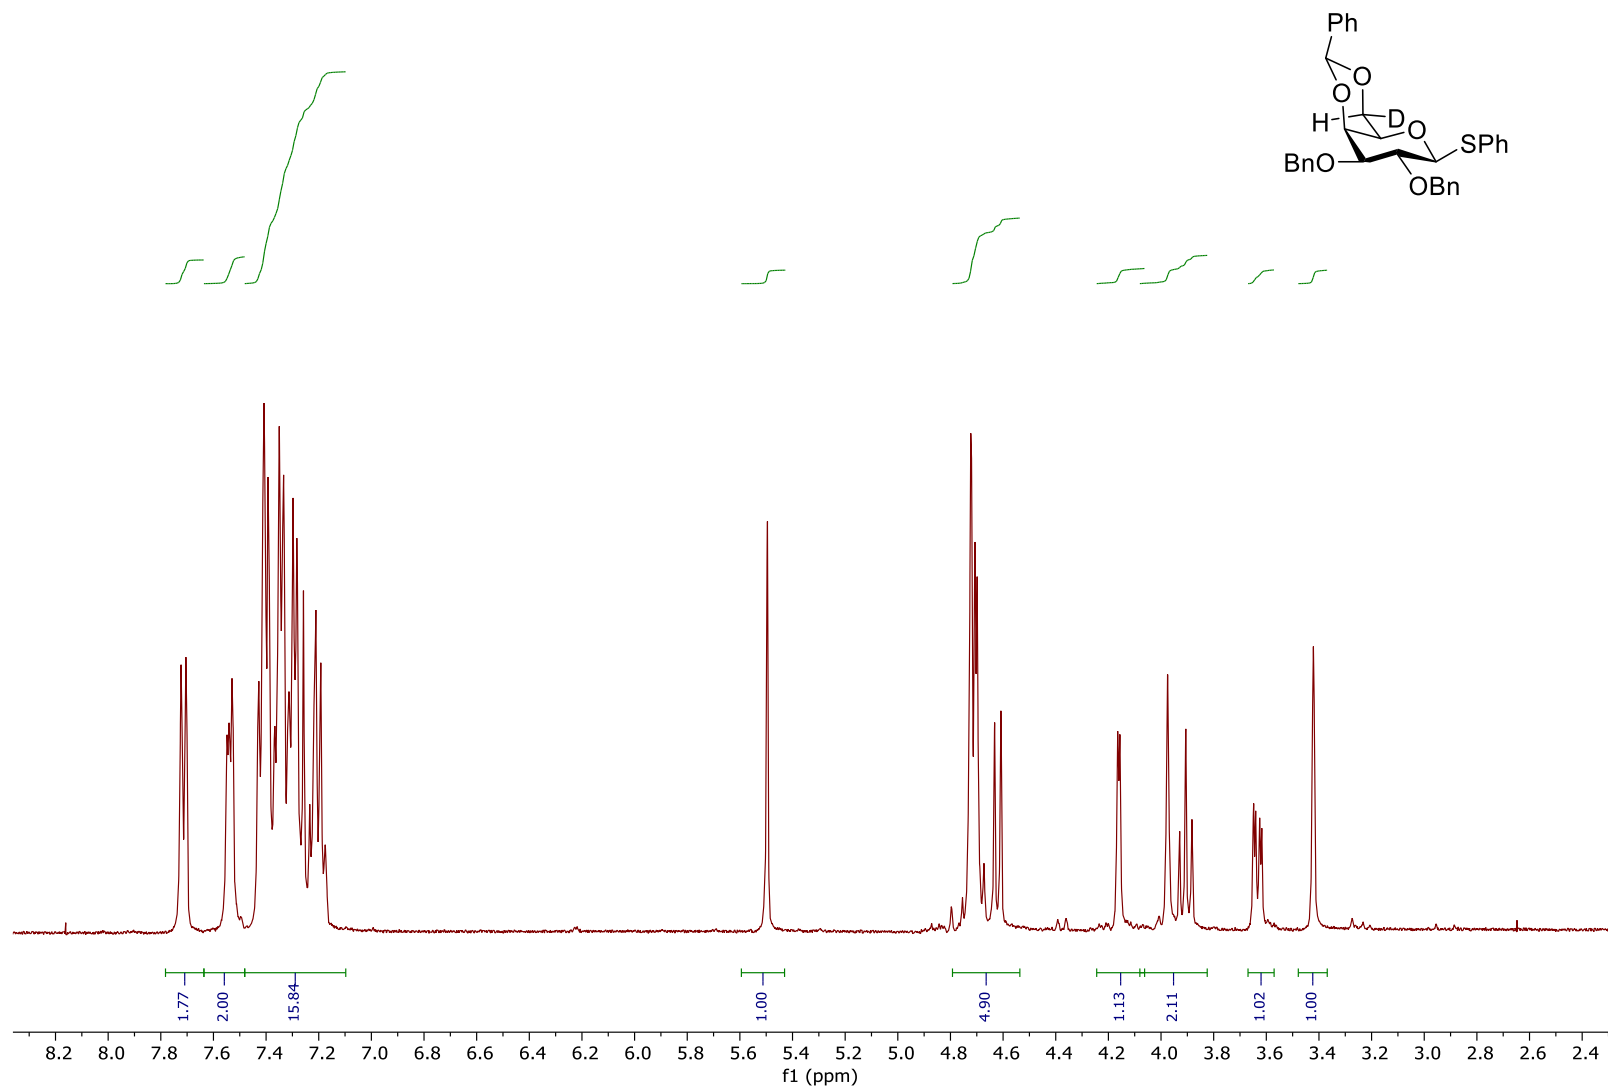

$^{13}\text{C}$  NMR (150 MHz,  $\text{CDCl}_3$ ) Spectrum of Phenyl 2,3-di-*O*-benzyl-4,6-*O*-benzylidene-(6*S*)-[6- $^2\text{H}_1$ ]-1-thio- $\beta$ -D-galactopyranoside (**10**)

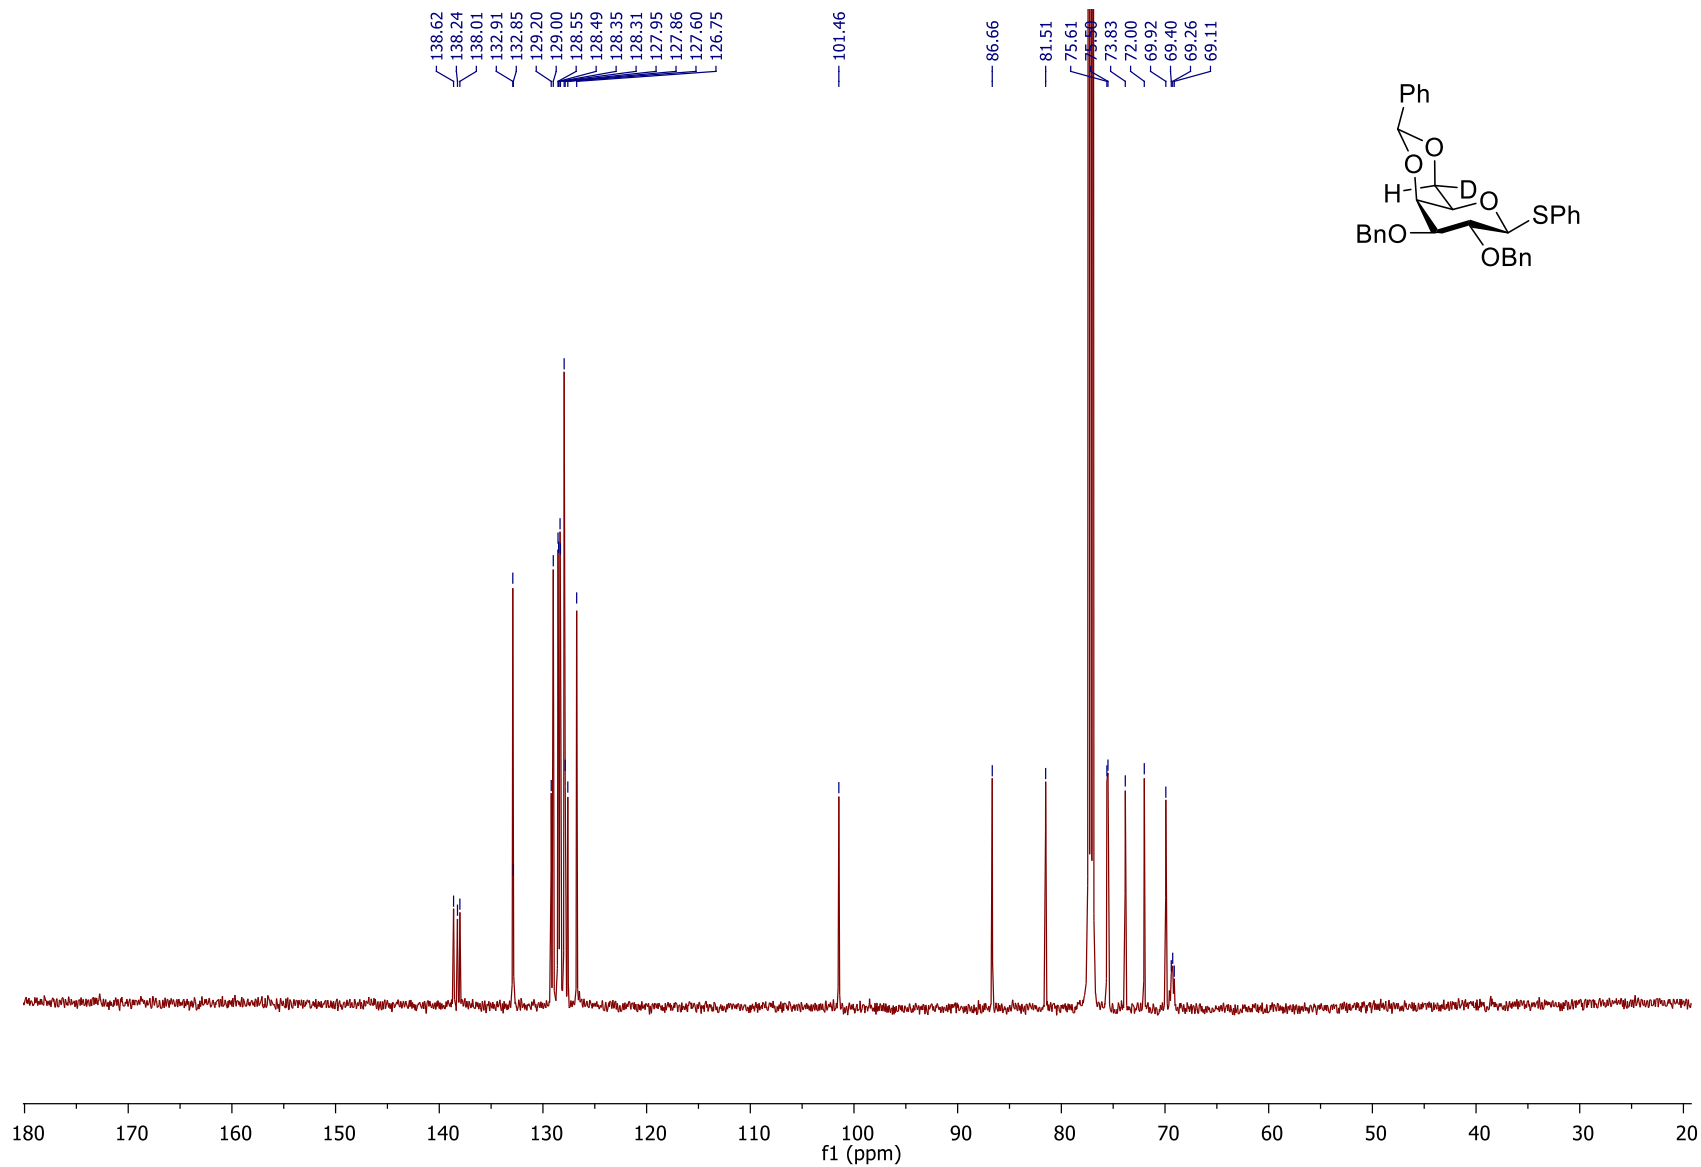

$^1\text{H}$  NMR (400 MHz,  $\text{CDCl}_3$ ) Spectrum of Ethyl -(6S)-[6- $^2\text{H}_1$ ]-2,3,4,6-tetra-O-acetyl-1-thio- $\beta$ -D-glucopyranoside (**12**)

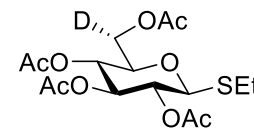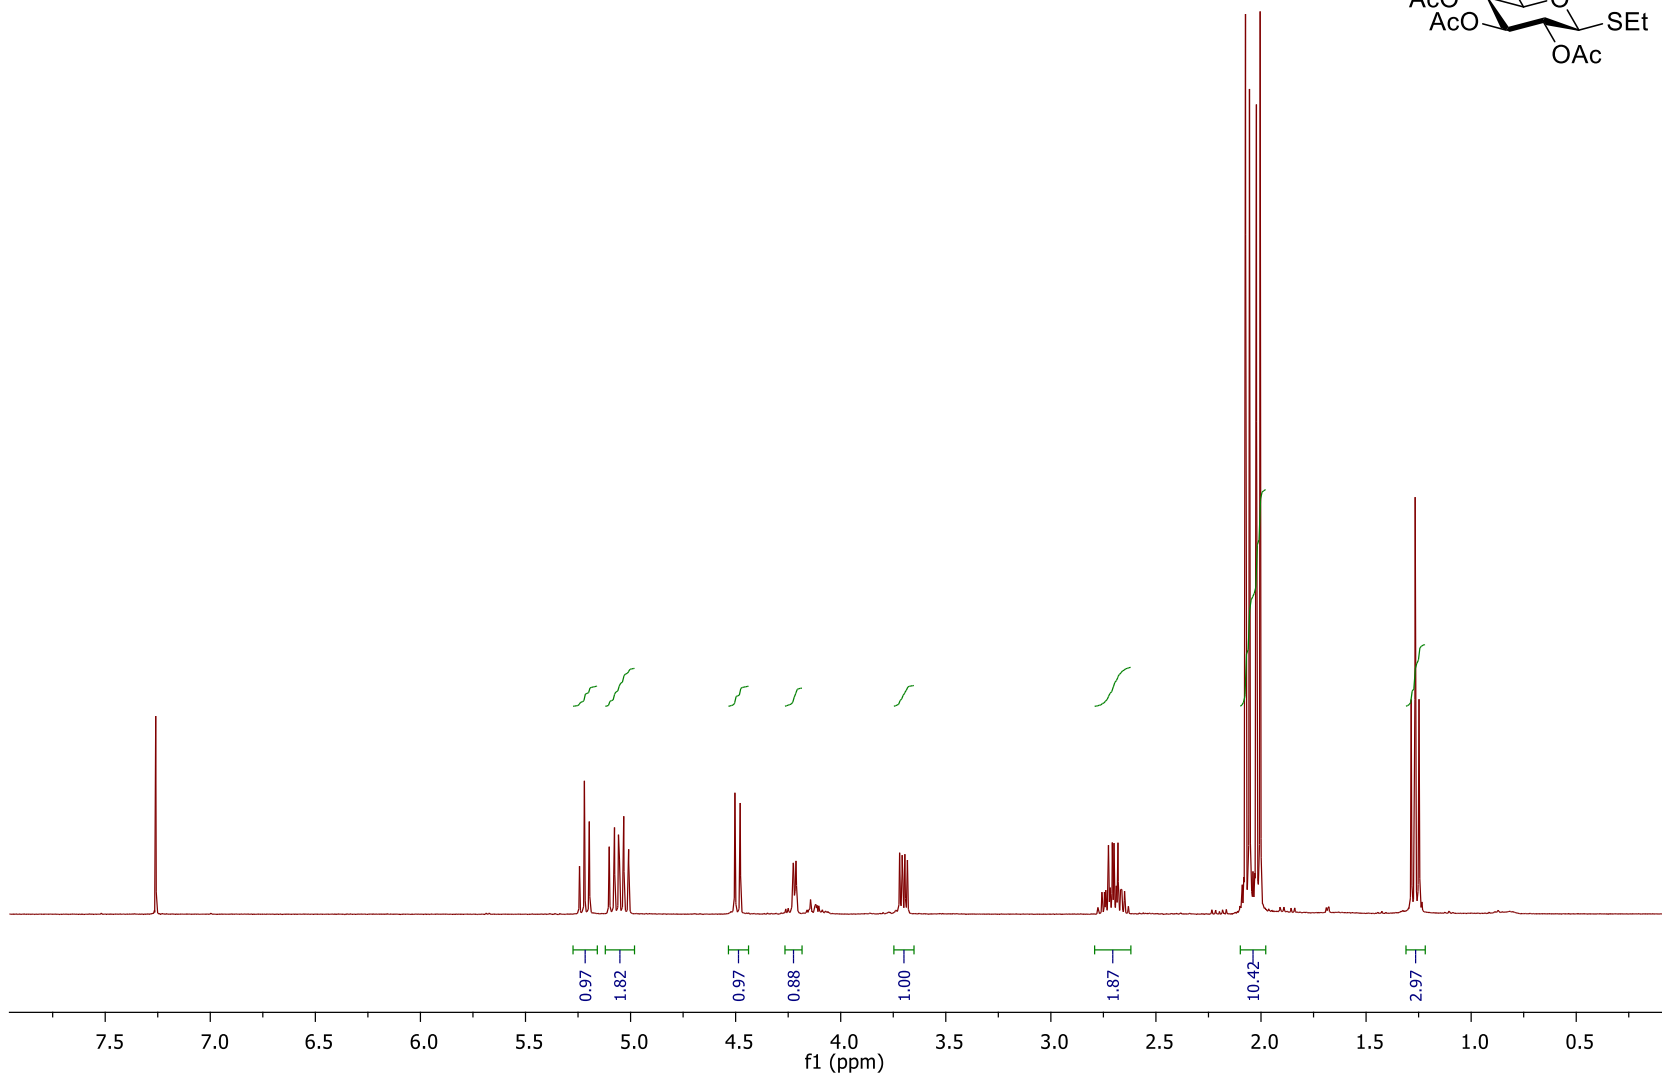



$^{13}\text{C}$  NMR (100 MHz,  $\text{CDCl}_3$ ) Spectrum of Ethyl -(6*S*)-[6- $^2\text{H}_1$ ]-2,3,4,6-tetra-*O*-acetyl-1-thio- $\beta$ -D-glucopyranoside (**12**)

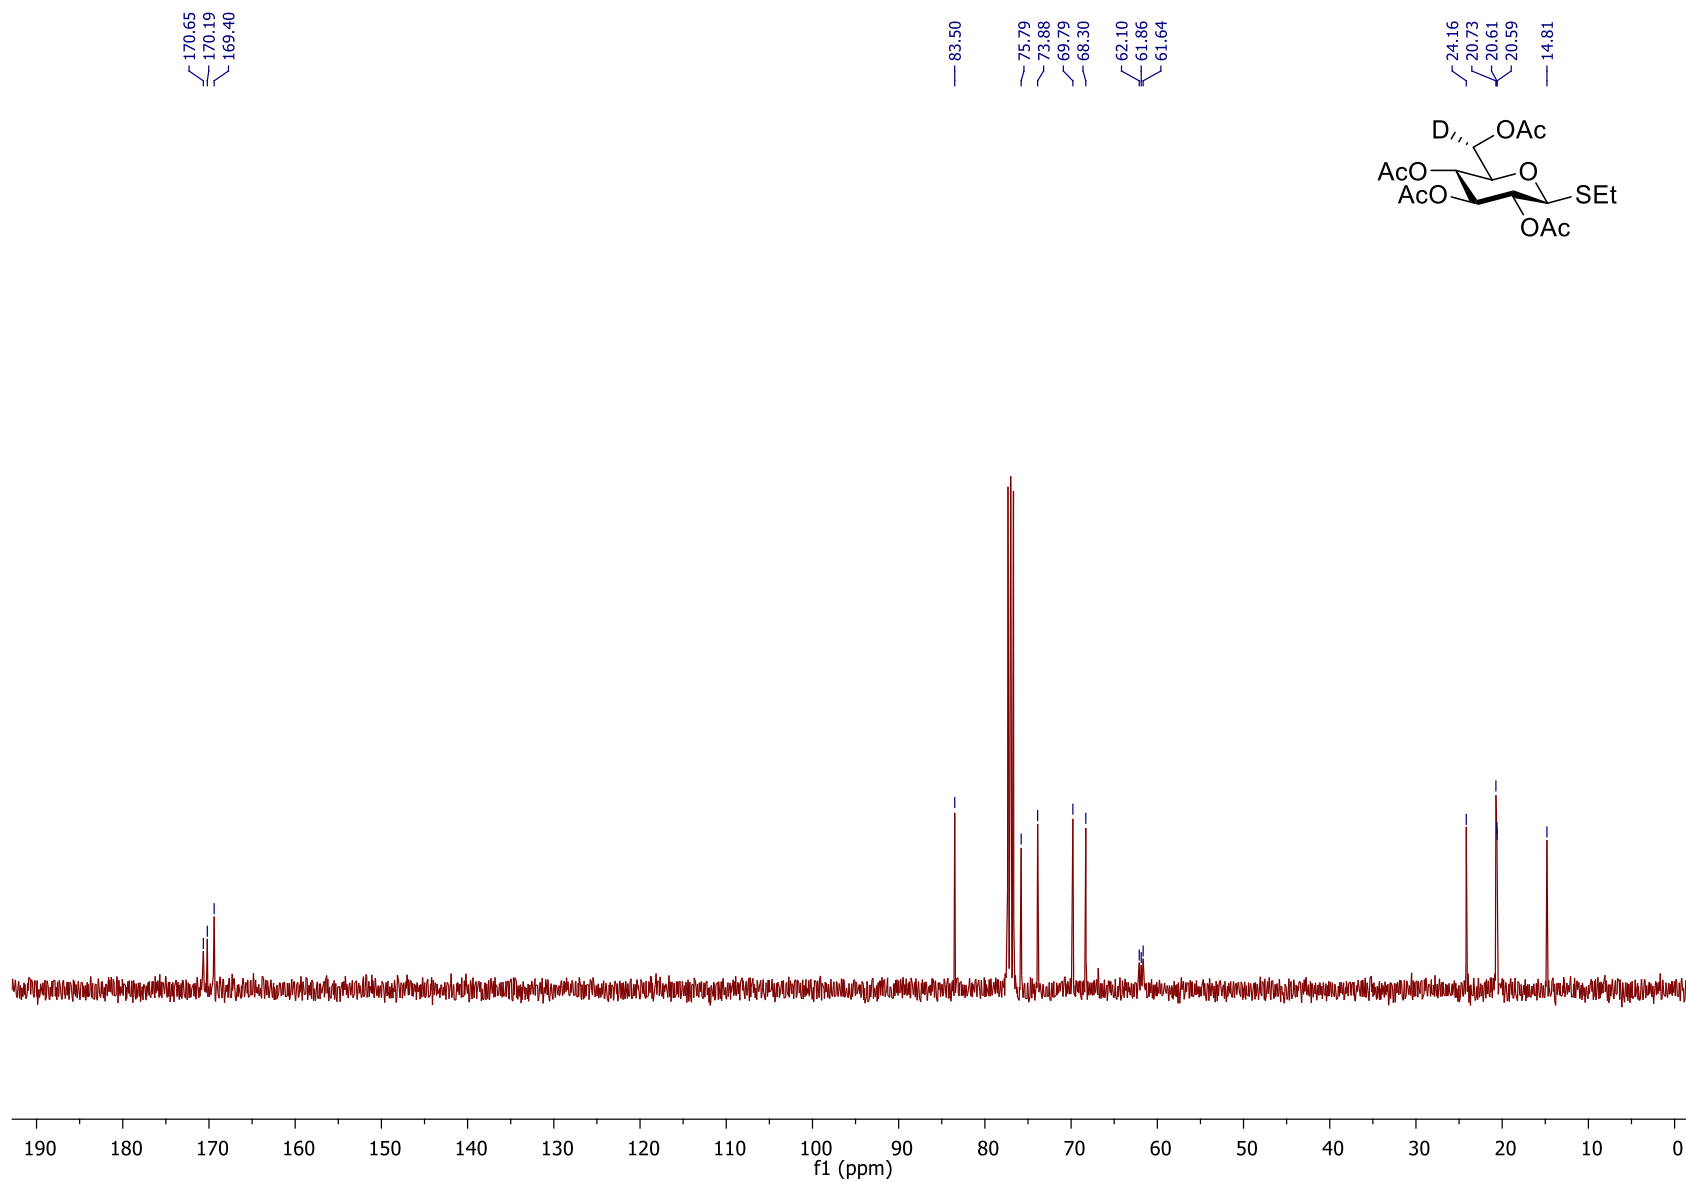

$^1\text{H}$  NMR (600 MHz,  $\text{CDCl}_3$ ) Spectrum of Phenyl 4-*O*-acetyl-2,3,6-tri-*O*-benzyl-1-thio- $\beta$ -D-galactopyranoside (**13**)

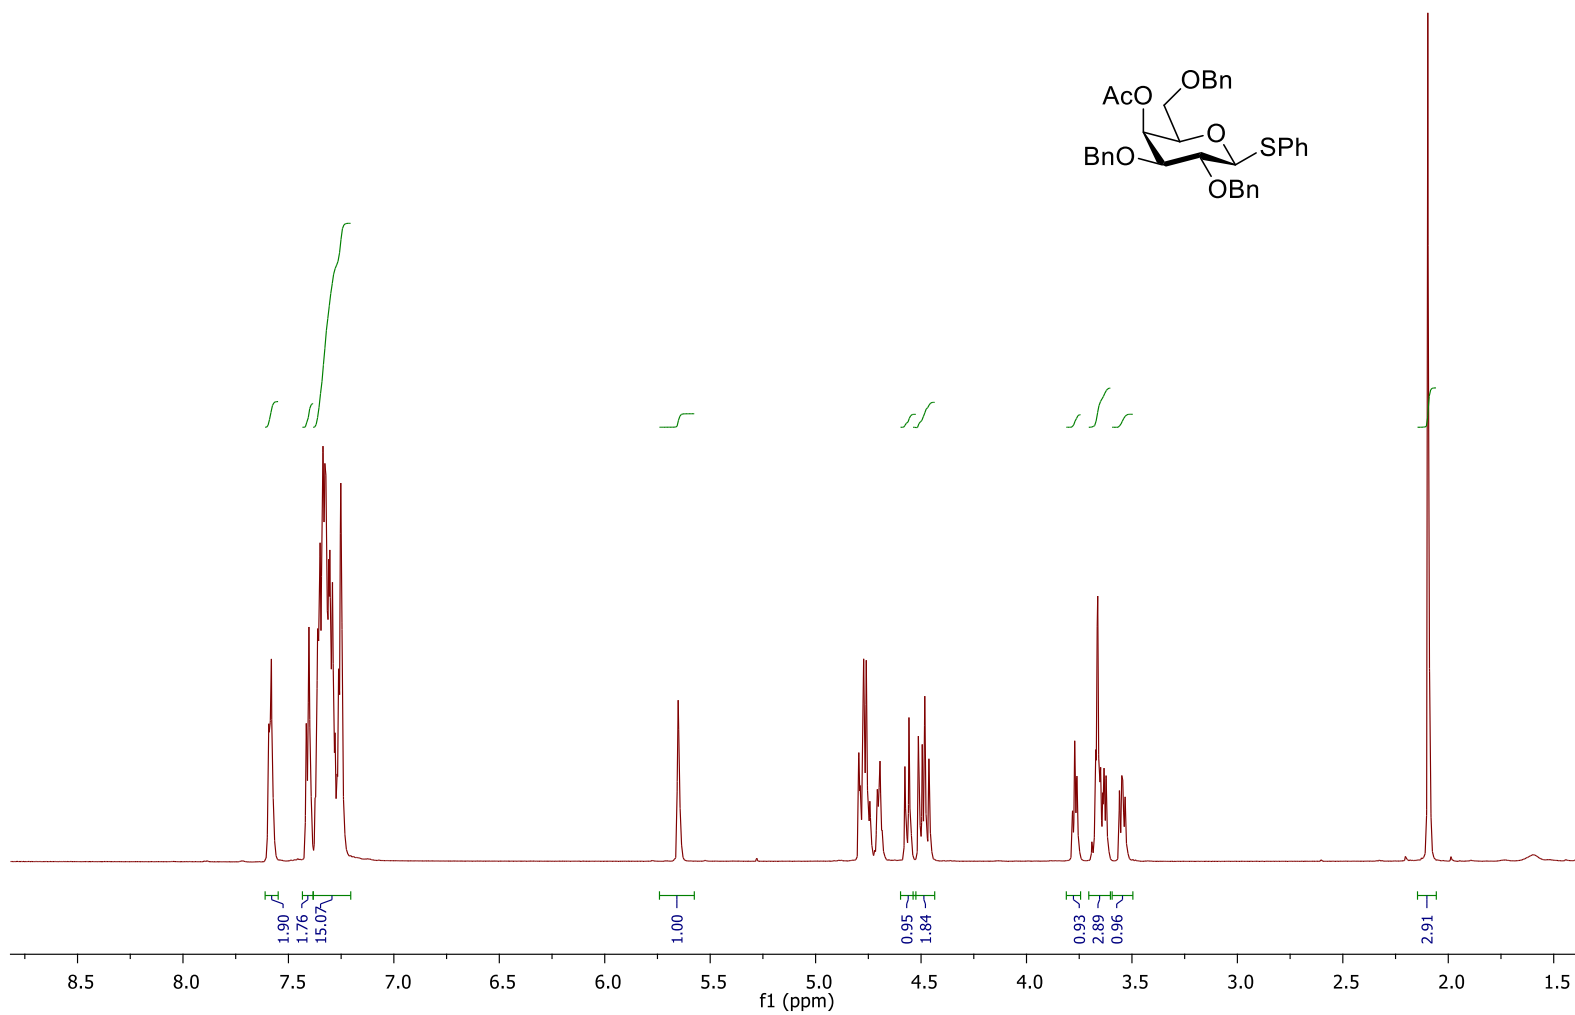

$^1\text{H}$  NMR (600 MHz,  $\text{C}_6\text{D}_6$ ) Spectrum of Phenyl 4-*O*-acetyl-2,3,6-tri-*O*-benzyl-1-thio- $\beta$ -D-galactopyranoside (**13**)

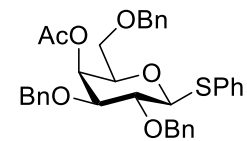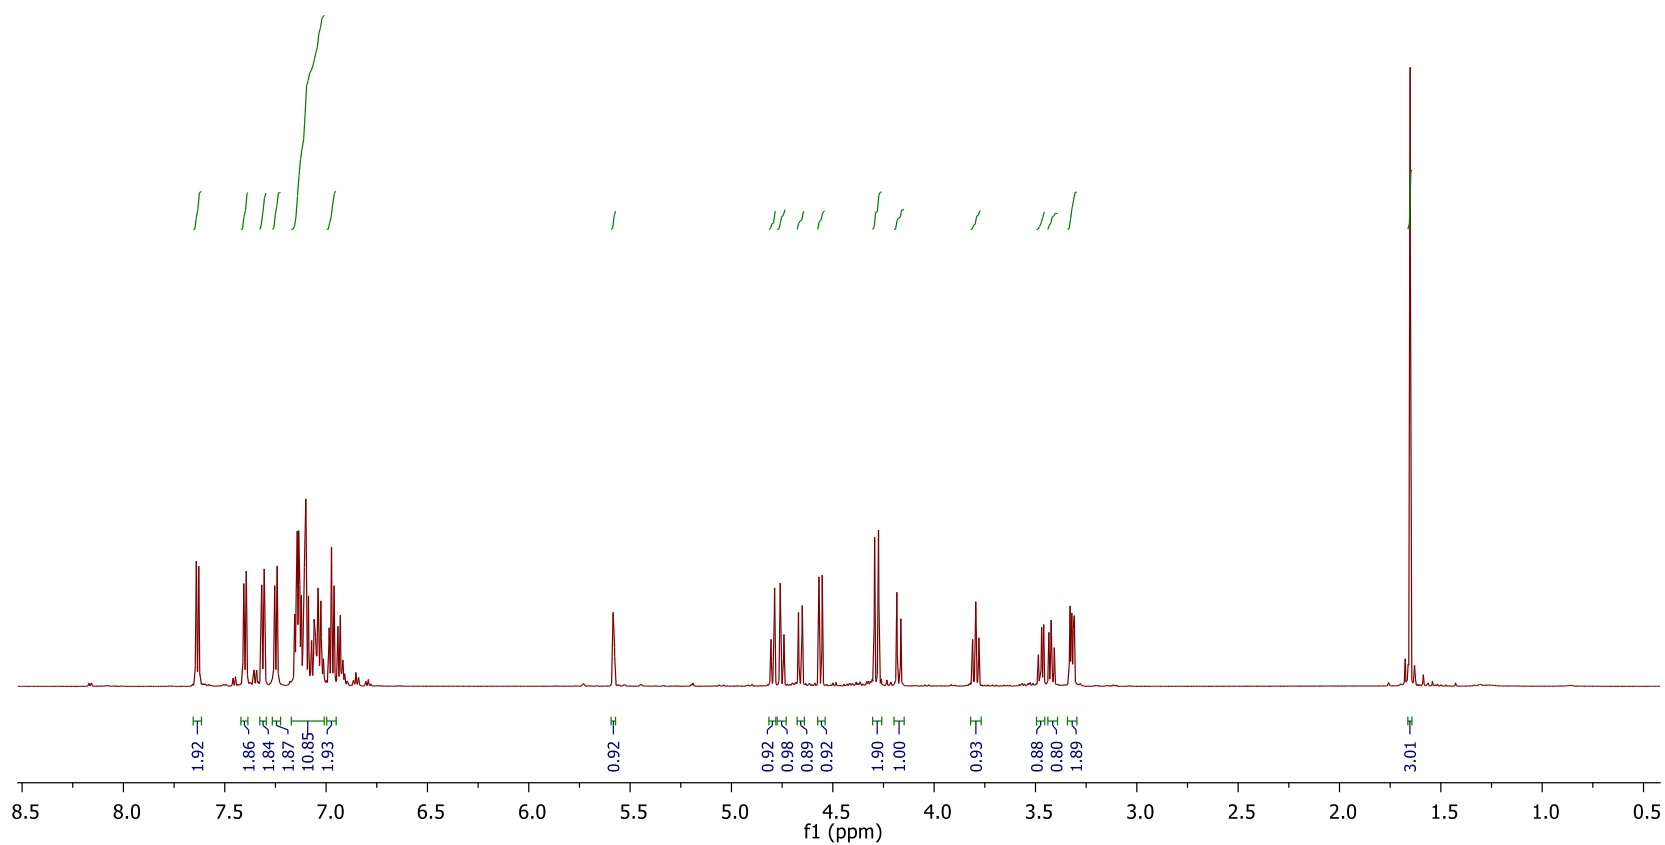

<sup>1</sup>H NMR (600 MHz, CDCl<sub>3</sub>) Spectrum of Phenyl 4-*O*-acetyl-(6*S*)-[6-<sup>2</sup>H<sub>1</sub>]-2,3,6-tri-*O*-benzyl-1-thio-β-D-galactopyranoside (**6S-D-13**)

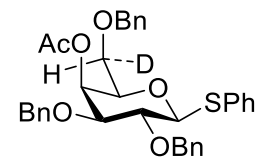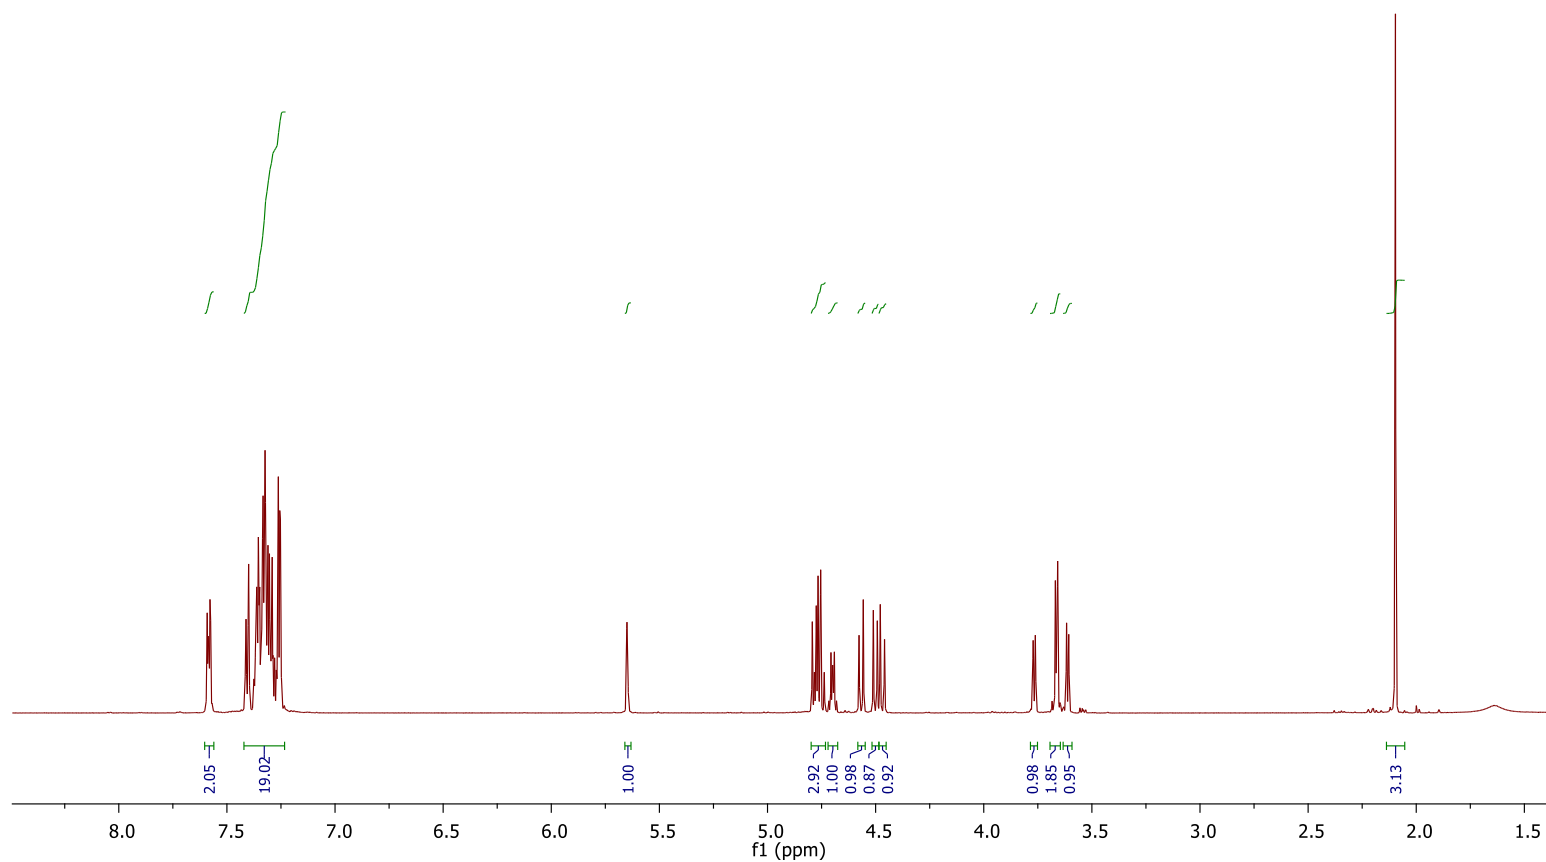

<sup>1</sup>H NMR (600 MHz, C<sub>6</sub>D<sub>6</sub>) Spectrum of Phenyl 4-*O*-acetyl-(6*S*)-[6-<sup>2</sup>H<sub>1</sub>]-2,3,6-tri-*O*-benzyl-1-thio-β-D-galactopyranoside (**6S-D-13**)

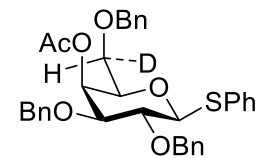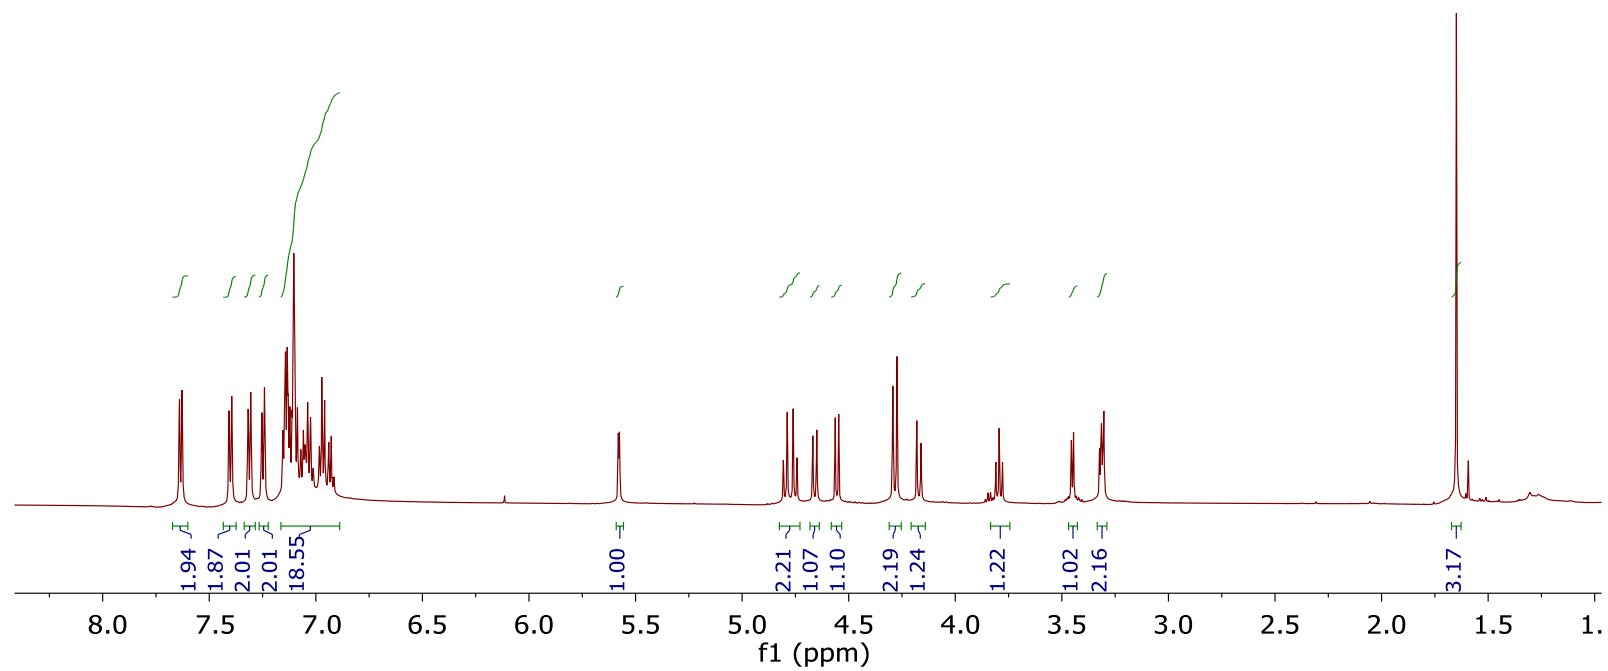

<sup>1</sup>H NMR (600 MHz, CDCl<sub>3</sub>) Spectrum of Phenyl 4-*O*-pivaloyl-2,3,6-tri-*O*-benzyl-1-thio-β-D-galactopyranoside (**14**)

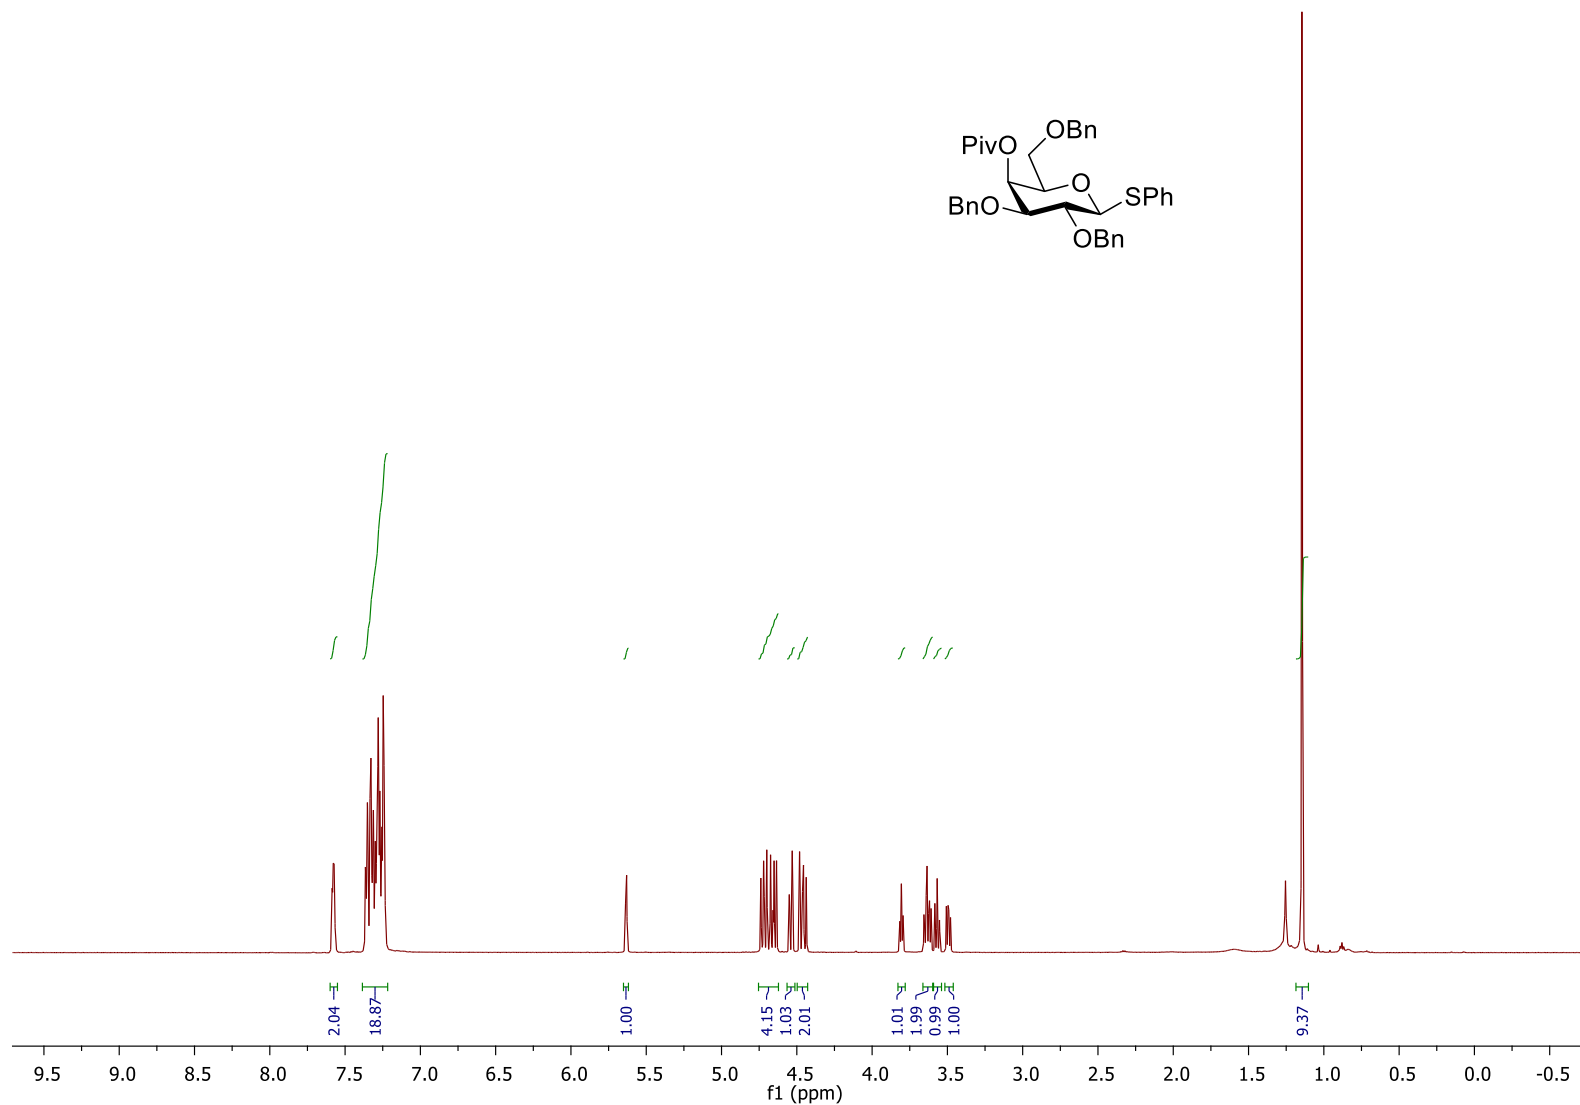

$^{13}\text{C}$  NMR (150 MHz,  $\text{CDCl}_3$ ) Spectrum of Phenyl 4-*O*-pivaloyl-2,3,6-tri-*O*-benzyl-1-thio- $\beta$ -D-galactopyranoside (**14**)

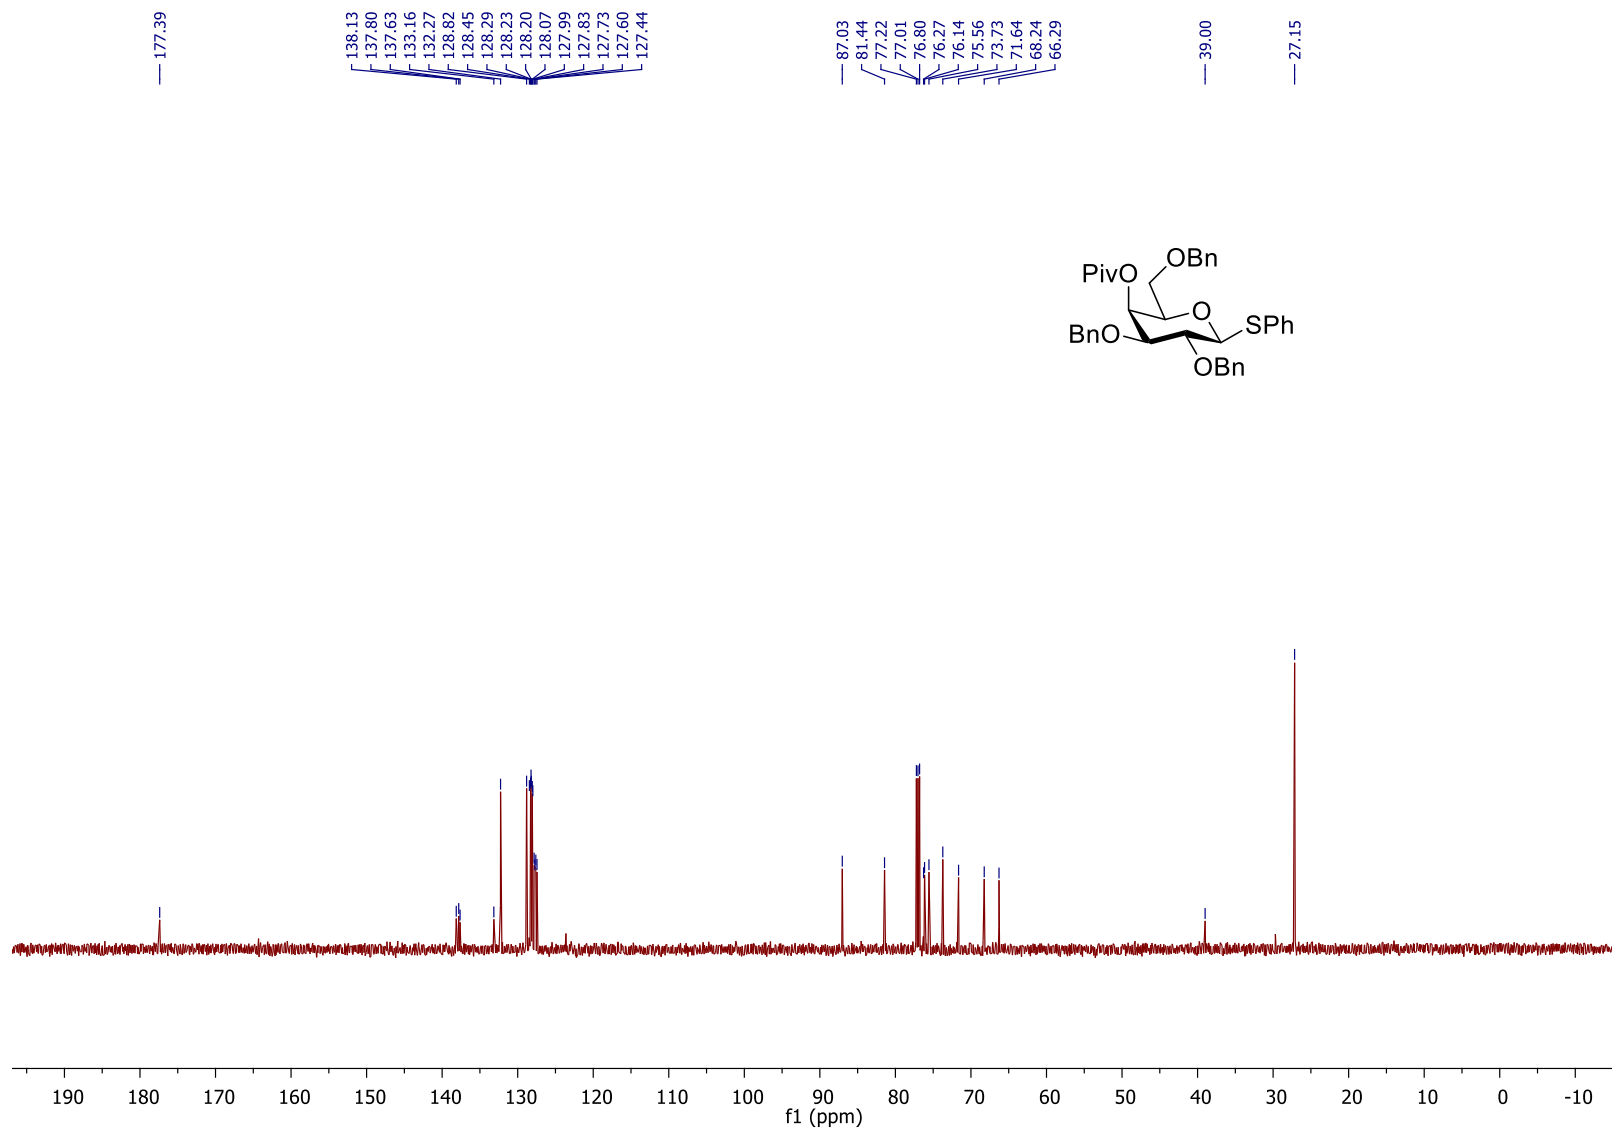

$^1\text{H}$  NMR (600 MHz,  $\text{C}_6\text{D}_6$ ) Spectrum of Phenyl 4-*O*-pivaloyl-2,3,6-tri-*O*-benzyl-1-thio- $\beta$ -D-galactopyranoside (**14**)

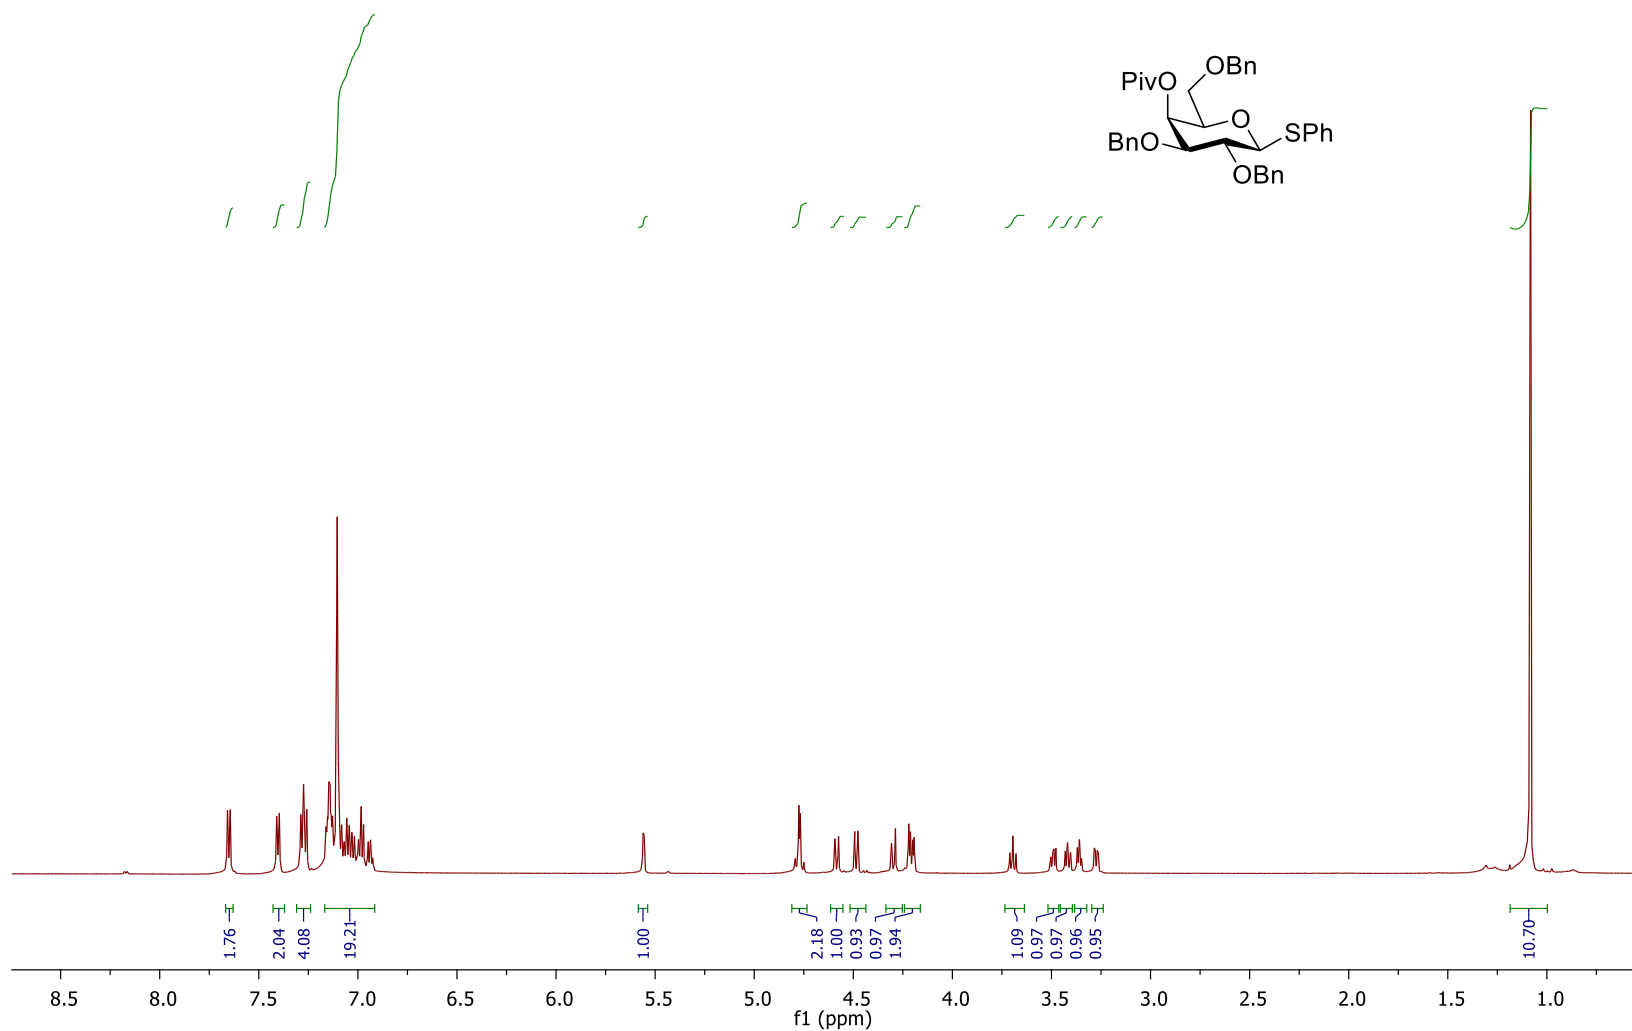



<sup>1</sup>H NMR (600 MHz, CDCl<sub>3</sub>) Spectrum of Phenyl 4-*O*-pivaloyl-(6*S*)-[6-<sup>2</sup>H<sub>1</sub>]-2,3,6-tri-*O*-benzyl-1-thio-β-D-galactopyranoside (**6S-D-14**)

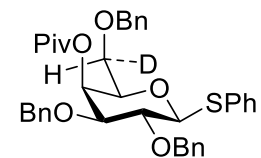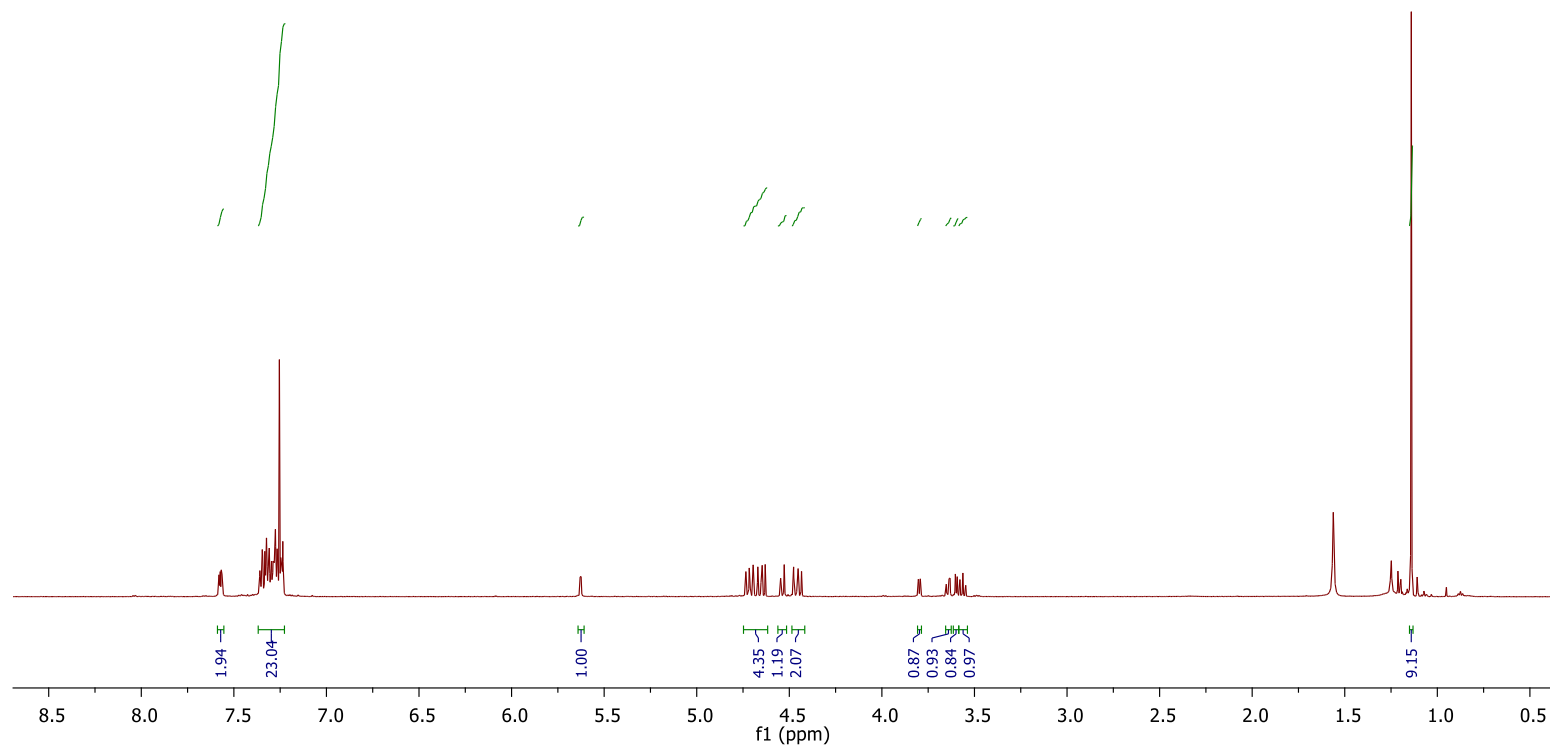

$^1\text{H}$  NMR (600 MHz,  $\text{C}_6\text{D}_6$ ) Spectrum of Phenyl 4-*O*-pivaloyl-(6*S*)-[6- $^2\text{H}_1$ ]-2,3,6-tri-*O*-benzyl-1-thio- $\beta$ -D-galactopyranoside (**6S-D-14**)

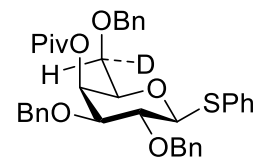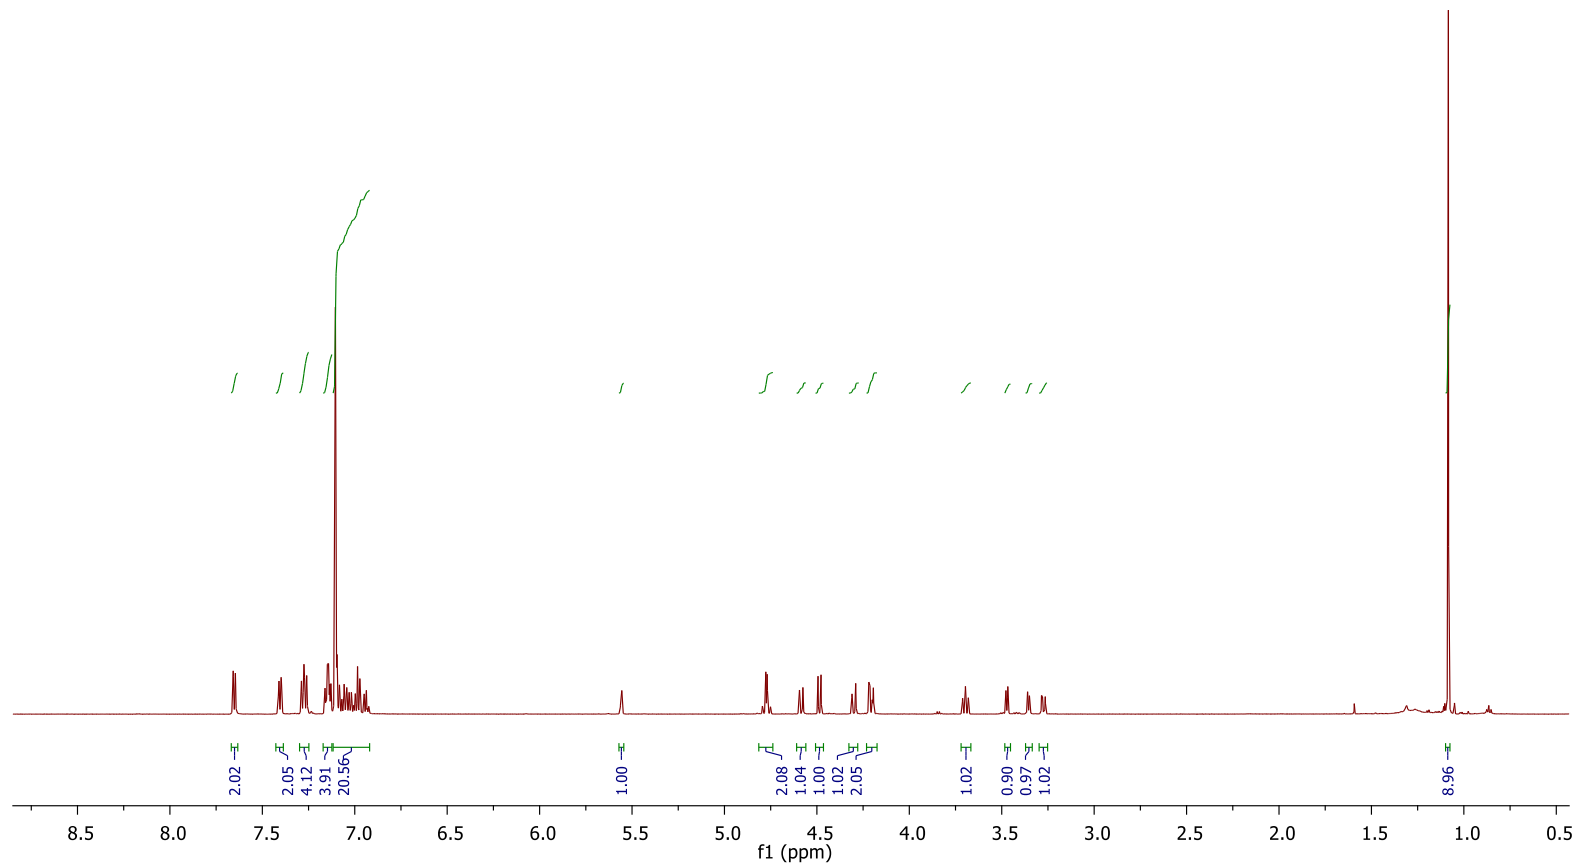

<sup>1</sup>H NMR (600 MHz, CDCl<sub>3</sub>) Spectrum of Phenyl 2,3,6-tri-*O*-benzyl-4-*O*-trifluoroacetyl -1-thio-β-D-galactopyranoside (**15**)

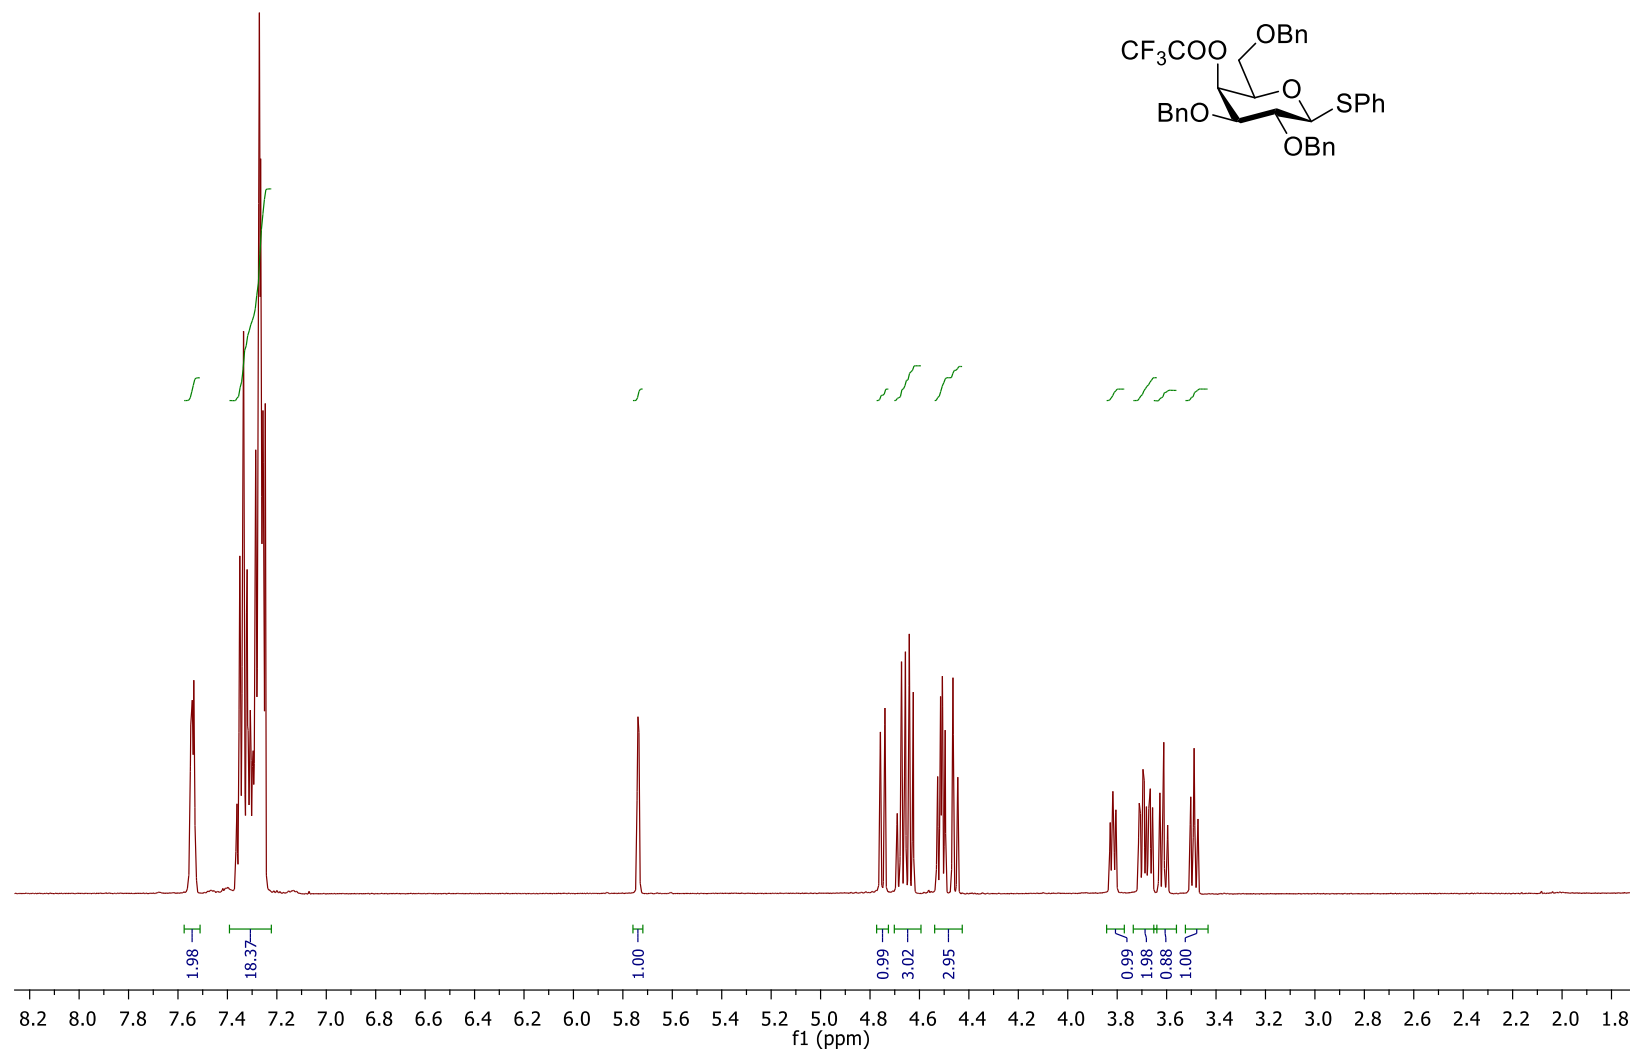

$^{13}\text{C}$  NMR (150 MHz,  $\text{CDCl}_3$ ) Spectrum of Phenyl 2,3,6-tri-*O*-benzyl-4-*O*-trifluoroacetyl -1-thio- $\beta$ -D-galactopyranoside (**15**)

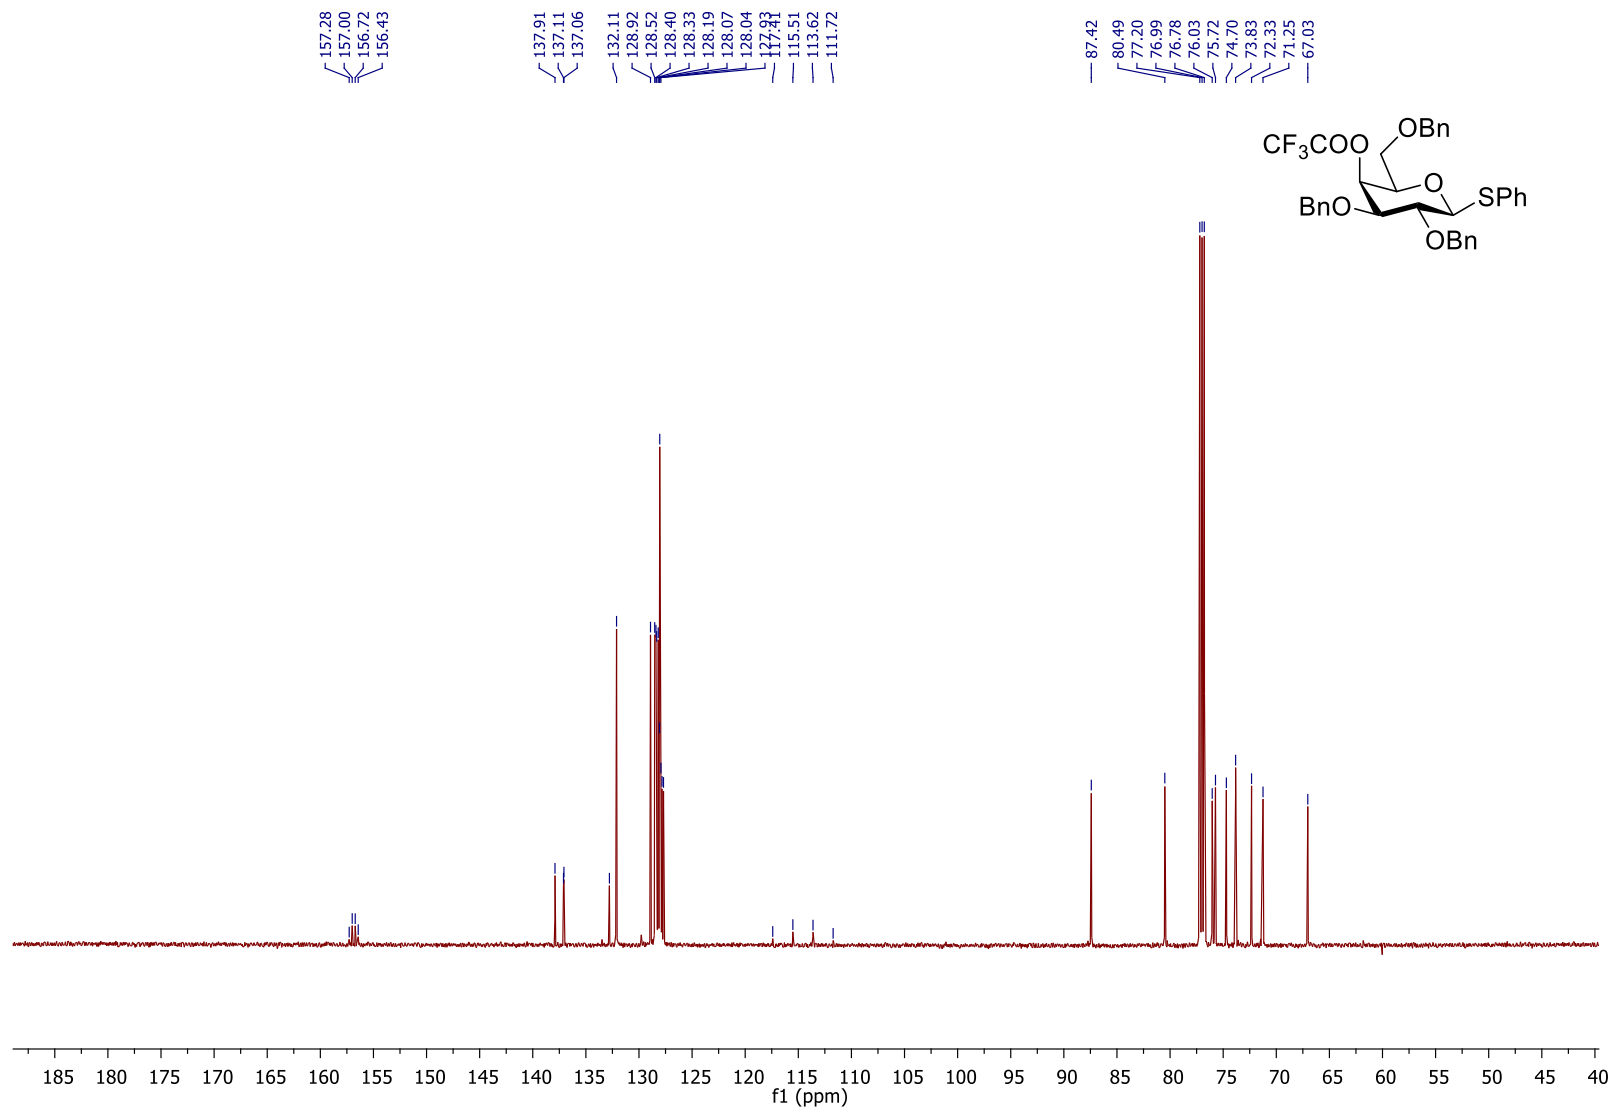

$^{19}\text{F}$  NMR (375 MHz,  $\text{CDCl}_3$ ) Spectrum of Phenyl 2,3,6-tri-*O*-benzyl-4-*O*-trifluoroacetyl -1-thio- $\beta$ -D-galactopyranoside (**15**)

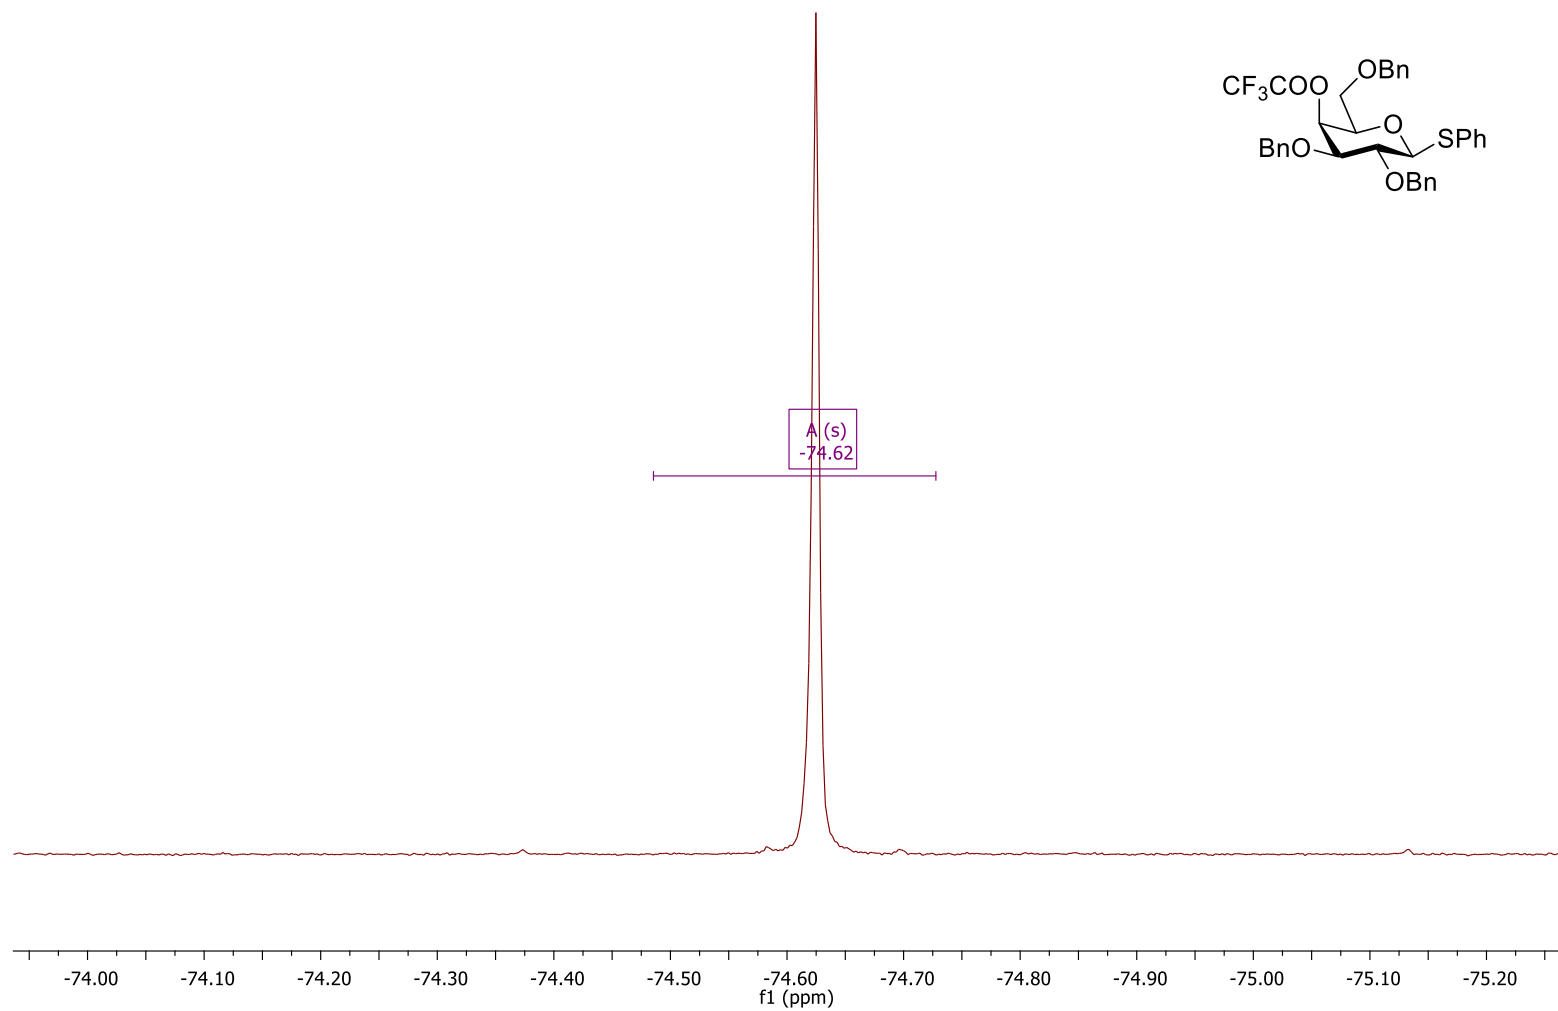

$^1\text{H}$  NMR (600 MHz,  $\text{C}_6\text{D}_6$ ) Spectrum of Phenyl 2,3,6-tri-*O*-benzyl-4-*O*-trifluoroacetyl -1-thio- $\beta$ -D-galactopyranoside (**15**)

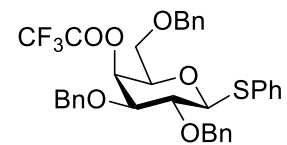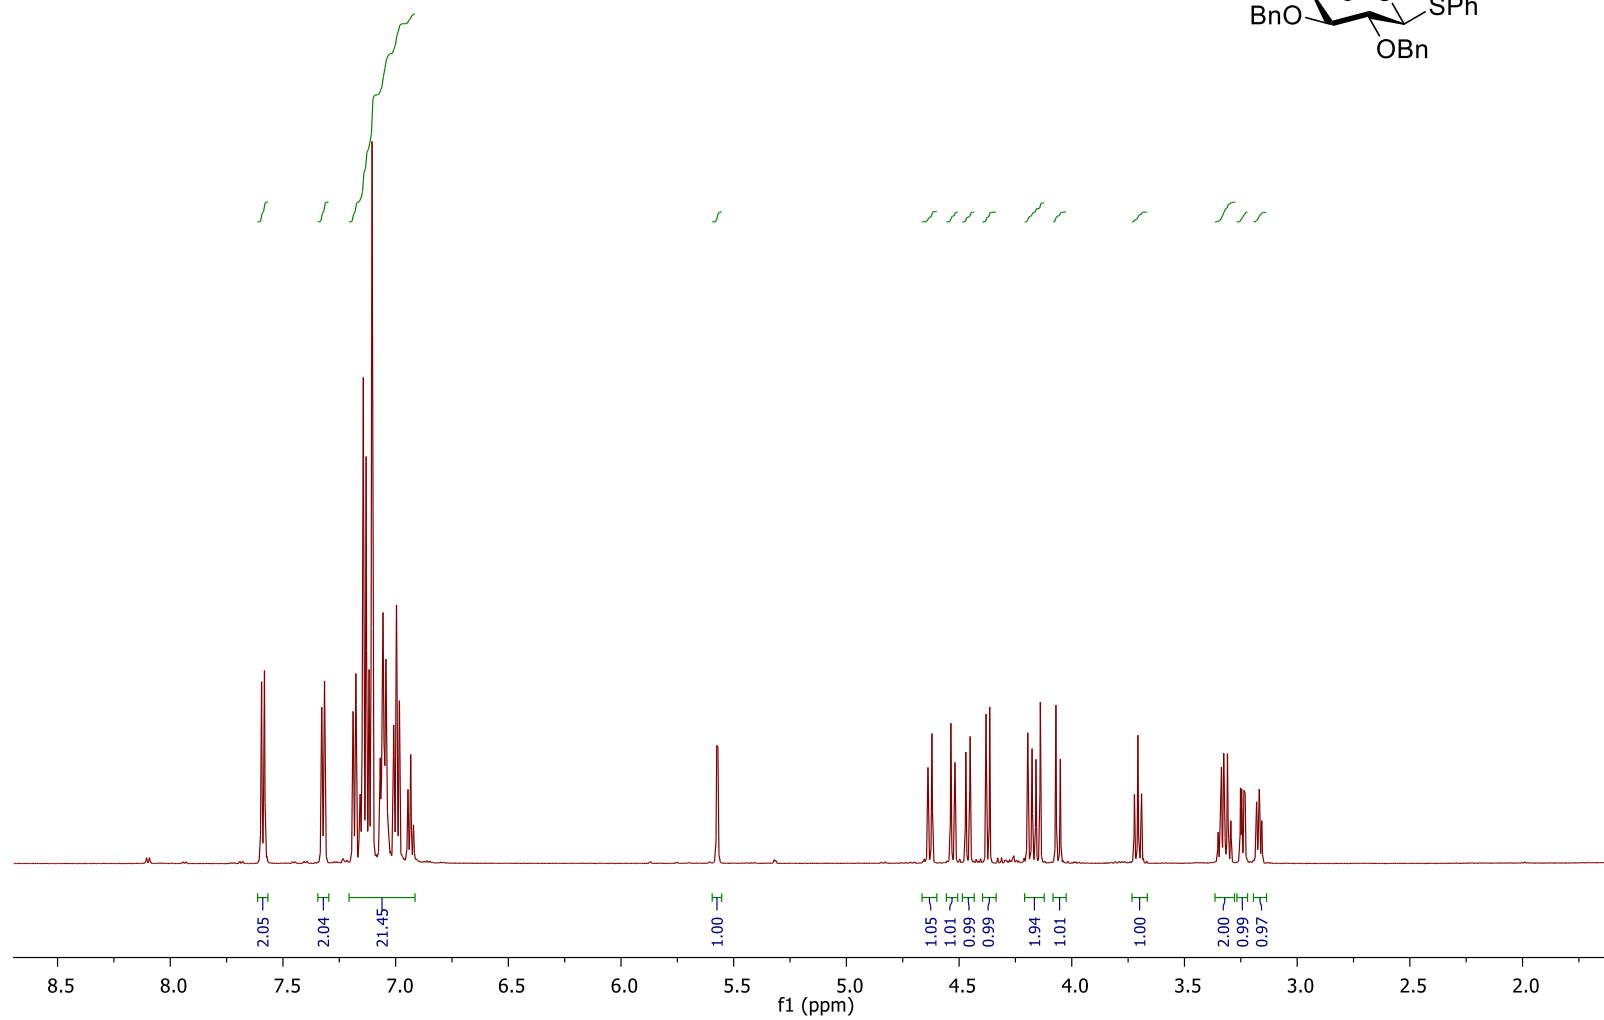

Simulated  $^1\text{H}$  NMR and  $^1\text{H}$  NMR (600 MHz,  $\text{C}_6\text{D}_6$ ) Spectrum of Phenyl 2,3,6-tri-*O*-benzyl-4-*O*-trifluoroacetyl -1-thio- $\beta$ -D-galactopyranoside (**15**)

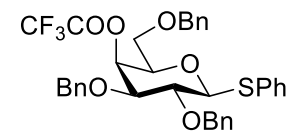

Experimental  $^1\text{H}$ -NMR (600 MHz,  $\text{C}_6\text{D}_6$ )

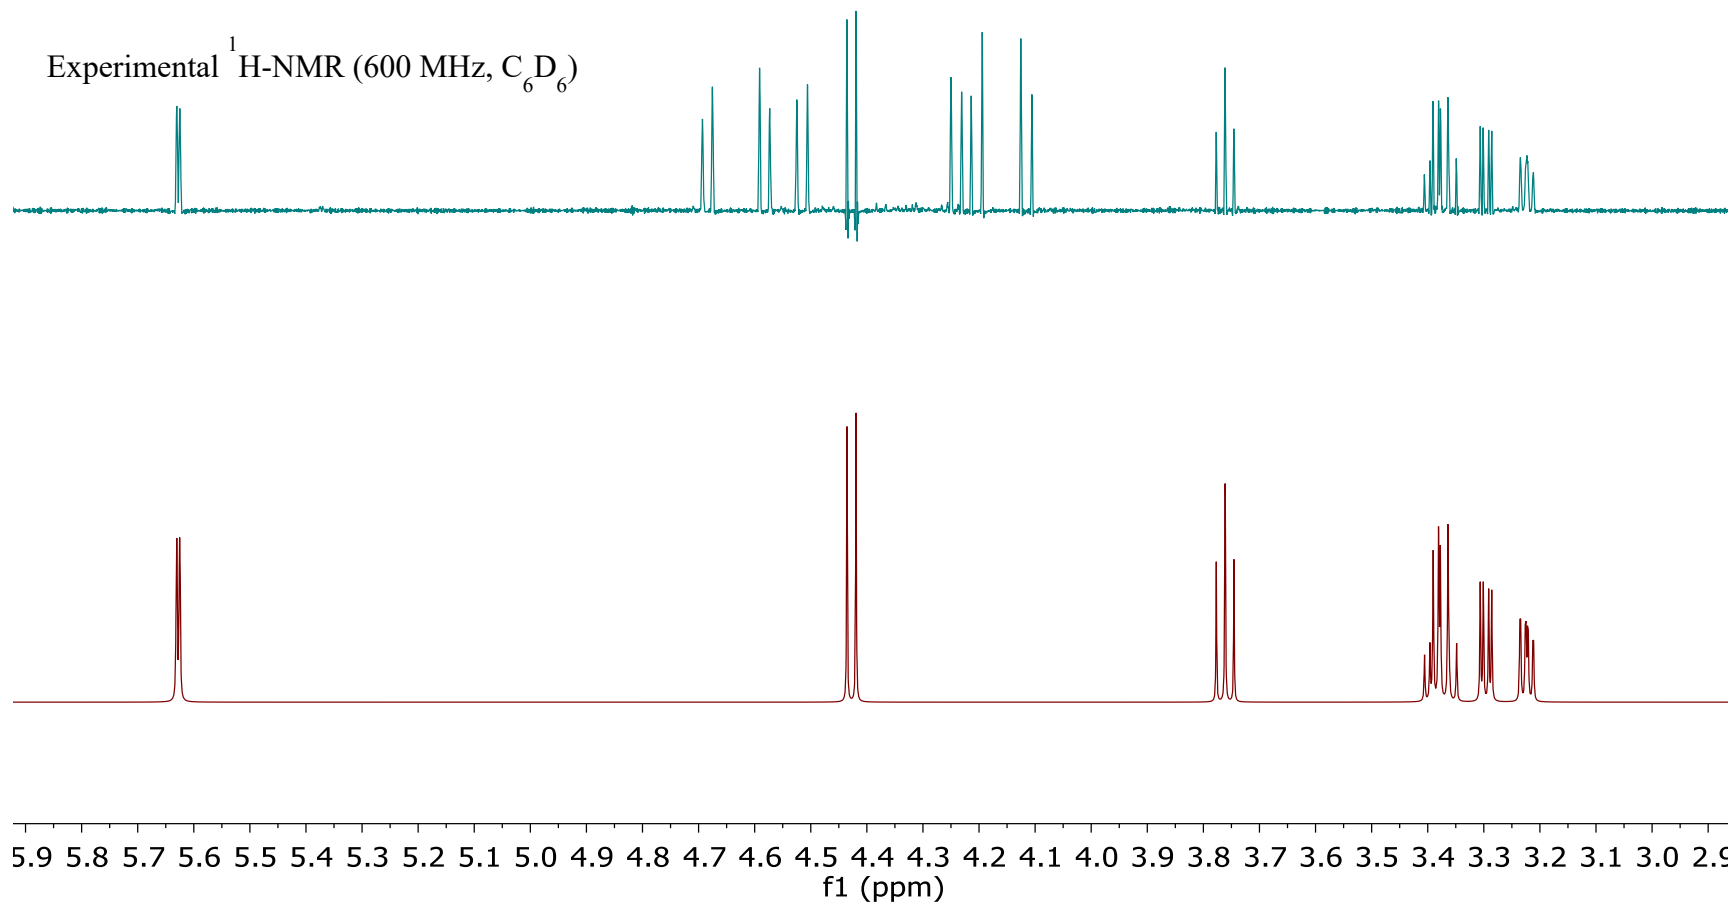

<sup>1</sup>H NMR (600 MHz, CDCl<sub>3</sub>) Spectrum of Phenyl 4-*O*-trifluoroacetyl-(6*S*)-[6-<sup>2</sup>H<sub>1</sub>]-2,3,6-tri-*O*-benzyl-1-thio-β-D-galactopyranoside  
(6*S*-D-15)

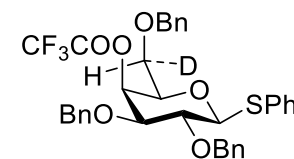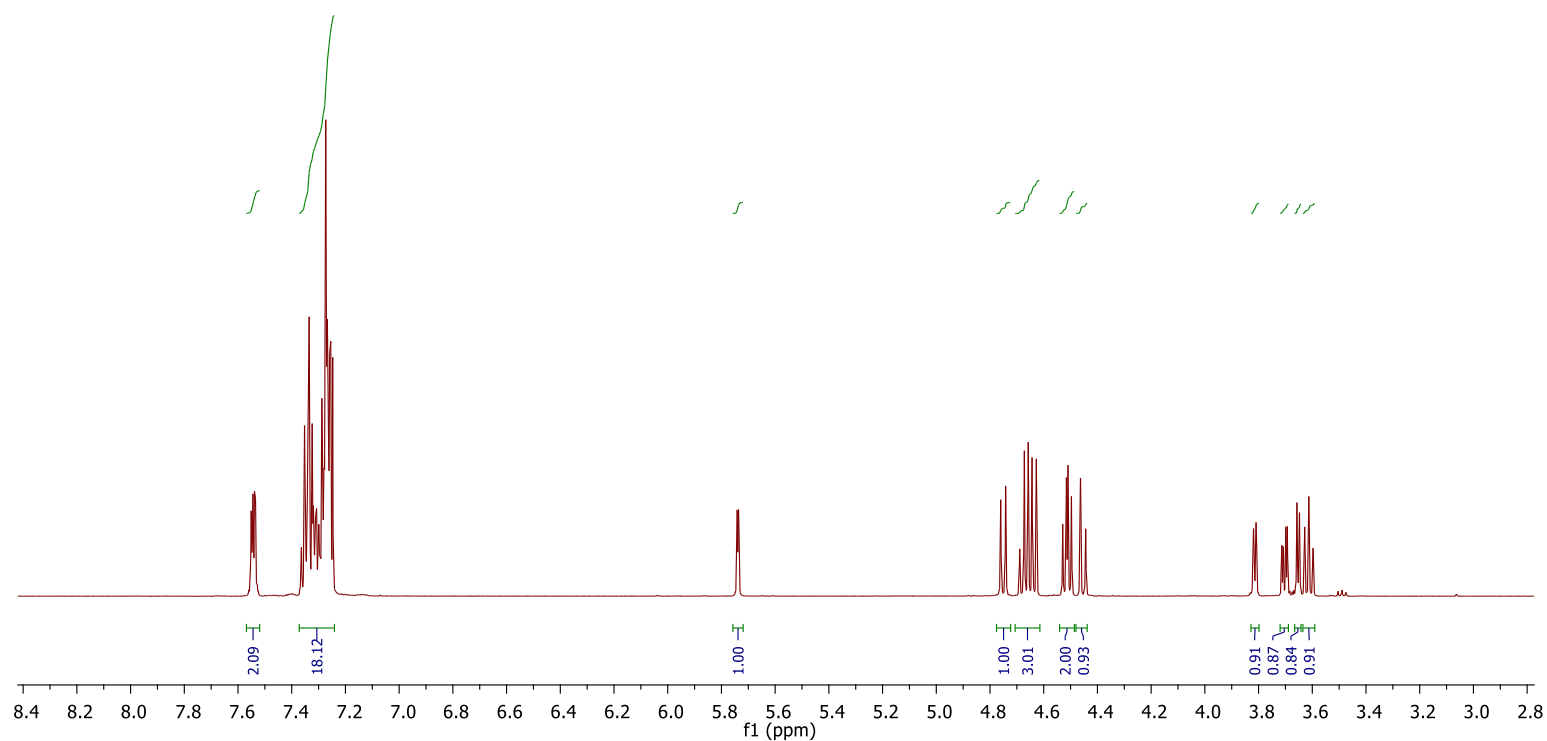



<sup>1</sup>H NMR (600 MHz, C<sub>6</sub>D<sub>6</sub>) Spectrum of Phenyl 4-*O*-trifluoroacetyl-(6*S*)-[6-<sup>2</sup>H<sub>1</sub>]-2,3,6-tri-*O*-benzyl-1-thio-β-D-galactopyranoside (**6S-D-15**)

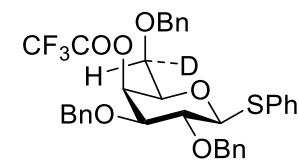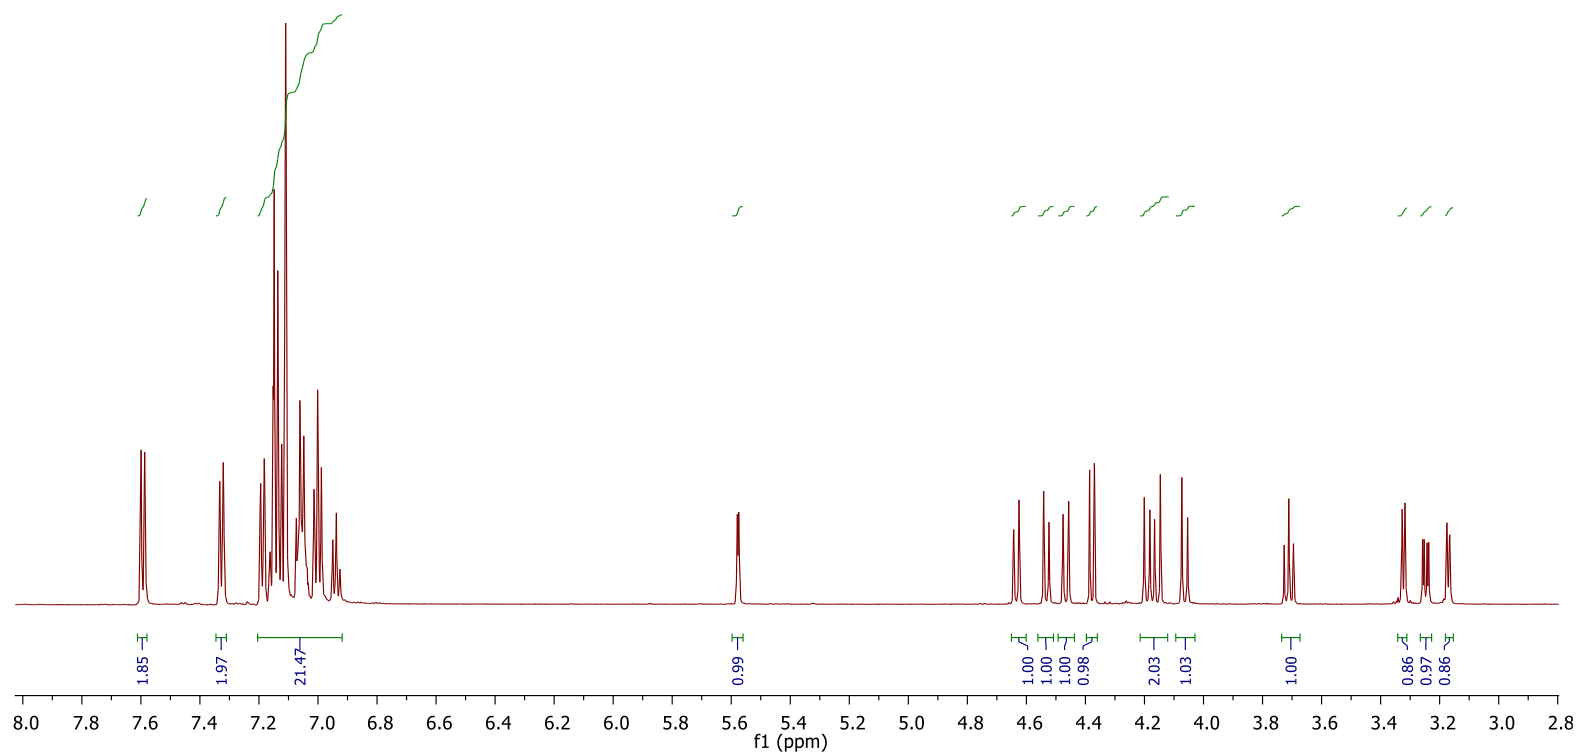

<sup>1</sup>H NMR (600 MHz, CDCl<sub>3</sub>) Spectrum of Phenyl 2,3,6-tri-*O*-benzyl-4-*O*-trichloroacetyl -1-thio-β-D-galactopyranoside (**16**)

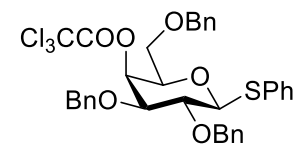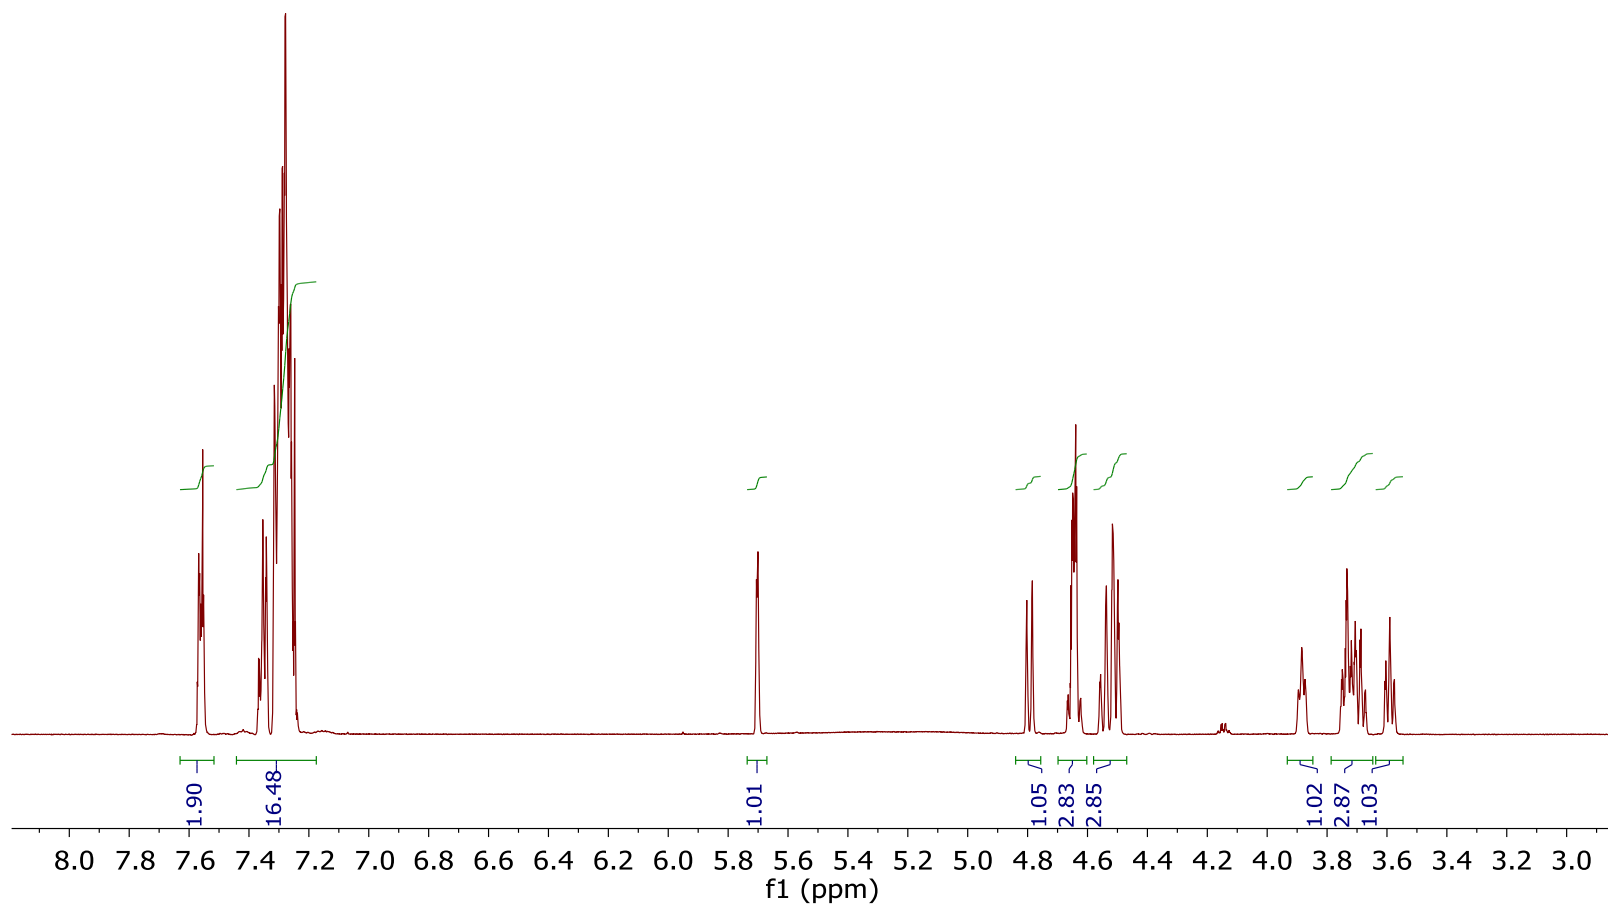

$^{13}\text{C}$  NMR (150 MHz,  $\text{CDCl}_3$ ) Spectrum of Phenyl 2,3,6-tri-*O*-benzyl-4-*O*-trichloroacetyl -1-thio- $\beta$ -D-galactopyranoside (**16**)

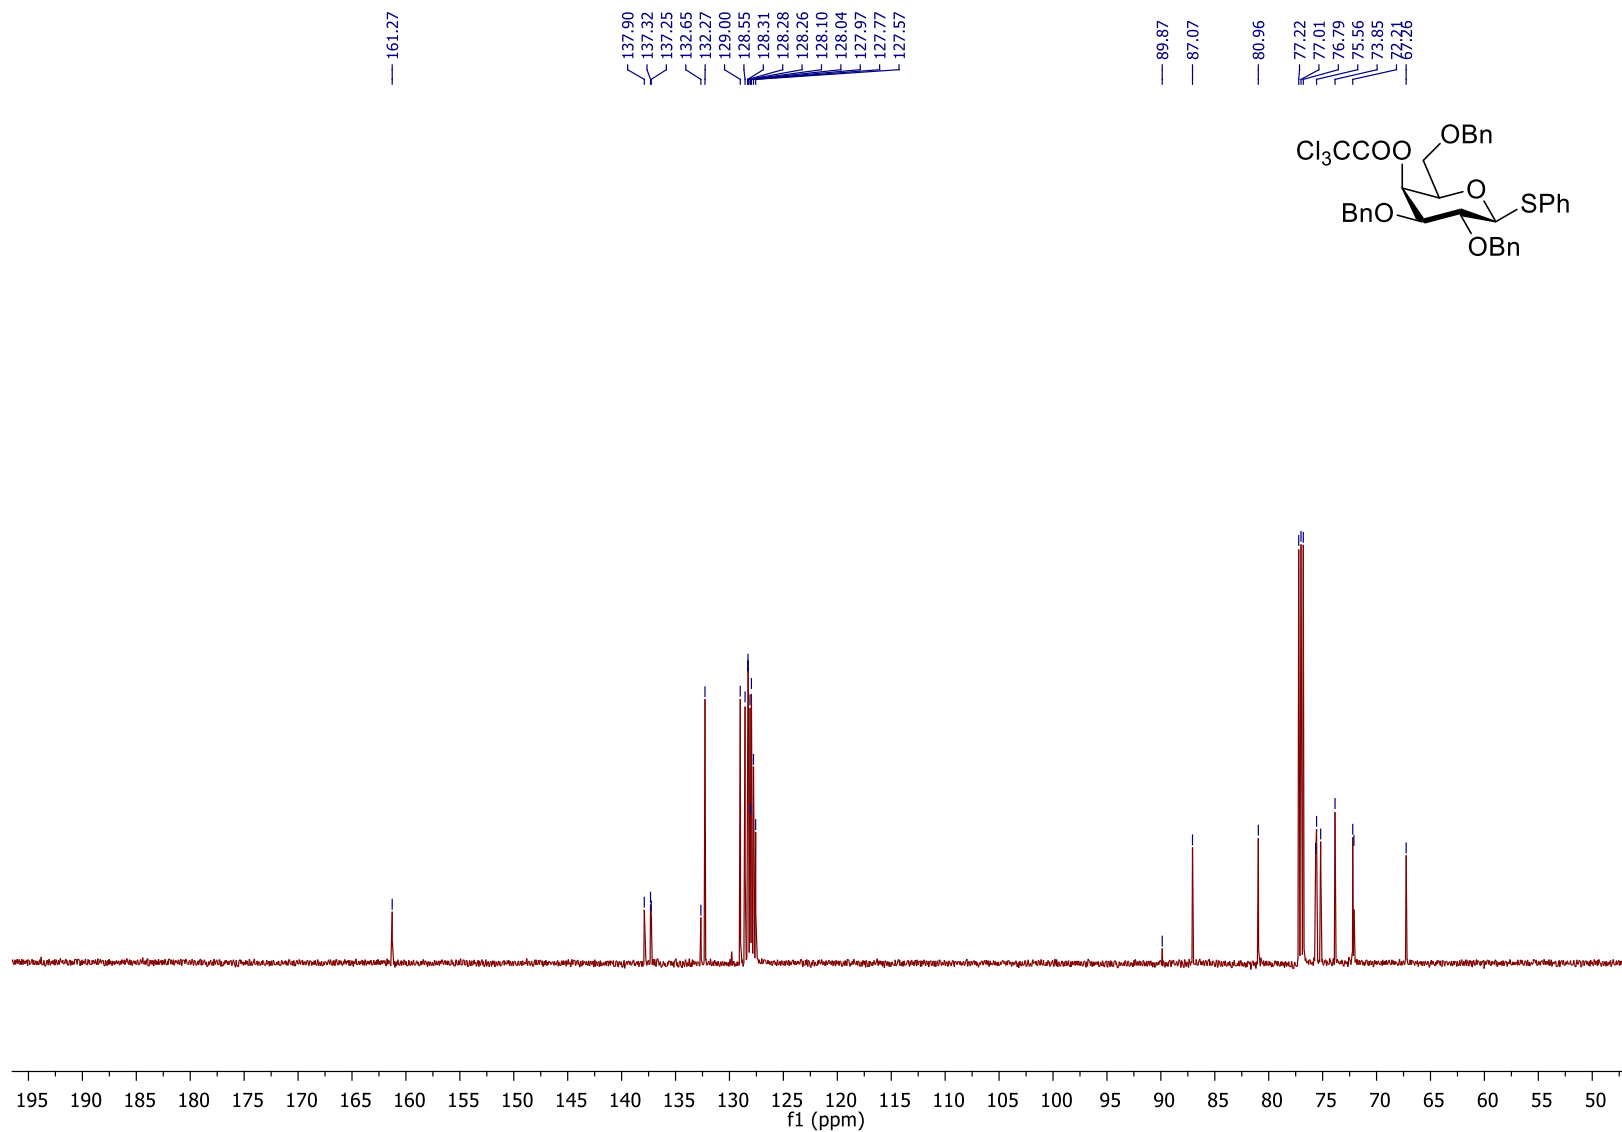

<sup>1</sup>H NMR (600 MHz, C<sub>6</sub>D<sub>6</sub>) Spectrum of Phenyl 2,3,6-tri-*O*-benzyl-4-*O*-trichloroacetyl-1-thio-β-D-galactopyranoside (**16**)

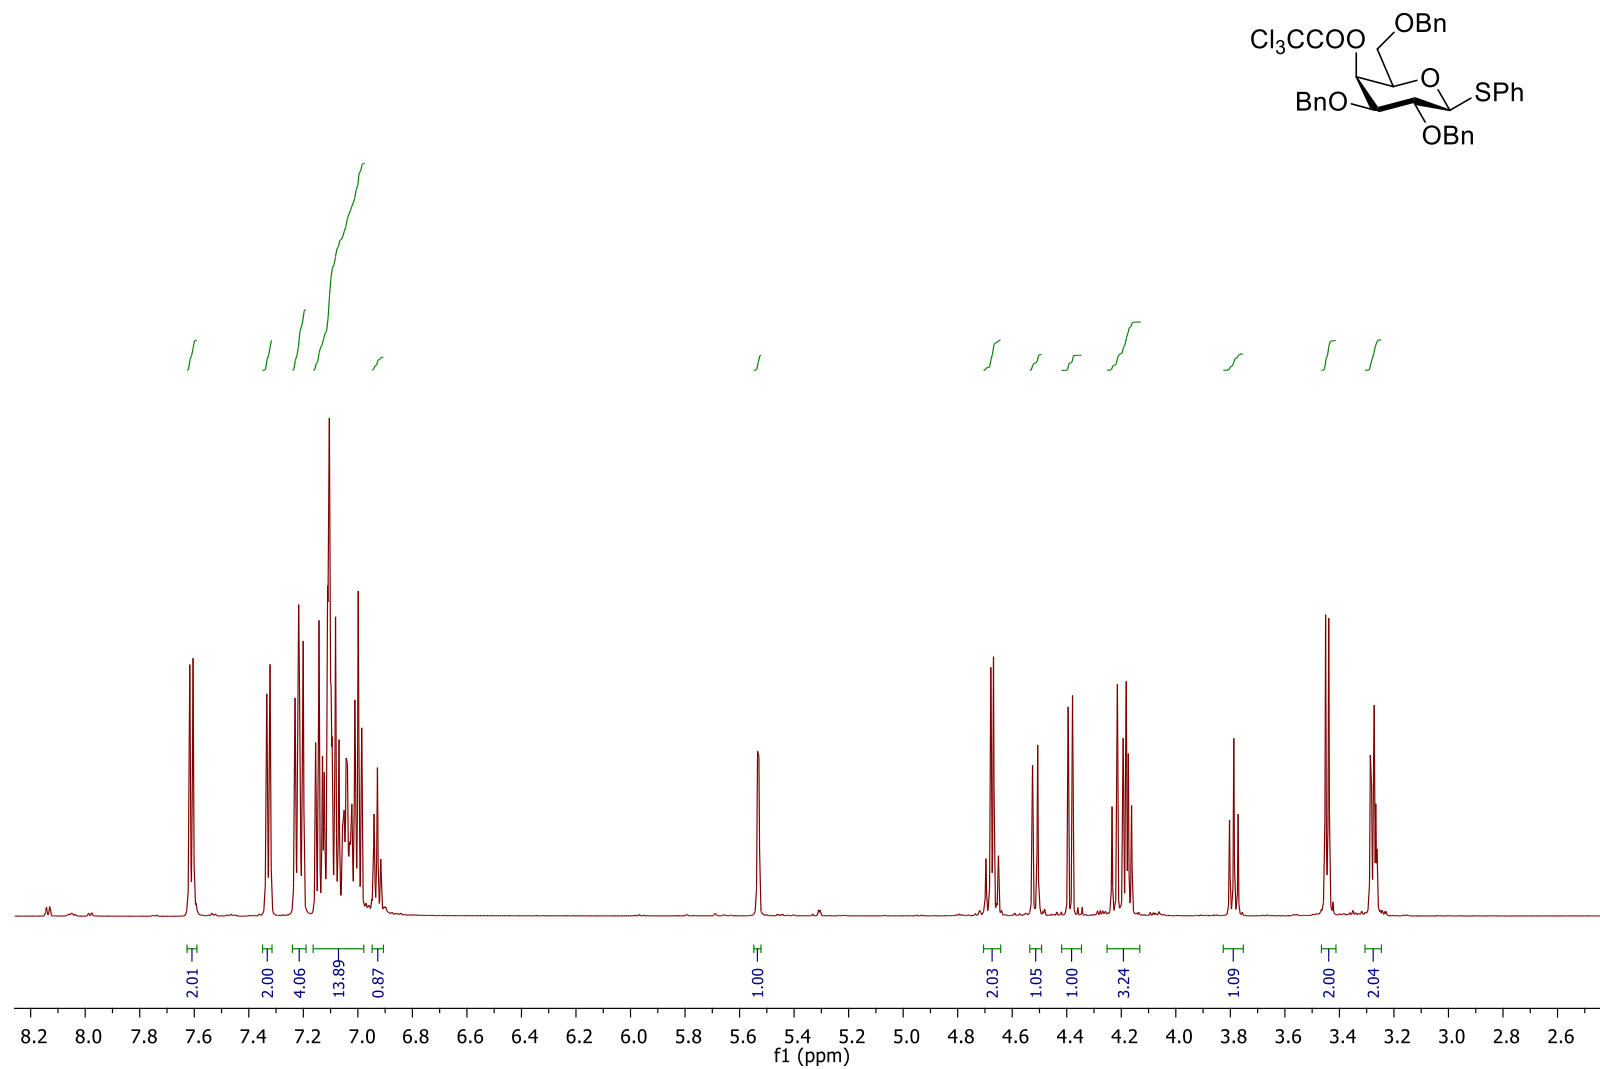

<sup>1</sup>H NMR (600 MHz, CDCl<sub>3</sub>) Spectrum of Phenyl 4-*O*-trichloroacetyl-(6*S*)-[6-<sup>2</sup>H<sub>1</sub>]-2,3,6-tri-*O*-benzyl-1-thio-β-D-galactopyranoside  
**(6S-D-16)**

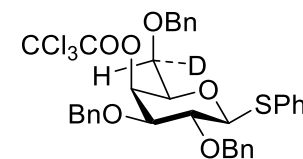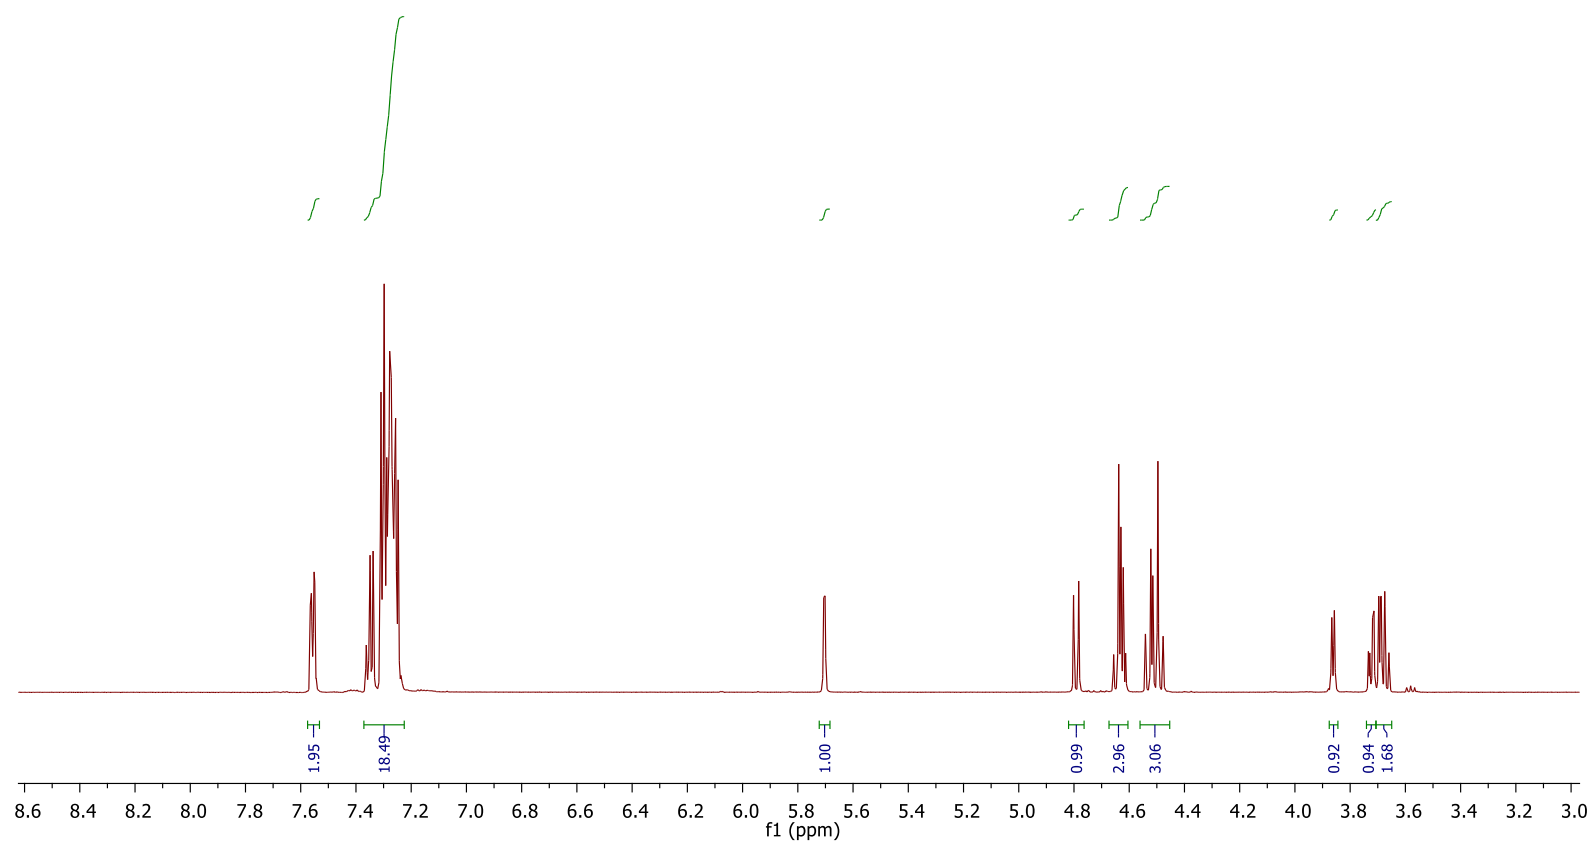

<sup>1</sup>H NMR (600 MHz, C<sub>6</sub>D<sub>6</sub>) Spectrum of Phenyl 4-*O*-trichloroacetyl-(6*S*)-[6-<sup>2</sup>H<sub>1</sub>]-2,3,6-tri-*O*-benzyl-1-thio-β-D-galactopyranoside  
**(6*S*-D-16)**

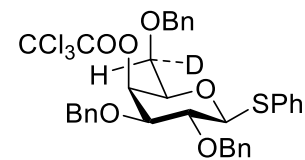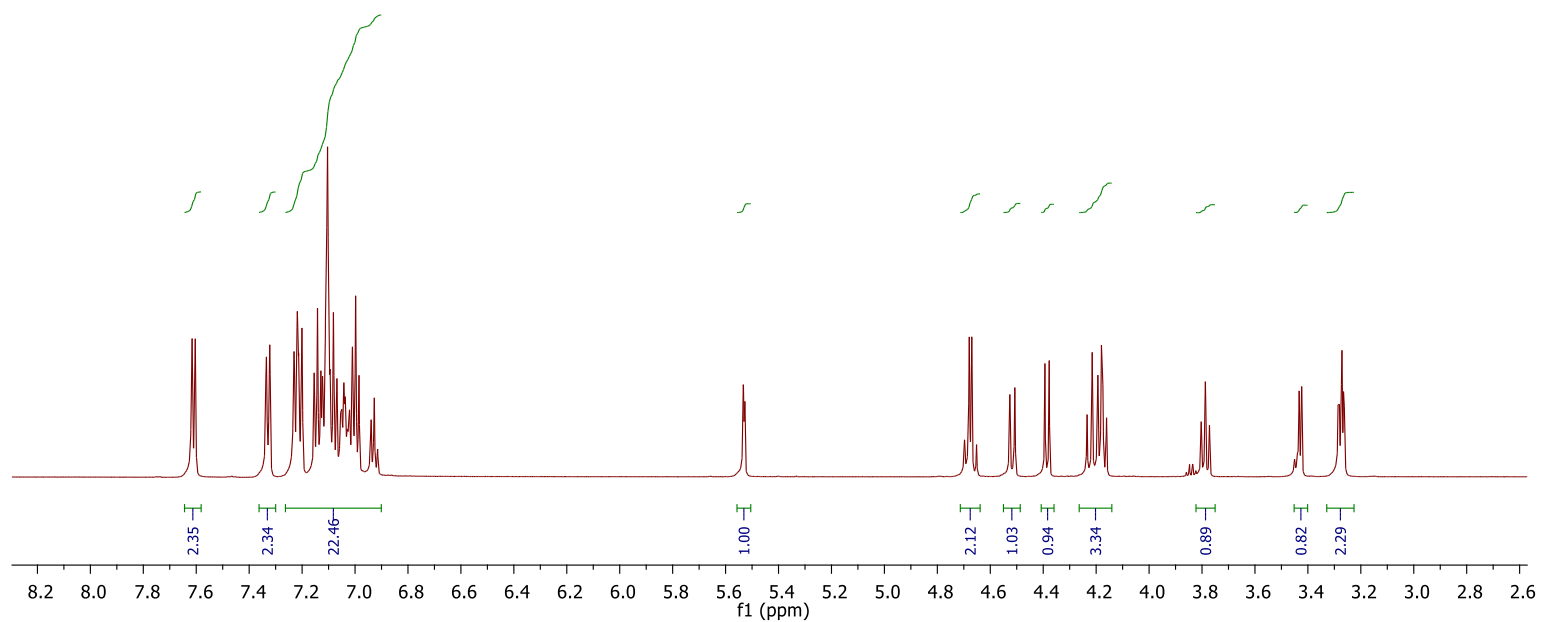

$^1\text{H}$  NMR (600 MHz,  $\text{CDCl}_3$ ) Spectrum of Phenyl 4-*O*-benzoyl-2,3,6-tri-*O*-benzyl-1-thio- $\beta$ -D-galactopyranoside (**17**)

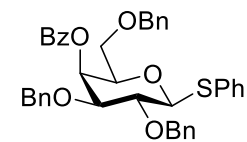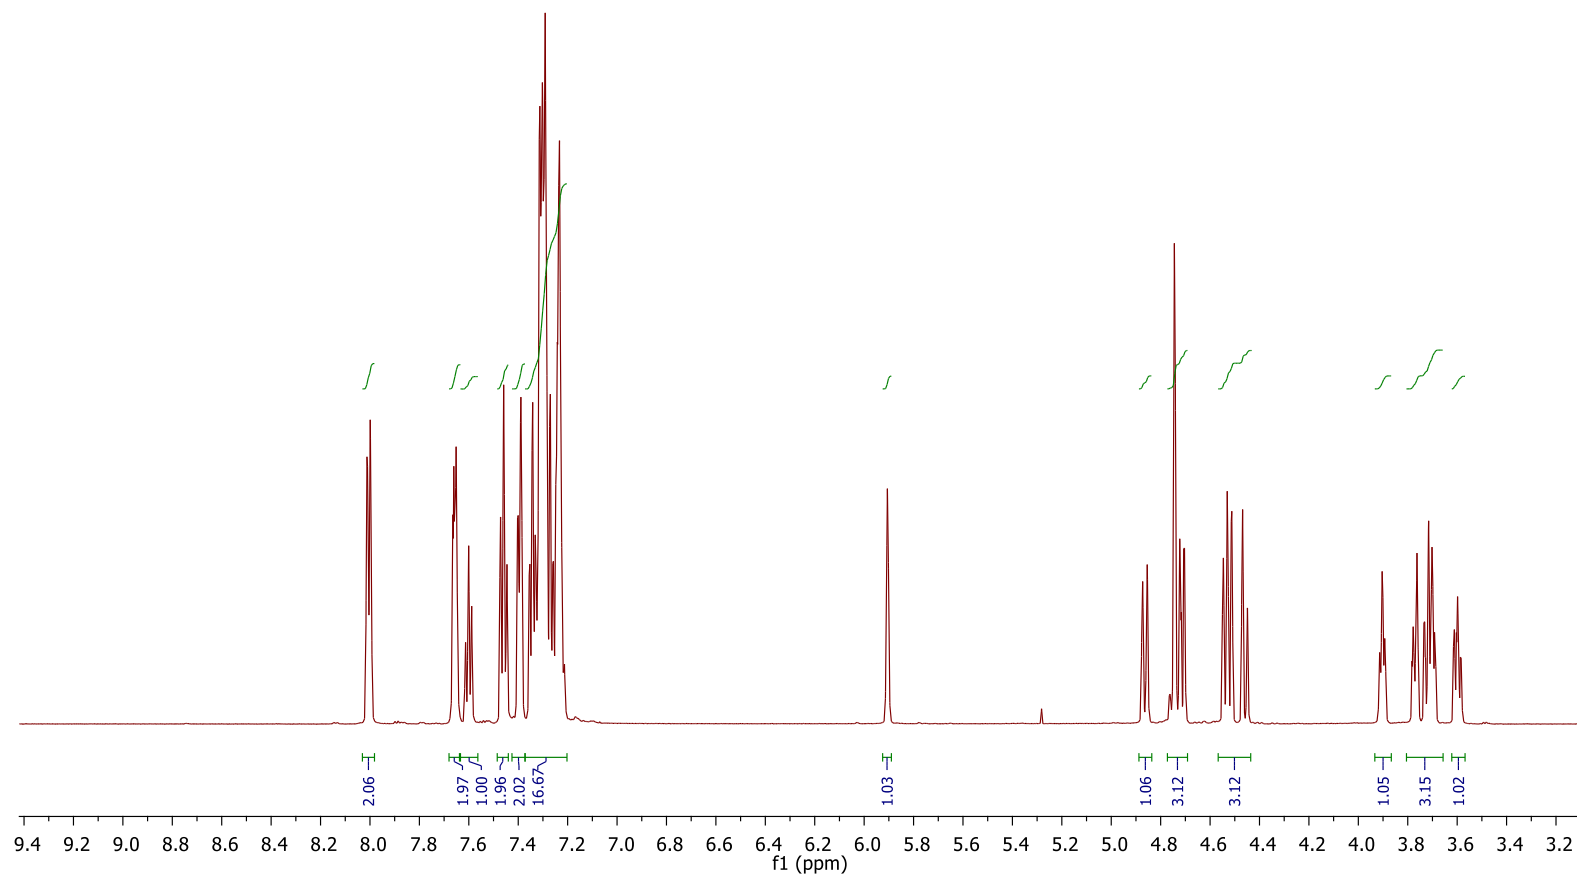

$^1\text{H}$  NMR (600 MHz,  $\text{C}_6\text{D}_6$ ) Spectrum of Phenyl 4-*O*-benzoyl-2,3,6-tri-*O*-benzyl-1-thio- $\beta$ -D-galactopyranoside (**17**)

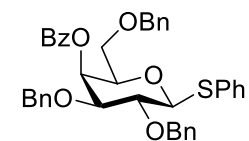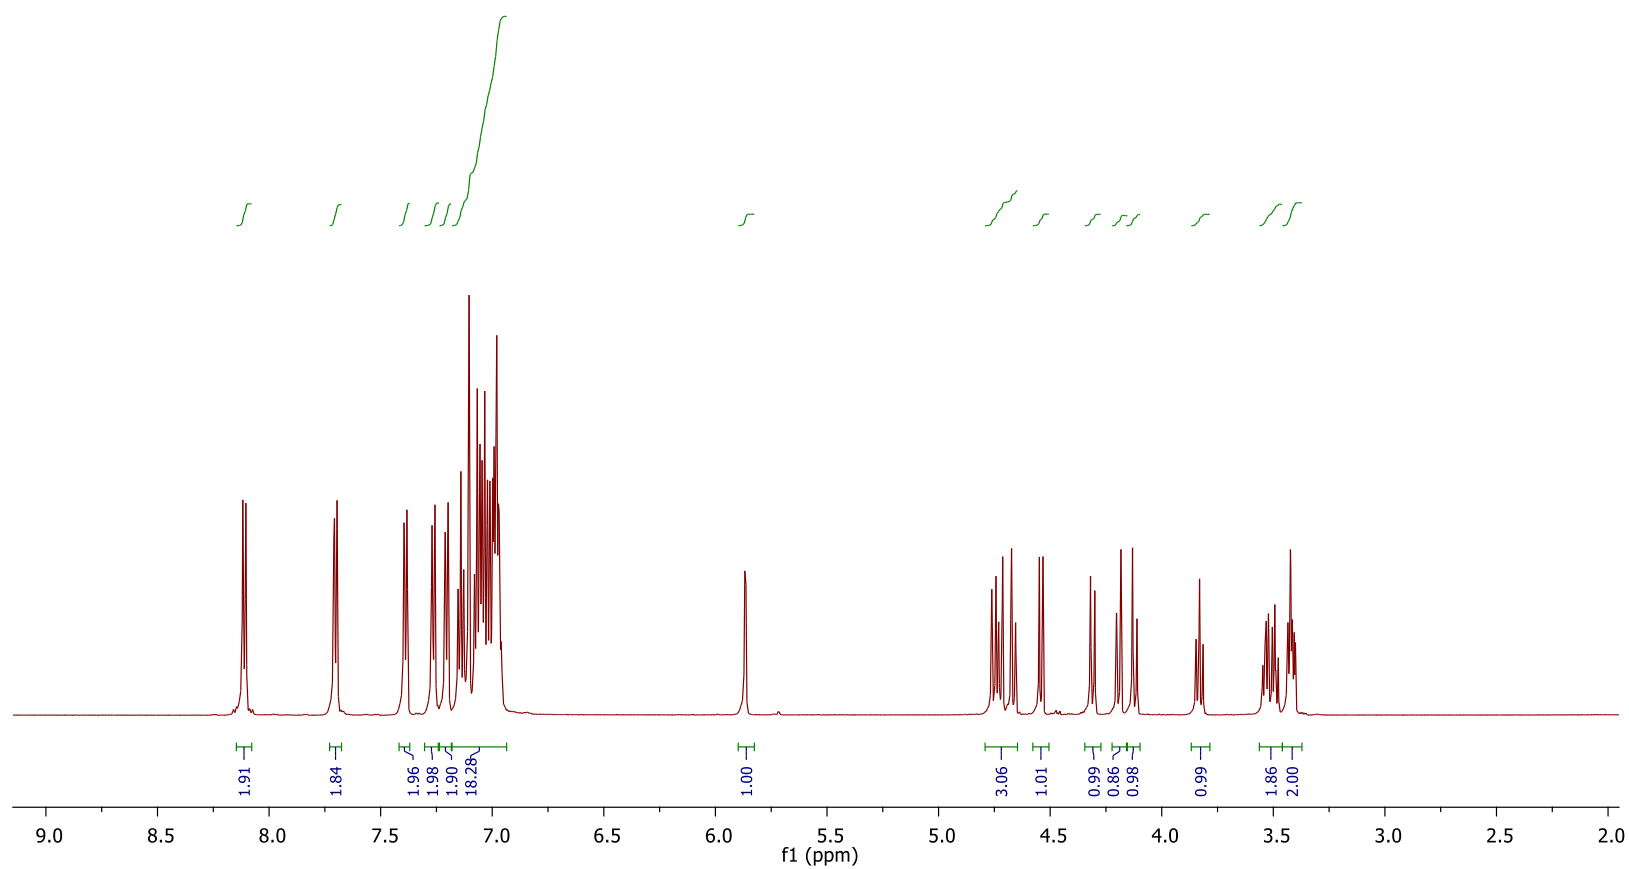



$^1\text{H}$  NMR (600 MHz,  $\text{CDCl}_3$ ) Spectrum of Phenyl 4-*O*-benzoyl-(6*S*)-[6- $^2\text{H}_1$ ]-2,3,6-tri-*O*-benzyl-1-thio- $\beta$ -D-galactopyranoside (**6S-D-17**)

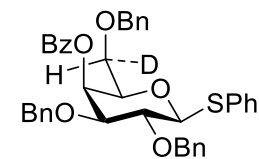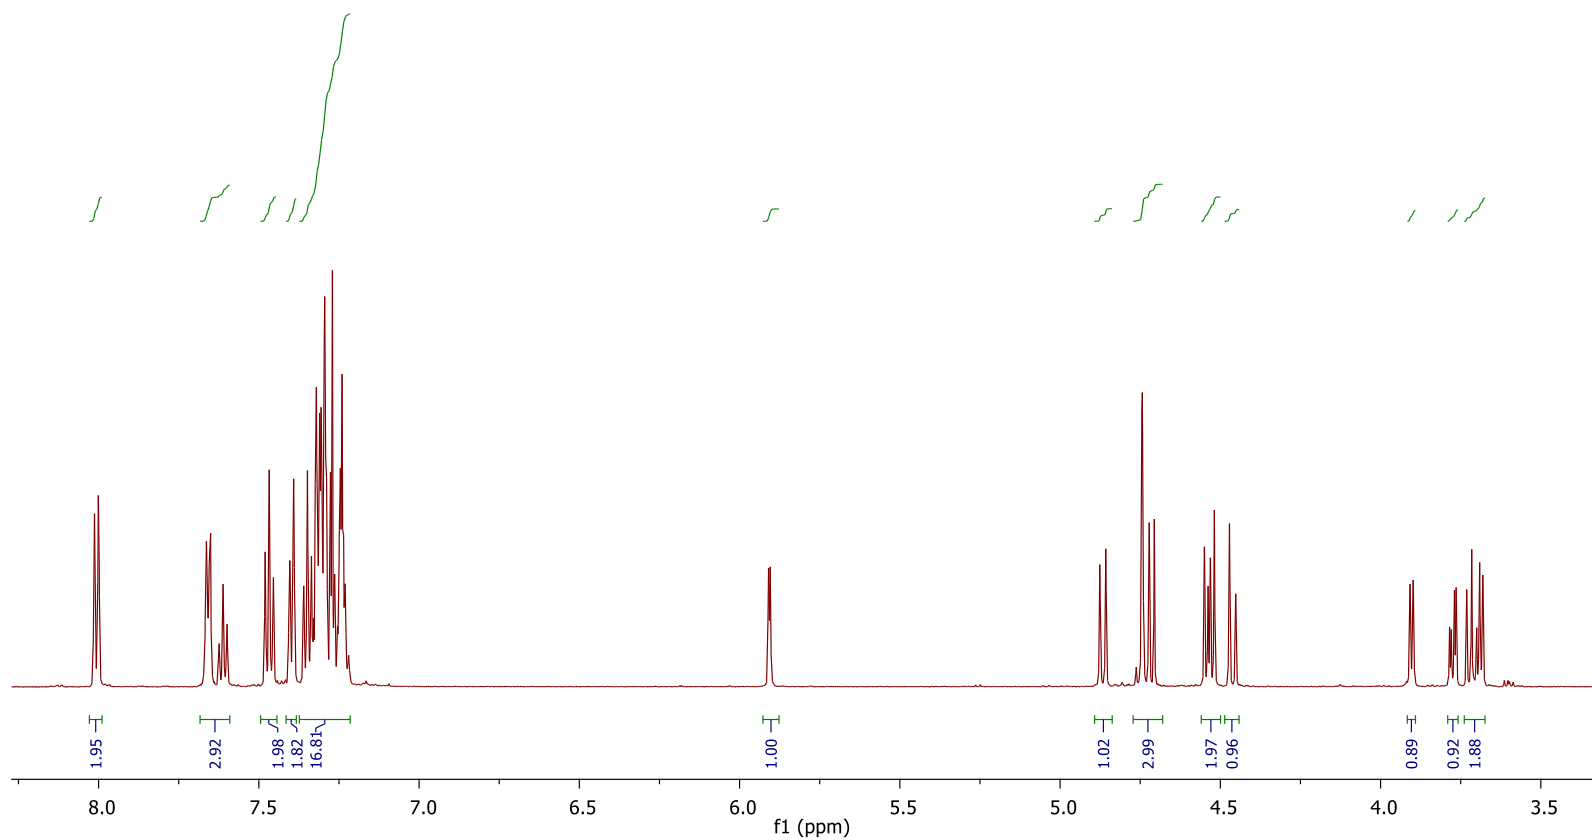

$^1\text{H}$  NMR (600 MHz,  $\text{C}_6\text{D}_6$ ) Spectrum of Phenyl 4-*O*-benzoyl-(6*S*)-[6- $^2\text{H}_1$ ]-2,3,6-tri-*O*-benzyl-1-thio- $\beta$ -D-galactopyranoside (**6S-D-17**)

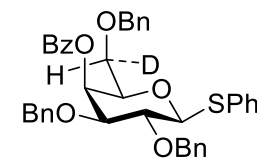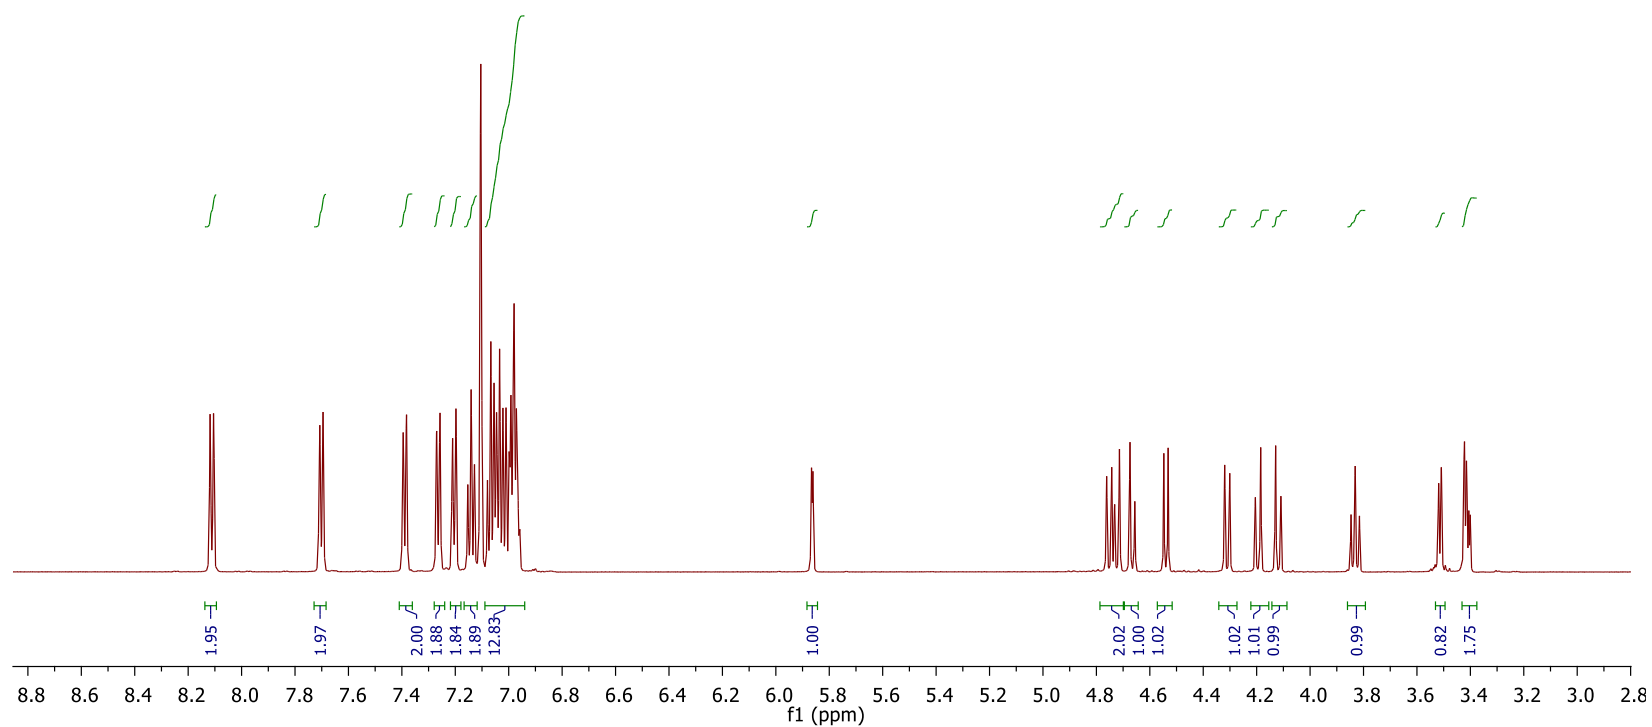

$^1\text{H}$  NMR (600 MHz,  $\text{CDCl}_3$ ) Spectrum of Phenyl 4-*O*-(*p*-methylbenzoyl)-2,3,6-tri-*O*-benzyl-1-thio- $\beta$ -D-galactopyranoside (**18**)

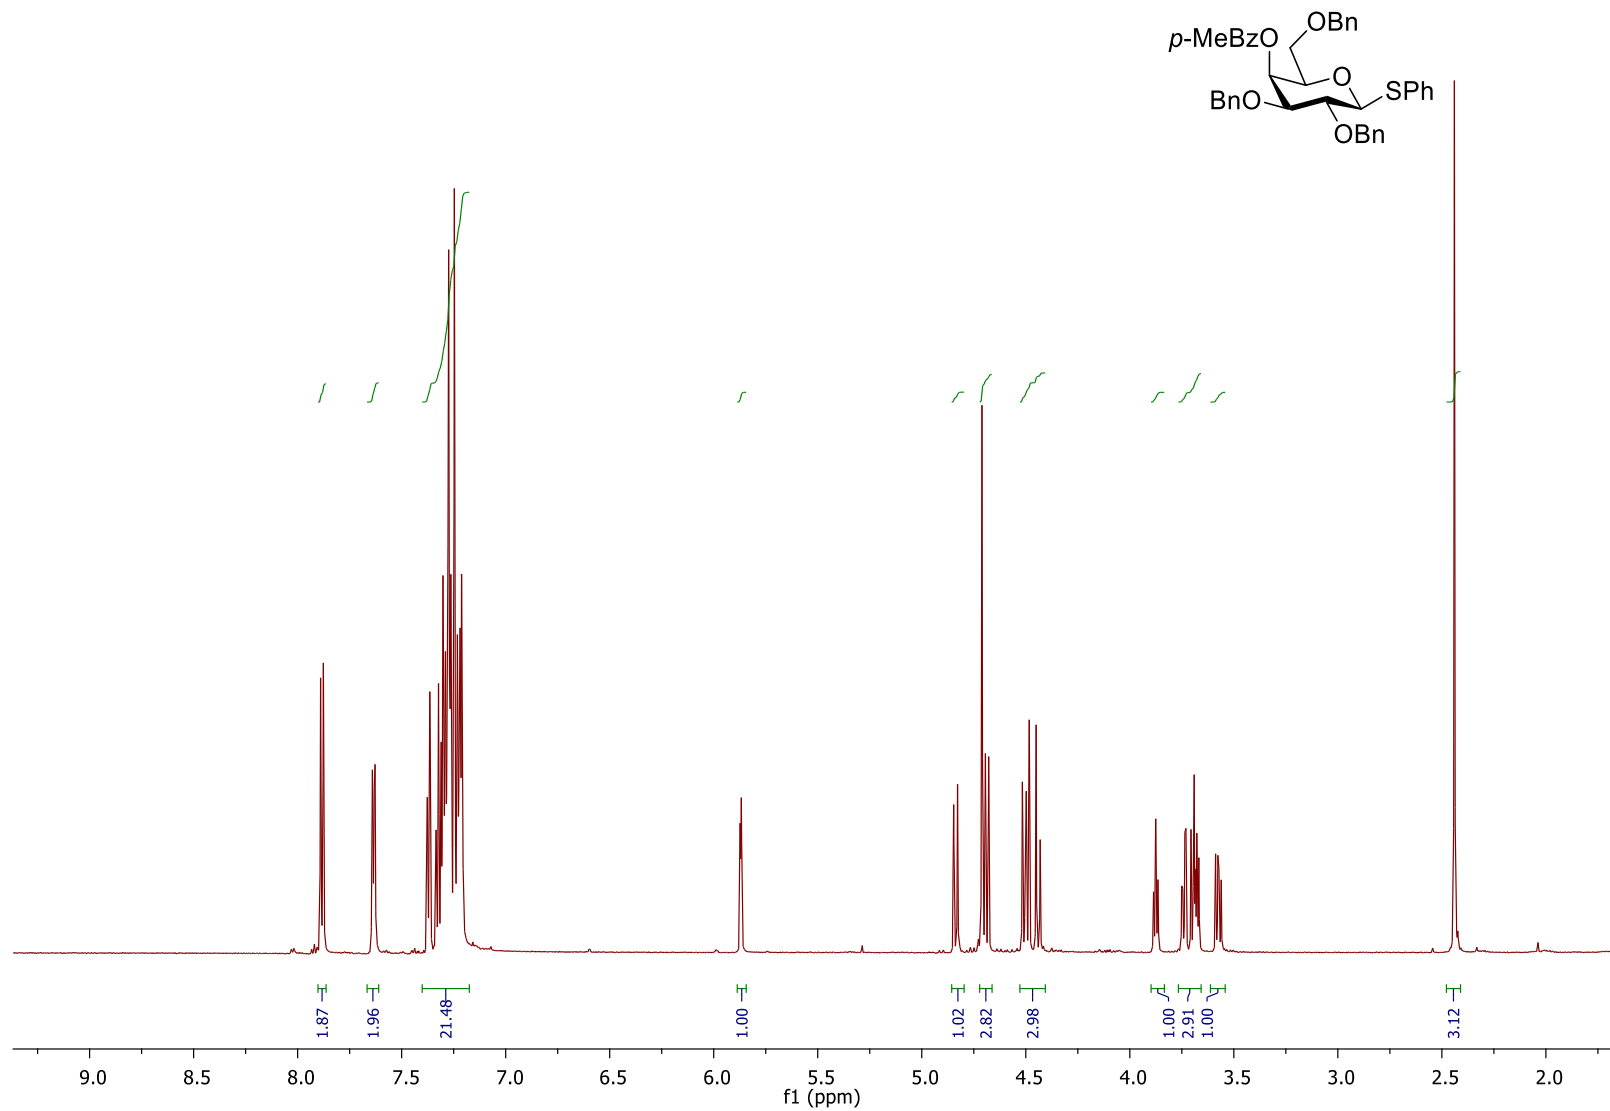

$^{13}\text{C}$  NMR (150 MHz,  $\text{CDCl}_3$ ) Spectrum of Phenyl 4-*O*-(*p*-methylbenzoyl)-2,3,6-tri-*O*-benzyl-1-thio- $\beta$ -D-galactopyranoside (**18**)

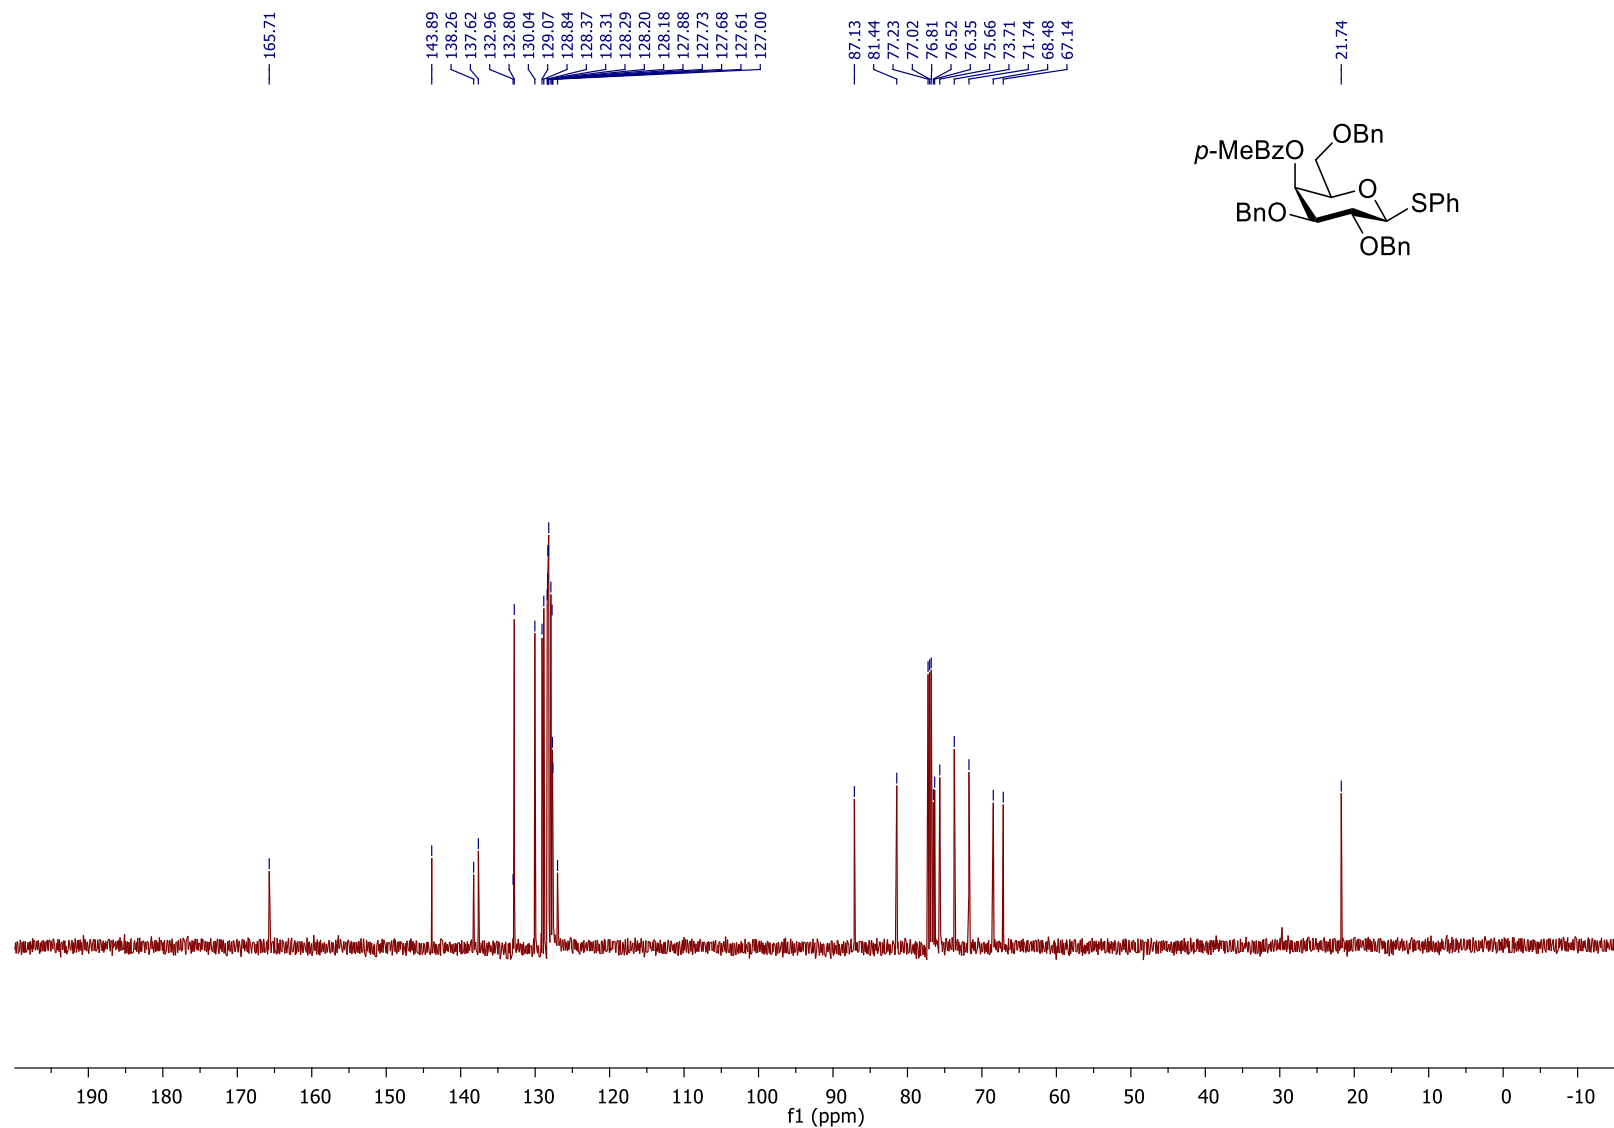

$^1\text{H}$  NMR (600 MHz,  $\text{C}_6\text{D}_6$ ) Spectrum of Phenyl 4-*O*-(*p*-methylbenzoyl)-2,3,6-tri-*O*-benzyl-1-thio- $\beta$ -D-galactopyranoside (**18**)

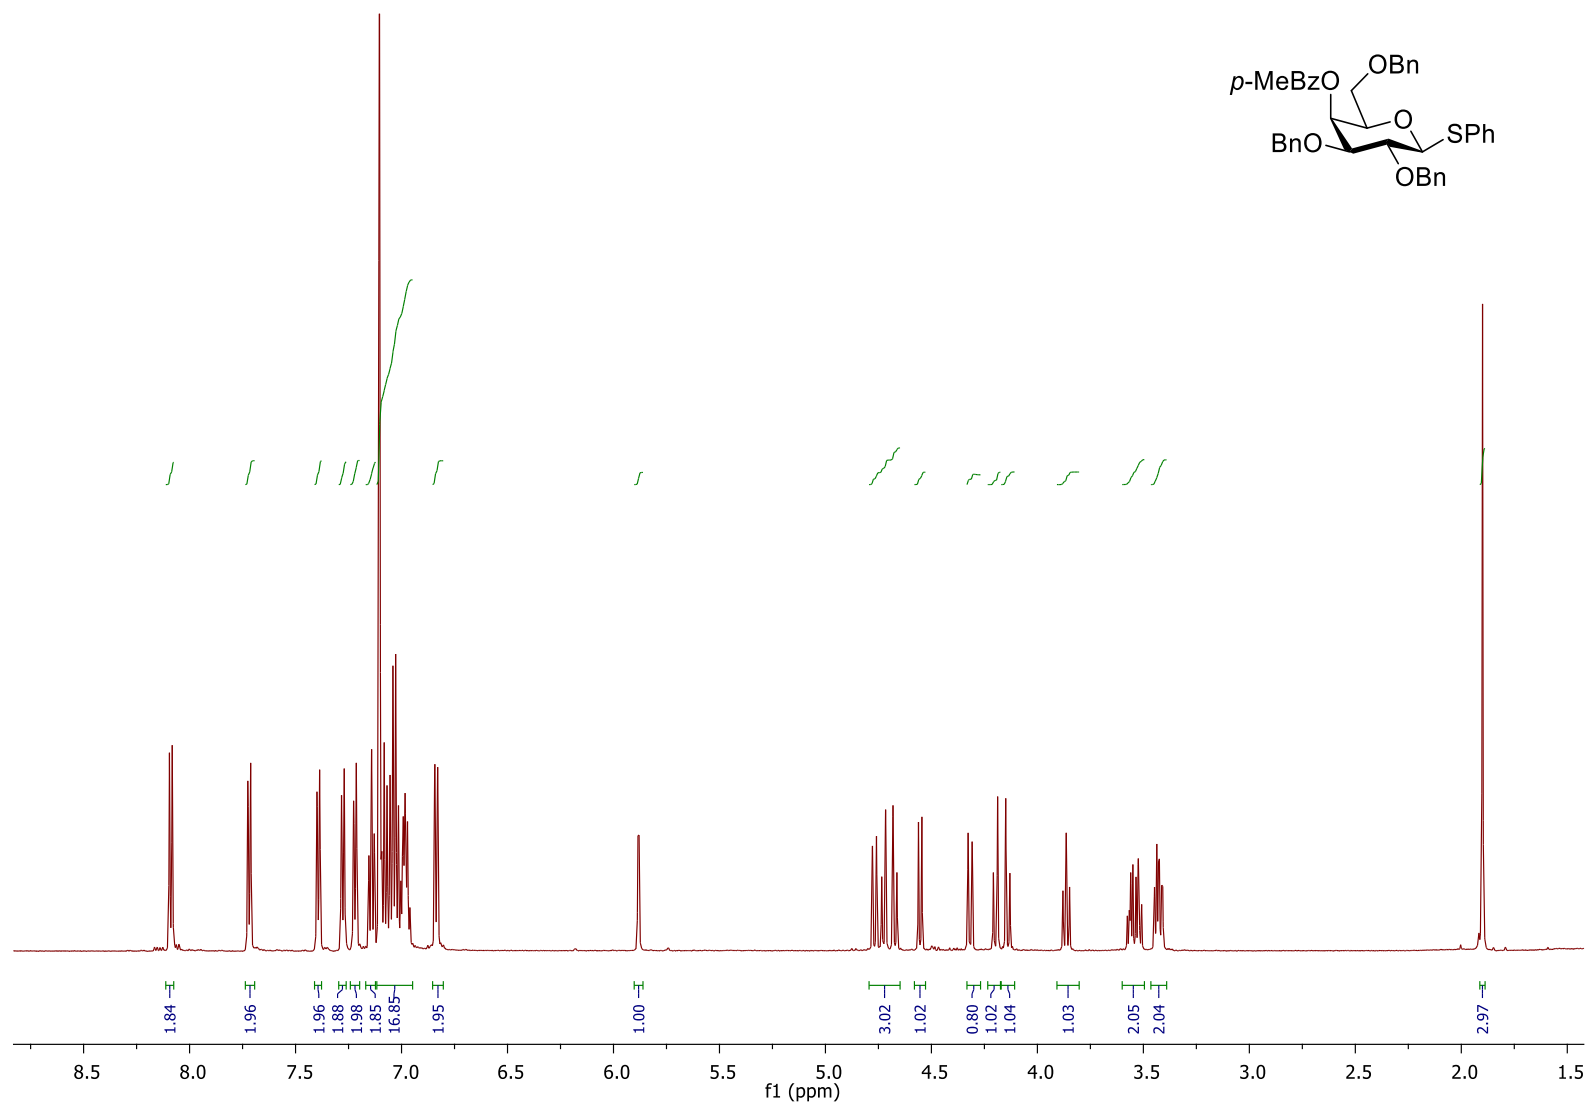

<sup>1</sup>H NMR (600 MHz, CDCl<sub>3</sub>) Spectrum of Phenyl 4-*O*-(*p*-methylbenzoyl-(6*S*)-[6-<sup>2</sup>H<sub>1</sub>]-2,3,6-tri-*O*-benzyl-1-thio-β-D-galactopyranoside (6*S*-**D-18**)

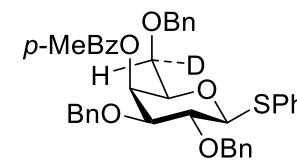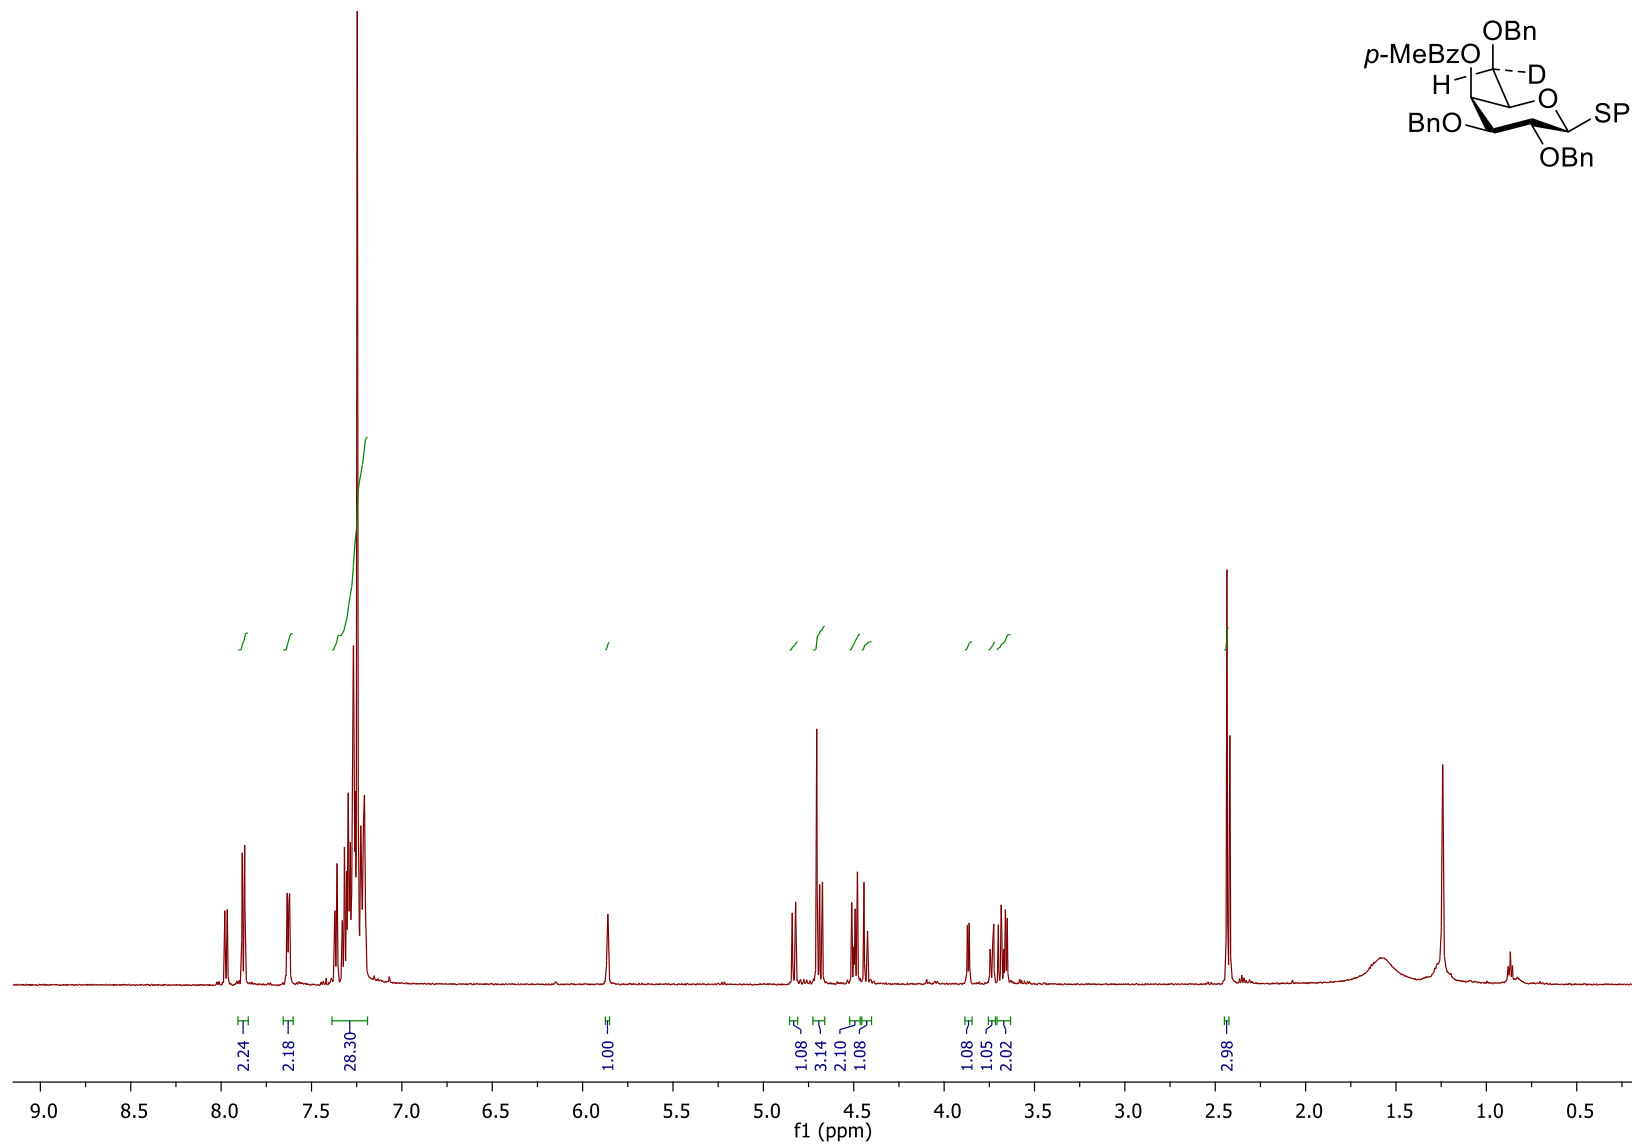

<sup>1</sup>H NMR (600 MHz, C<sub>6</sub>D<sub>6</sub>) Spectrum of Phenyl 4-*O*-(*p*-methylbenzoyl-(6*S*)-[6-<sup>2</sup>H<sub>1</sub>]-2,3,6-tri-*O*-benzyl-1-thio-β-D-galactopyranoside (6*S*-D-18)

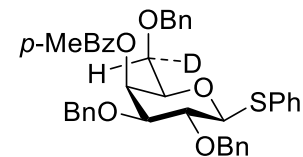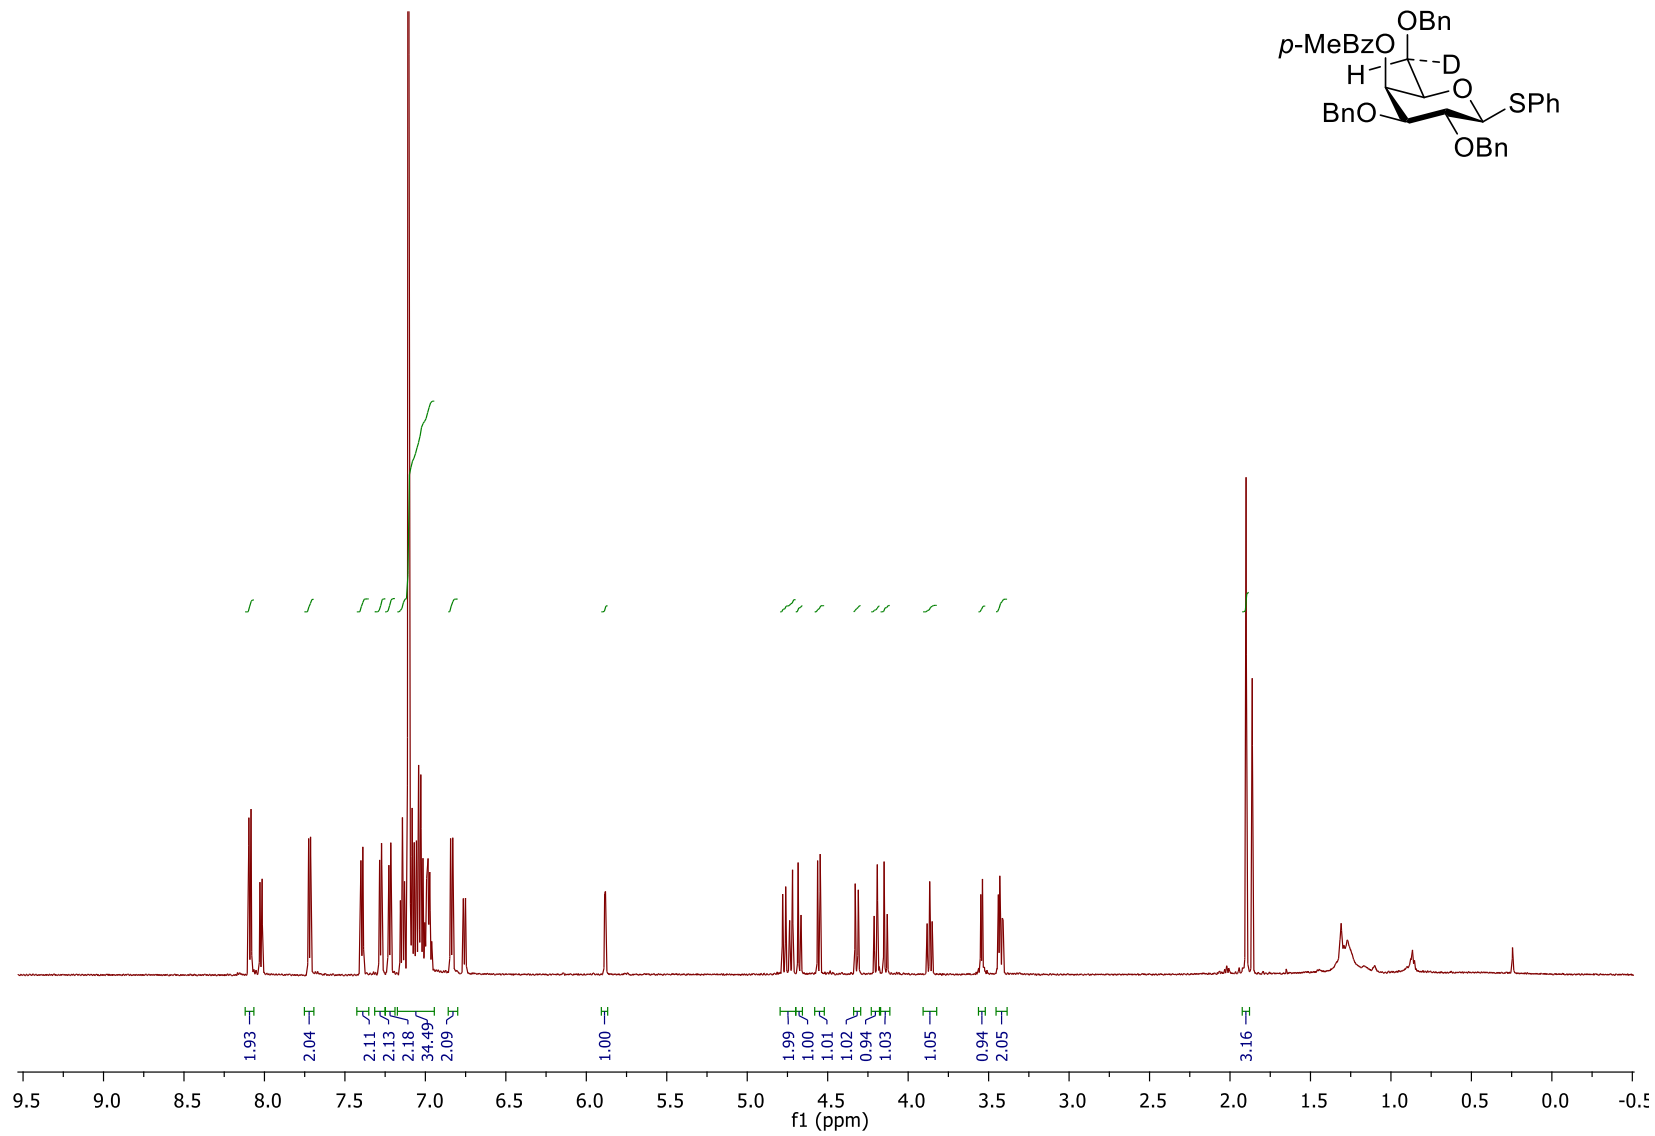

<sup>1</sup>H NMR (600 MHz, CDCl<sub>3</sub>) Spectrum of Phenyl 4-*O*-(*p*-methoxybenzoyl)-2,3,6-tri-*O*-benzyl-1-thio-β-D-galactopyranoside (**19**)

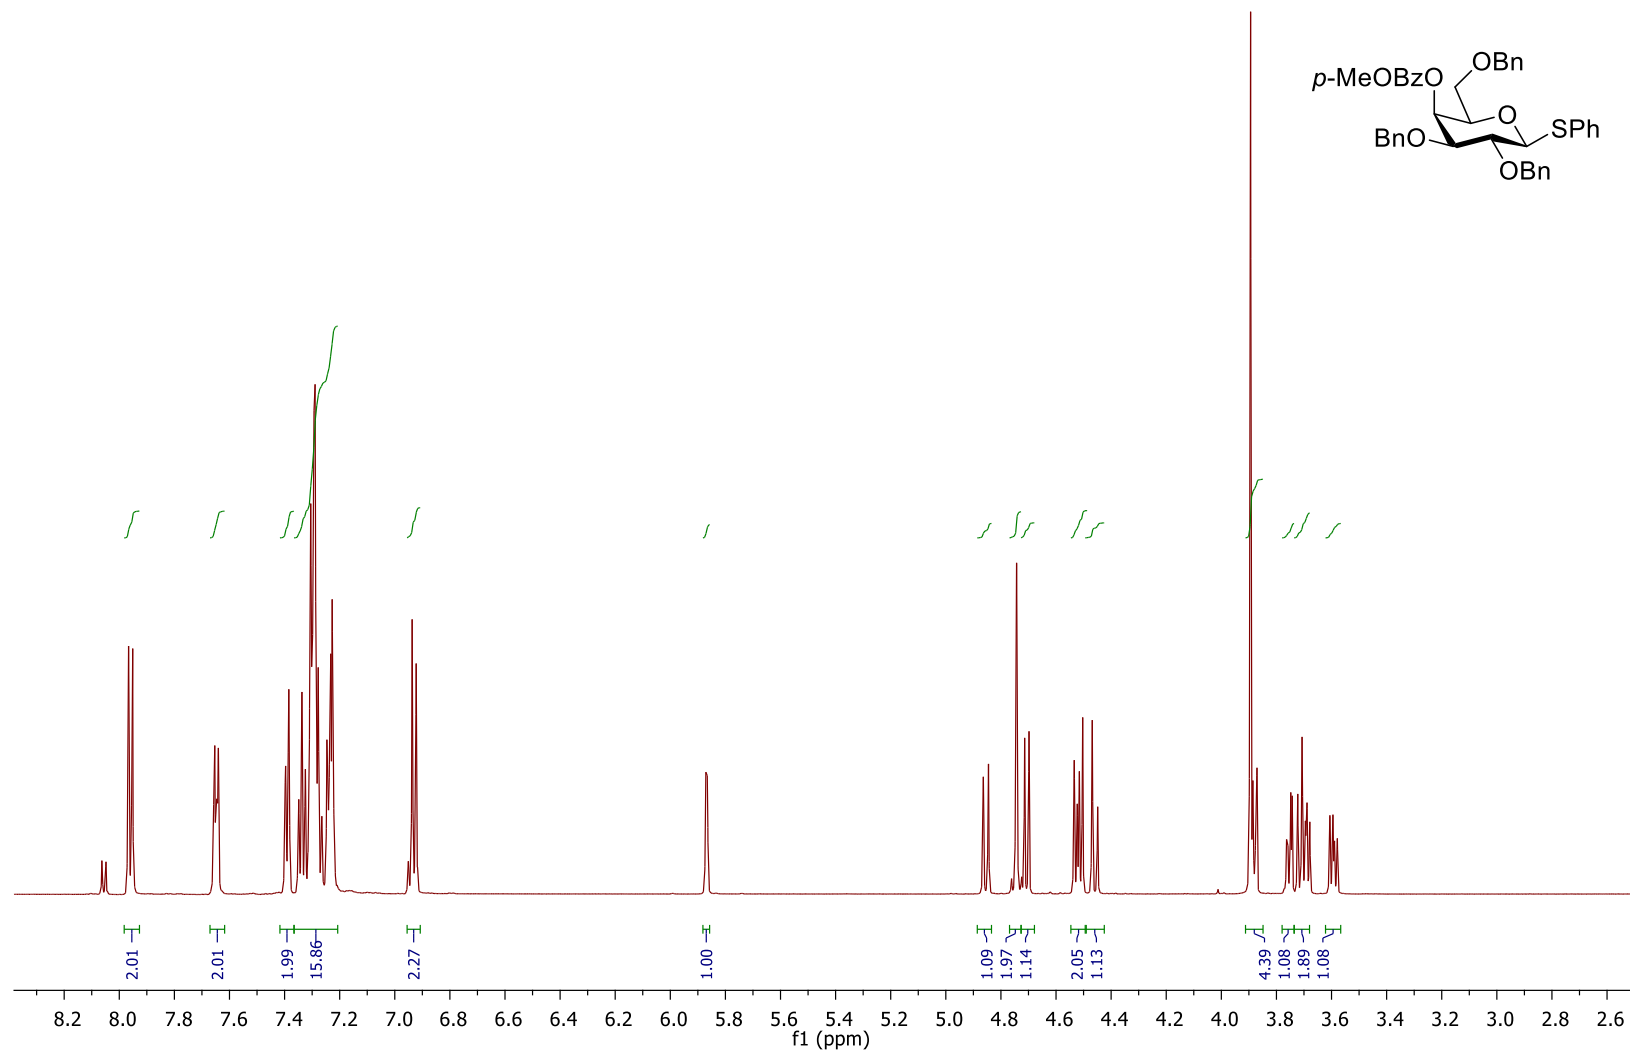



<sup>1</sup>H NMR (600 MHz, C<sub>6</sub>D<sub>6</sub>) Spectrum of Phenyl 4-*O*-(*p*-methoxybenzoyl)-2,3,6-tri-*O*-benzyl-1-thio-β-D-galactopyranoside (**19**)

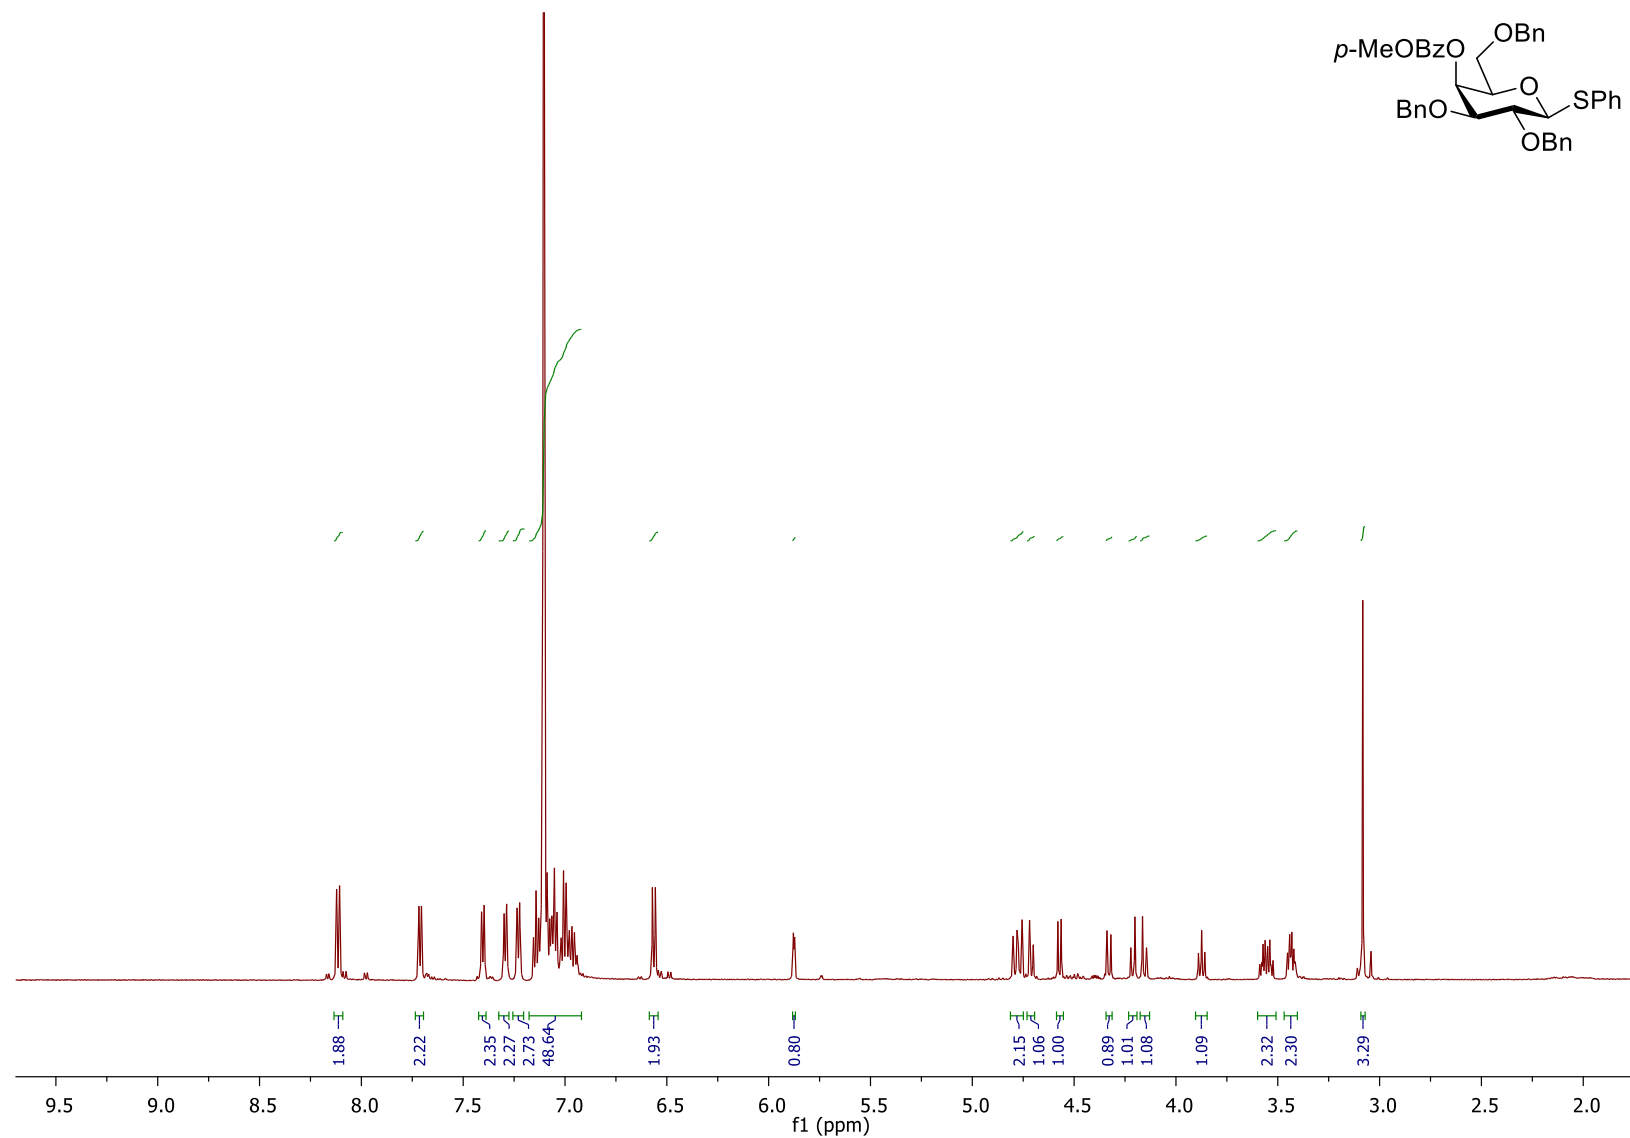

<sup>1</sup>H NMR (600 MHz, CDCl<sub>3</sub>) Spectrum of Phenyl 4-*O*-(*p*-methoxybenzoyl-(6*S*)-[6-<sup>2</sup>H<sub>1</sub>]-2,3,6-tri-*O*-benzyl-1-thio-β-D-galactopyranoside (**6S-D-19**)

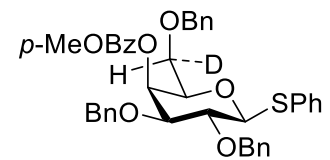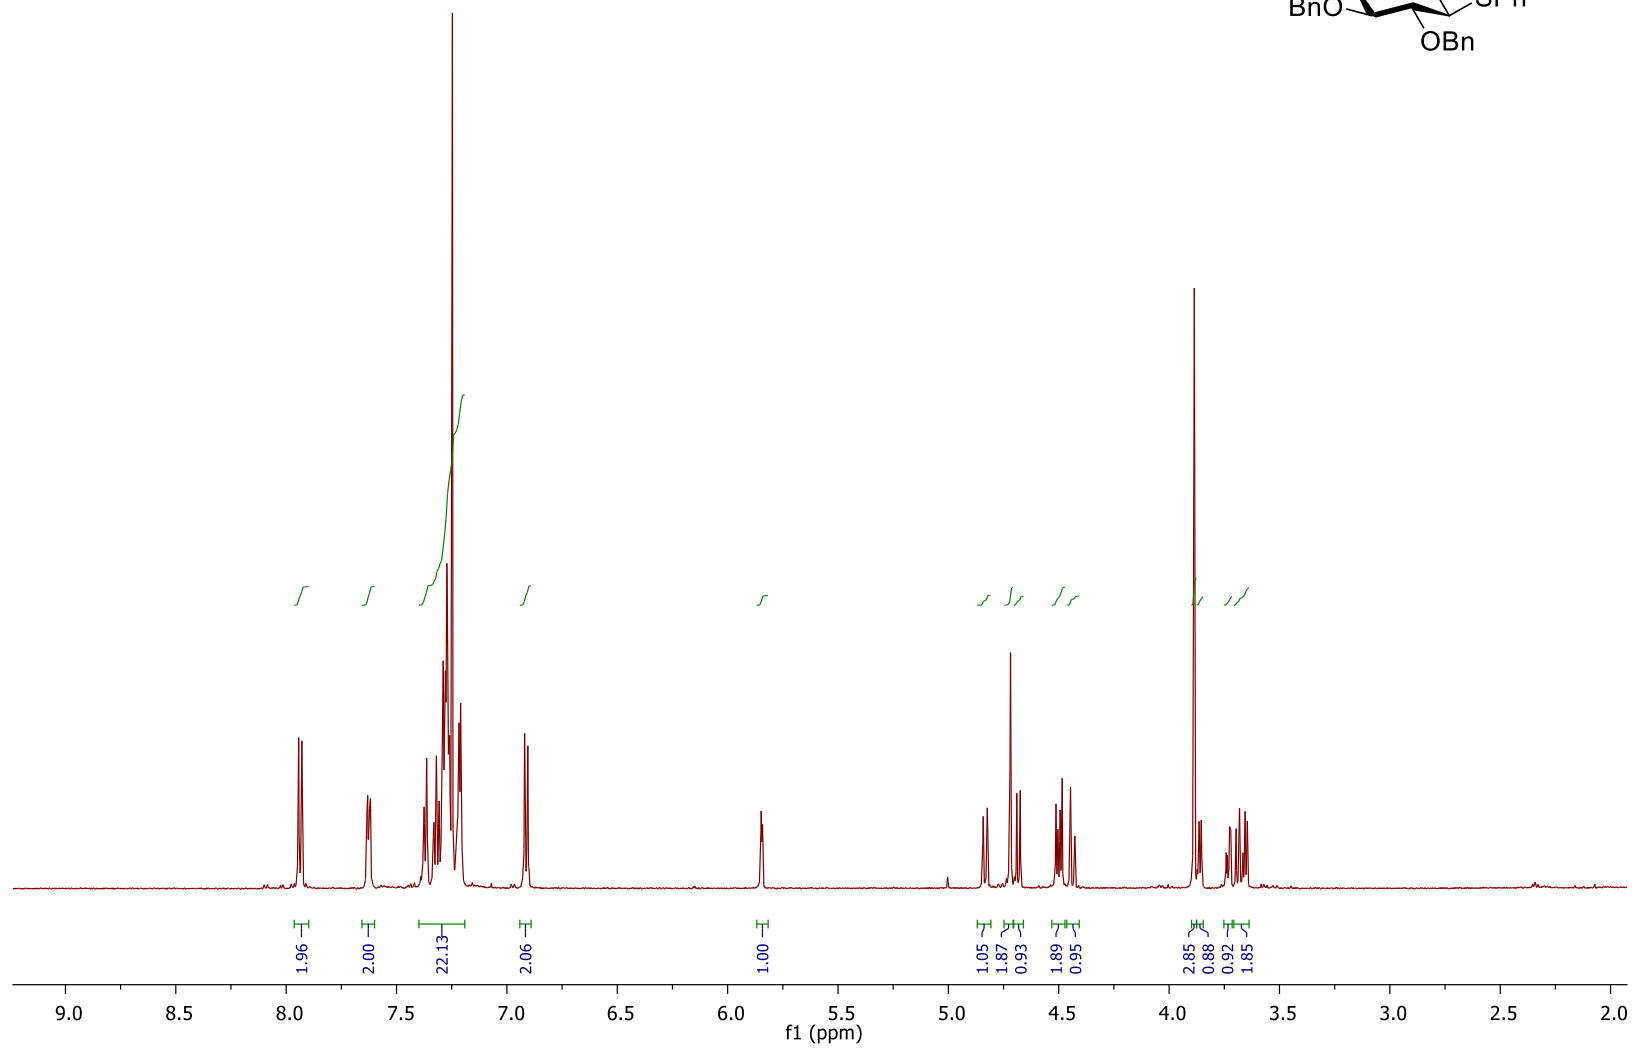

$^1\text{H}$  NMR (600 MHz,  $\text{C}_6\text{D}_6$ ) Spectrum of Phenyl 4-*O*-(*p*-methoxybenzoyl-(6*S*)-[6- $^2\text{H}_1$ ]-2,3,6-tri-*O*-benzyl-1-thio- $\beta$ -D-galactopyranoside (**6S-D-19**)

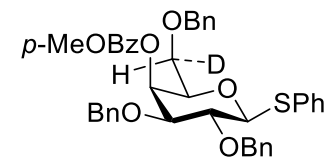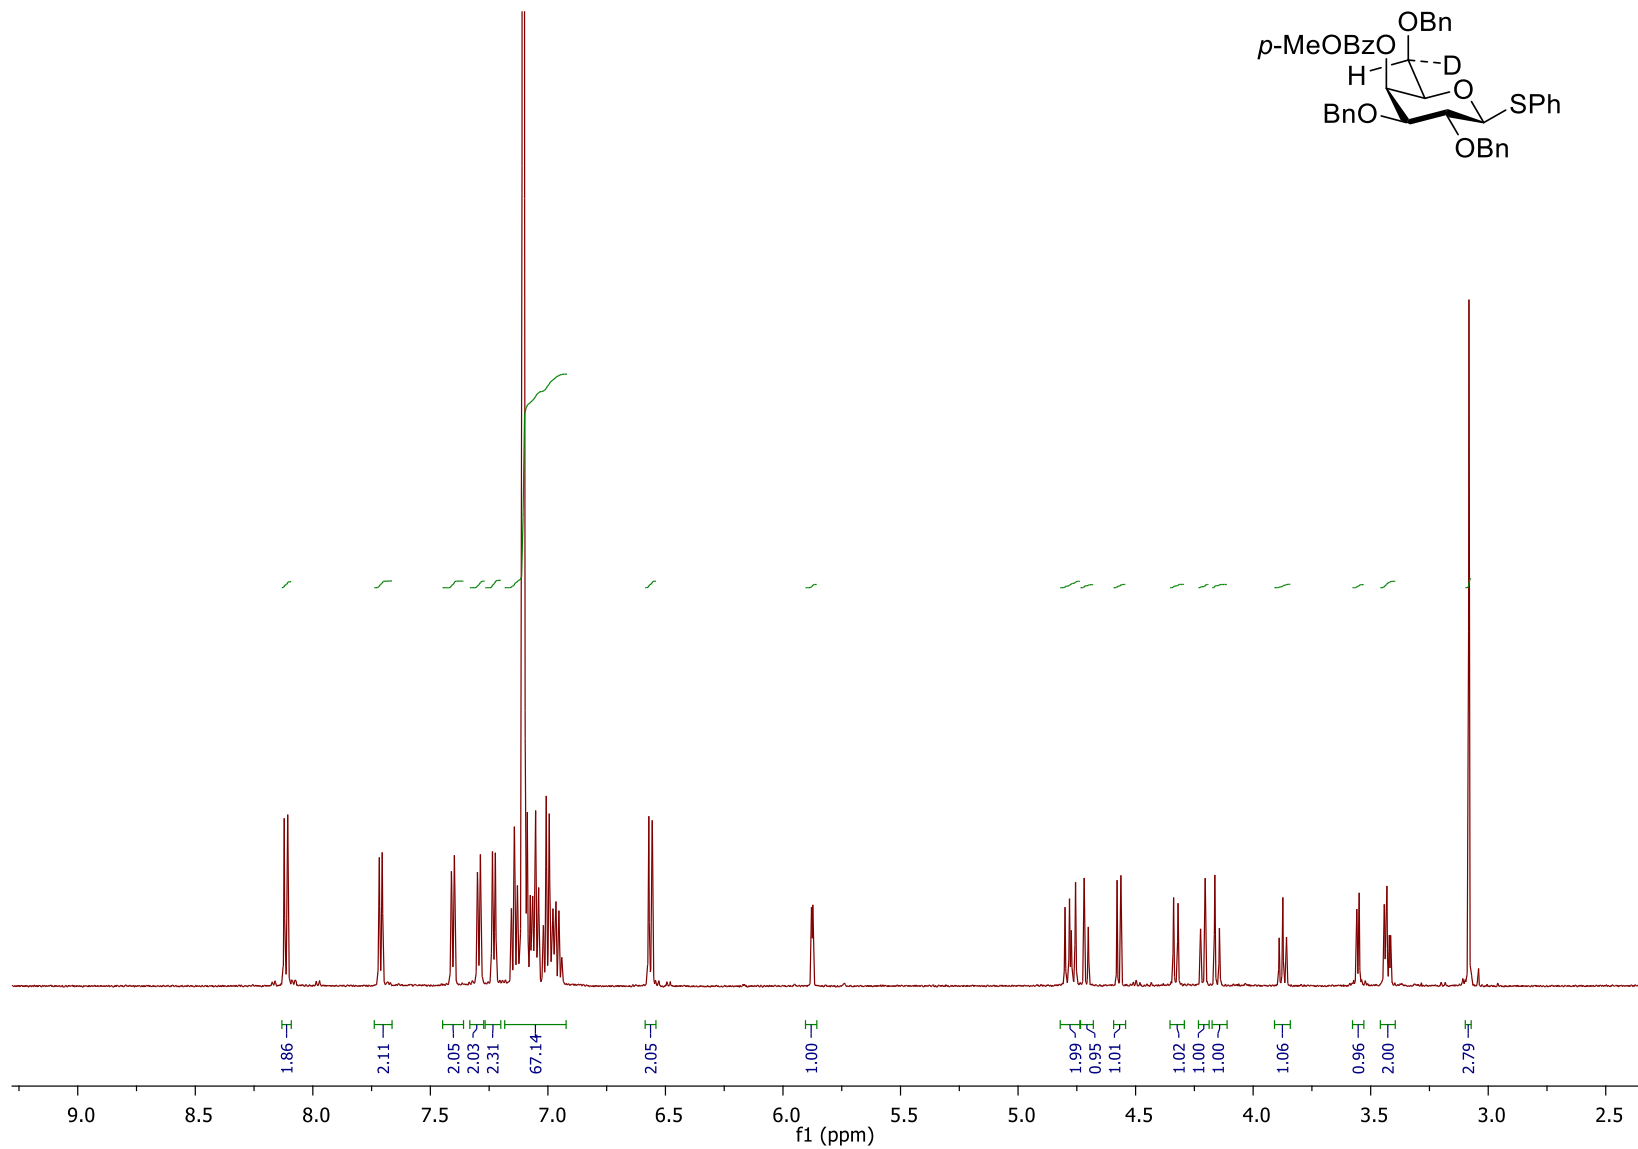

<sup>1</sup>H NMR (600 MHz, CDCl<sub>3</sub>) Spectrum of Phenyl 4-*O*-(*p*-nitrobenzoyl)-2,3,6-tri-*O*-benzyl-1-thio-β-D-galactopyranoside (**20**)

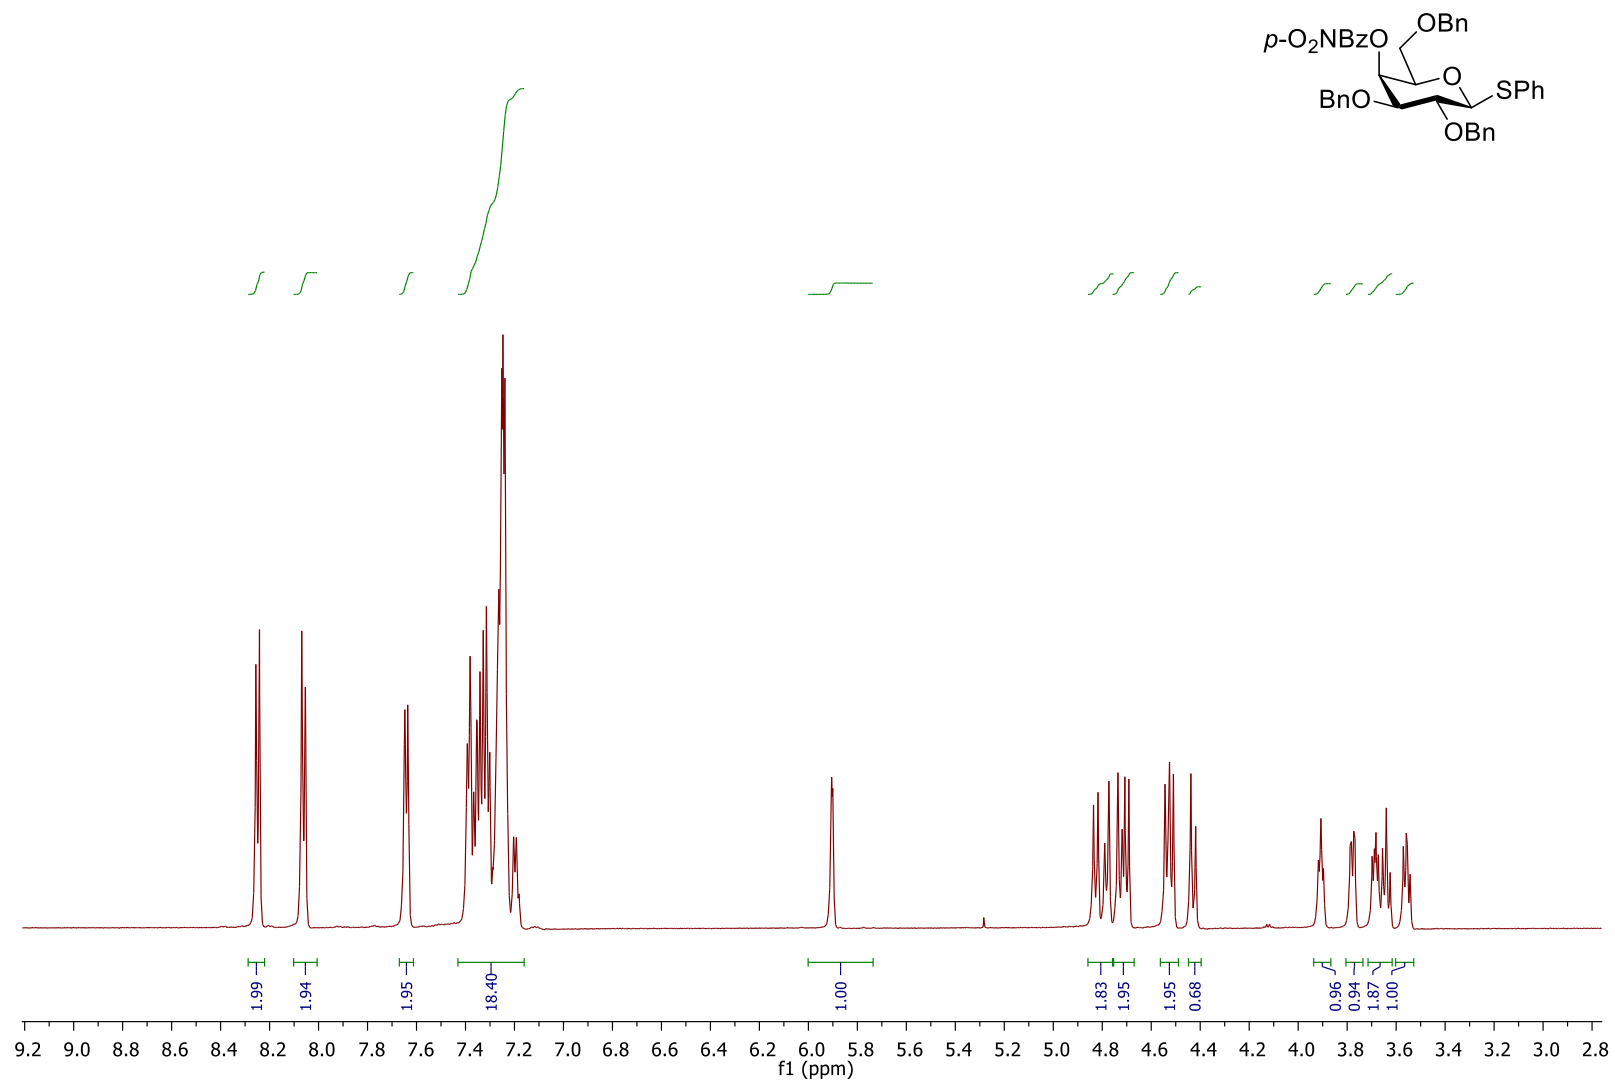

$^{13}\text{C}$  NMR (150 MHz,  $\text{CDCl}_3$ ) Spectrum of Phenyl 4-*O*-(*p*-nitrobenzoyl)-2,3,6-tri-*O*-benzyl-1-thio- $\beta$ -D-galactopyranoside (**20**)

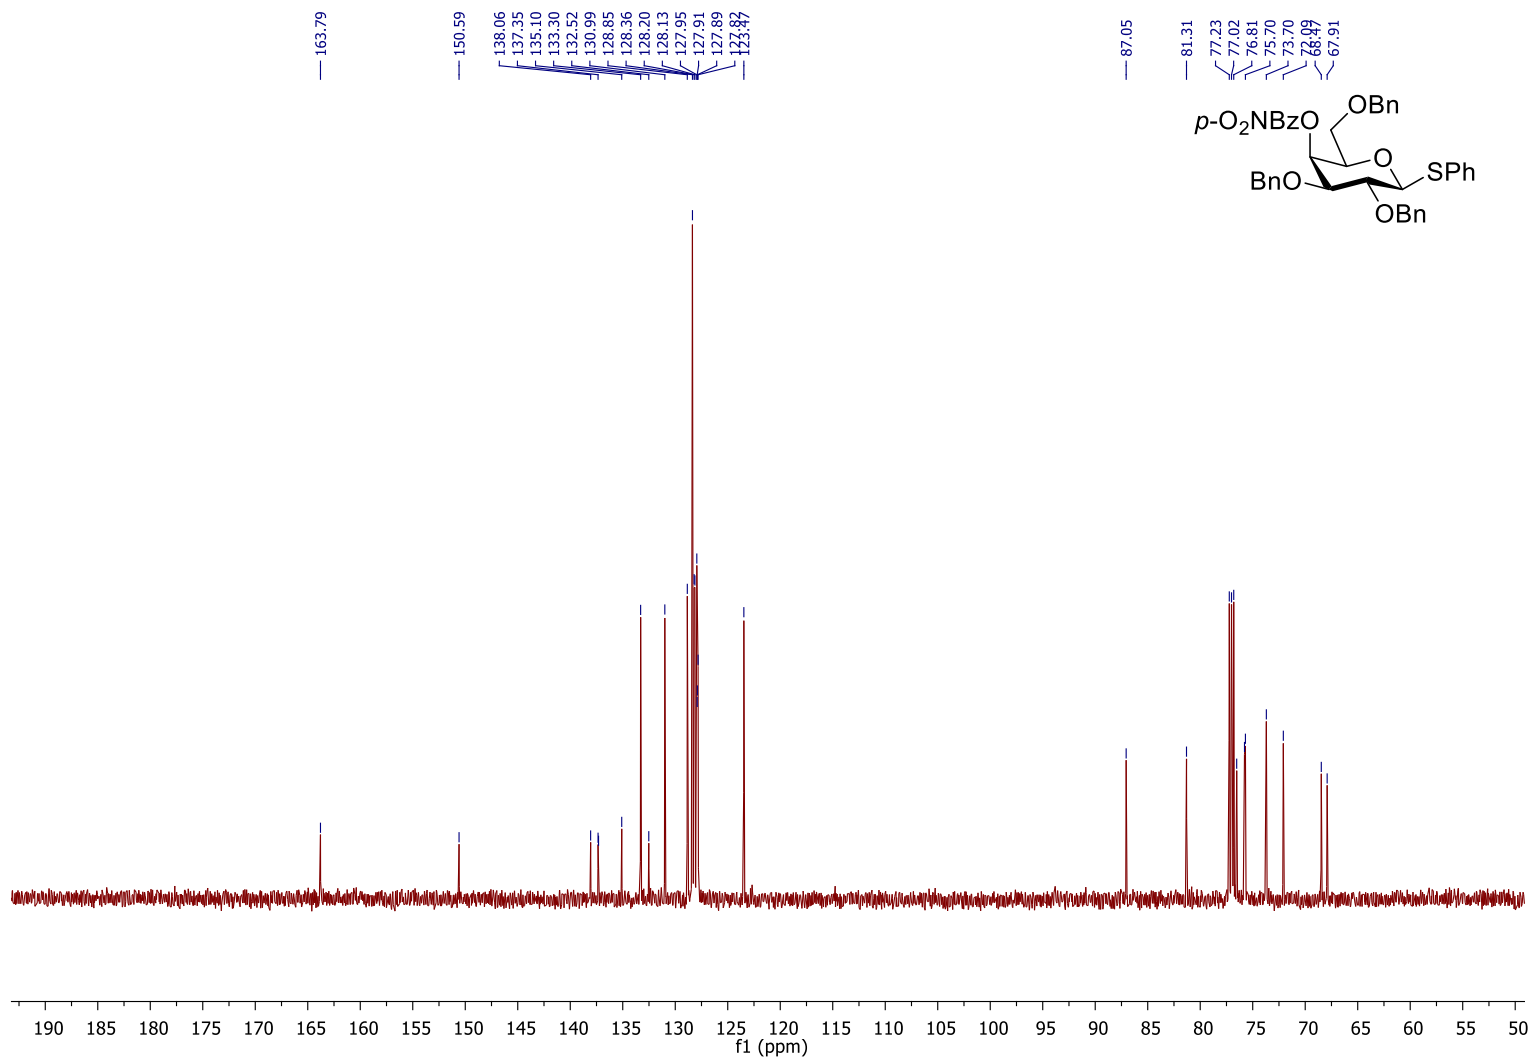

<sup>1</sup>H NMR (600 MHz, C<sub>6</sub>D<sub>6</sub>) Spectrum of Phenyl 4-*O*-(*p*-nitrobenzoyl)-2,3,6-tri-*O*-benzyl-1-thio-β-D-galactopyranoside (**20**)

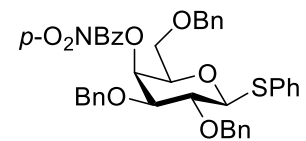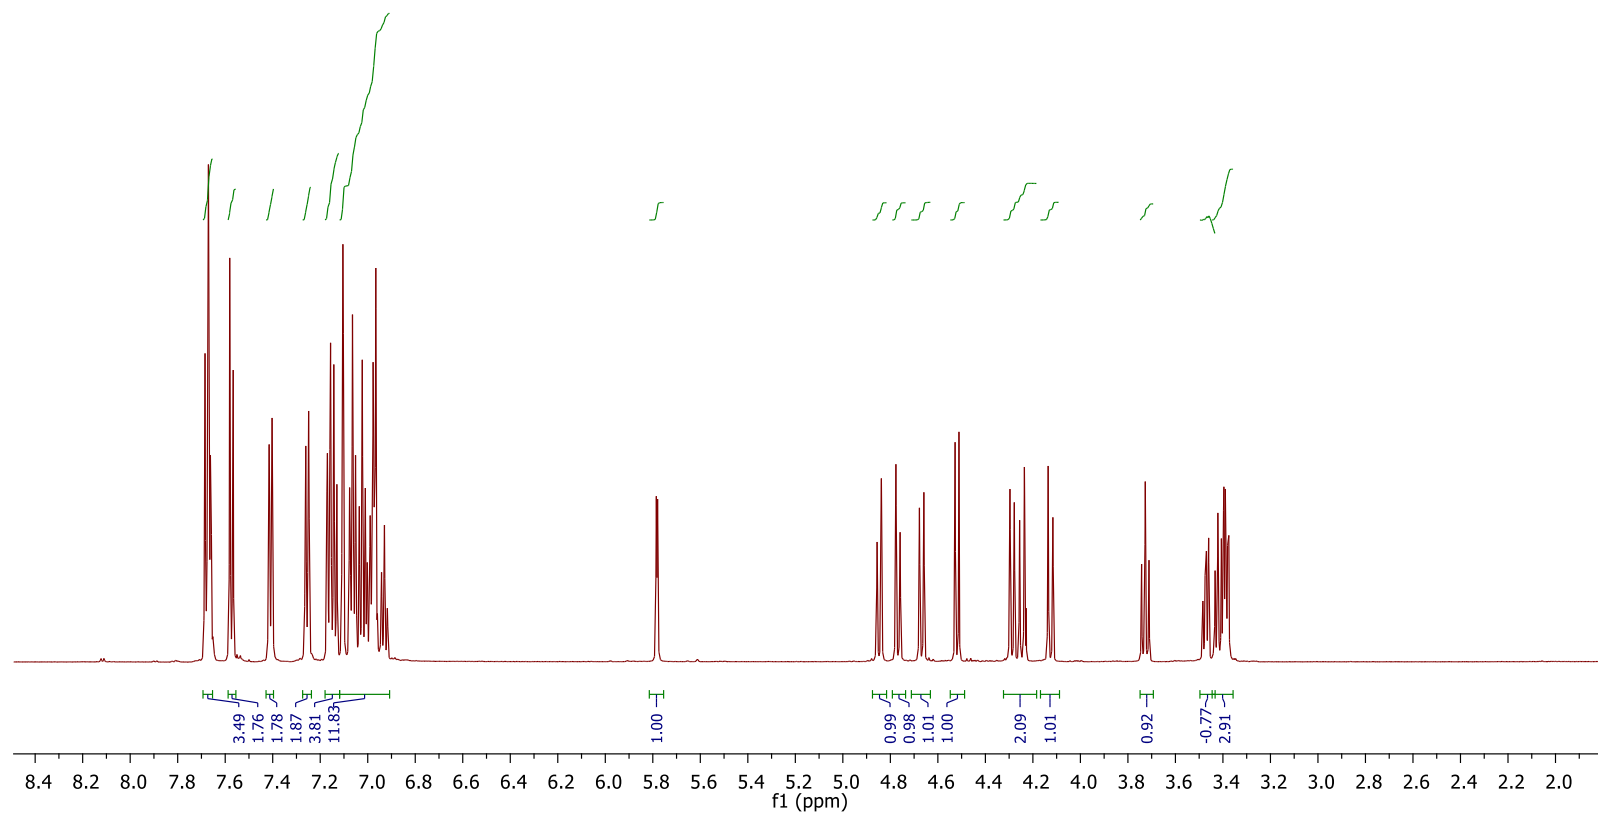

$^1\text{H}$  NMR (600 MHz,  $\text{CDCl}_3$ ) Spectrum of Phenyl 4-*O*-(*p*-nitrobenzoyl)-(6*S*)-[6- $^2\text{H}_1$ ]-2,3,6-tri-*O*-benzyl-1-thio- $\beta$ -D-galactopyranoside (**6S-D-20**)

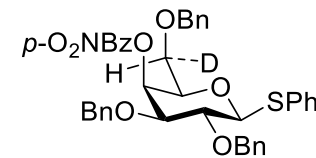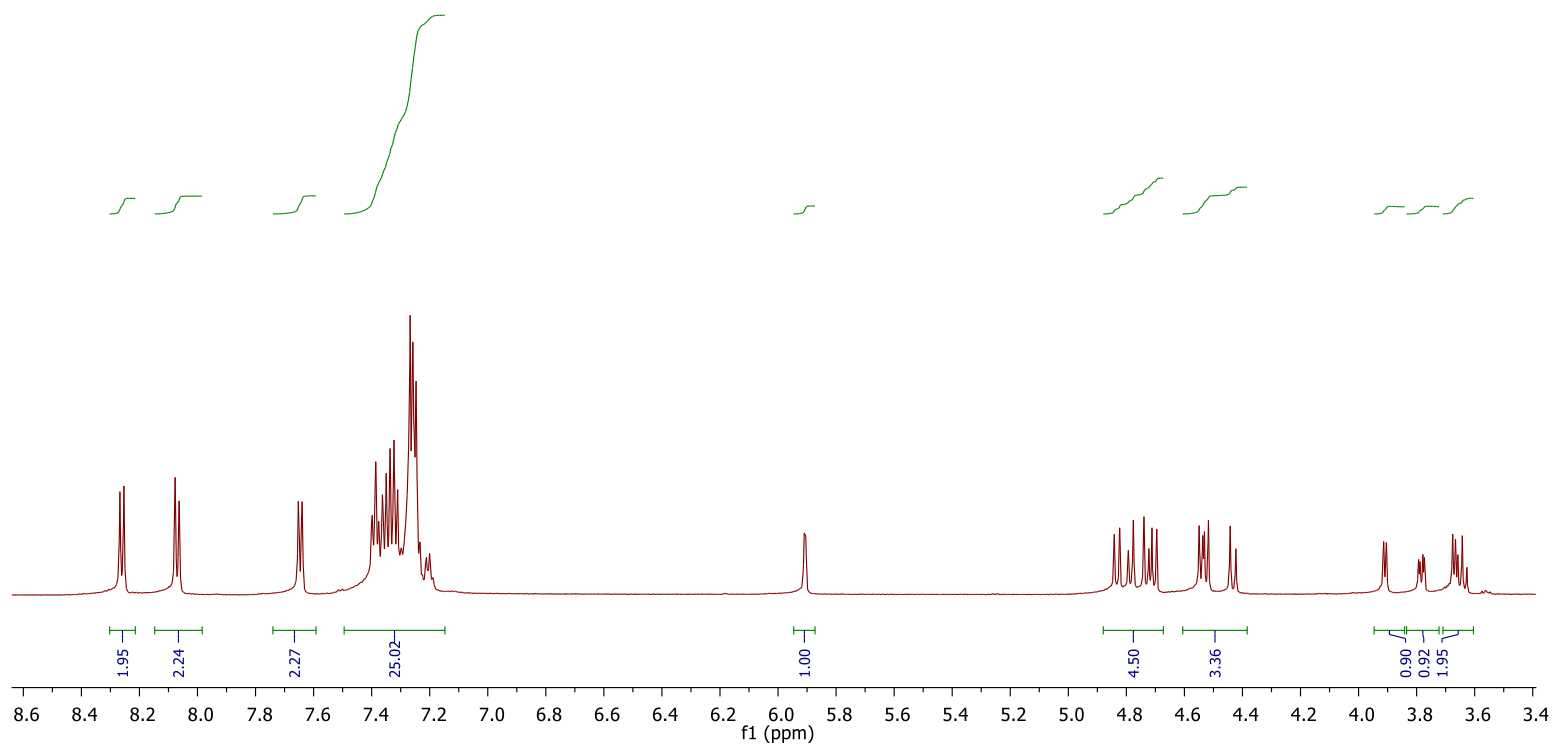

$^1\text{H}$  NMR (600 MHz,  $\text{C}_6\text{D}_6$ ) Spectrum of Phenyl 4-*O*-(*p*-nitrobenzoyl)-(6*S*)-[6- $^2\text{H}_1$ ]-2,3,6-tri-*O*-benzyl-1-thio- $\beta$ -D-galactopyranoside (**6S-D-20**)

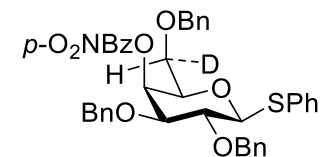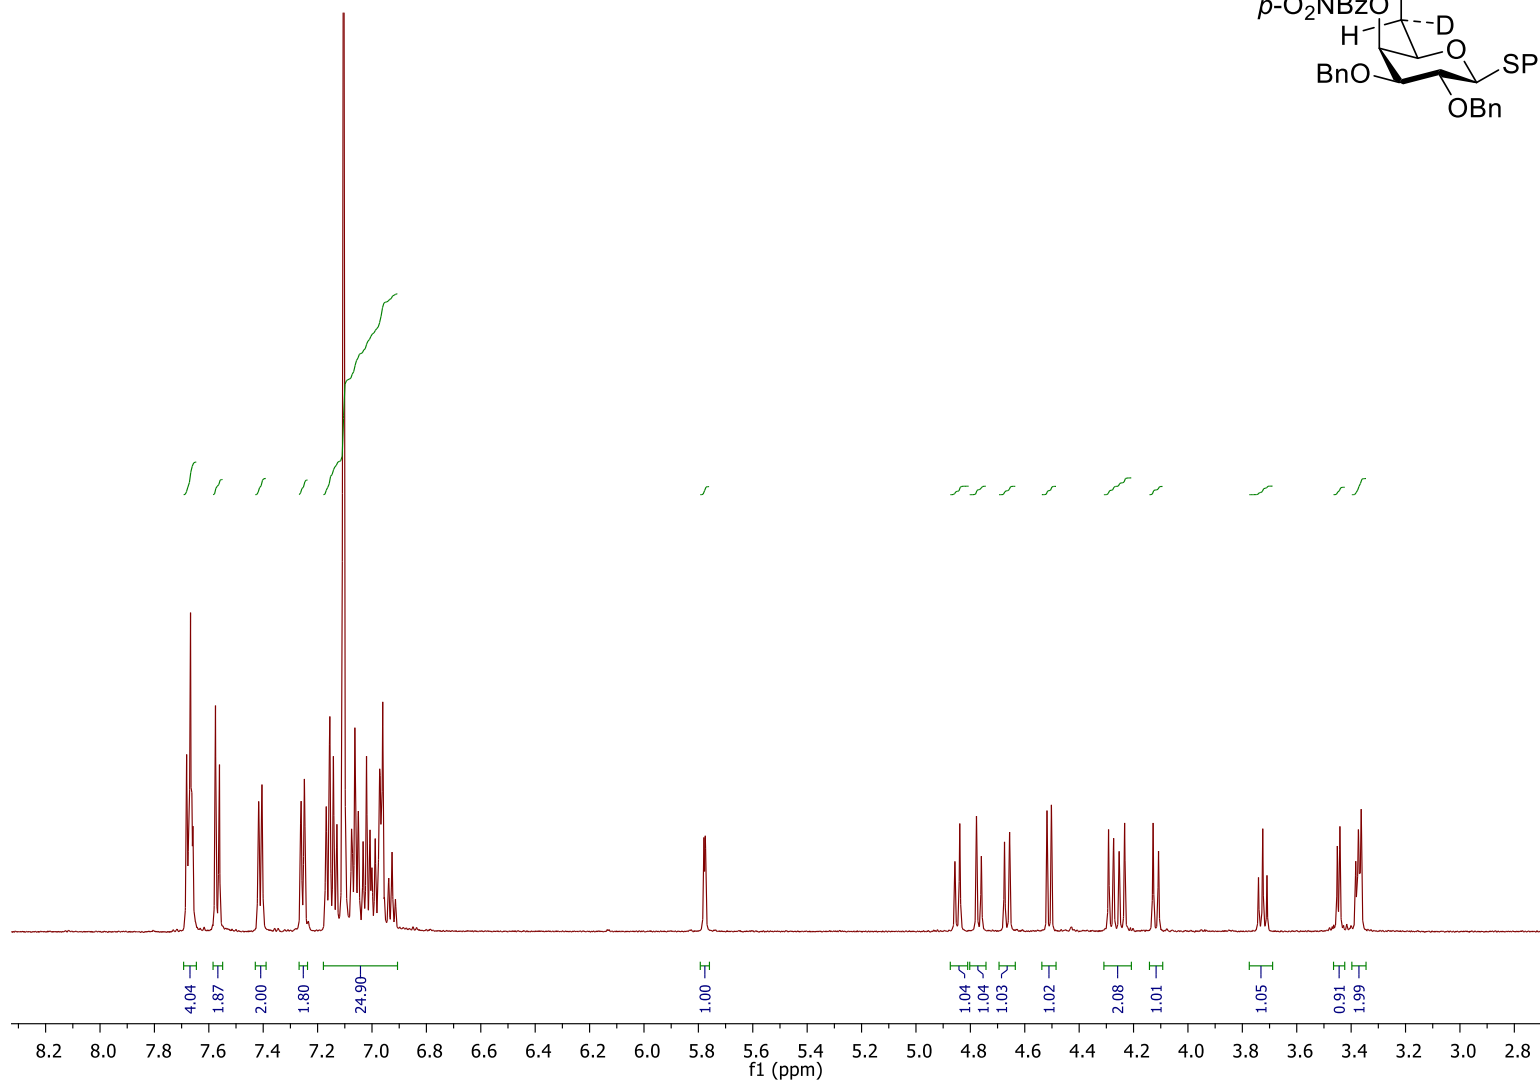



$^1\text{H}$  NMR (600 MHz,  $\text{CDCl}_3$ ) Spectrum of Phenyl 2,3,4,6-tetra-*O*-benzyl-1-thio- $\beta$ -D-galactopyranoside (**21**)

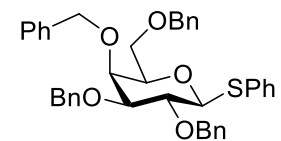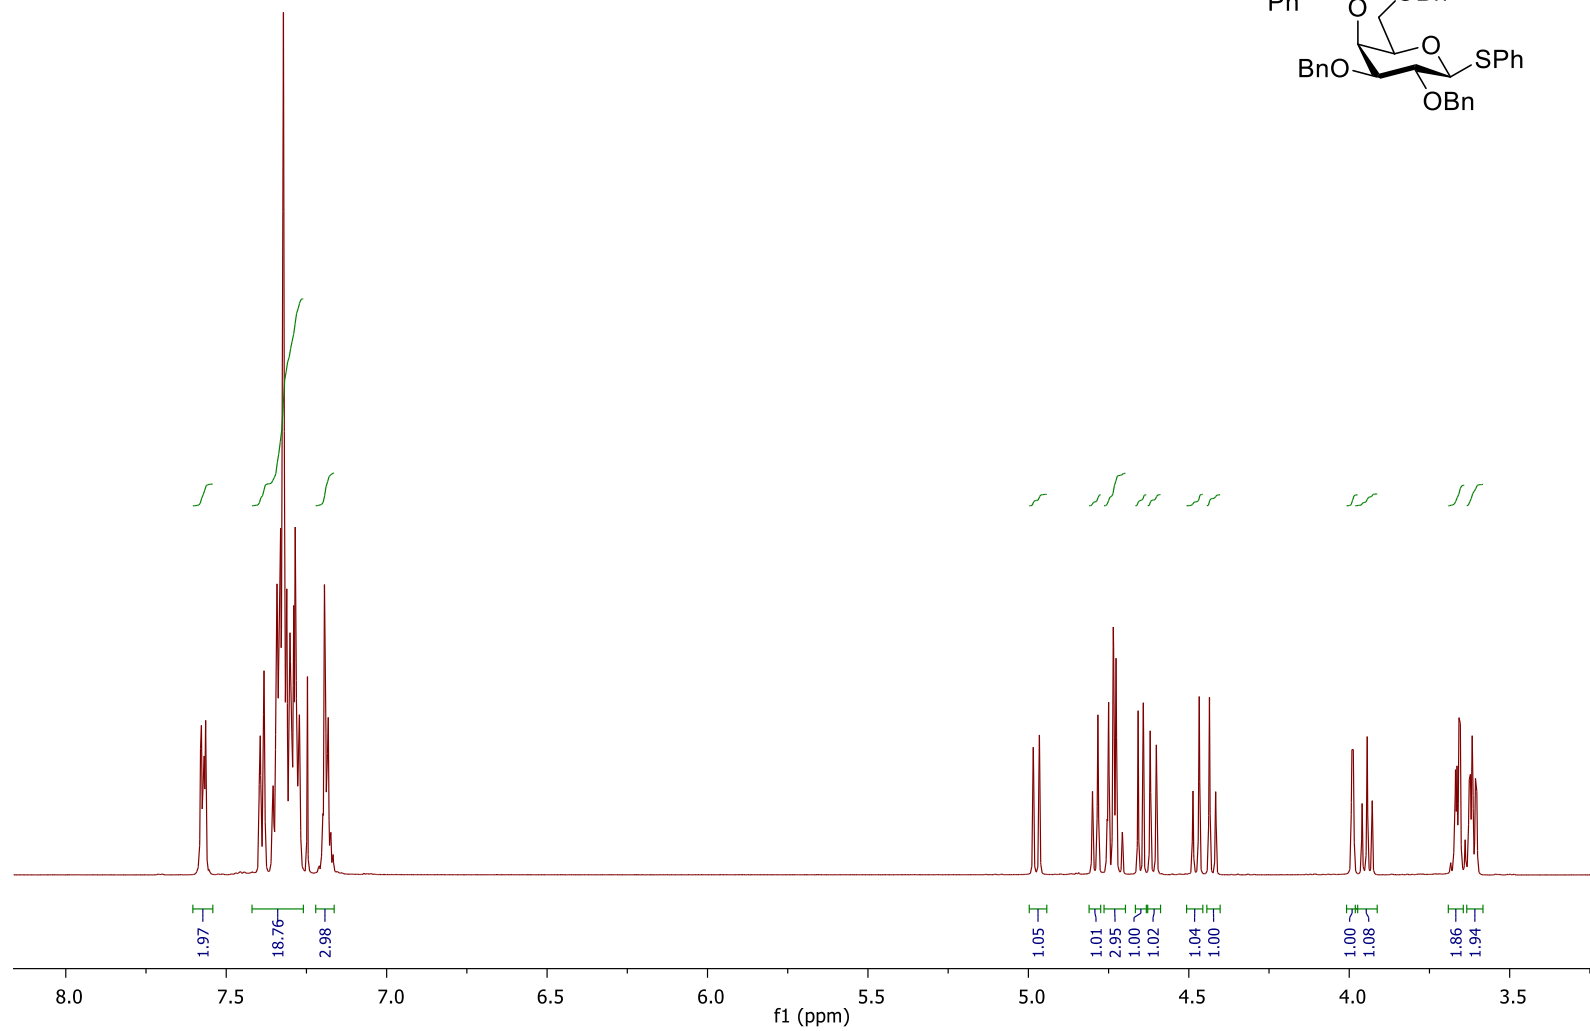

$^1\text{H}$  NMR (600 MHz,  $\text{C}_6\text{D}_6$ ) Spectrum of Phenyl 2,3,4,6-tetra-*O*-benzyl-1-thio- $\beta$ -D-galactopyranoside (**21**)

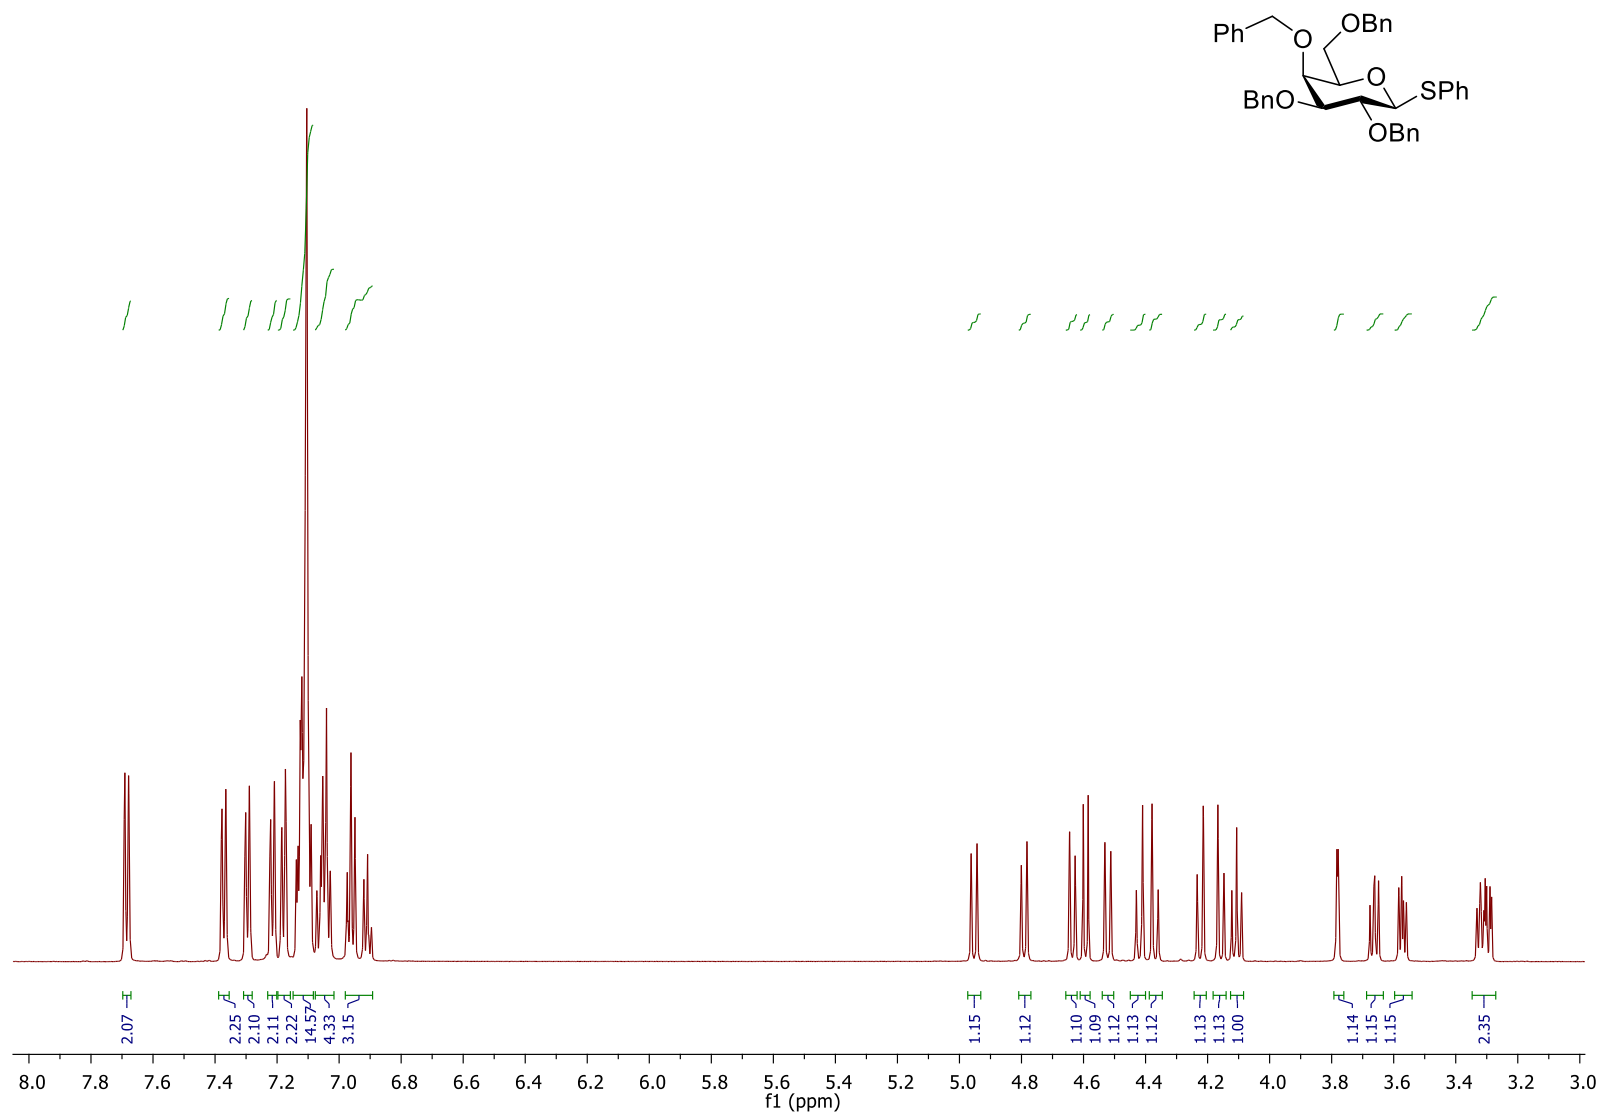

$^1\text{H}$  NMR (600 MHz,  $\text{CDCl}_3$ ) Spectrum of Phenyl (6*S*)-[6- $^2\text{H}_1$ ]-2,3,4,6-tetra-*O*-benzyl-1-thio- $\beta$ -D-galactopyranoside (**6S-D-21**)

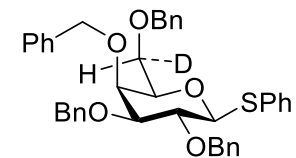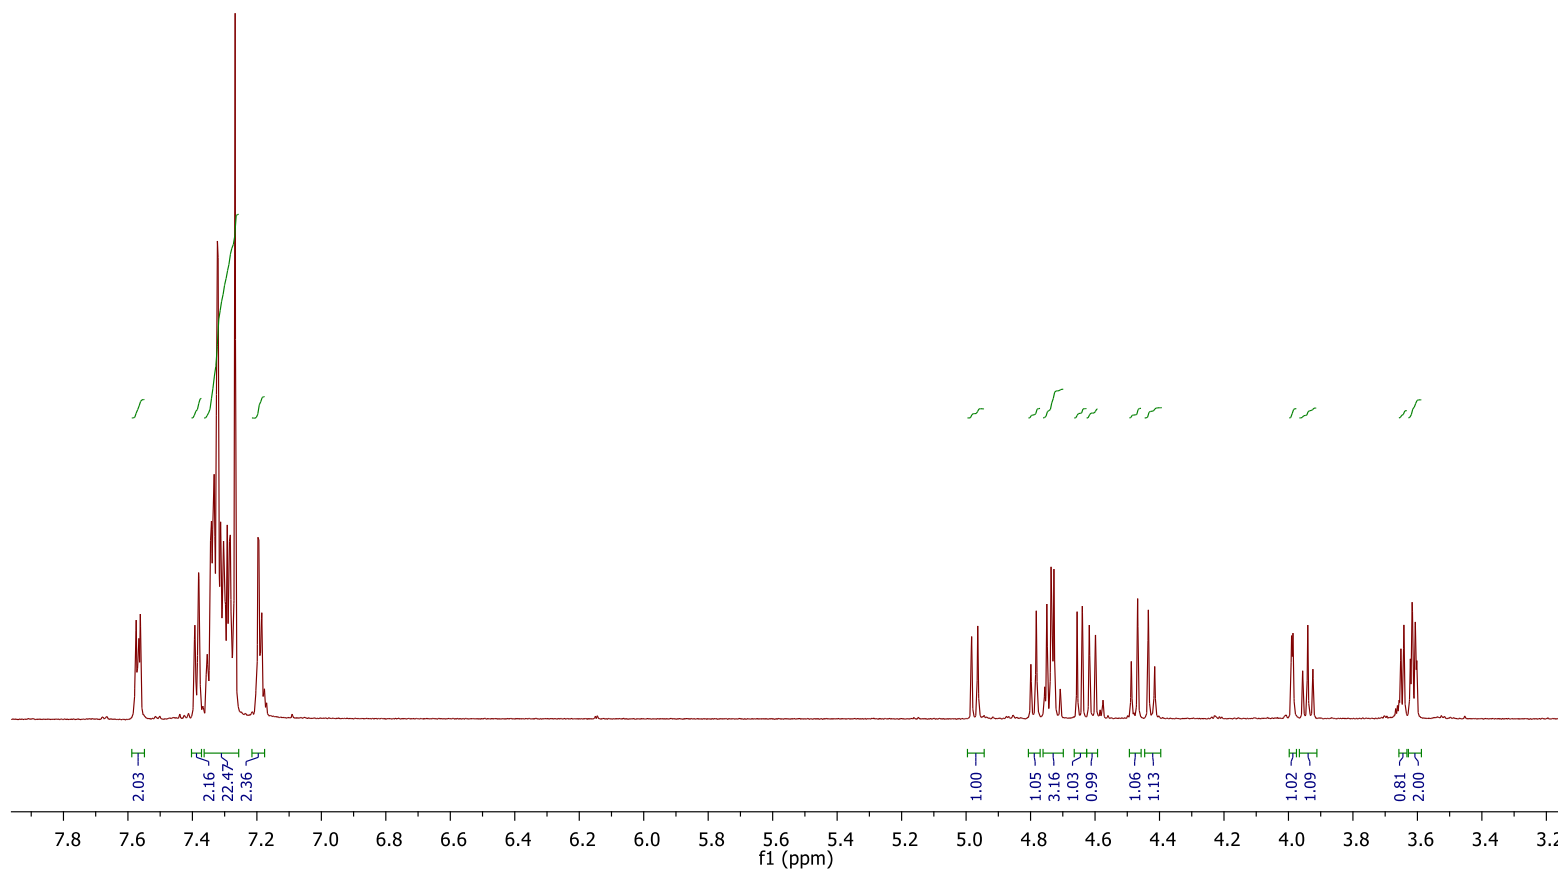

$^1\text{H}$  NMR (600 MHz,  $\text{C}_6\text{D}_6$ ) Spectrum of Phenyl (6*S*)-[6- $^2\text{H}_1$ ]-2,3,4,6-tetra-*O*-benzyl-1-thio- $\beta$ -D-galactopyranoside (**6S-D-21**)

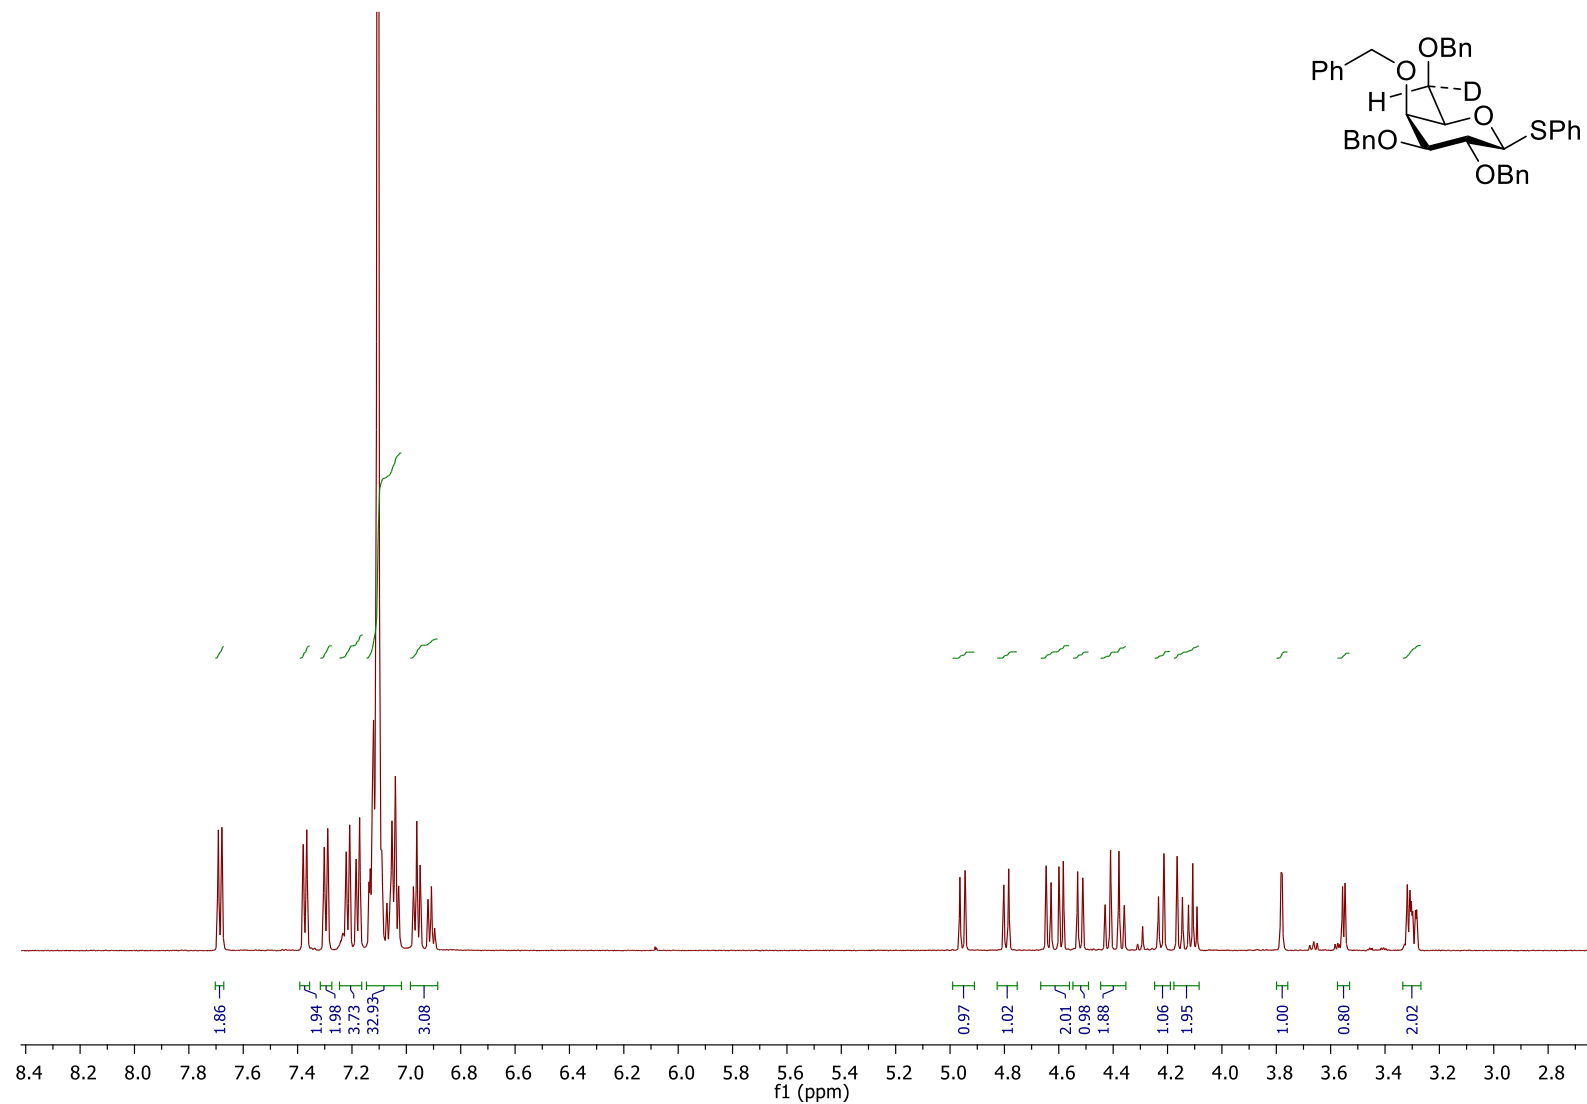

<sup>1</sup>H NMR (600 MHz, CDCl<sub>3</sub>) Spectrum of Phenyl 2,3,6-tri-*O*-benzyl-4-*O*-(1',1',1'-trifluoroethyl)-1-thio-β-D-galactopyranoside (**22**)

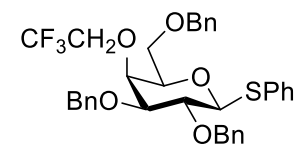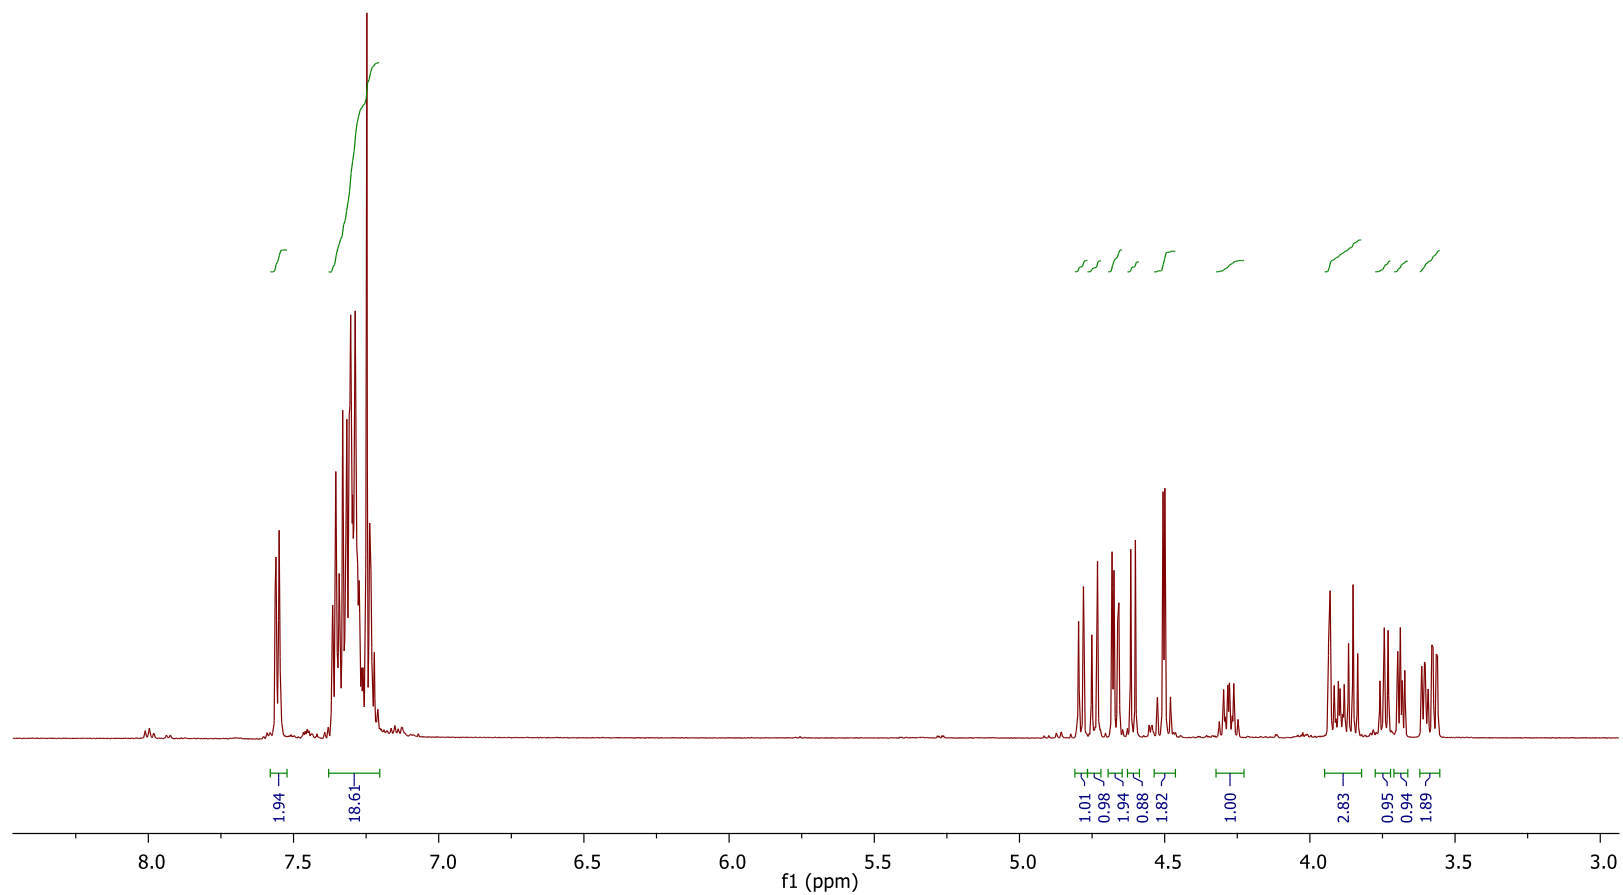

$^{13}\text{C}$  NMR (150 MHz,  $\text{CDCl}_3$ ) Spectrum of Phenyl 2,3,6-tri-*O*-benzyl-4-*O*-(1',1',1'-trifluoroethyl)-1-thio- $\beta$ -D-galactopyranoside (**22**)

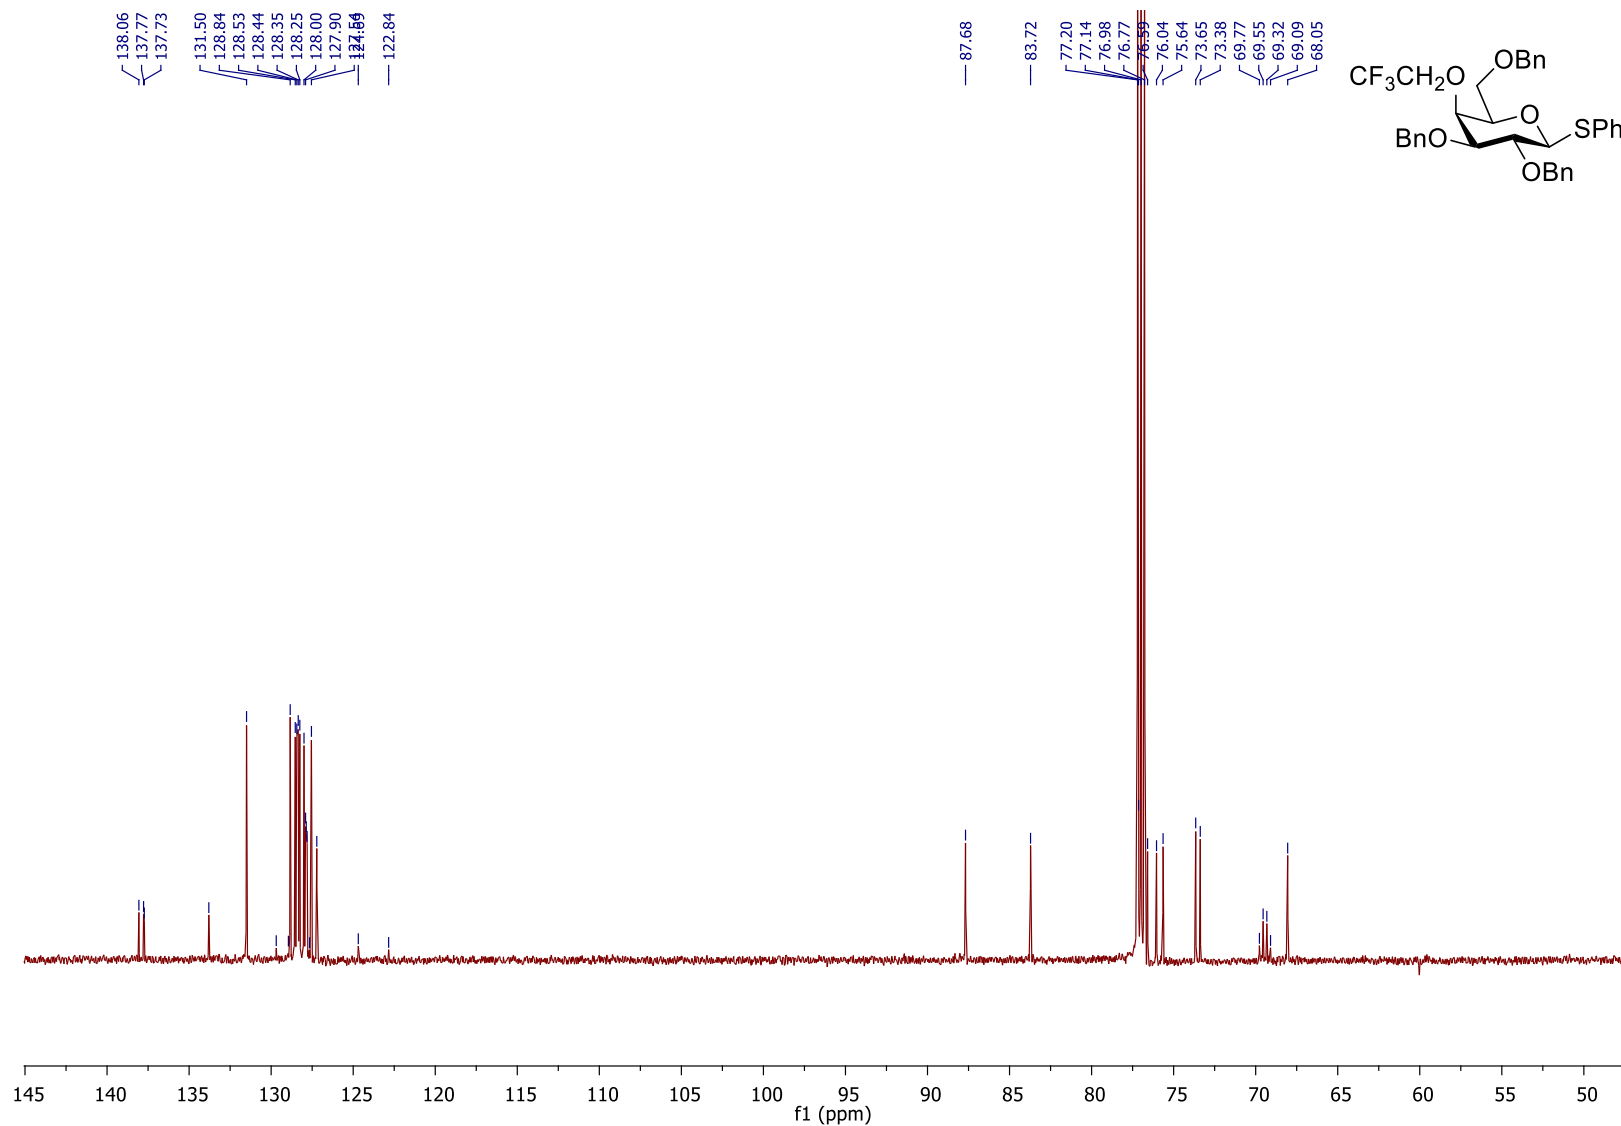

$^{19}\text{F}$  NMR (375 MHz,  $\text{CDCl}_3$ ) Spectrum of Phenyl 2,3,6-tri-*O*-benzyl-4-*O*-(1',1',1'-trifluoroethyl)-1-thio- $\beta$ -D-galactopyranoside (**22**)

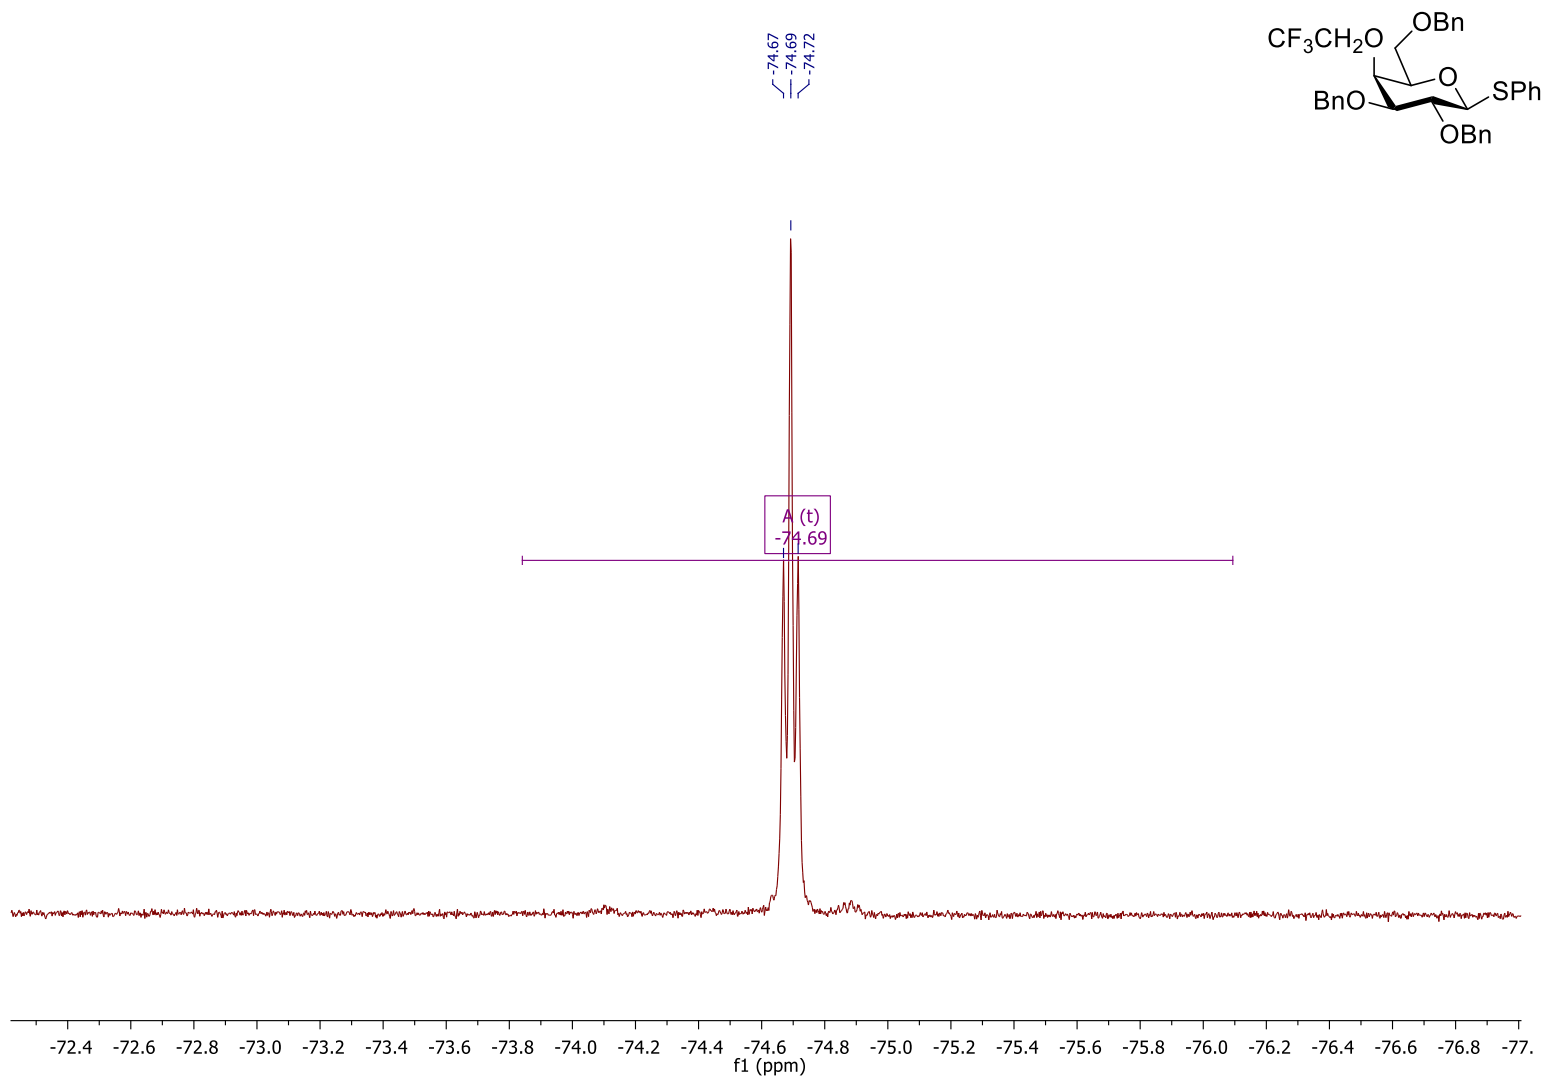

<sup>1</sup>H NMR (600 MHz, C<sub>6</sub>D<sub>6</sub>) Spectrum of Phenyl 2,3,6-tri-*O*-benzyl-4-*O*-(1',1',1'-trifluoroethyl)-1-thio-β-D-galactopyranoside (**22**)

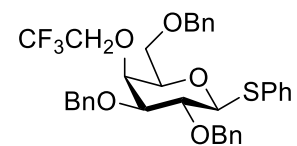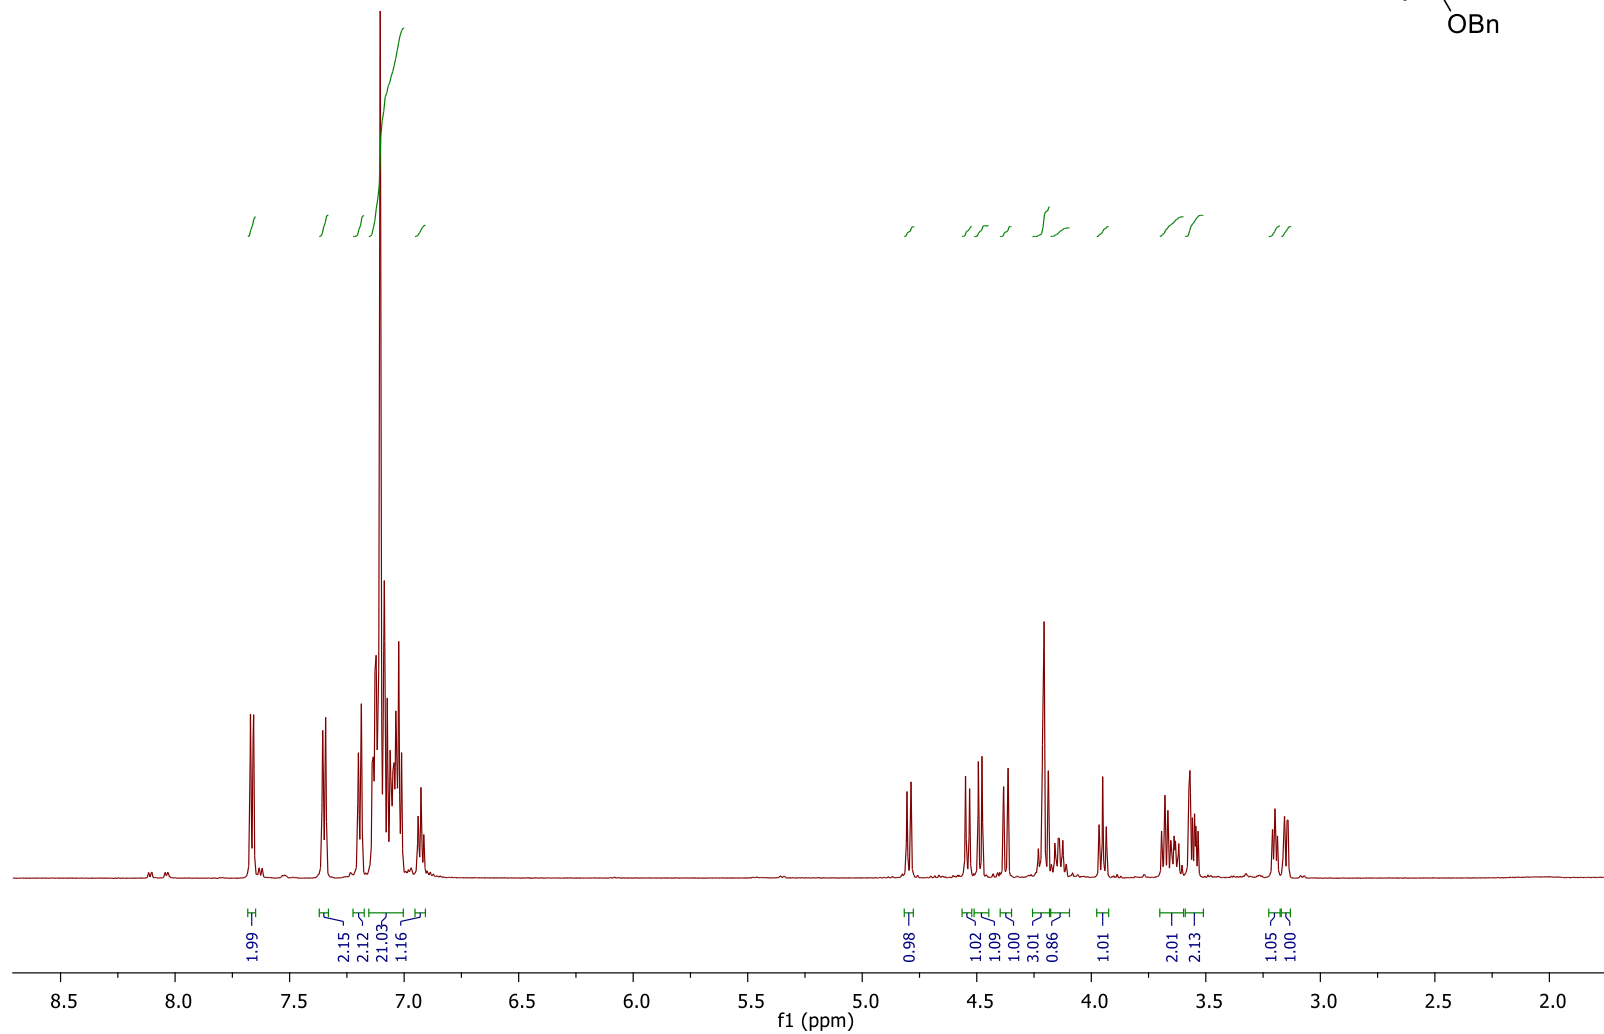



$^1\text{H}$  NMR (600 MHz,  $\text{CDCl}_3$ ) Spectrum of Phenyl (6*S*)-[6- $^2\text{H}_1$ ]-2,3,6-tri-*O*-benzyl-4-*O*-(1',1',1'-trifluoroethyl)-1-thio- $\beta$ -D-galactopyranoside (**6S-D-22**)

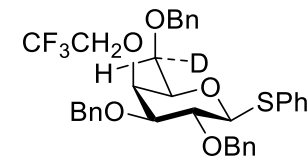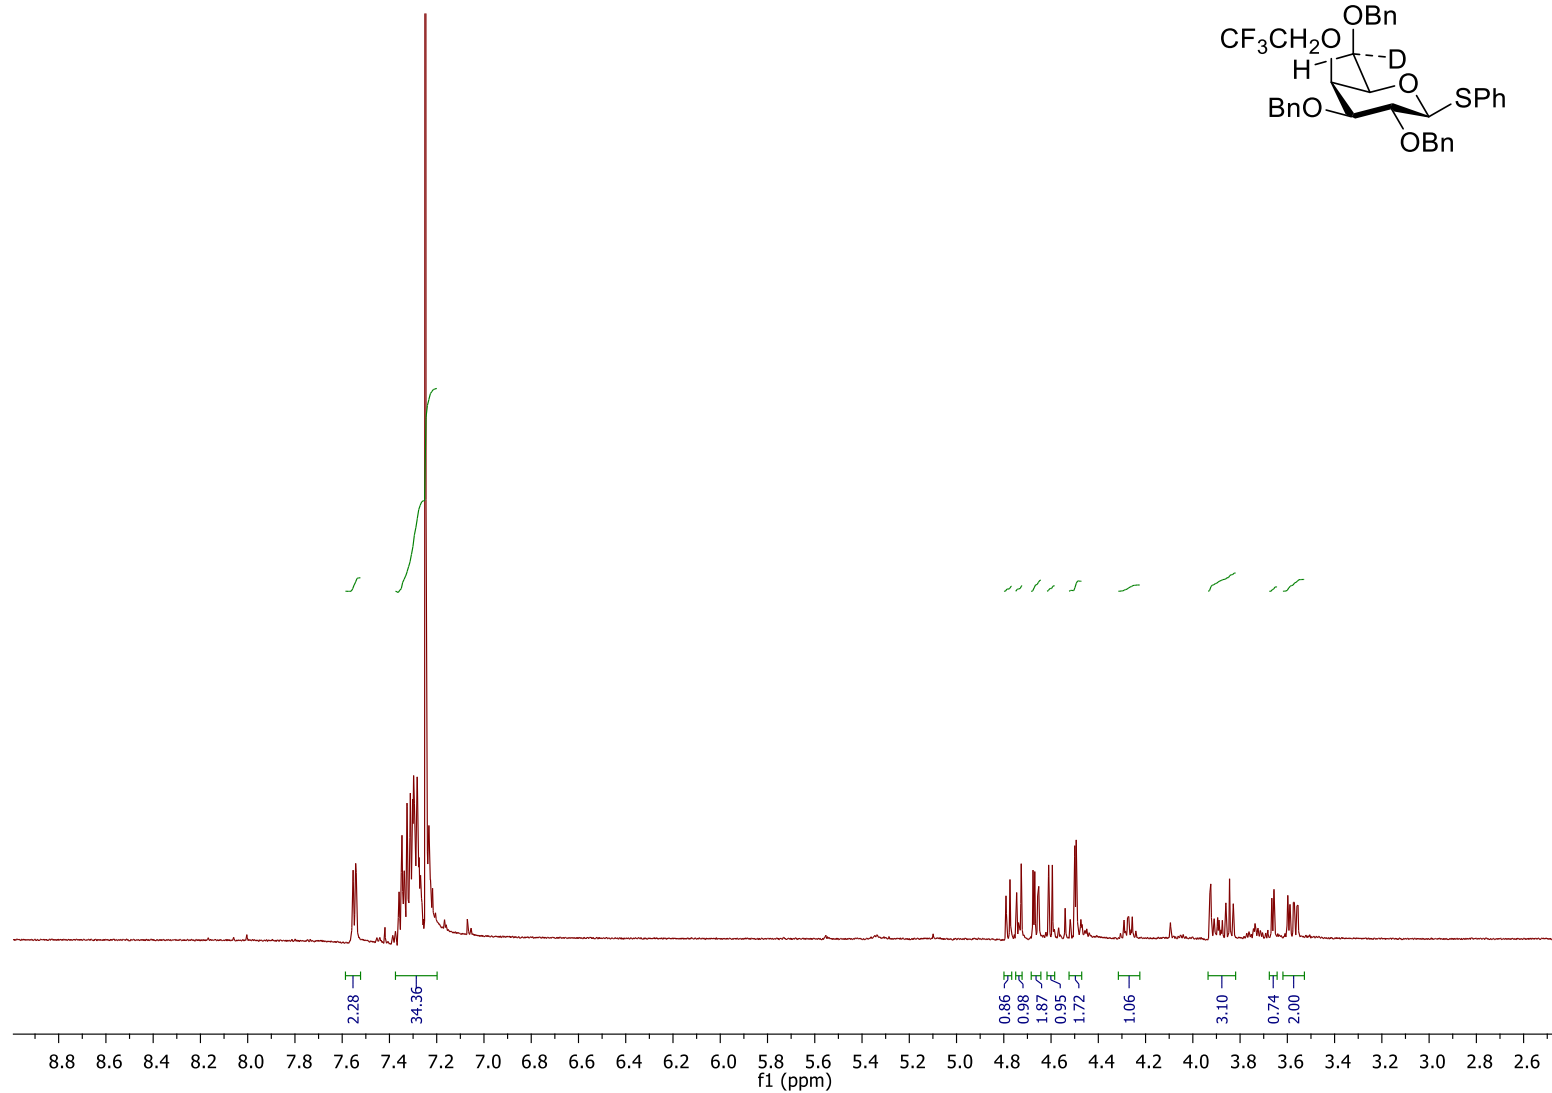

$^1\text{H}$  NMR (600 MHz,  $\text{C}_6\text{D}_6$ ) Spectrum of Phenyl (6*S*)-[6- $^2\text{H}_1$ ]-2,3,6-tri-*O*-benzyl-4-*O*-(1',1',1'-trifluoroethyl)-1-thio- $\beta$ -D-galactopyranoside (**6S-D-22**)

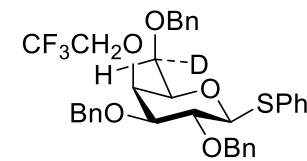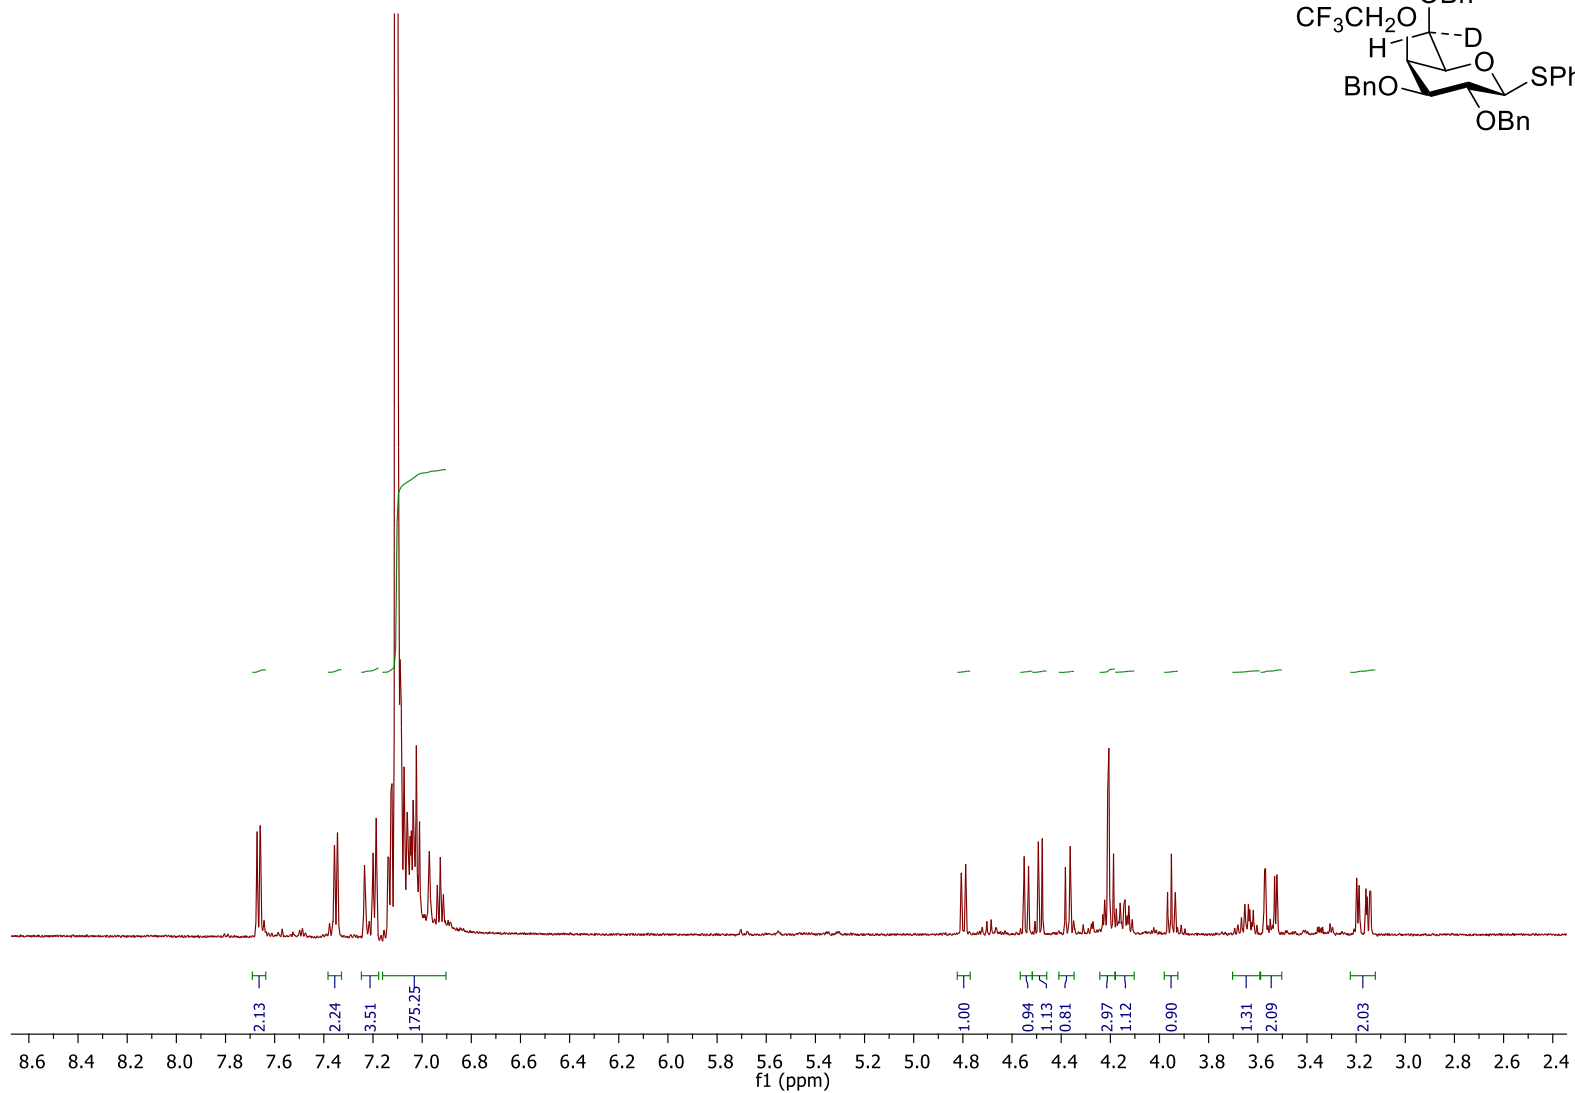

$^1\text{H}$  NMR (600 MHz,  $\text{CDCl}_3$ ) Spectrum of Phenyl 4-*O*-acetyl-2,3,6-tri-*O*-benzyl-1-thio- $\beta$ -D-glucopyranoside (**23**)

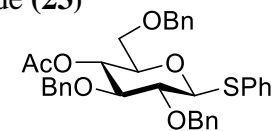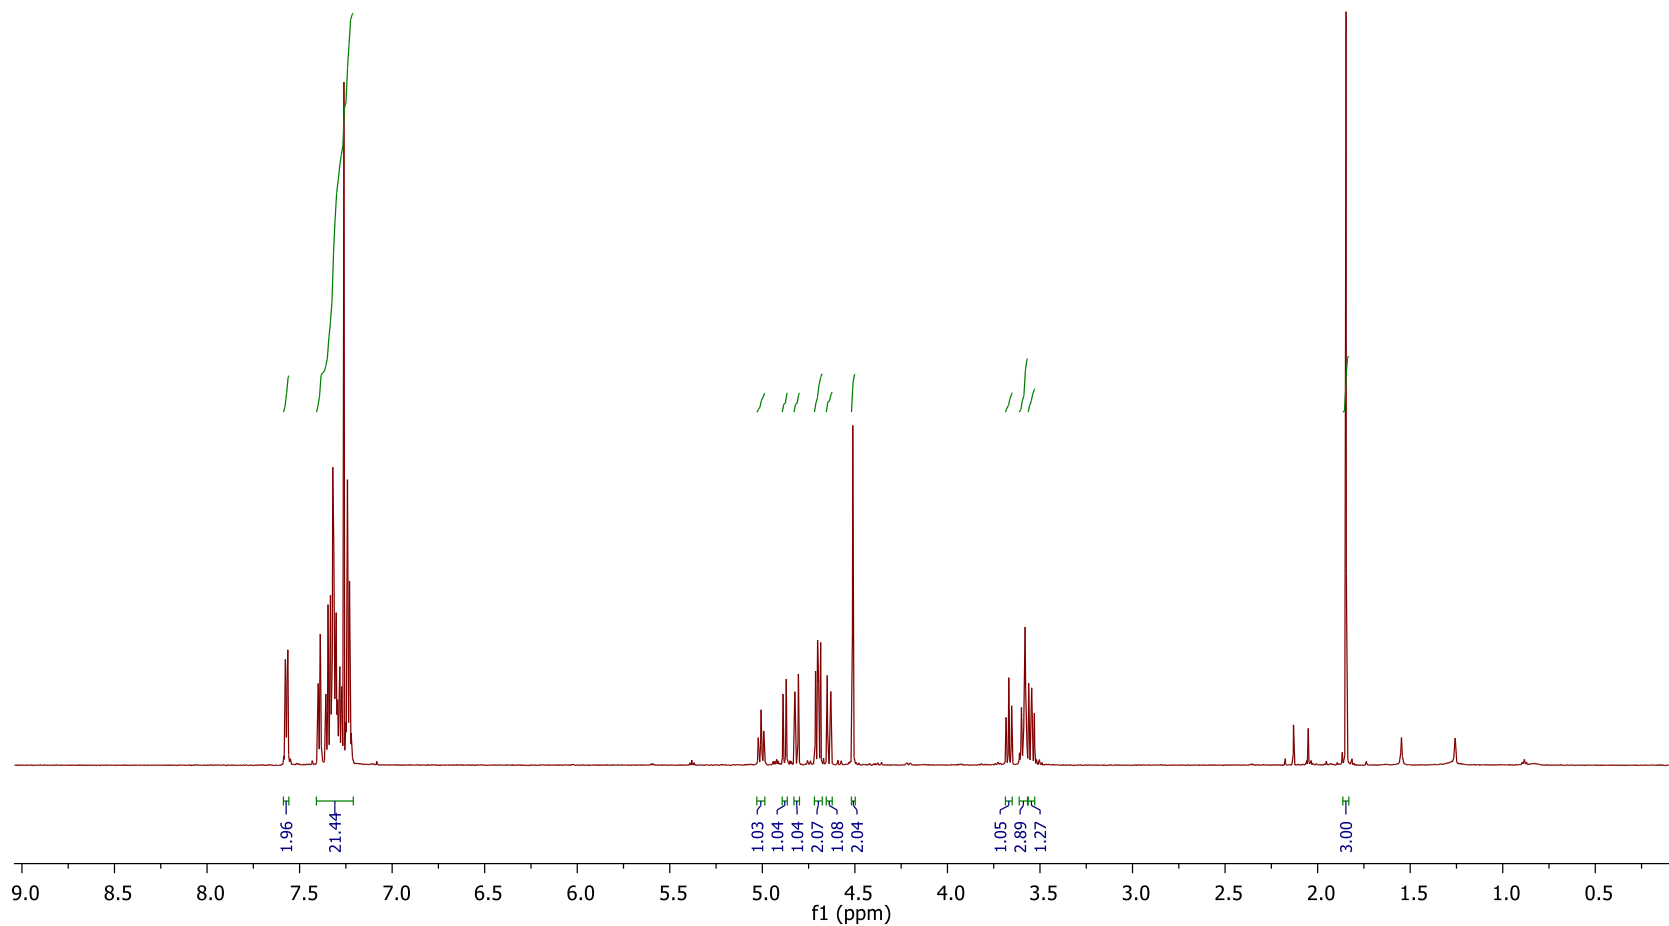

$^1\text{H}$  NMR (600 MHz,  $\text{C}_6\text{D}_6$ ) Spectrum of Phenyl 4-*O*-acetyl-2,3,6-tri-*O*-benzyl-1-thio- $\beta$ -D-glucopyranoside (**23**)

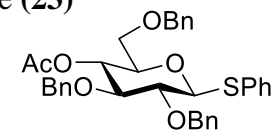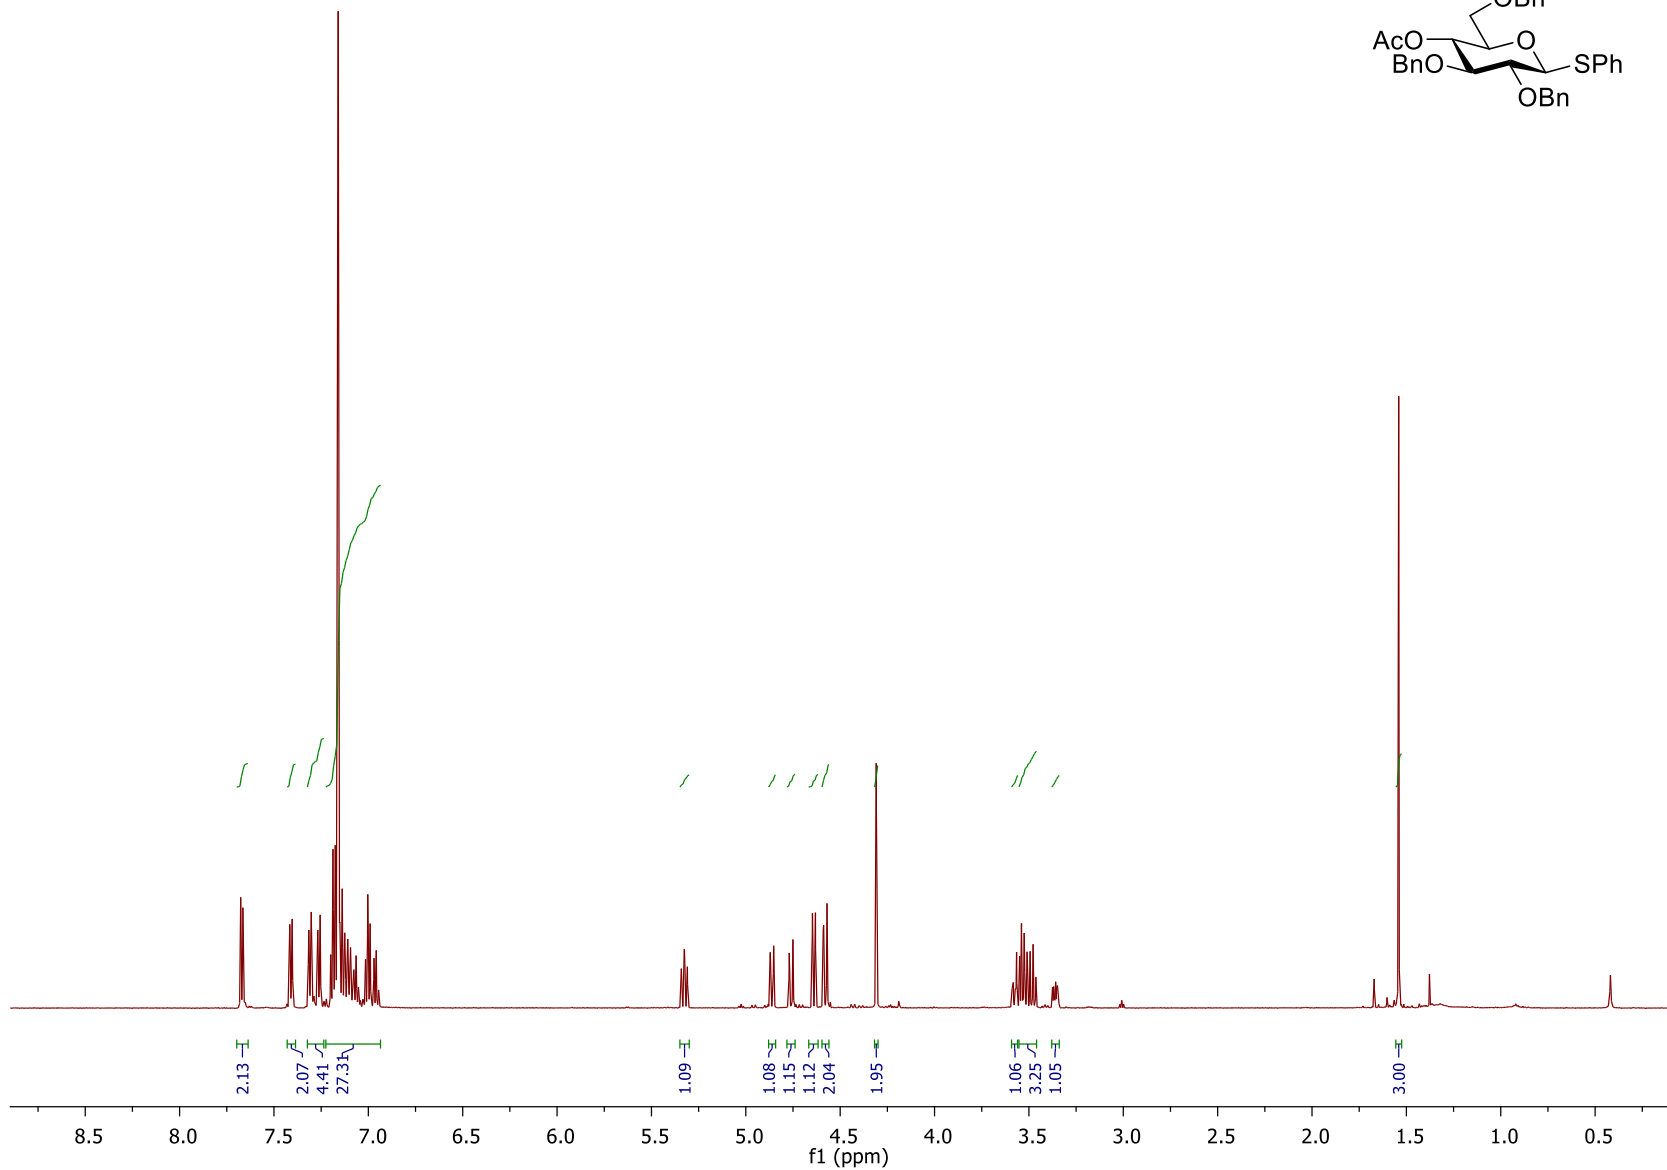

$^1\text{H}$  NMR (600 MHz,  $\text{CDCl}_3$ ) Spectrum of Phenyl 2,3,6-tri-*O*-benzyl-4-*O*-trifluoroacetyl-1-thio- $\beta$ -D-glucopyranoside (**24**)

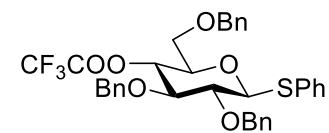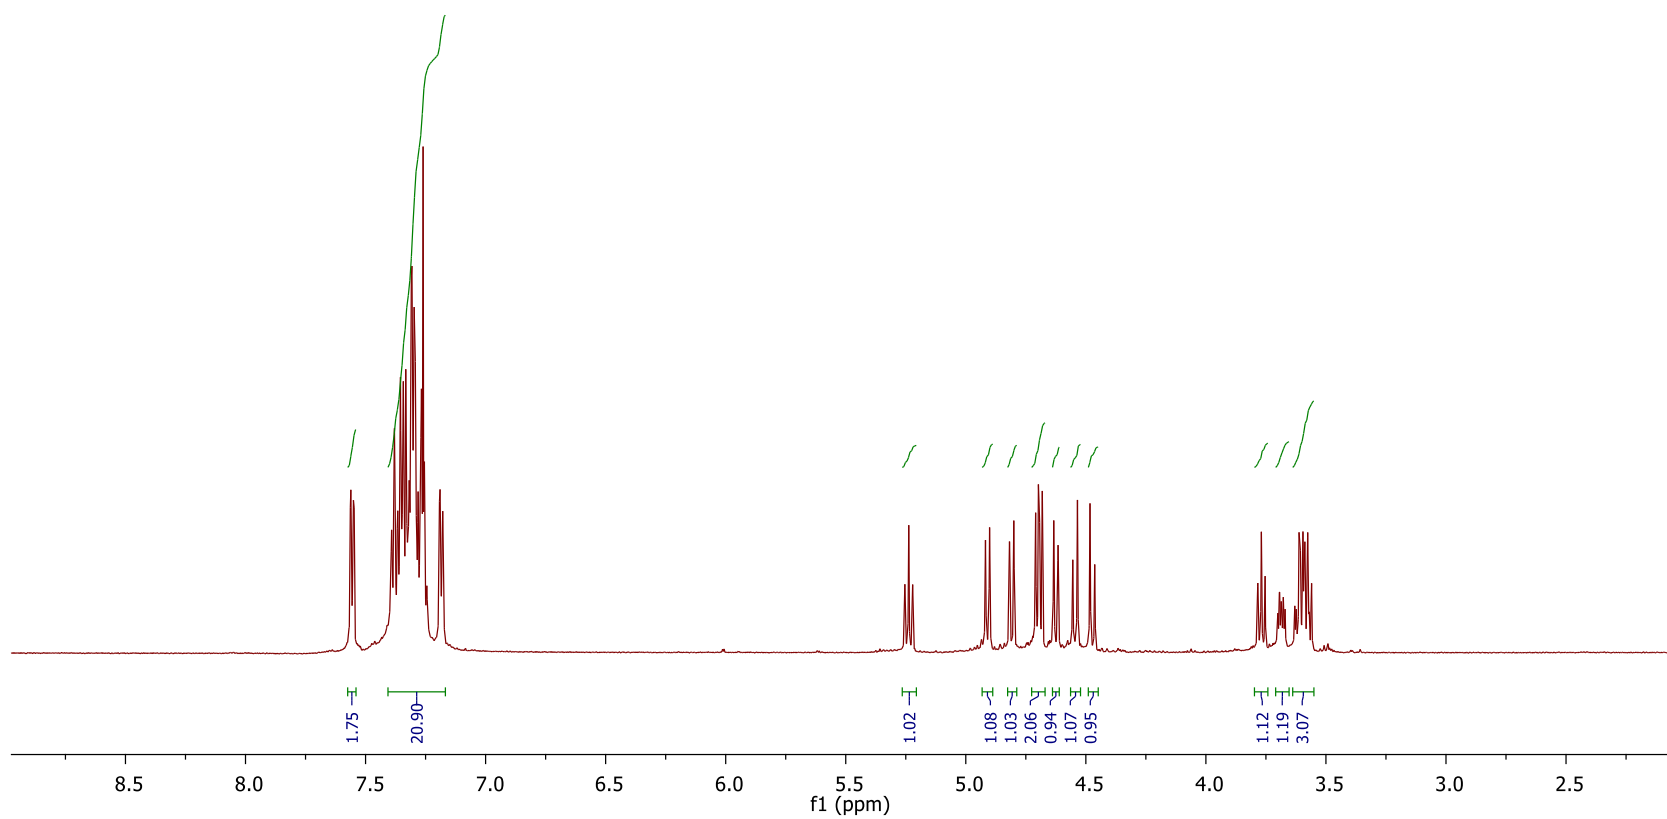

<sup>13</sup>C NMR (150 MHz, CDCl<sub>3</sub>) Spectrum of Phenyl 2,3,6-tri-*O*-benzyl-4-*O*-trifluoroacetyl-1-thio-β-D-glucopyranoside (**24**)

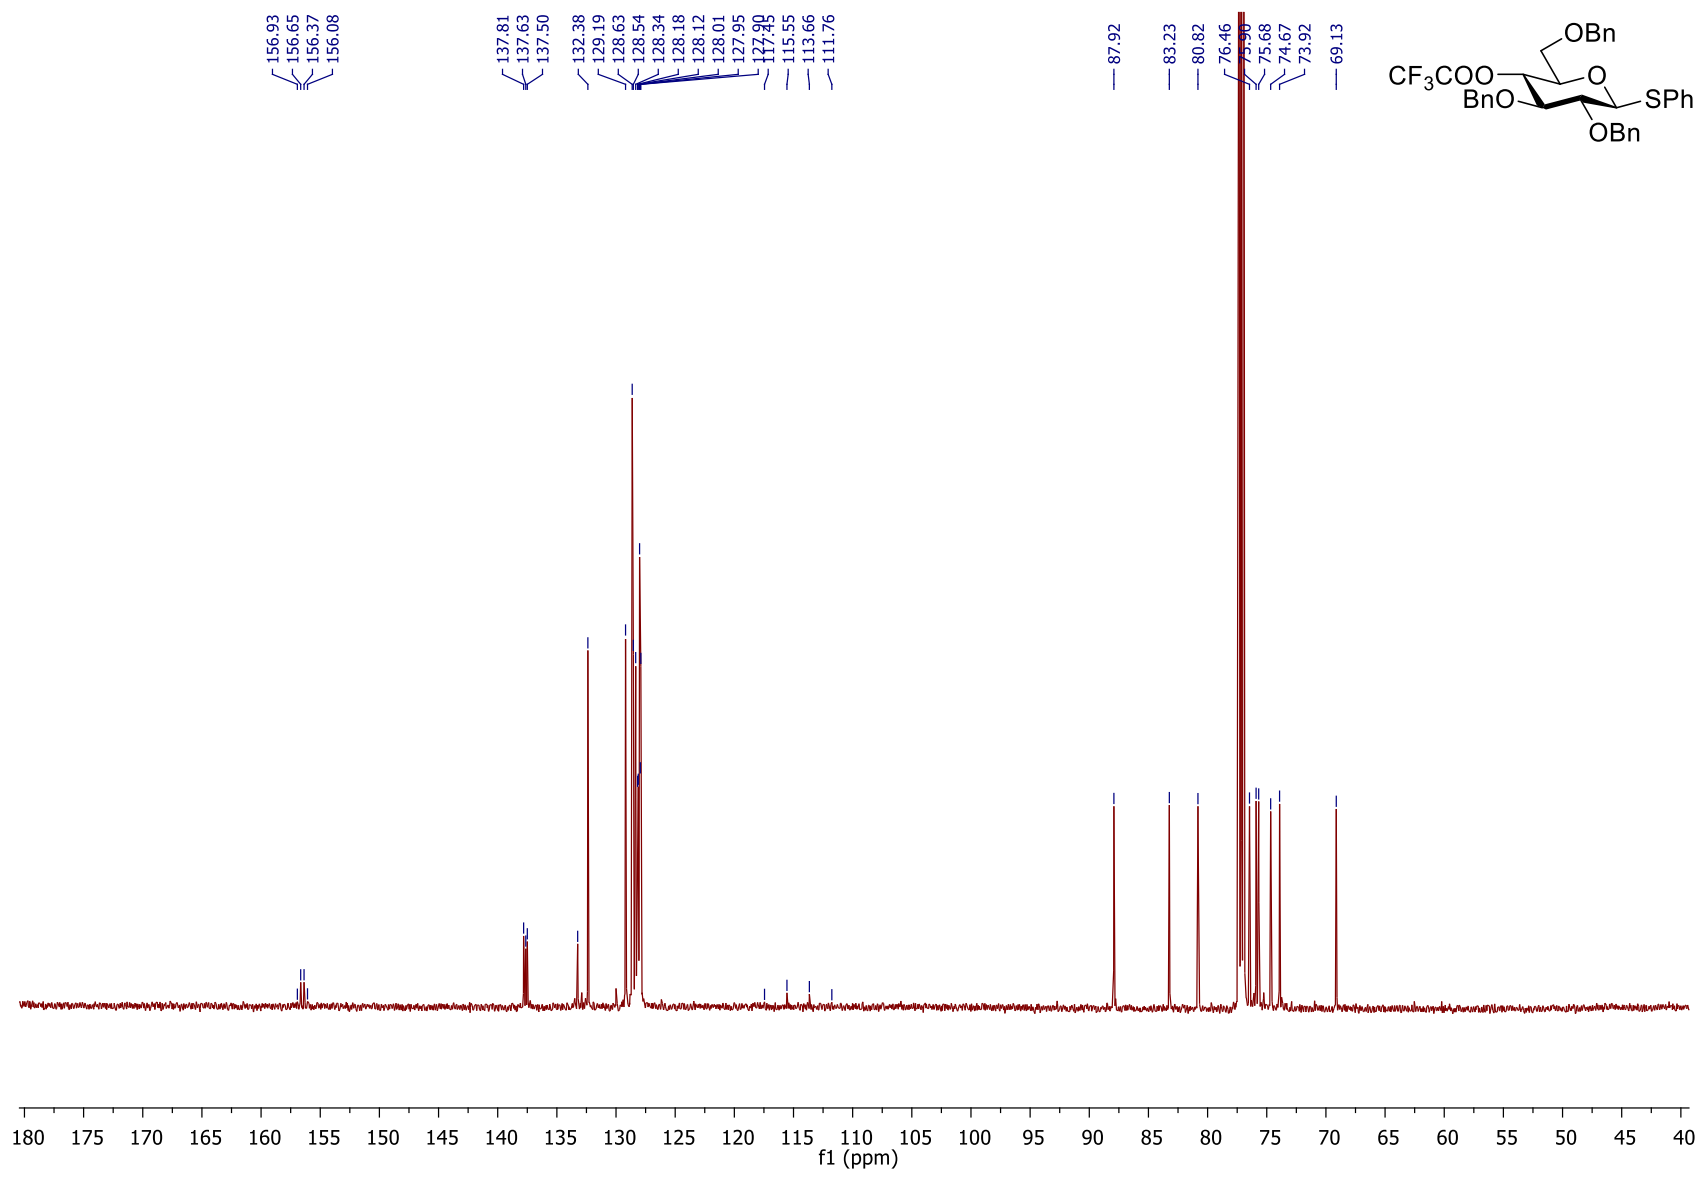

<sup>19</sup>F NMR (376 MHz, CDCl<sub>3</sub>) Spectrum of Phenyl 2,3,6-tri-*O*-benzyl-4-*O*-trifluoroacetyl-1-thio-β-*D*-glucopyranoside (**24**)

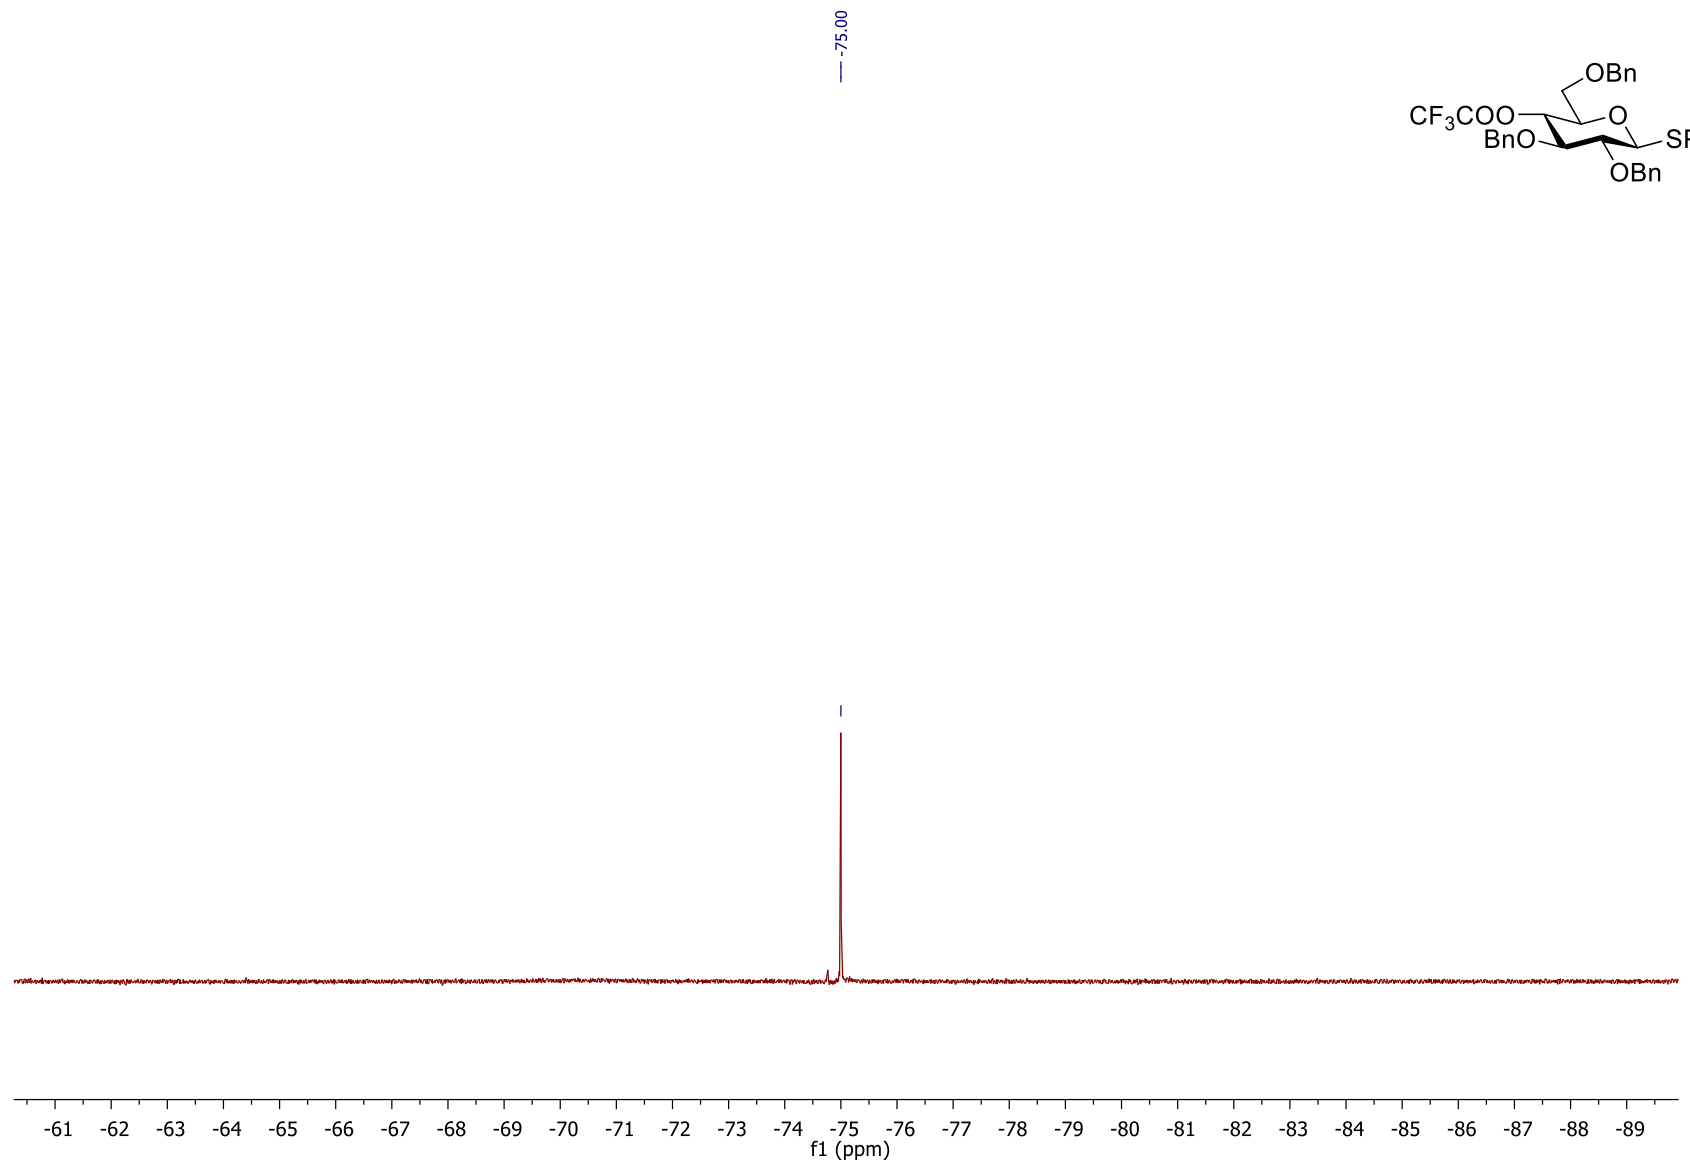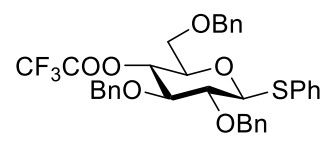

$^1\text{H}$  NMR (600 MHz,  $\text{C}_6\text{D}_6$ ) Spectrum of Phenyl 2,3,6-tri-*O*-benzyl-4-*O*-trifluoroacetyl-1-thio- $\beta$ -D-glucopyranoside (**24**)

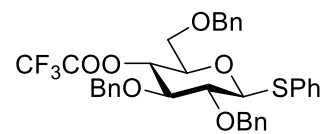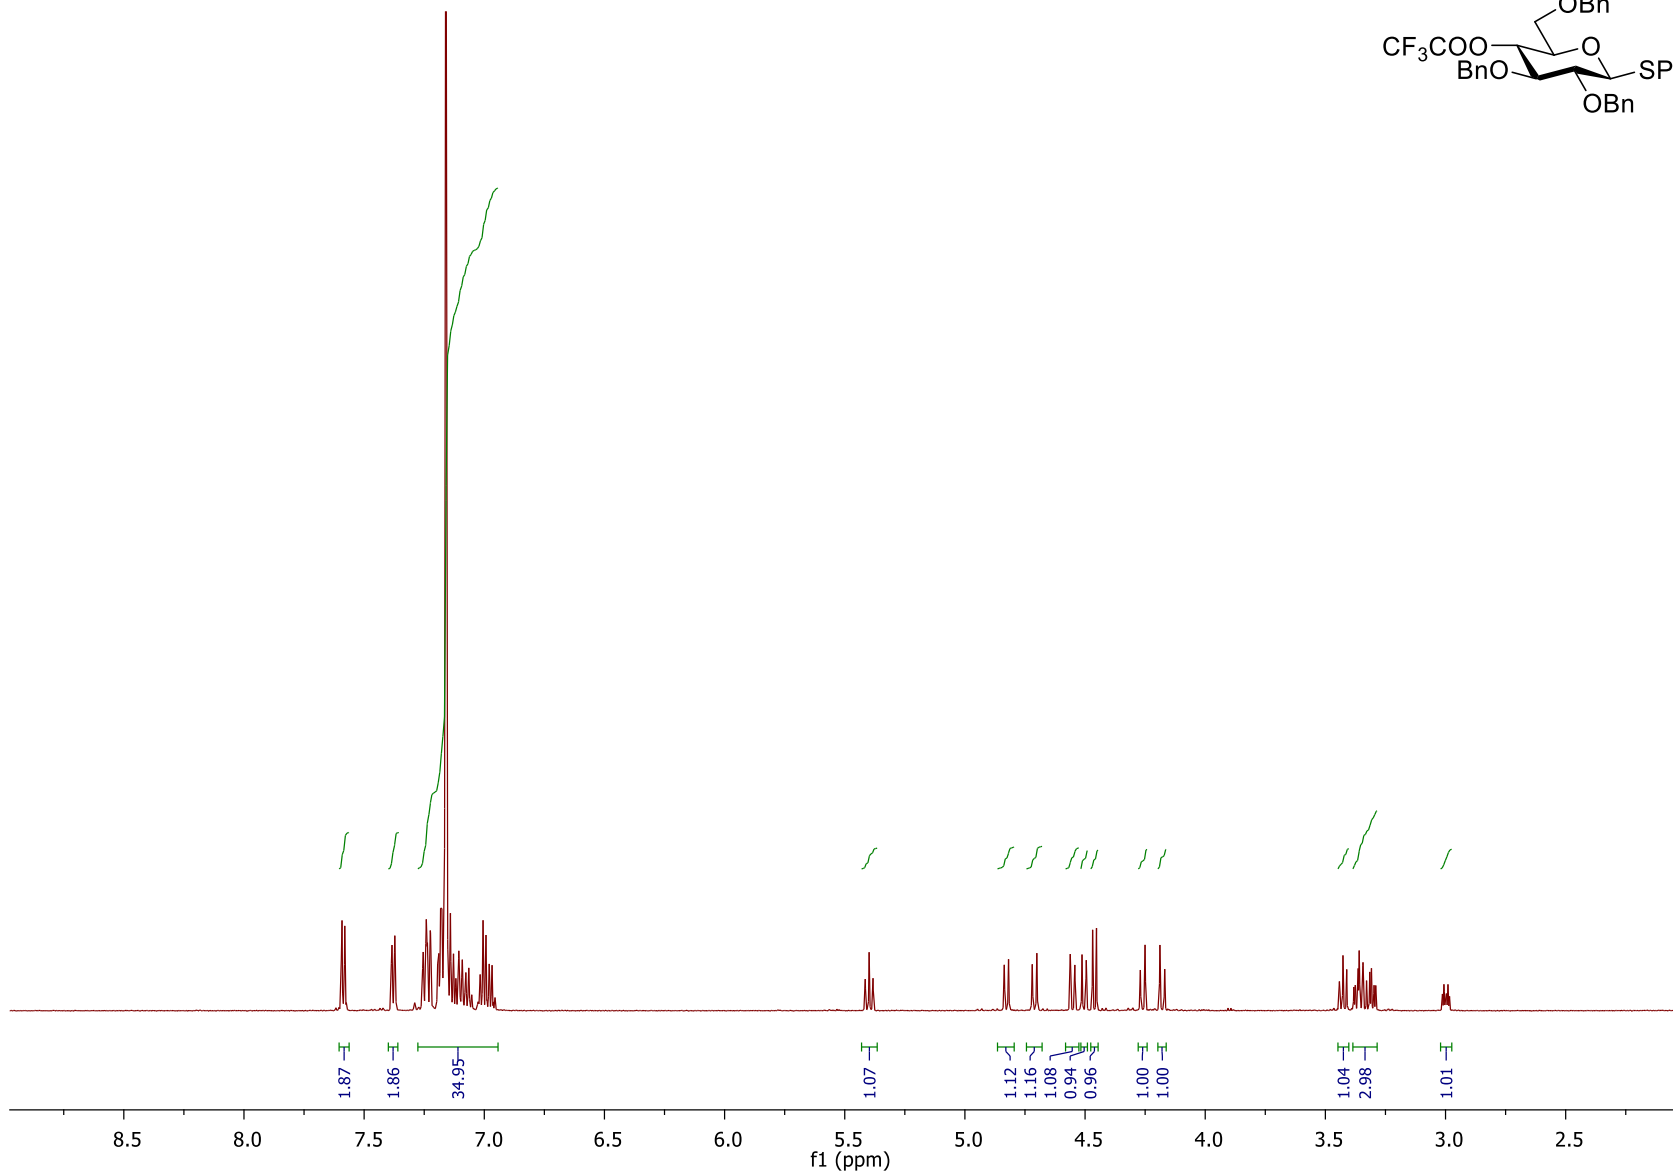



$^1\text{H}$  NMR (600 MHz,  $\text{CDCl}_3$ ) Spectrum of Phenyl 4-*O*-benzoyl-2,3,6-tri-*O*-benzyl-1-thio- $\beta$ -D-glucopyranoside (**25**)

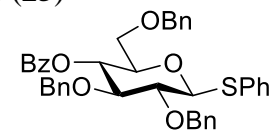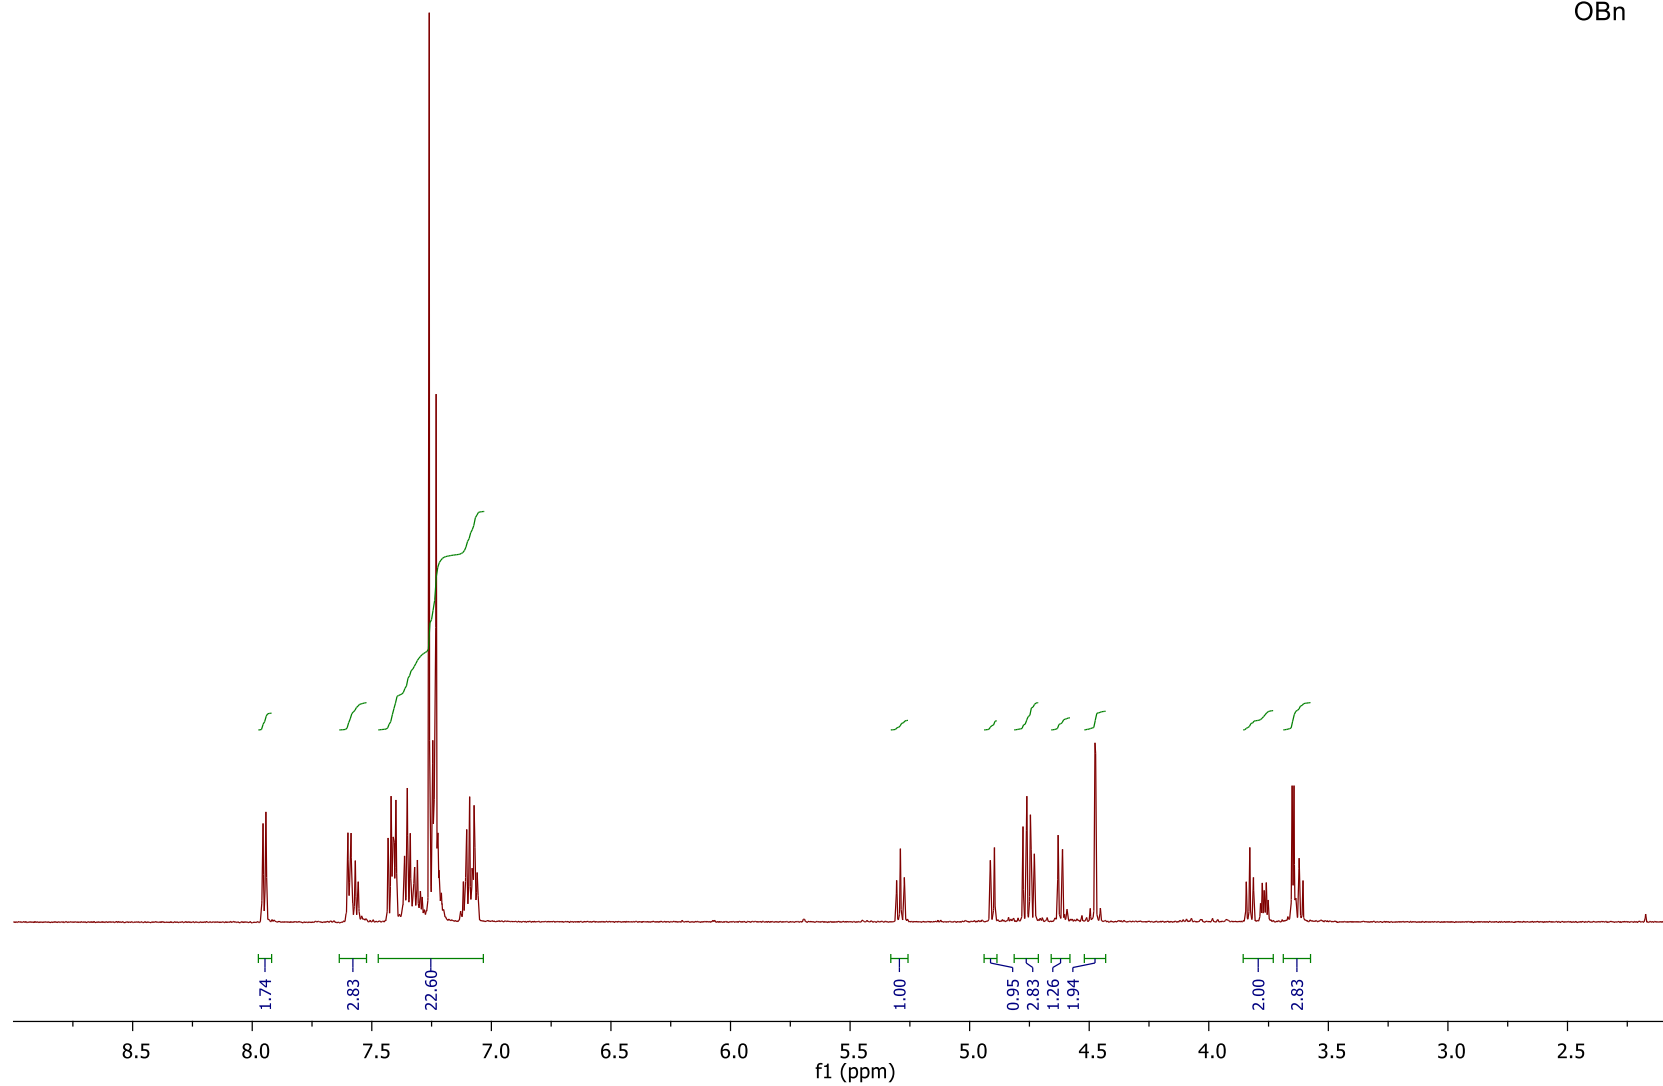

<sup>1</sup>H NMR (600 MHz, C<sub>6</sub>D<sub>6</sub>) Spectrum of Phenyl 4-*O*-benzoyl-2,3,6-tri-*O*-benzyl-1-thio-β-D-glucopyranoside (**25**)

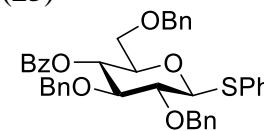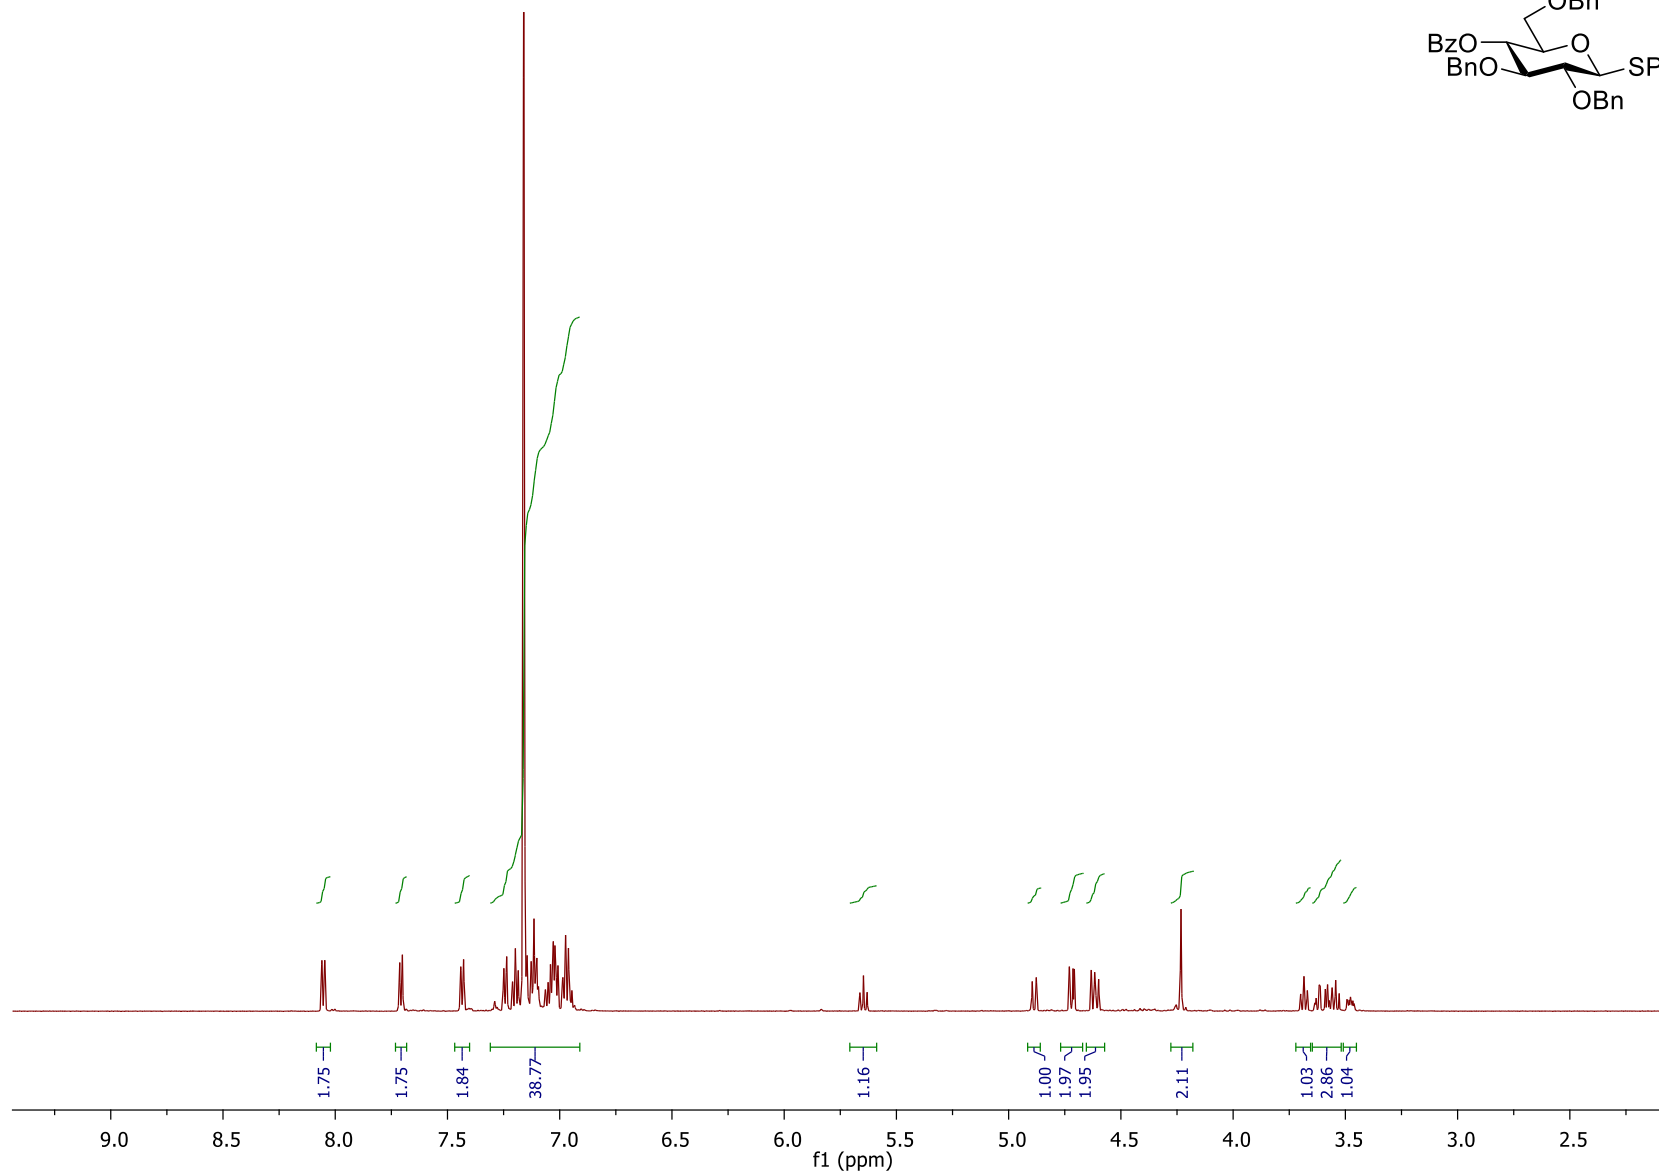

$^1\text{H}$  NMR (600 MHz,  $\text{CDCl}_3$ ) Spectrum of Phenyl 4-*O*-benzoyl-(6*S*)-[6- $^2\text{H}_1$ ]-2,3,6-tri-*O*-benzyl-1-thio- $\beta$ -D-glucopyranoside (**6S-D-25**)

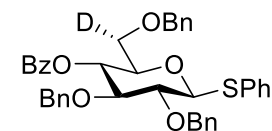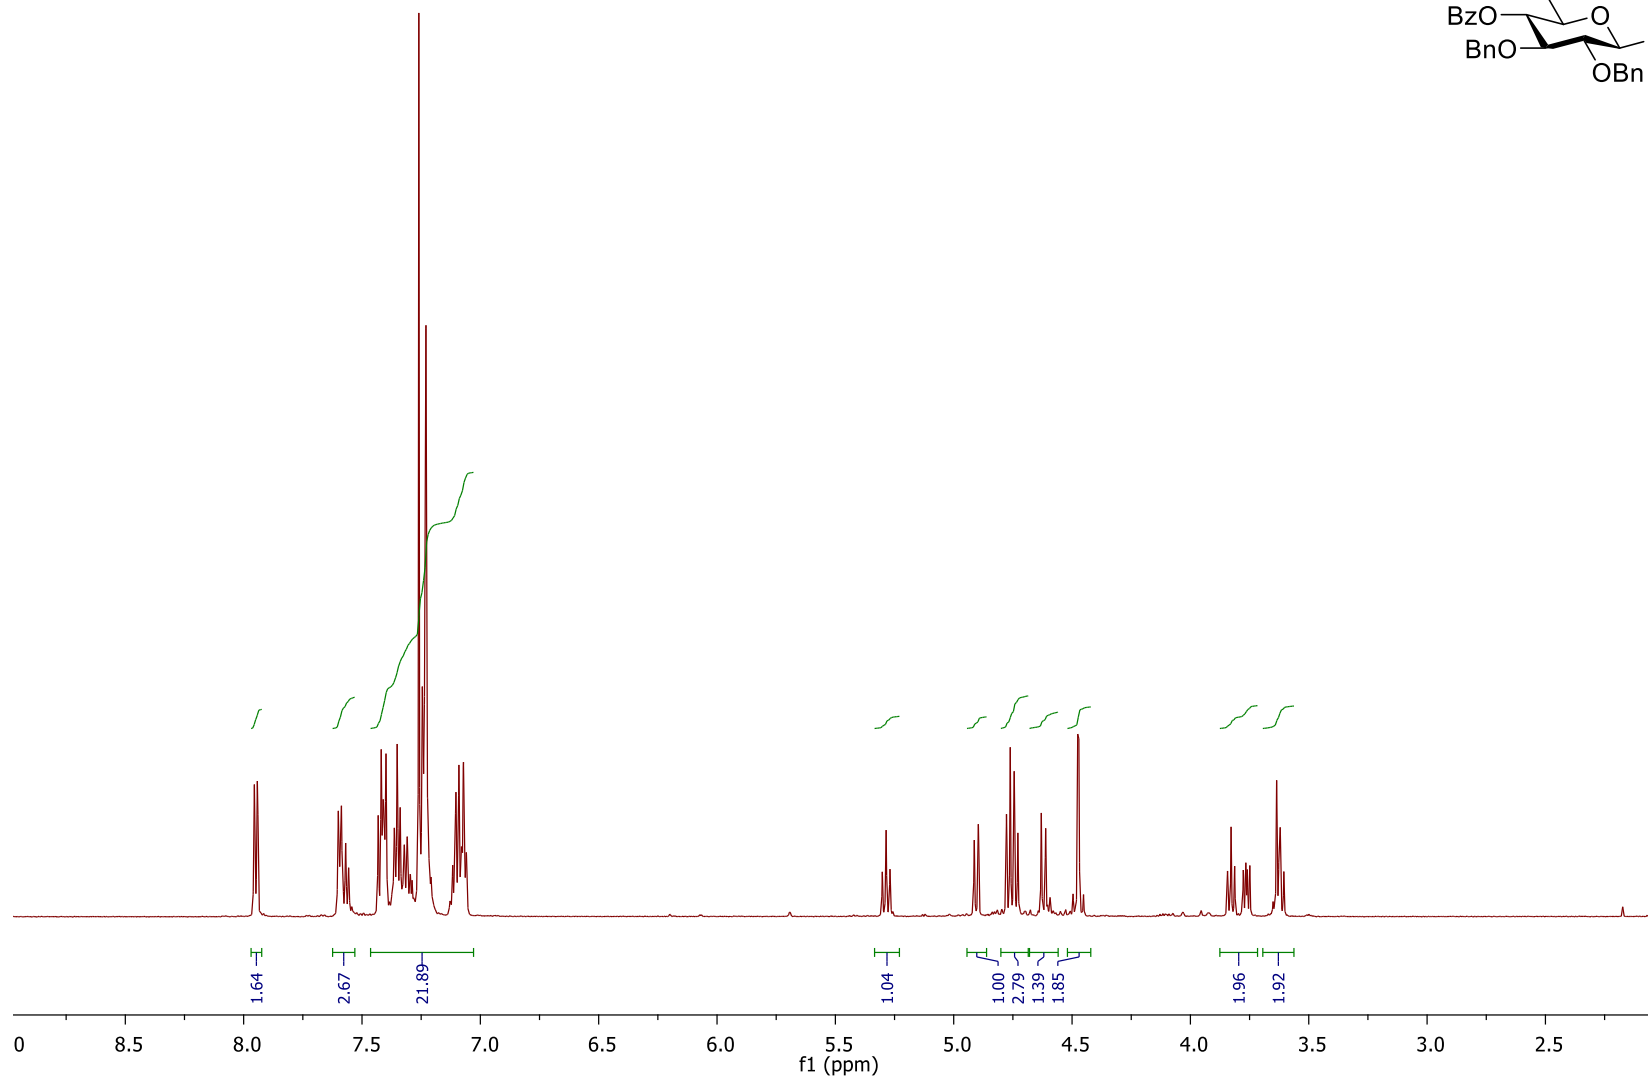

$^1\text{H}$  NMR (600 MHz,  $\text{C}_6\text{D}_6$ ) Spectrum of Phenyl 4-*O*-benzoyl-(6*S*)-[6- $^2\text{H}_1$ ]-2,3,6-tri-*O*-benzyl-1-thio- $\beta$ -D-(6*S*- $^2\text{H}$ )-glucopyranoside (**6*S*-D-25**)

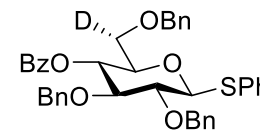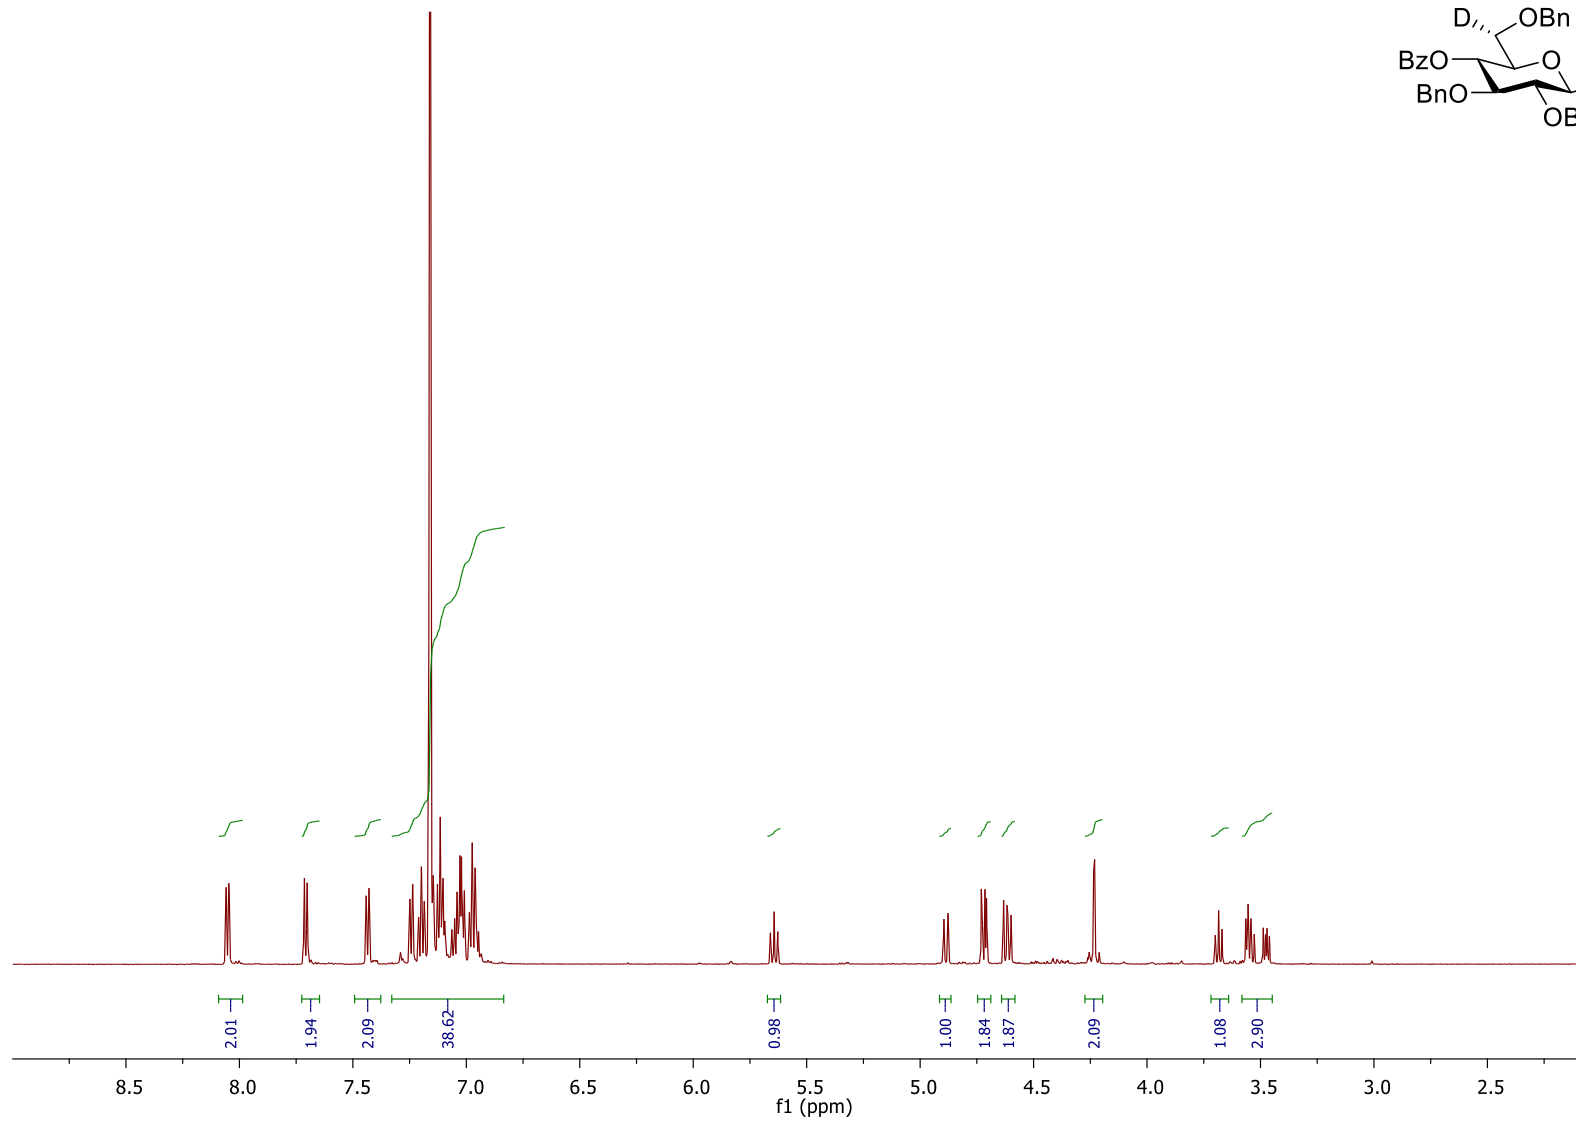

$^1\text{H}$  NMR (600 MHz,  $\text{CDCl}_3$ ) Spectrum of Phenyl 4-*O*-benzenesulfonyl-2,3,6-tri-*O*-benzyl-1-thio- $\beta$ -D-glucopyranoside (**26**)

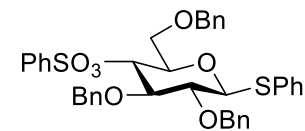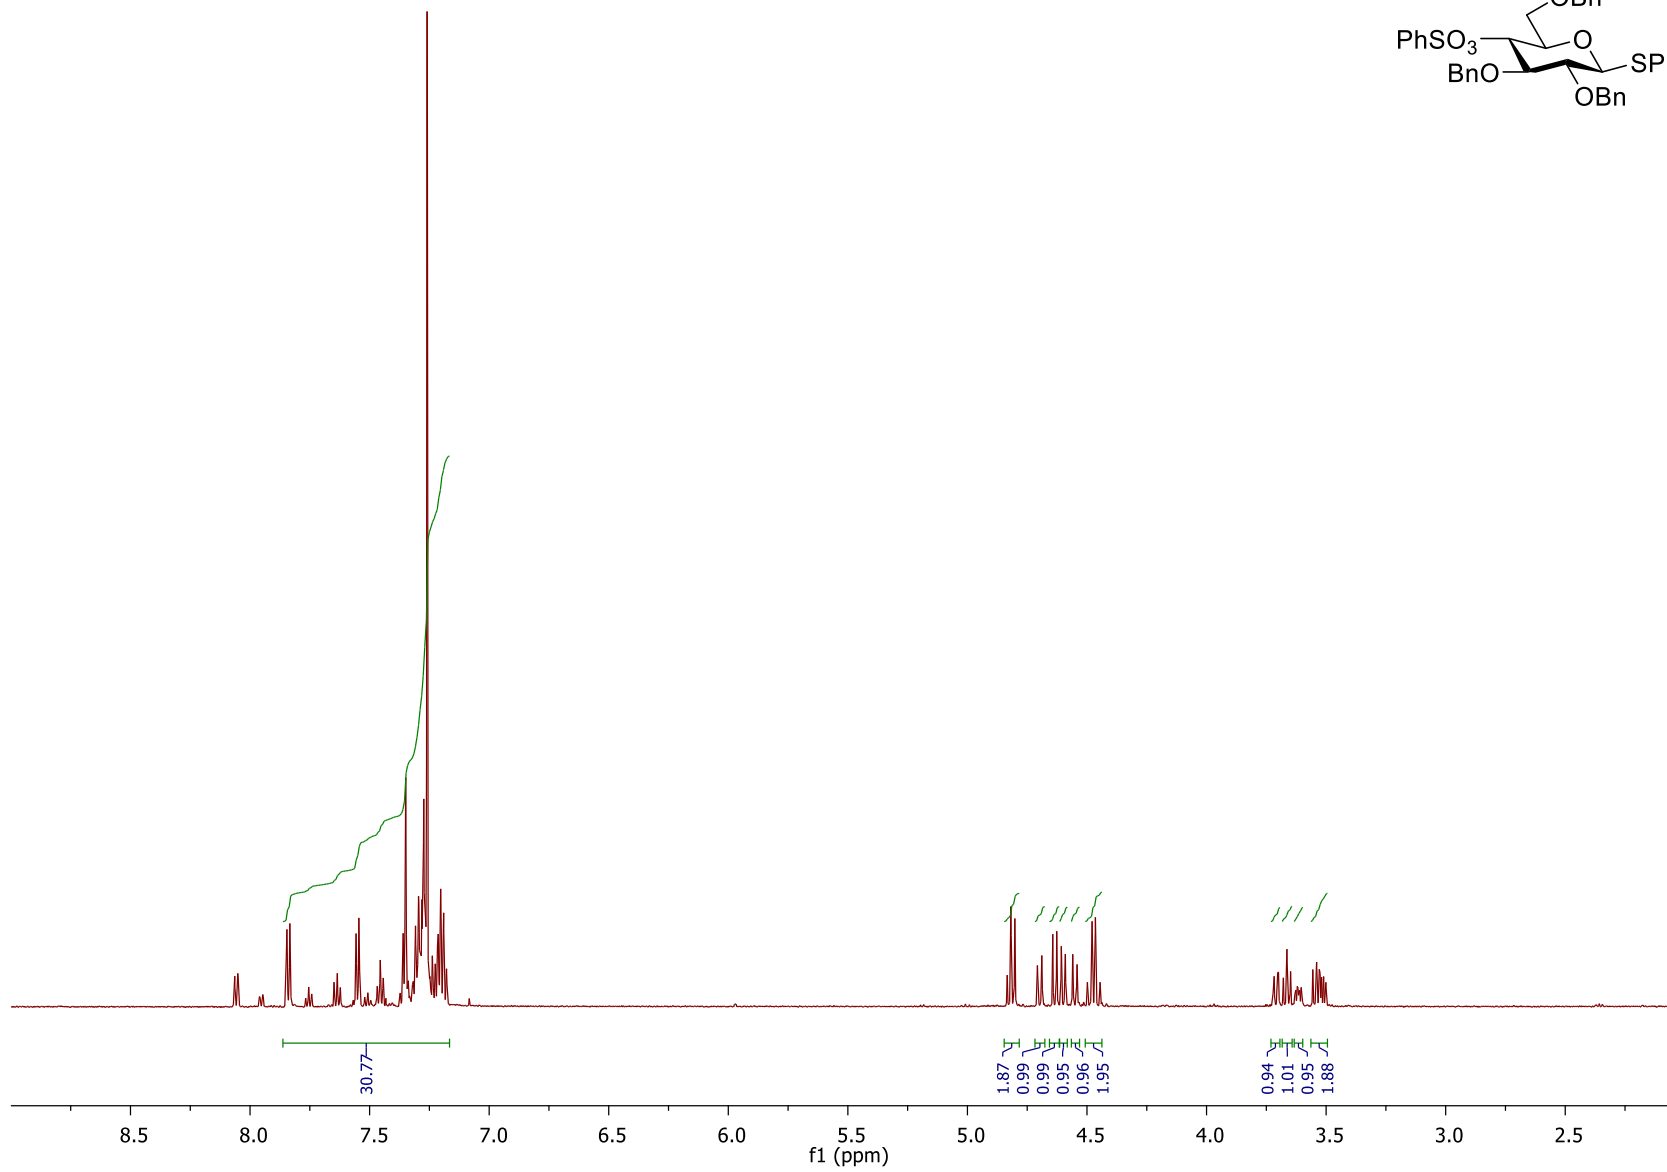

$^{13}\text{C}$  NMR (150 MHz,  $\text{CDCl}_3$ ) Spectrum of Phenyl 4-*O*-benzenesulfonyl-2,3,6-tri-*O*-benzyl-1-thio- $\beta$ -D-glucopyranoside (**26**)

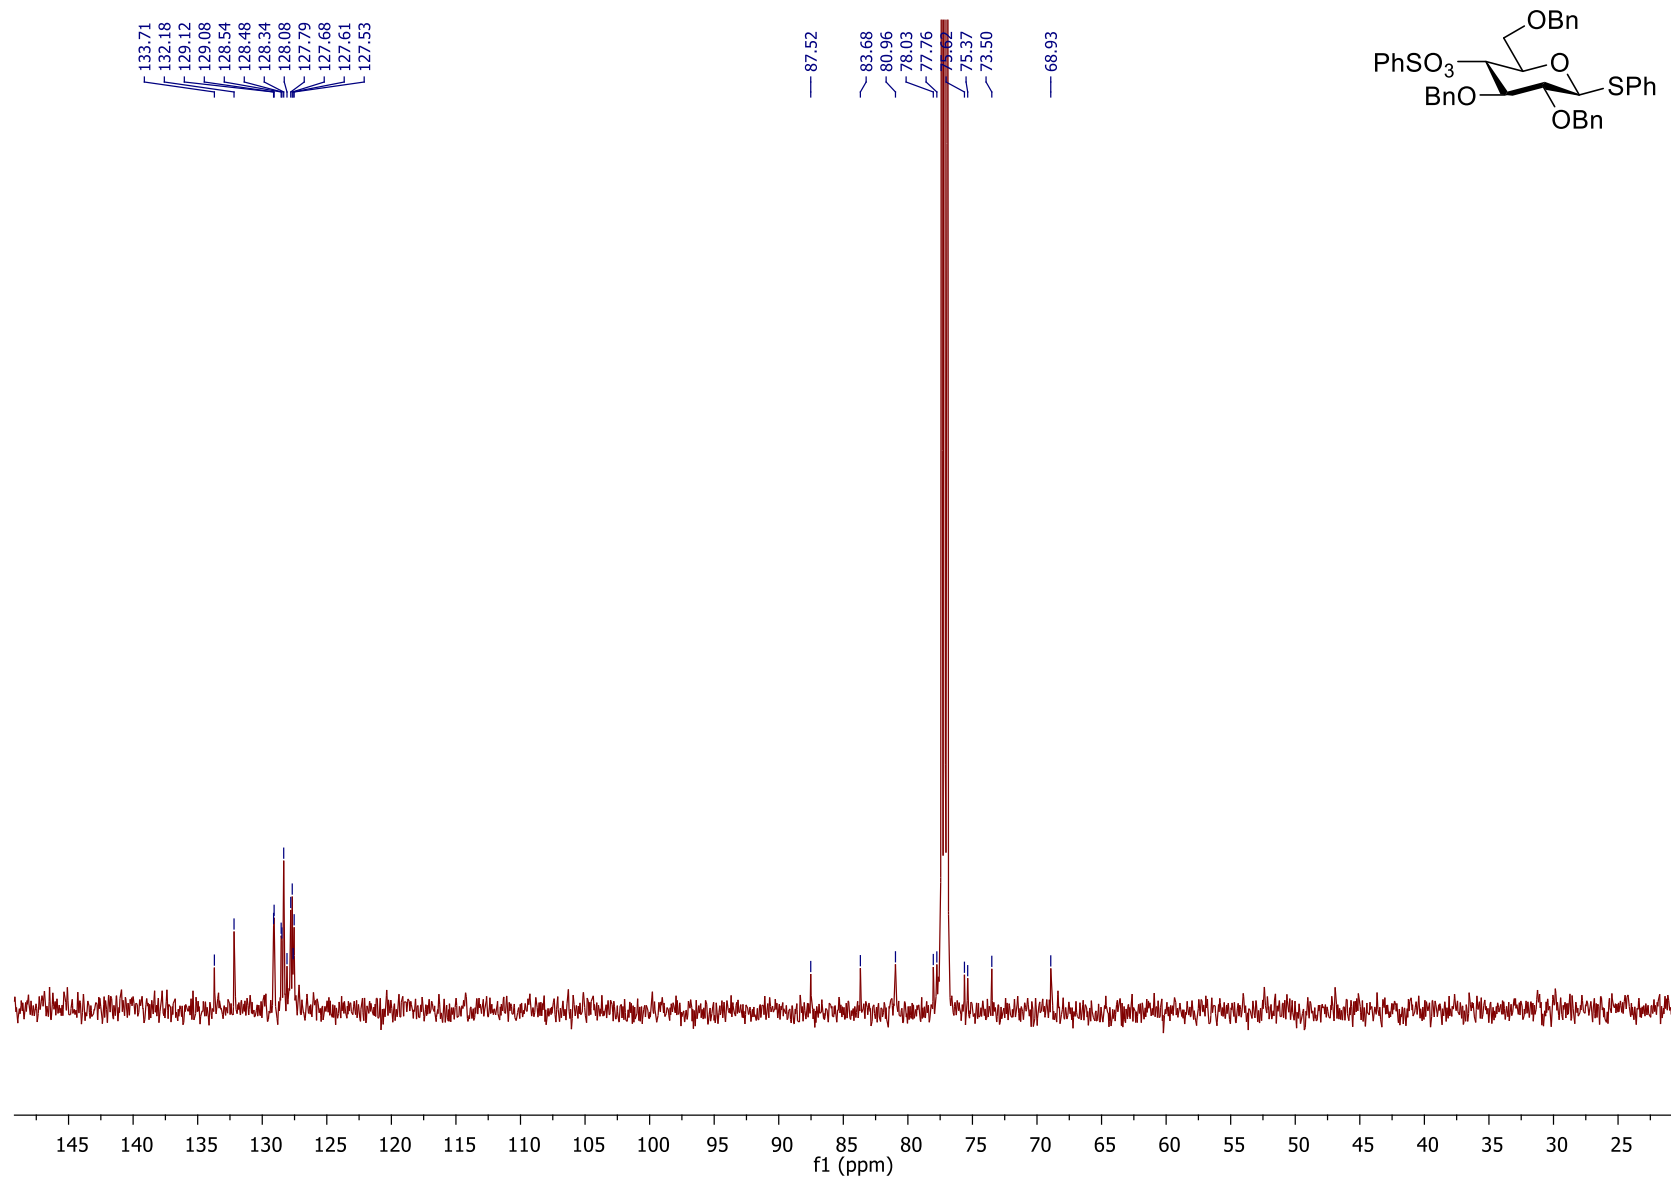

$^1\text{H}$  NMR (600 MHz,  $\text{C}_6\text{D}_6$ ) Spectrum of Phenyl 4-*O*-benzenesulfonyl-2,3,6-tri-*O*-benzyl-1-thio- $\beta$ -D-glucopyranoside (**26**)

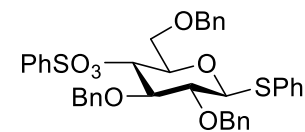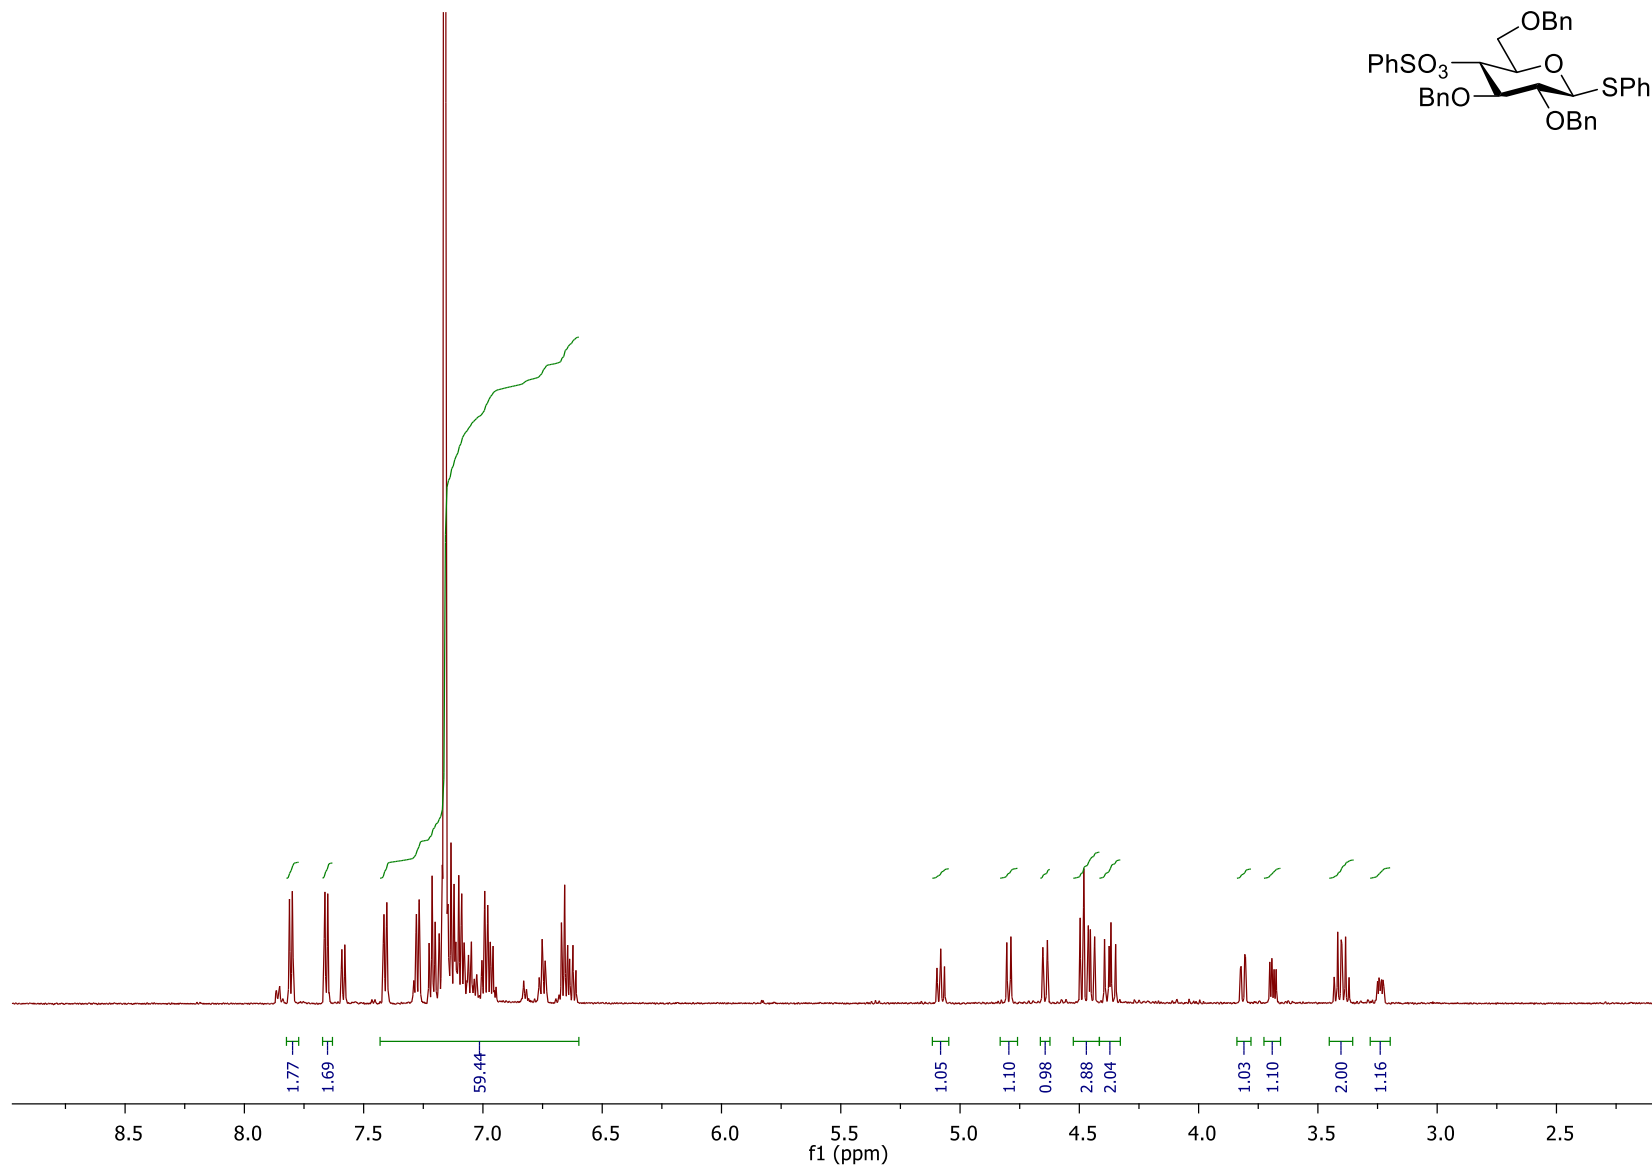

$^1\text{H}$  NMR (600 MHz,  $\text{CDCl}_3$ ) Spectrum of Phenyl 4-*O*-benzenesulfonyl-(6*S*)-[6- $^2\text{H}_1$ ]-2,3,6-tri-*O*-benzyl-1-thio- $\beta$ -D-glucopyranoside  
(**6S-D-26**)

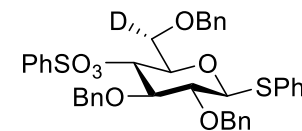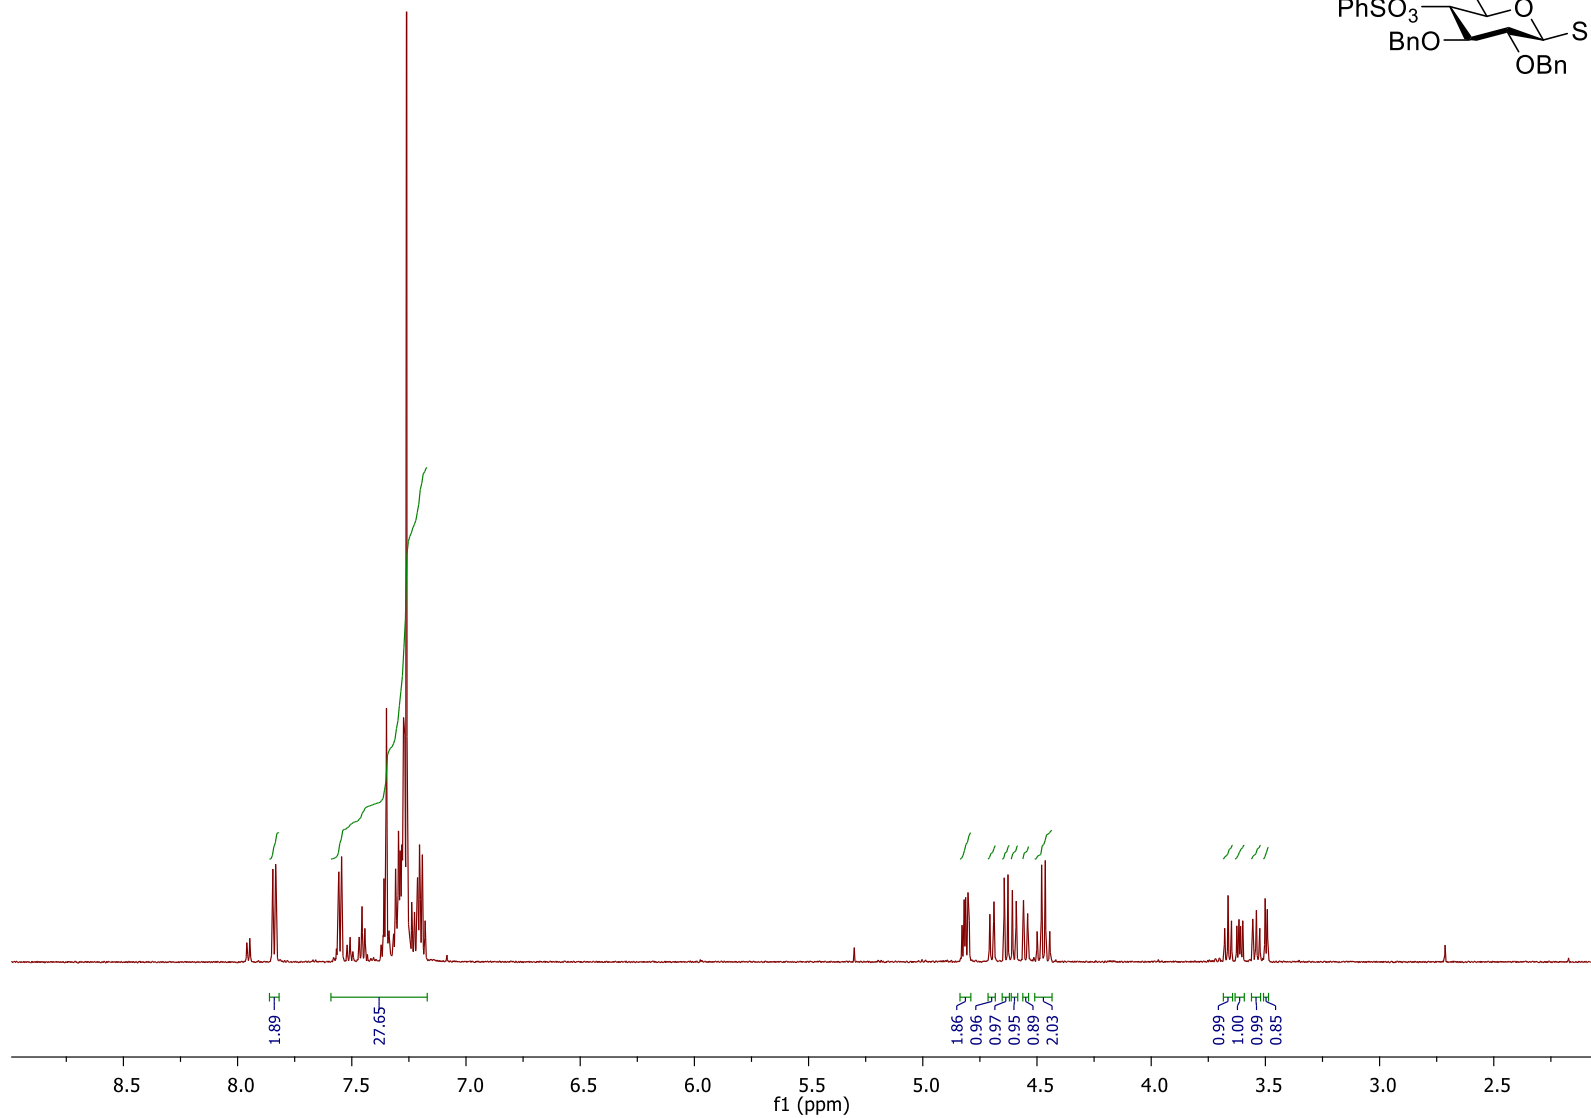



$^1\text{H}$  NMR (600 MHz,  $\text{C}_6\text{D}_6$ ) Spectrum of Phenyl 4-*O*-benzenesulfonyl-(6*S*)-[6- $^2\text{H}_1$ ]-2,3,6-tri-*O*-benzyl-1-thio- $\beta$ -D-glucopyranoside (**6S-D-26**)

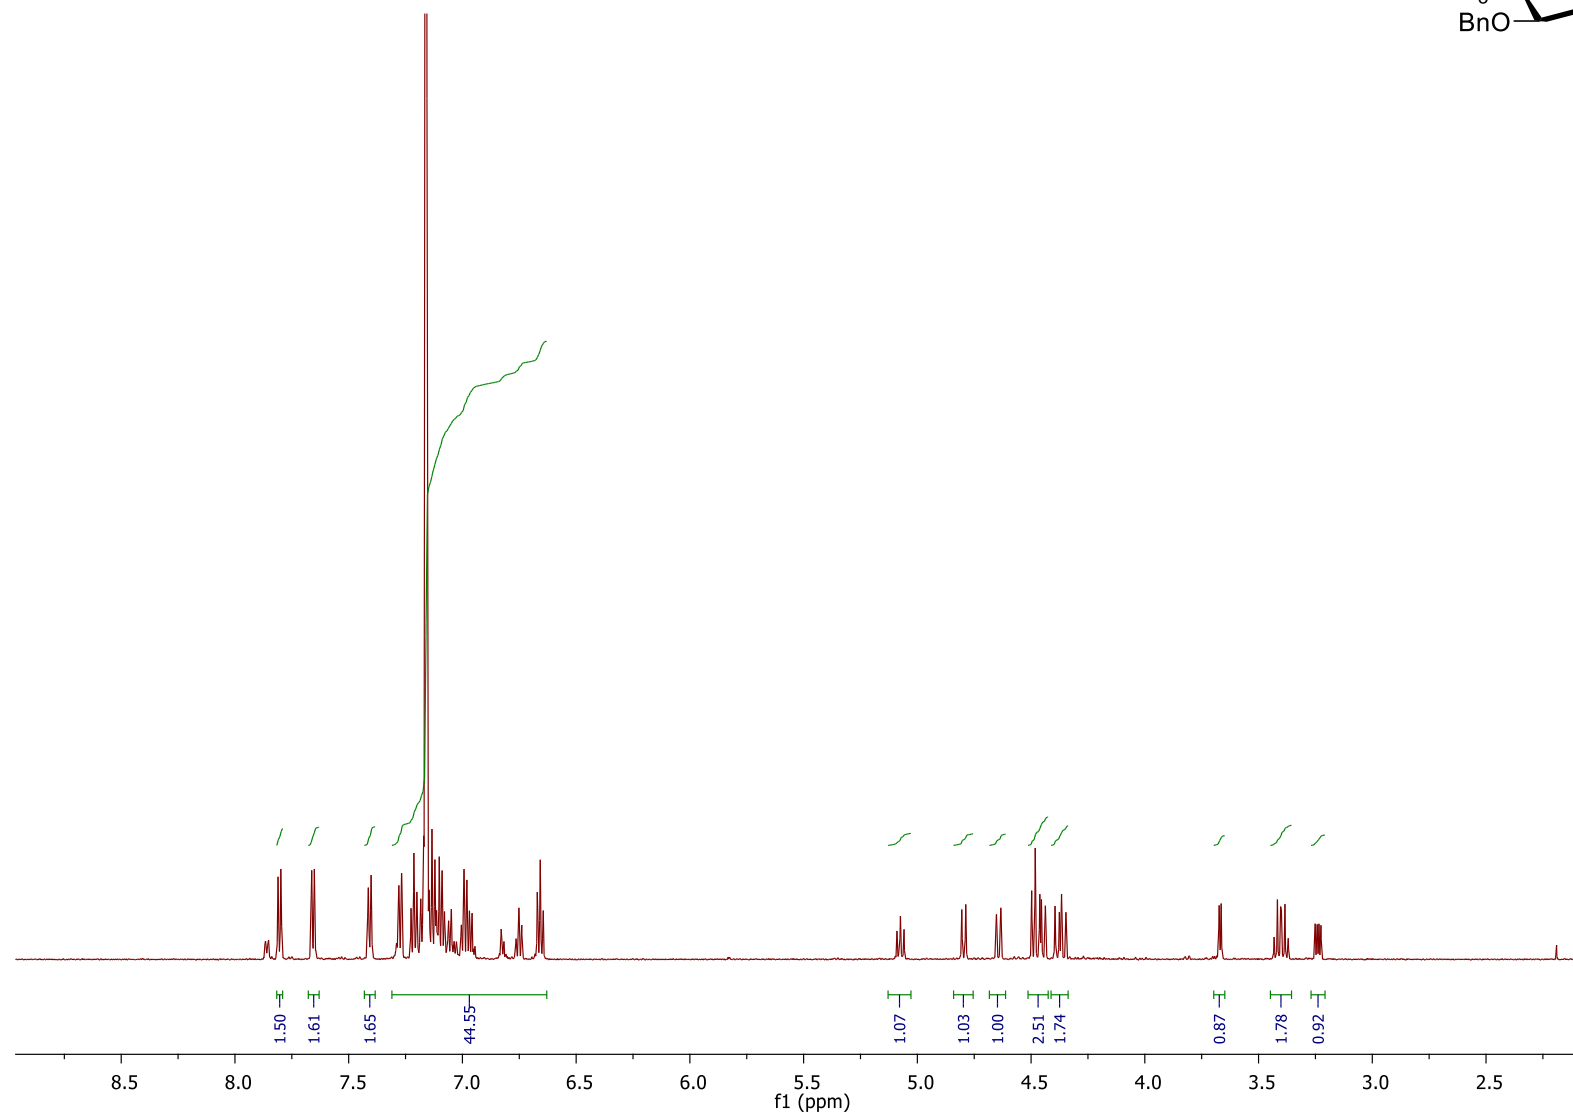

$^1\text{H}$  NMR (600 MHz,  $\text{CDCl}_3$ ) Spectrum of Phenyl 2,3,4,6-tetra-*O*-benzyl-1-thio- $\beta$ -D-glucopyranoside (**27**)

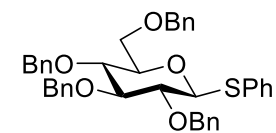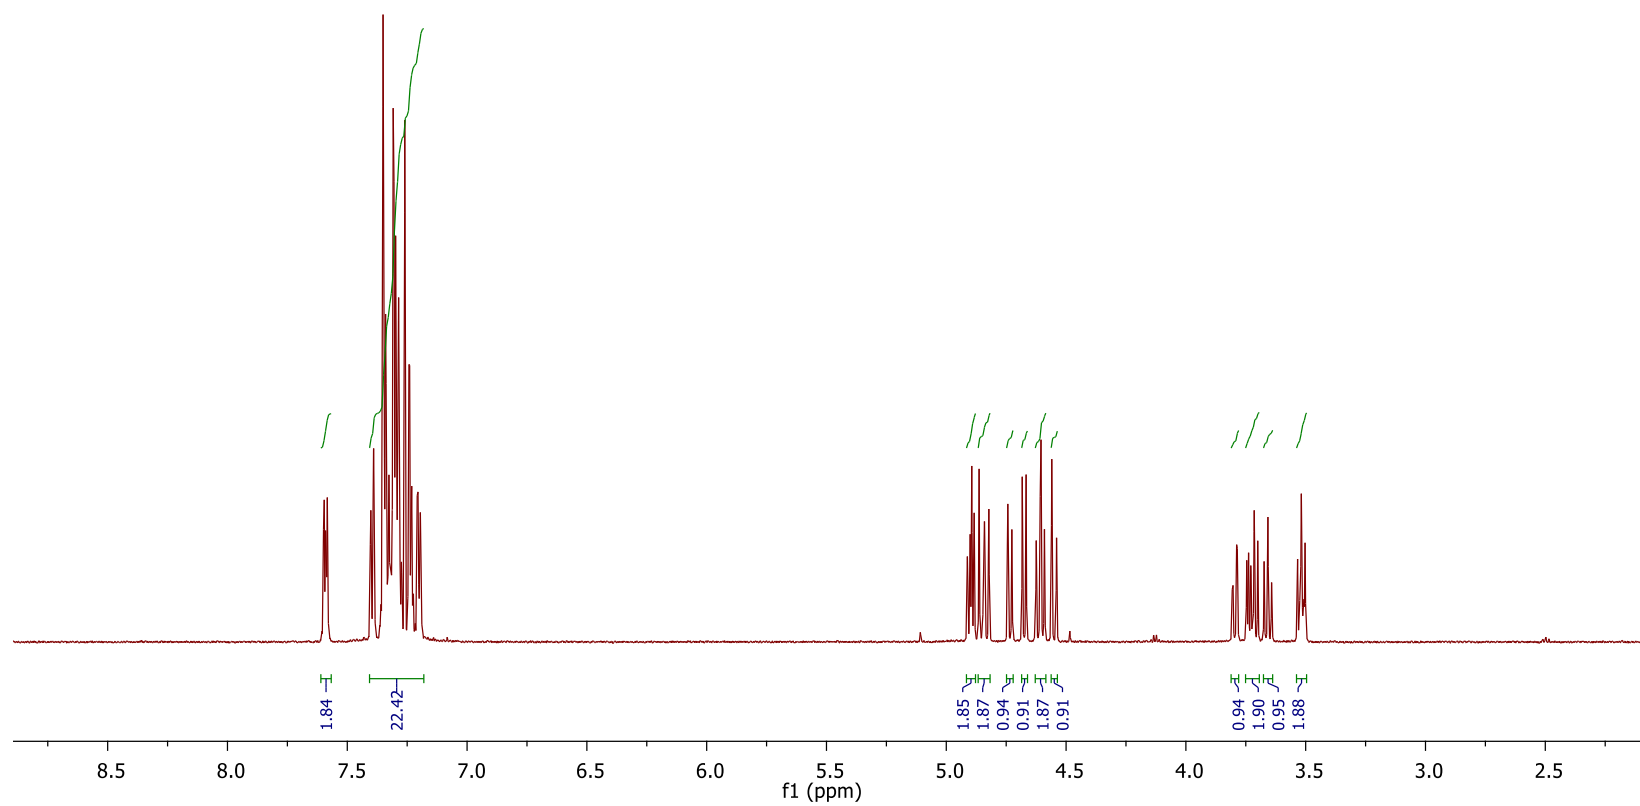

$^1\text{H}$  NMR (600 MHz,  $\text{C}_6\text{D}_6$ ) Spectrum of Phenyl 2,3,4,6-tetra-*O*-benzyl-1-thio- $\beta$ -D-glucopyranoside (**27**)

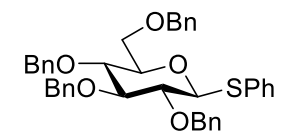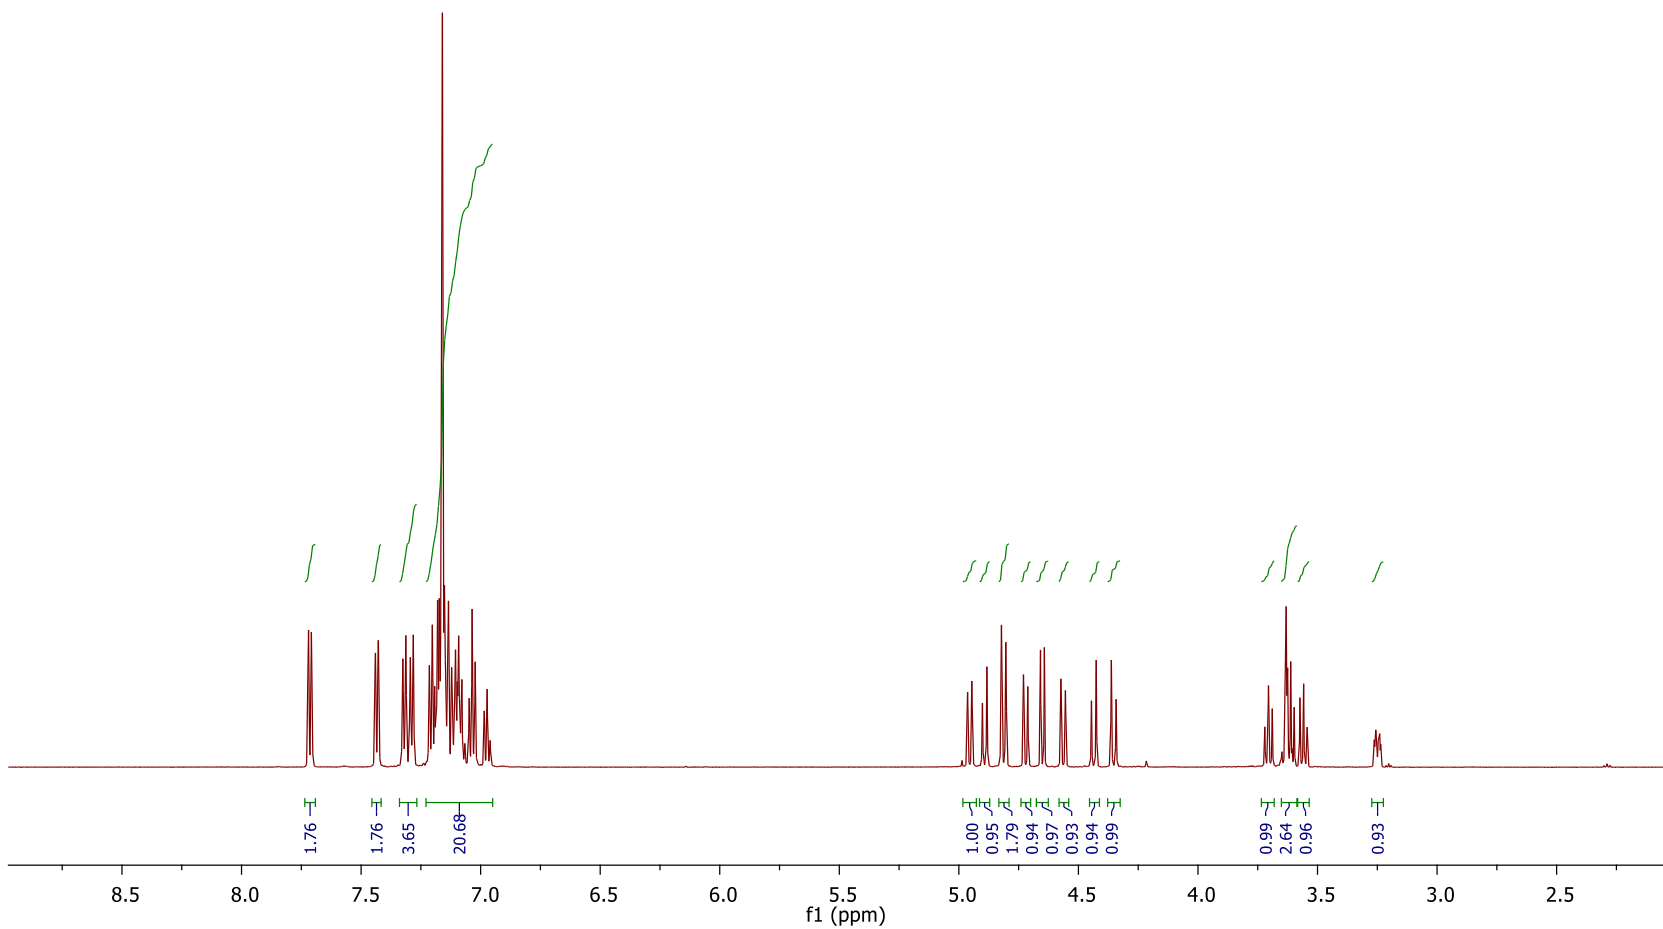

$^1\text{H}$  NMR (600 MHz,  $\text{CDCl}_3$ ) Spectrum of Phenyl (6*S*)-[6- $^2\text{H}_1$ ]-2,3,4,6-tetra-*O*-benzyl-1-thio- $\beta$ -D-glucopyranoside (**6*S*-D-27**)

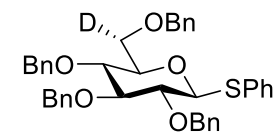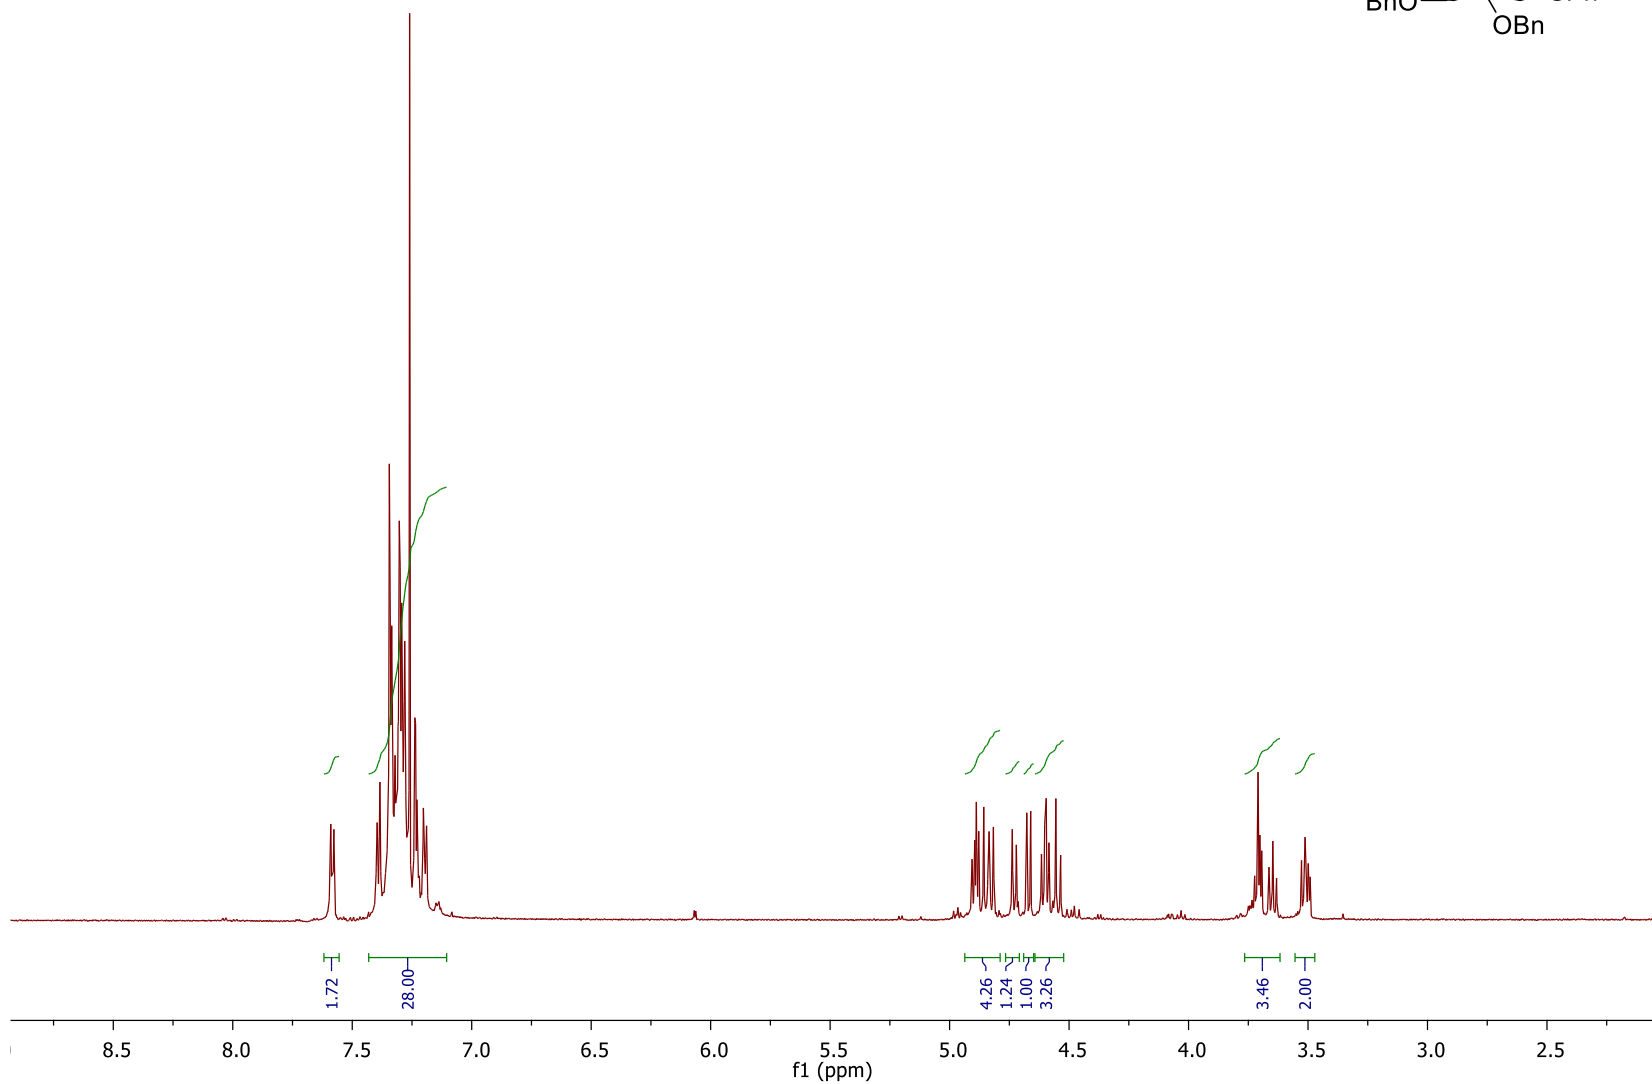

$^1\text{H}$  NMR (600 MHz,  $\text{C}_6\text{D}_6$ ) Spectrum of Phenyl (6*S*)-[6- $^2\text{H}_1$ ]-2,3,4,6-tetra-*O*-benzyl-1-thio- $\beta$ -D-glucopyranoside (**6S-D-27**)

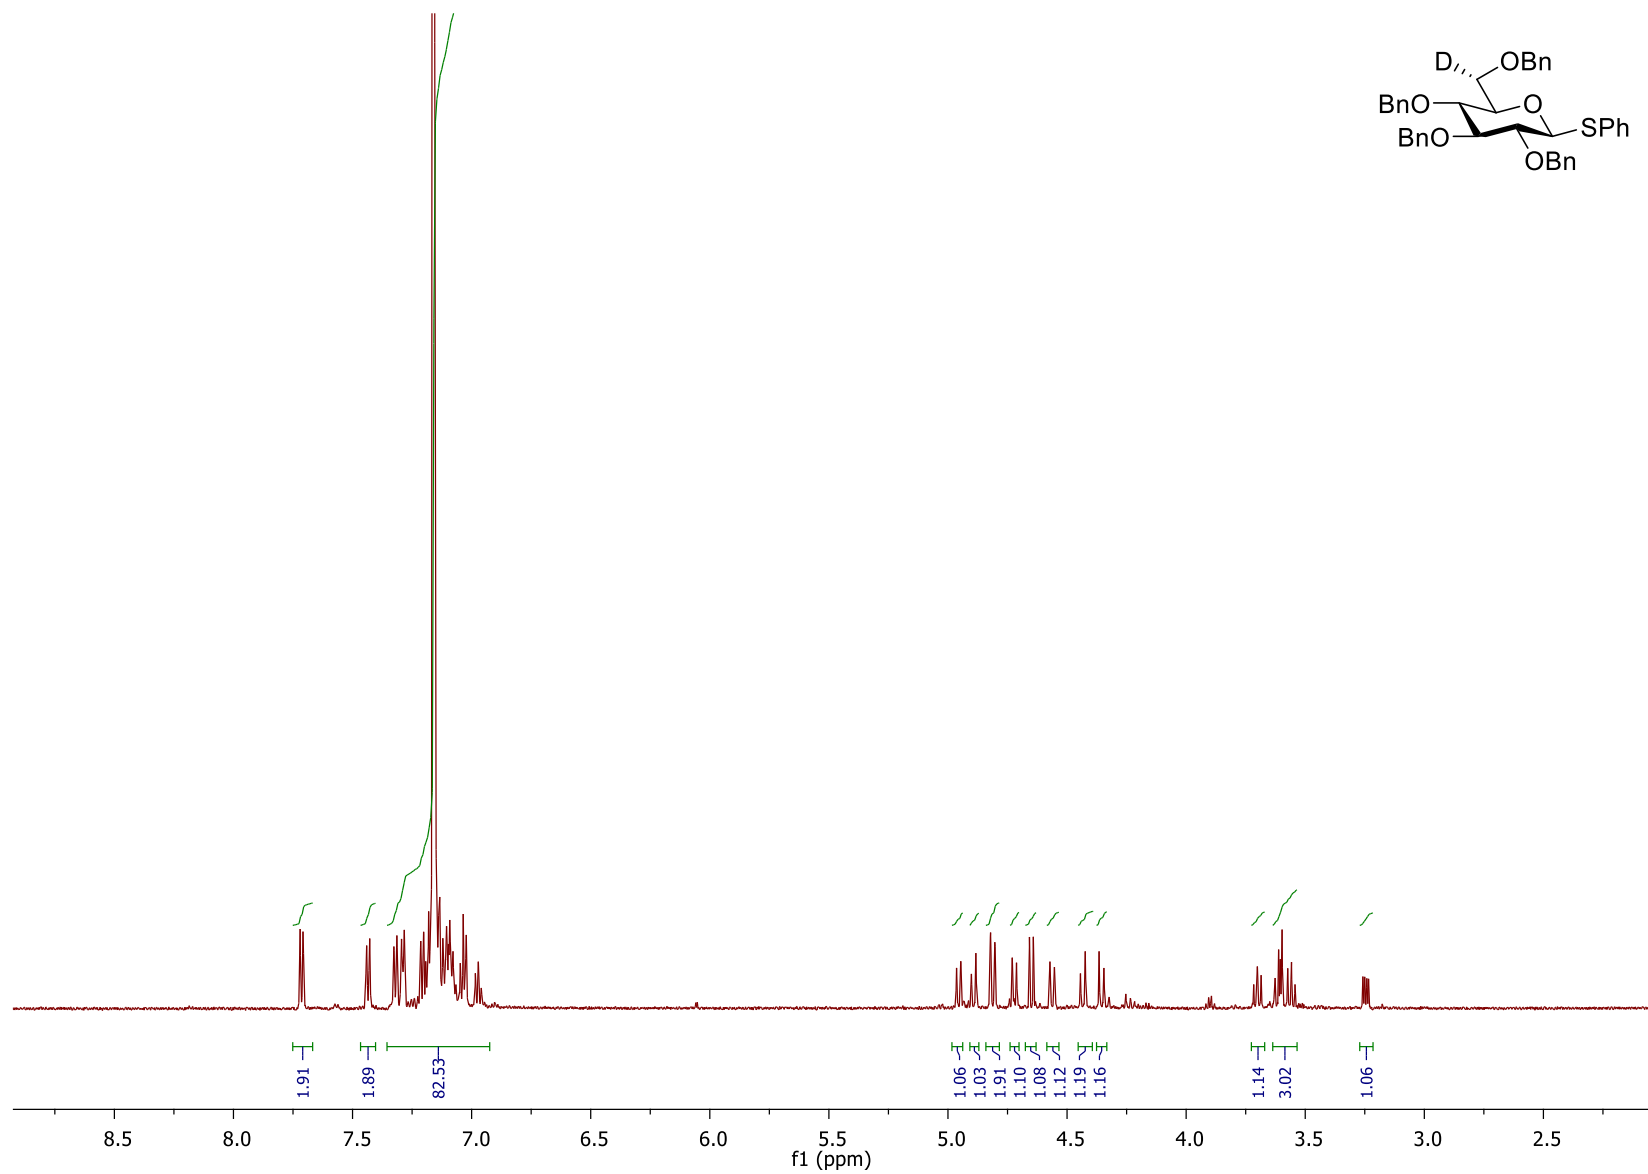

<sup>1</sup>H NMR (600 MHz, CDCl<sub>3</sub>) Spectrum of Ethyl 6-*O*-acetyl-2,3,4-tri-*O*-benzyl-1-thio-β-D-glucopyranoside (**28**)

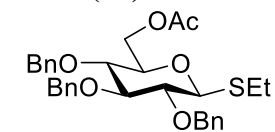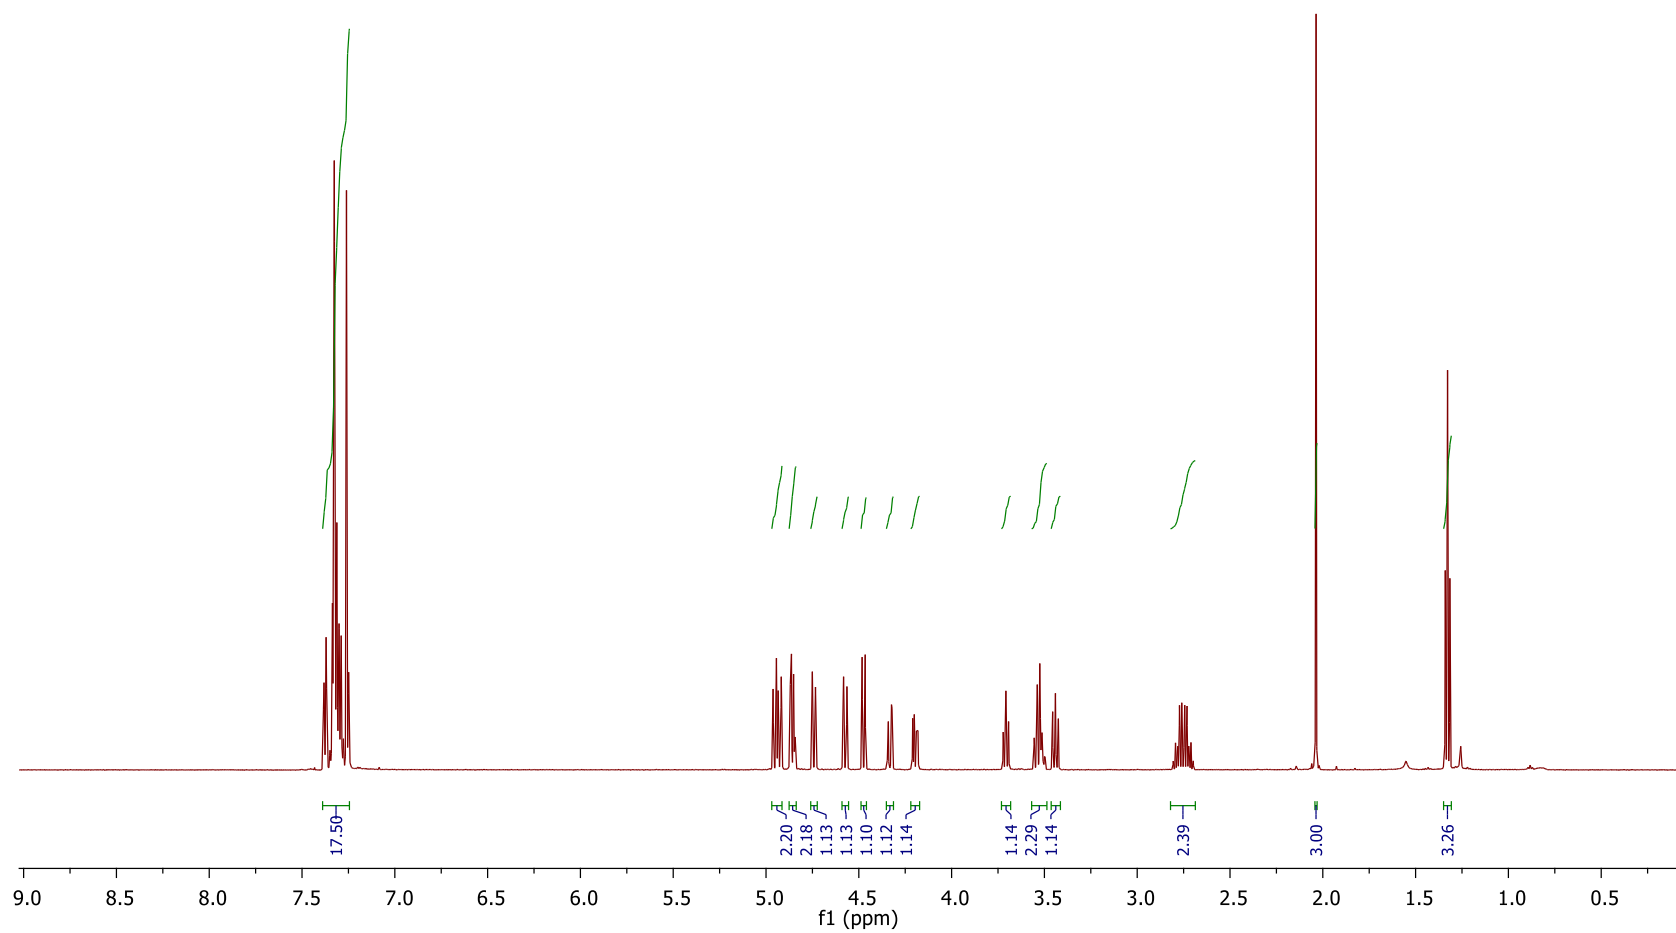

Simulated  $^1\text{H}$  NMR and  $^1\text{H}$  NMR (600 MHz,  $\text{CDCl}_3$ ) Spectrum of Ethyl 6-*O*-acetyl-2,3,4-tri-*O*-benzyl-1-thio- $\beta$ -D-glucopyranoside (28)

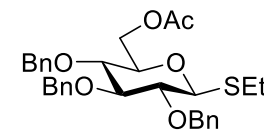

Experimental  $^1\text{H}$  NMR (600 MHz,  $\text{CDCl}_3$ )

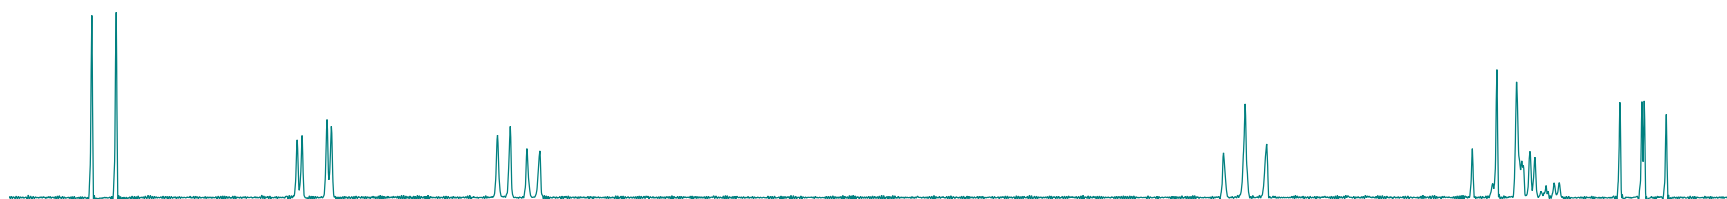

Simulated  $^1\text{H}$  NMR

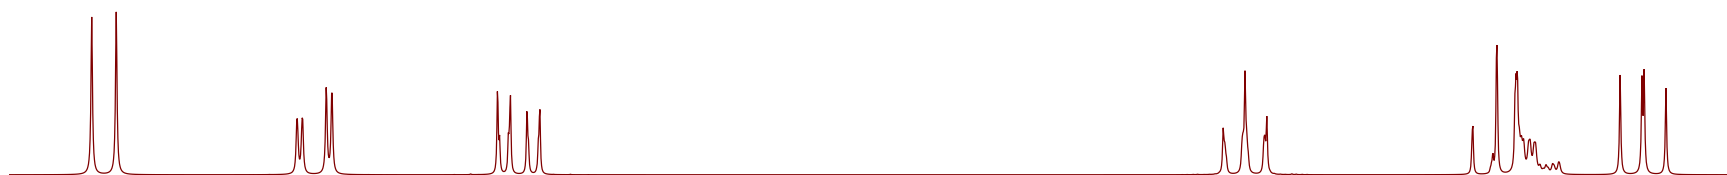

4.50 4.45 4.40 4.35 4.30 4.25 4.20 4.15 4.10 4.05 4.00 3.95 3.90 3.85 3.80 3.75 3.70 3.65 3.60 3.55 3.50 3.45 3.40  
f1 (ppm)  
S95

$^1\text{H}$  NMR (600 MHz,  $\text{C}_6\text{D}_6$ ) Spectrum of Ethyl 6-*O*-acetyl-2,3,4-tri-*O*-benzyl-1-thio- $\beta$ -D-glucopyranoside (**28**)

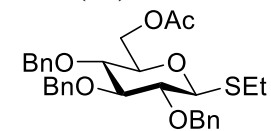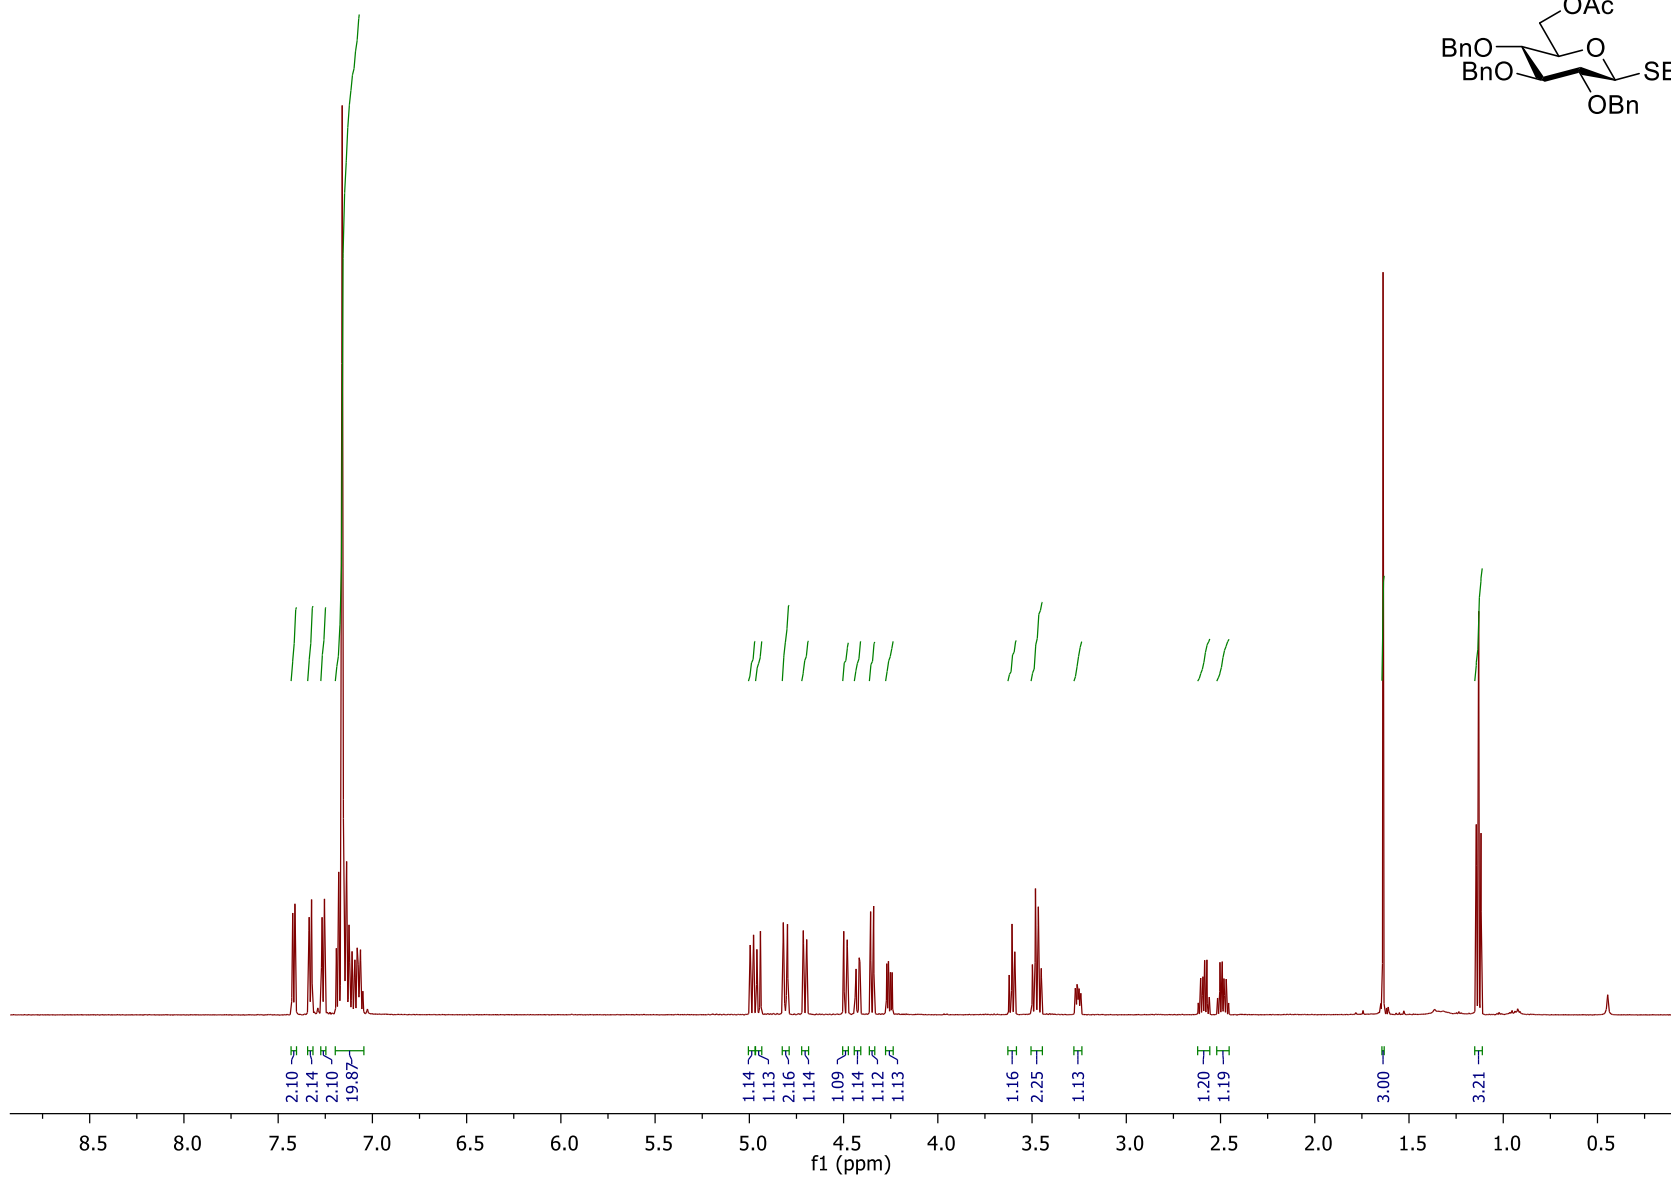



$^1\text{H}$  NMR (600 MHz,  $\text{CDCl}_3$ ) Spectrum of Ethyl 2,3,4-tri-*O*-benzyl-6-*O*-pivaloyl-1-thio- $\beta$ -D-glucopyranoside (**29**)

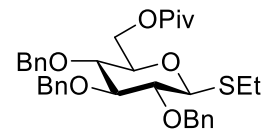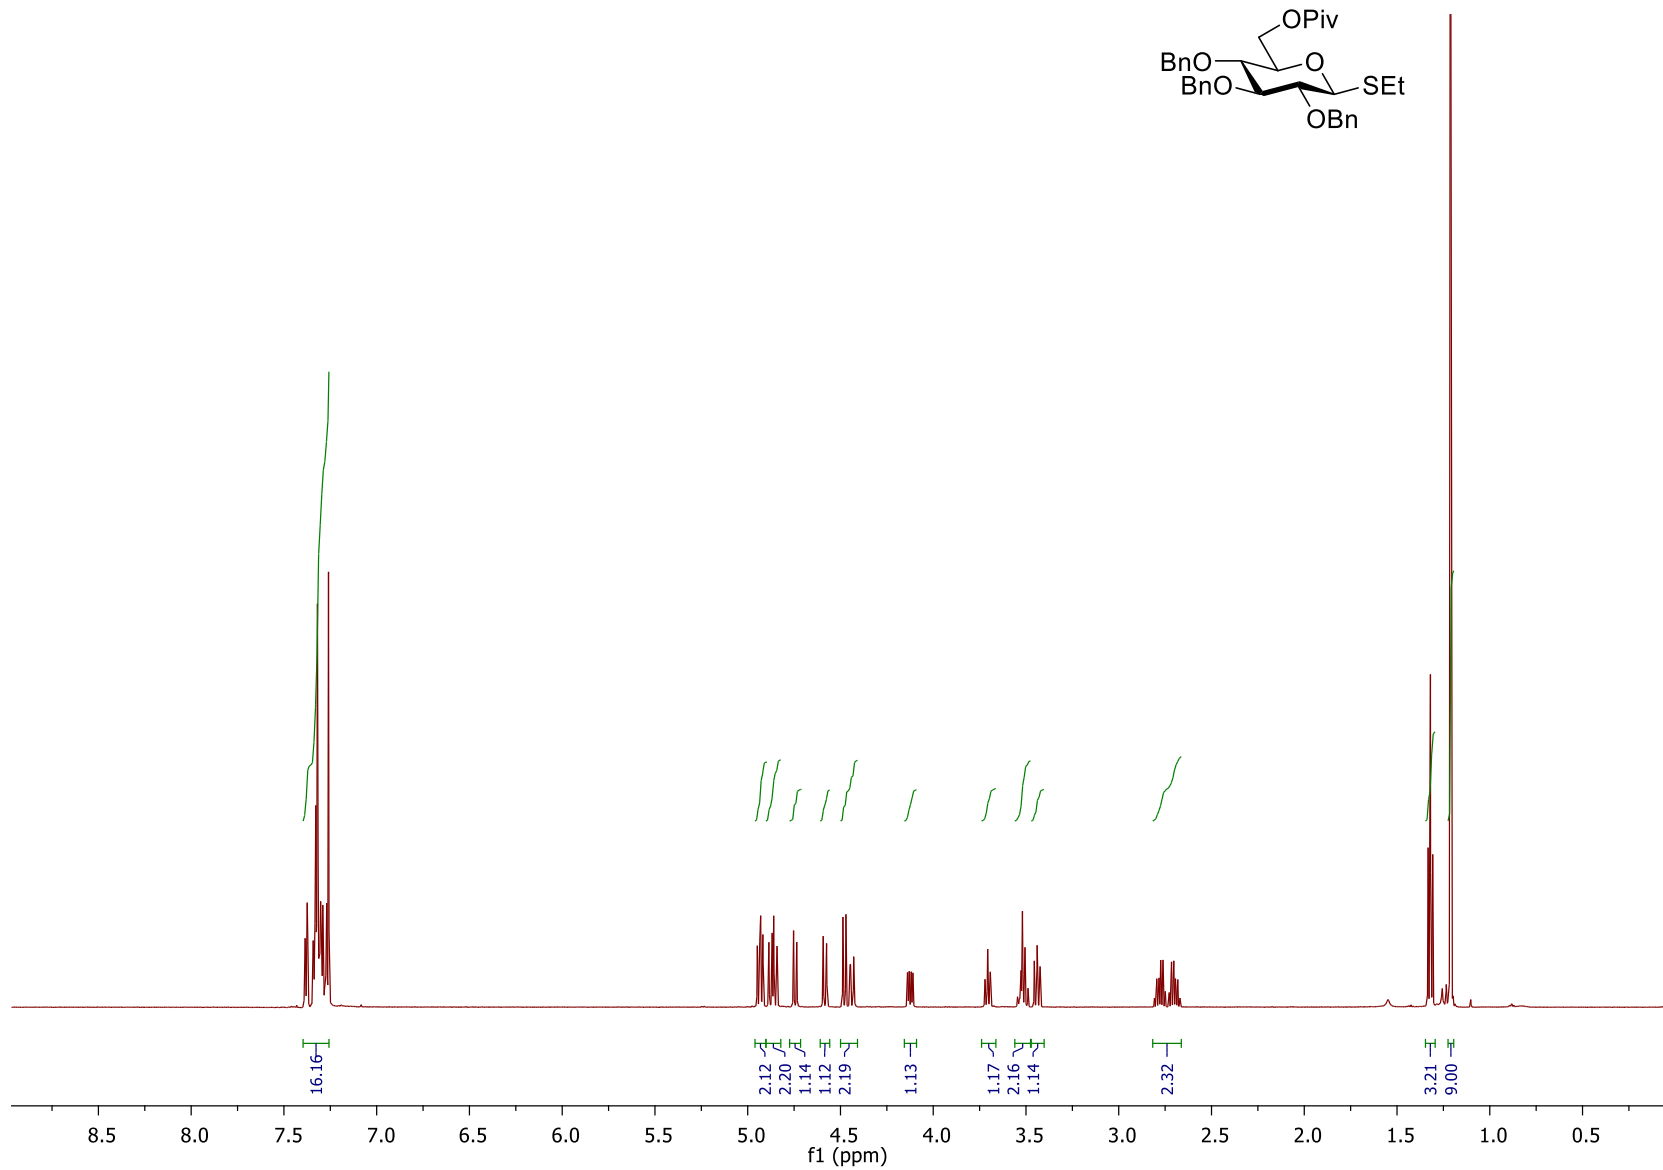

<sup>13</sup>C NMR (150 MHz, CDCl<sub>3</sub>) Spectrum of Ethyl 2,3,4-tri-*O*-benzyl-6-*O*-pivaloyl-1-thio-β-D-glucopyranoside (**29**)

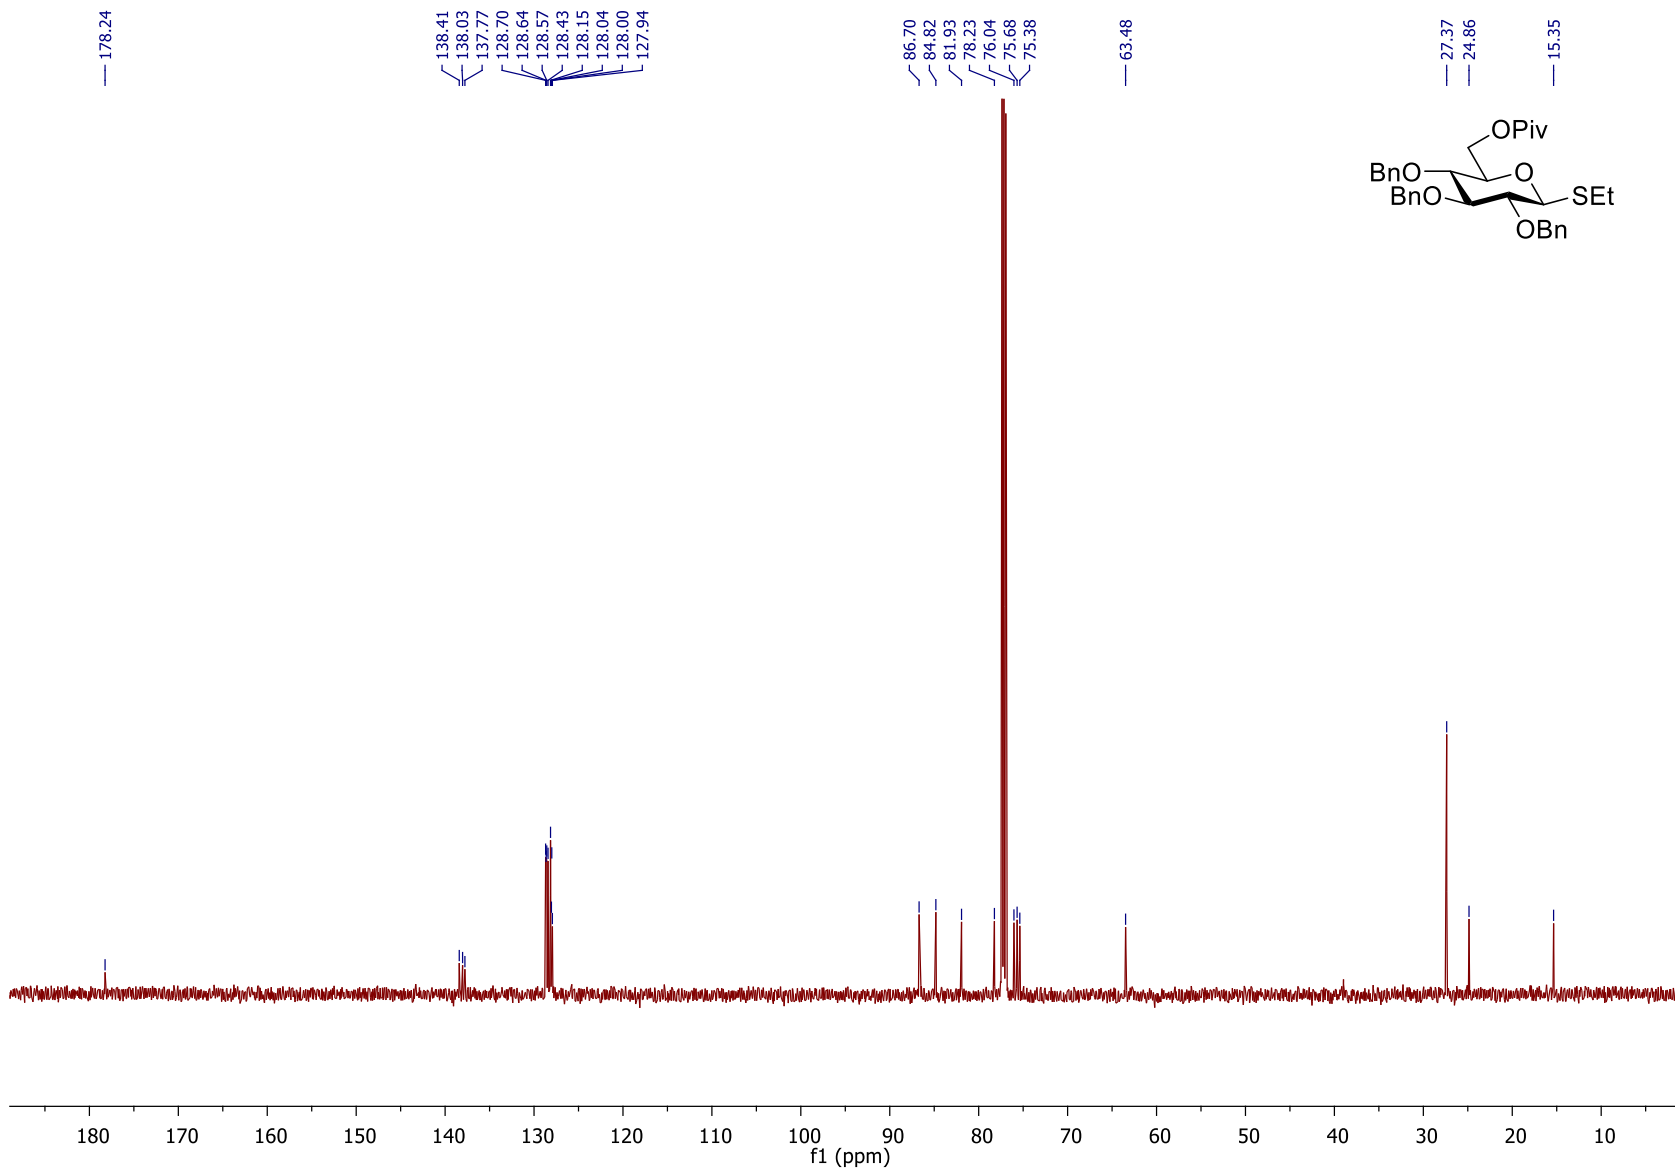

$^1\text{H}$  NMR (600 MHz,  $\text{C}_6\text{D}_6$ ) Spectrum of Ethyl 2,3,4-tri-*O*-benzyl-6-*O*-pivalyl-1-thio- $\beta$ -D-glucopyranoside (**29**)

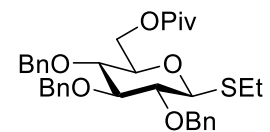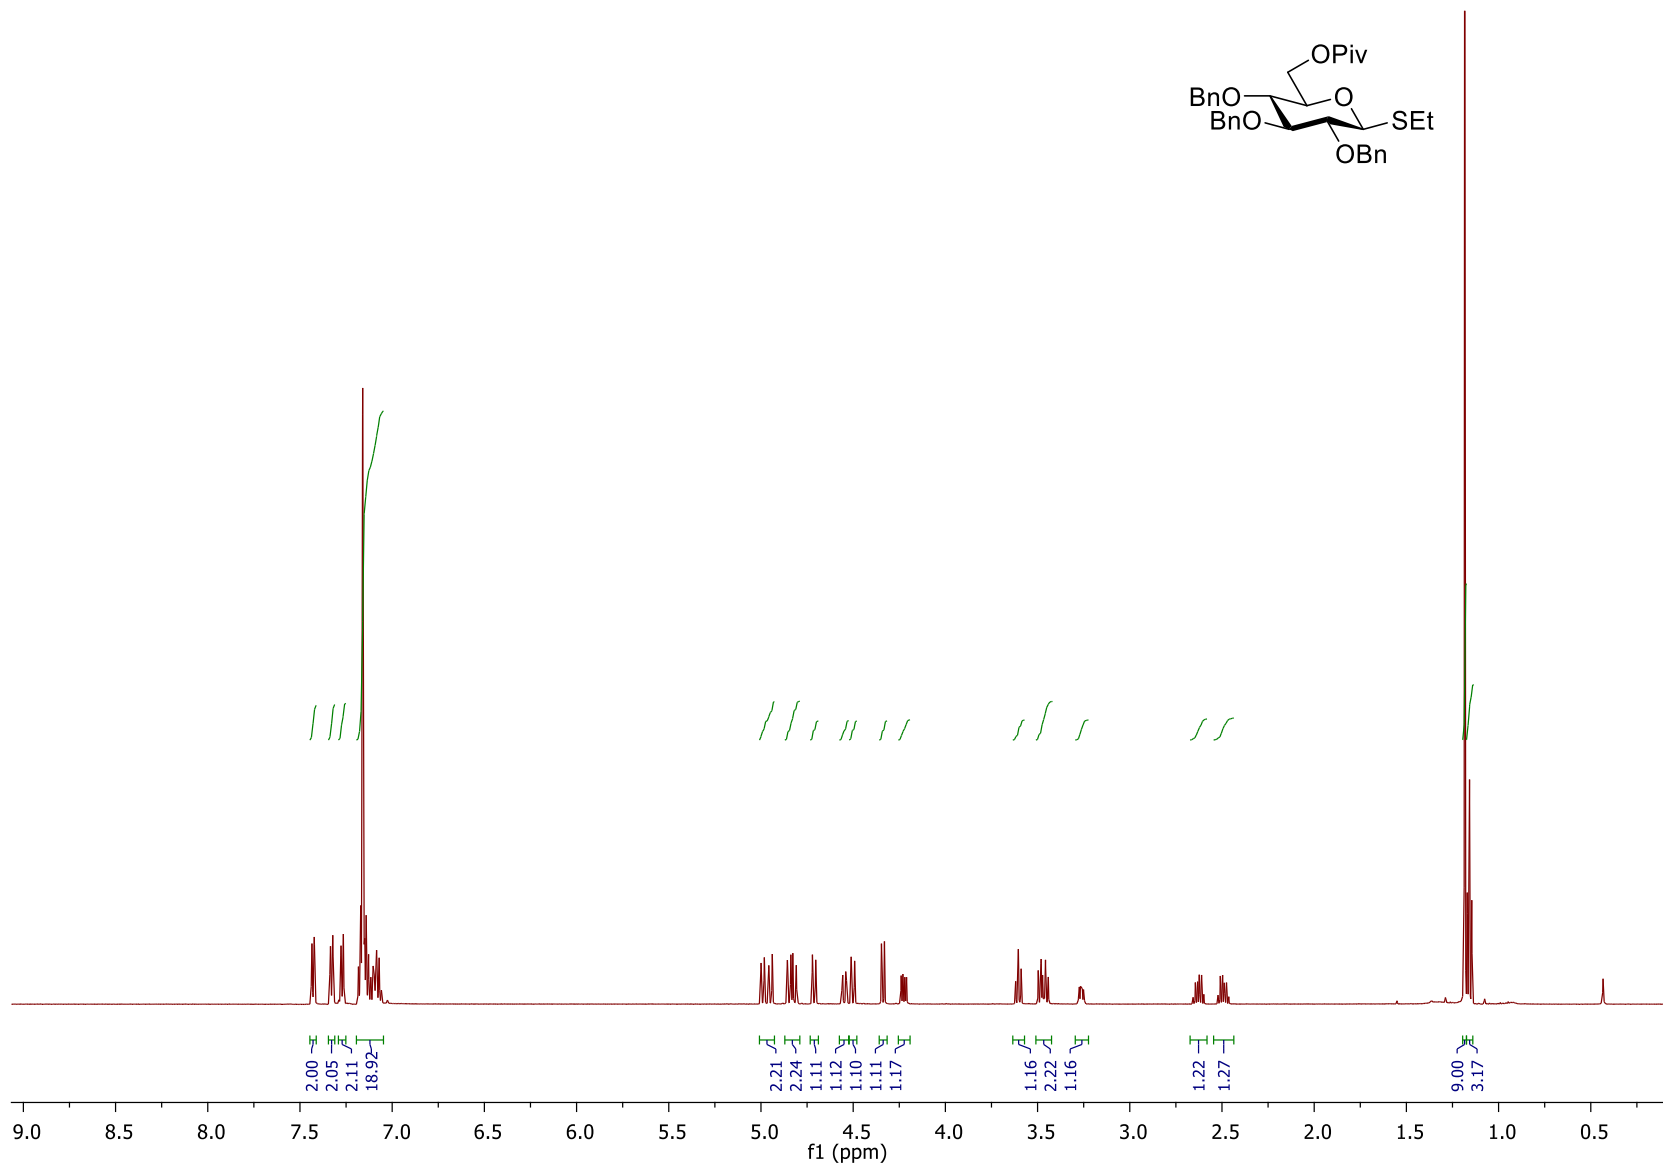

$^1\text{H}$  NMR (600 MHz,  $\text{CDCl}_3$ ) Spectrum of Ethyl 2,3,4-tri-*O*-benzyl-6-*O*-trifluoroacetyl-1-thio- $\beta$ -D-glucopyranoside (**30**)

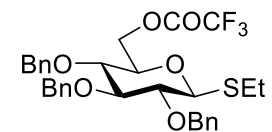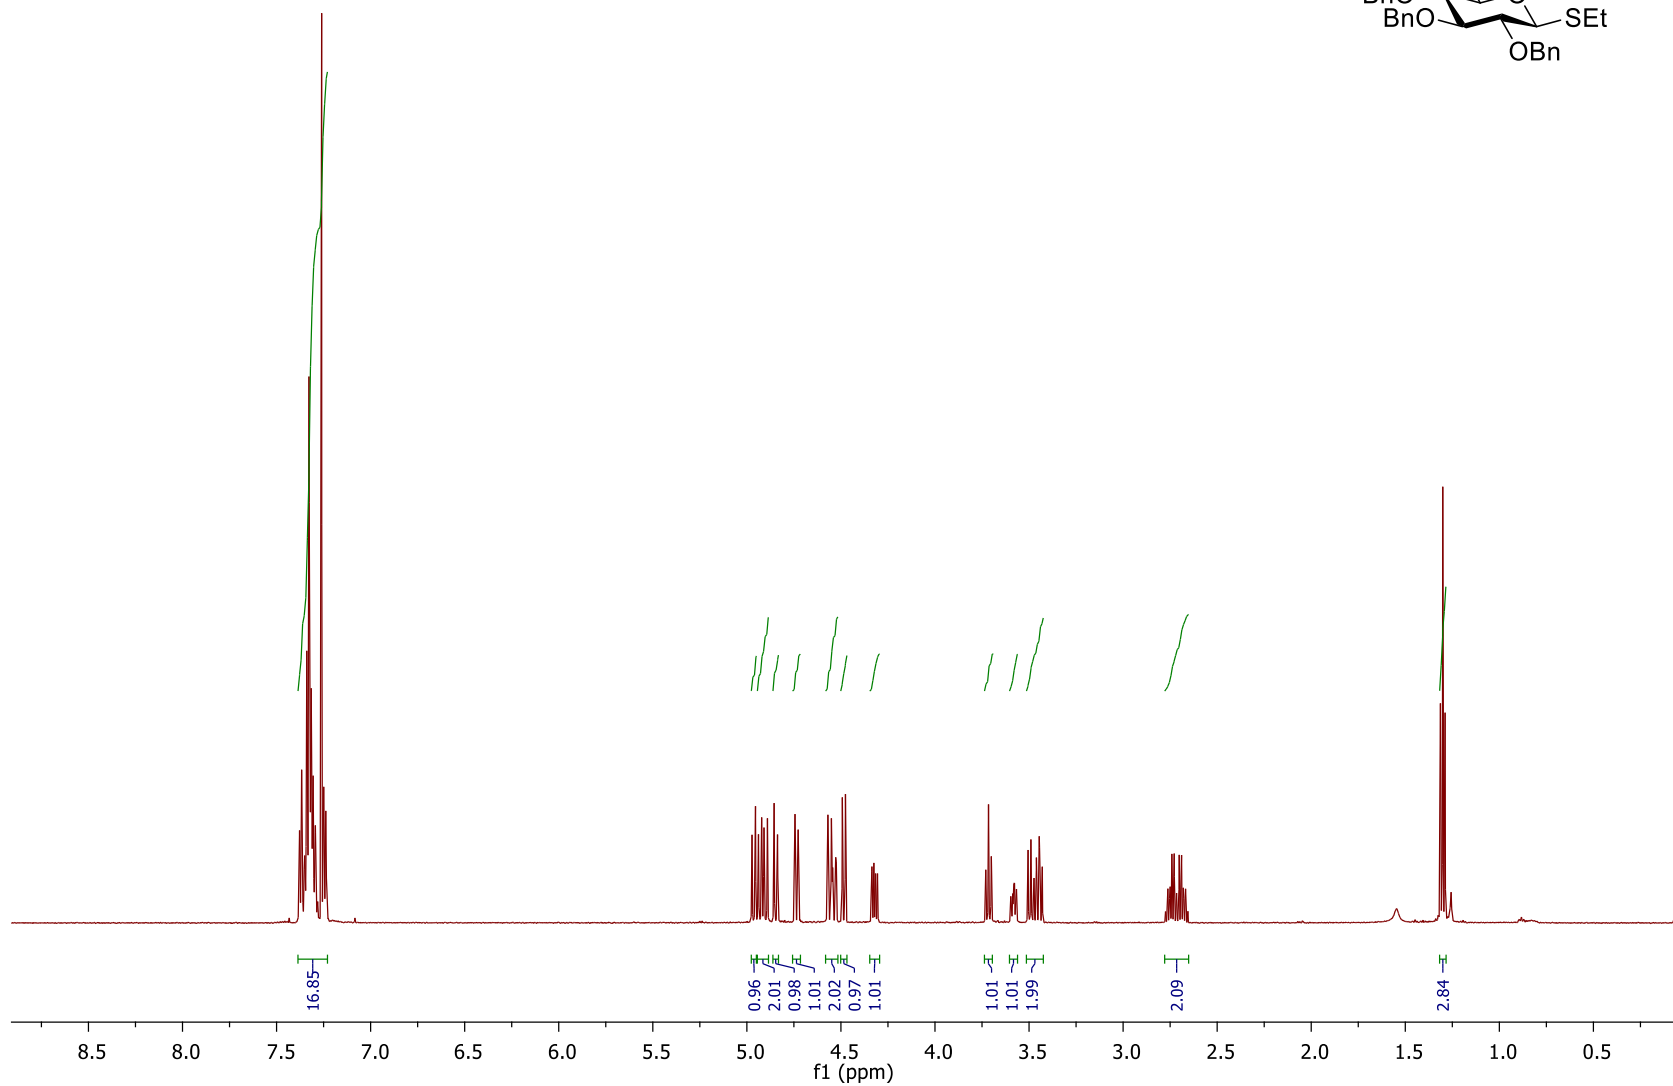

<sup>13</sup>C NMR (150 MHz, CDCl<sub>3</sub>) Spectrum of Ethyl 2,3,4-tri-*O*-benzyl-6-*O*-trifluoroacetyl-1-thio-β-D-glucopyranoside (**30**)

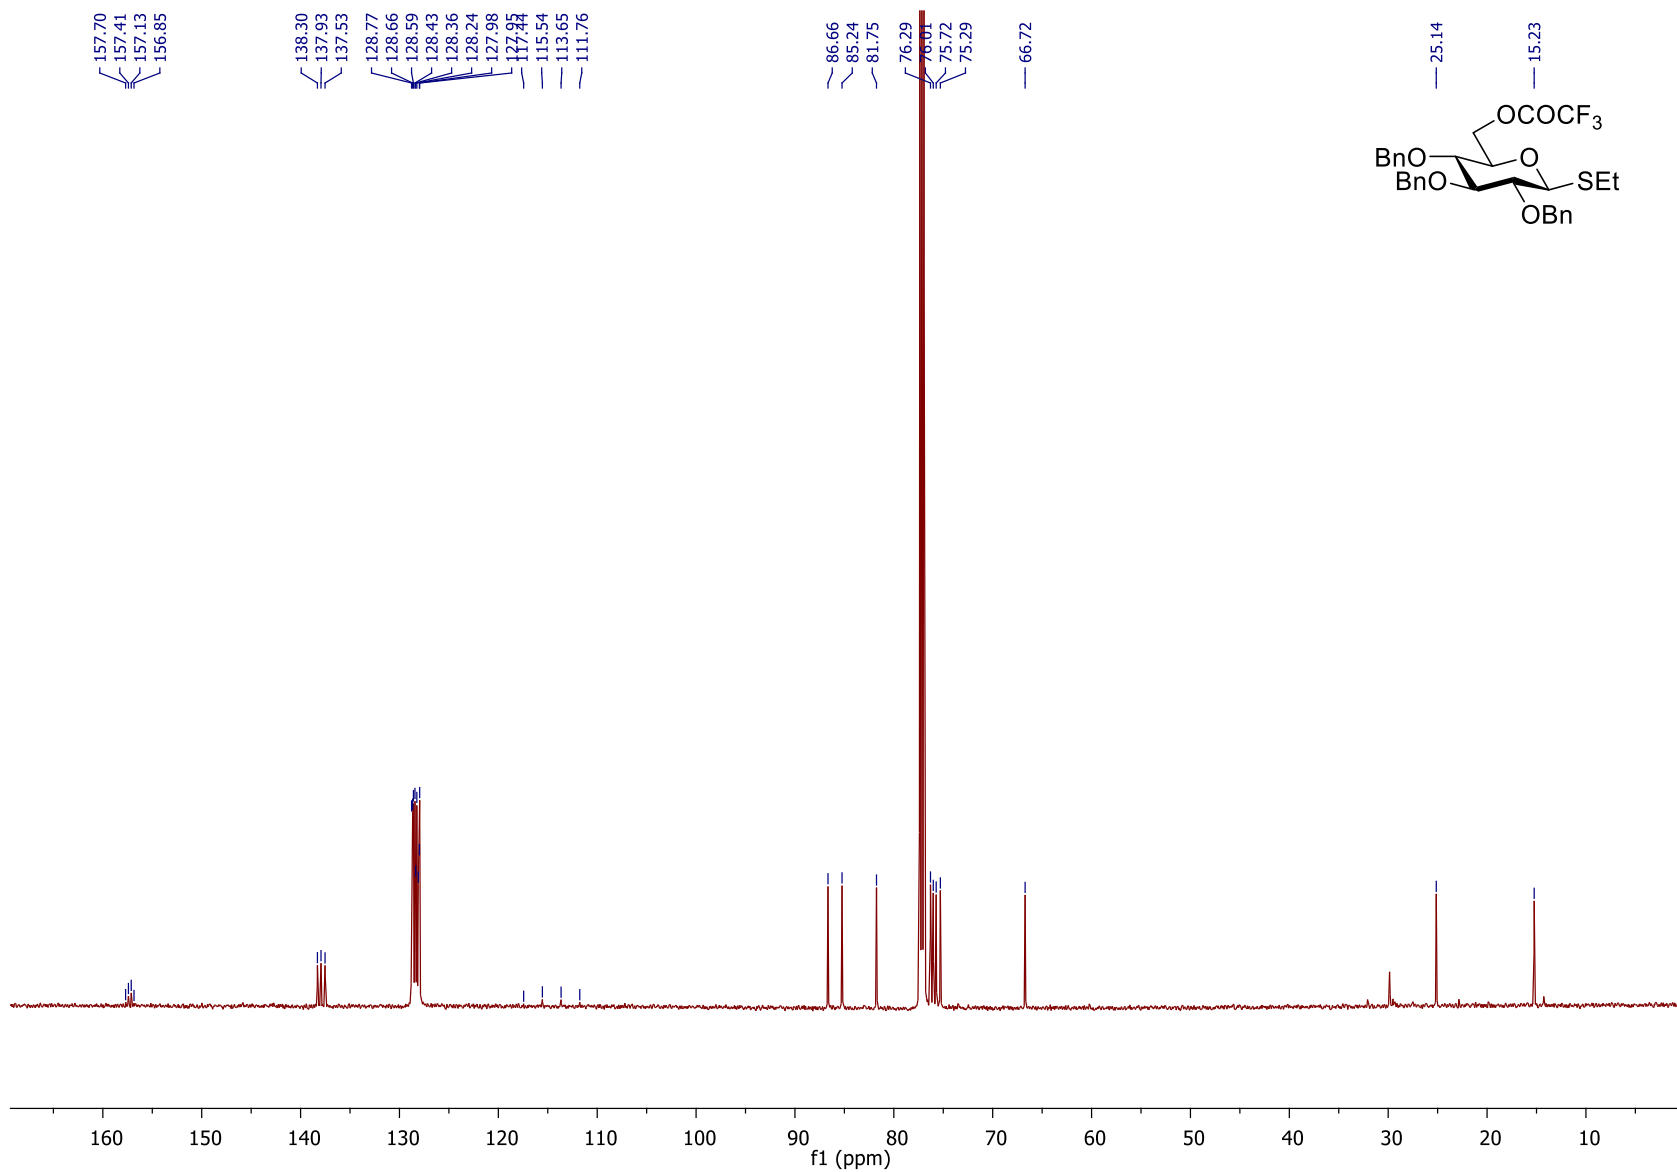

$^{19}\text{F}$  NMR (376 MHz,  $\text{CDCl}_3$ ) Spectrum of Ethyl 2,3,4-tri-*O*-benzyl-6-*O*-trifluoroacetyl-1-thio- $\beta$ -D-glucopyranoside (**30**)

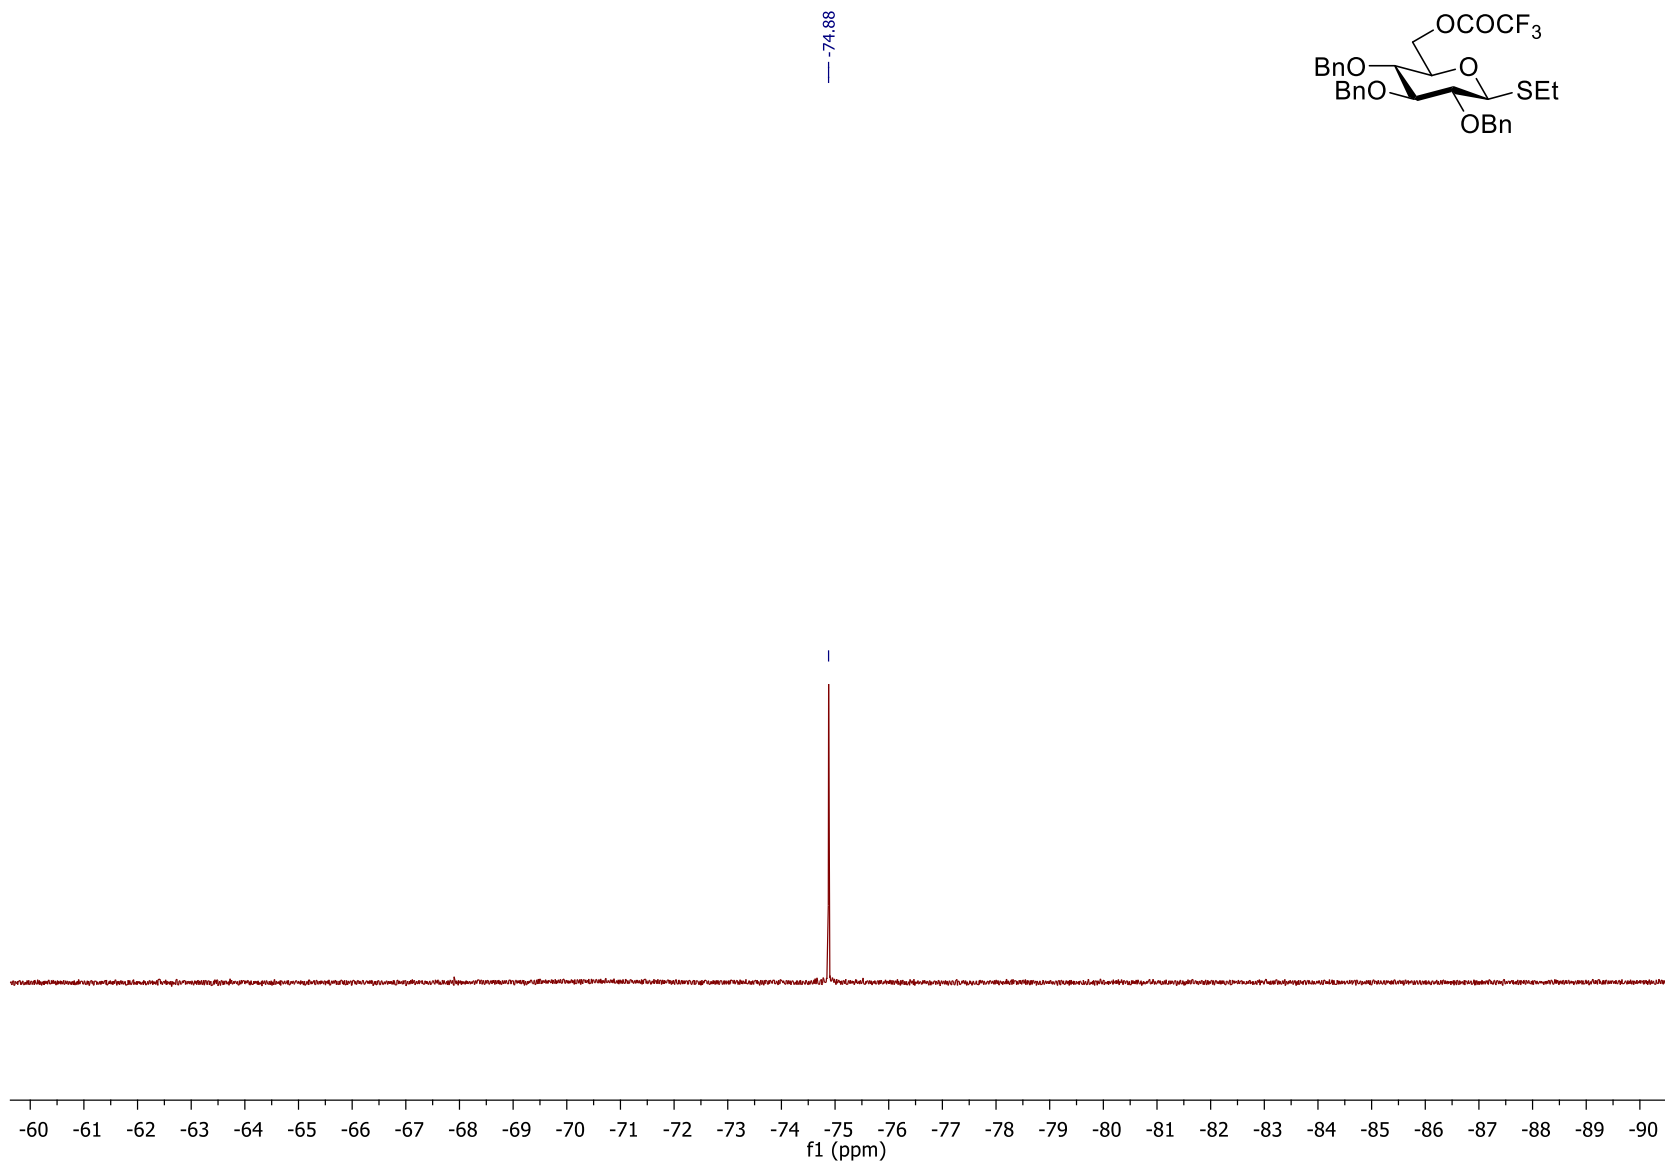

$^1\text{H}$  NMR (600 MHz,  $\text{C}_6\text{D}_6$ ) Spectrum of Ethyl 2,3,4-tri-*O*-benzyl-6-*O*-trifluoroacetyl-1-thio- $\beta$ -D-glucopyranoside (**30**)

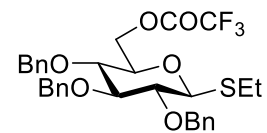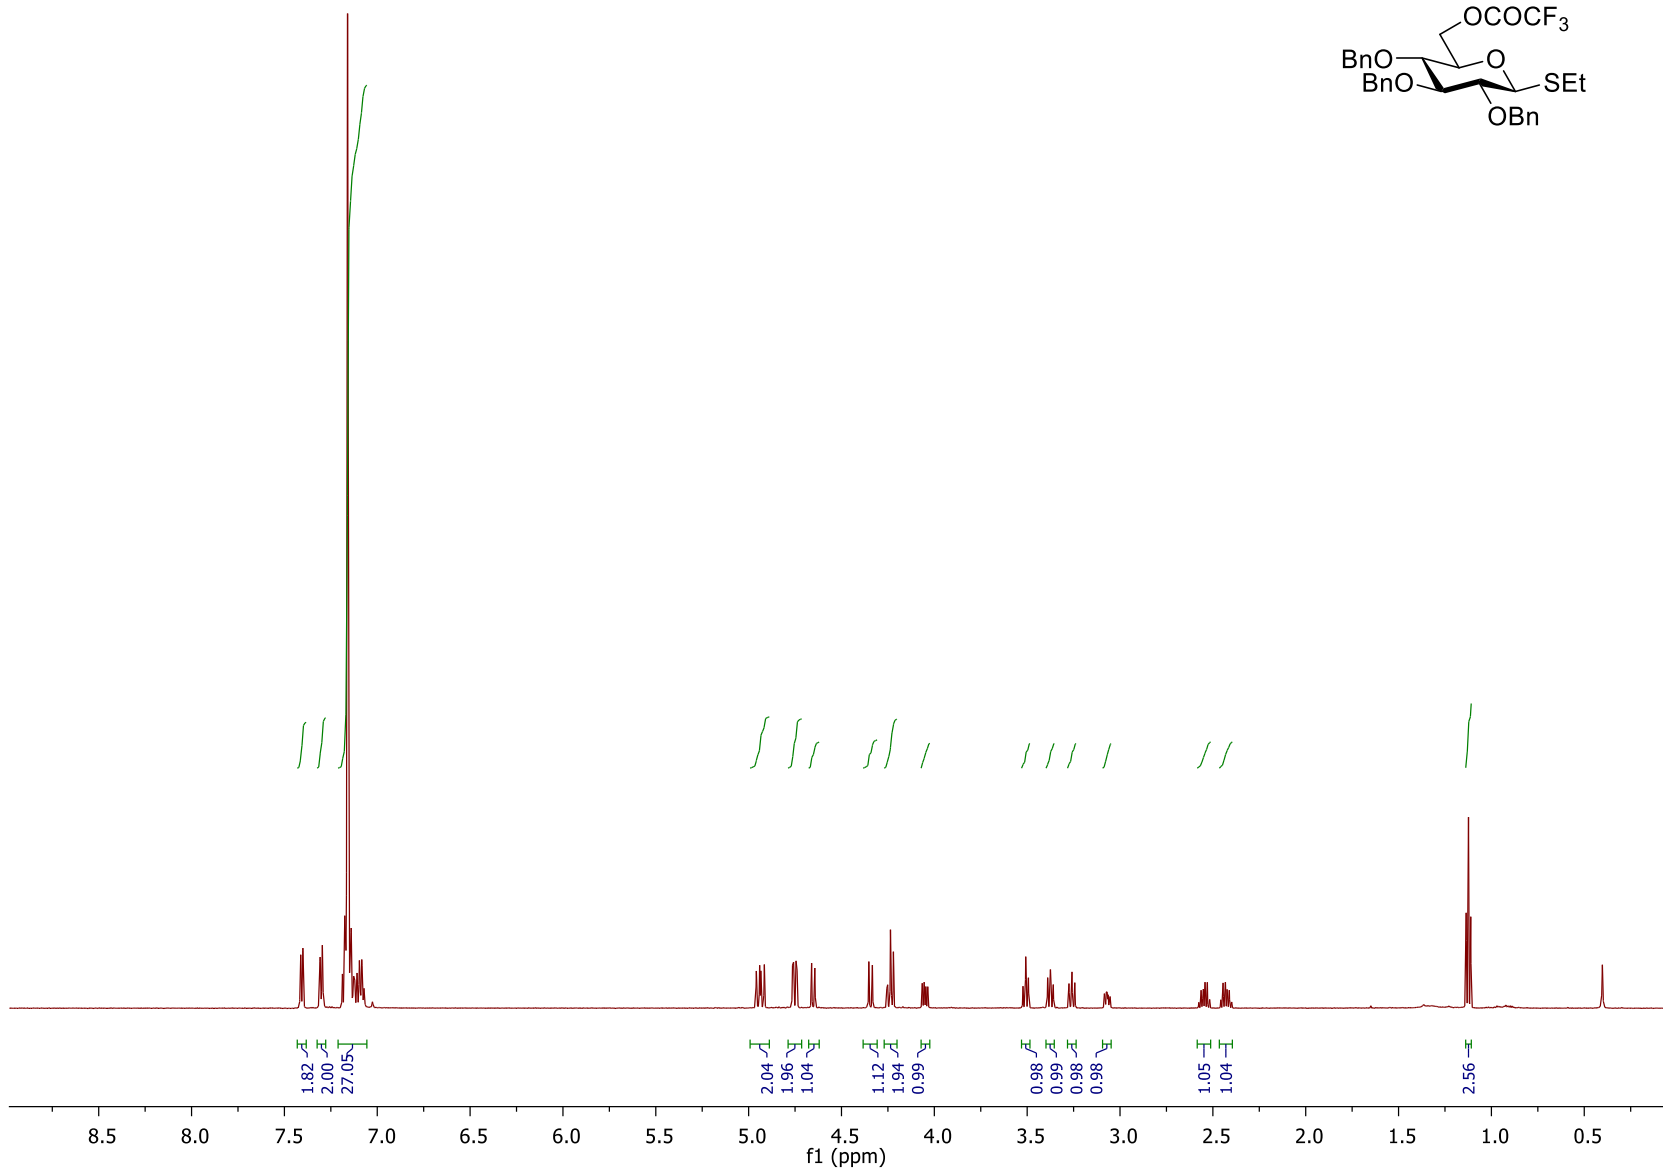

$^1\text{H}$  NMR (600 MHz,  $\text{CDCl}_3$ ) Spectrum of Ethyl 6-*O*-benzoyl-2,3,4-tri-*O*-benzyl-1-thio- $\beta$ -D-glucopyranoside (**31**)

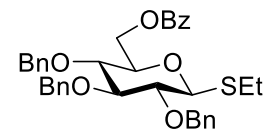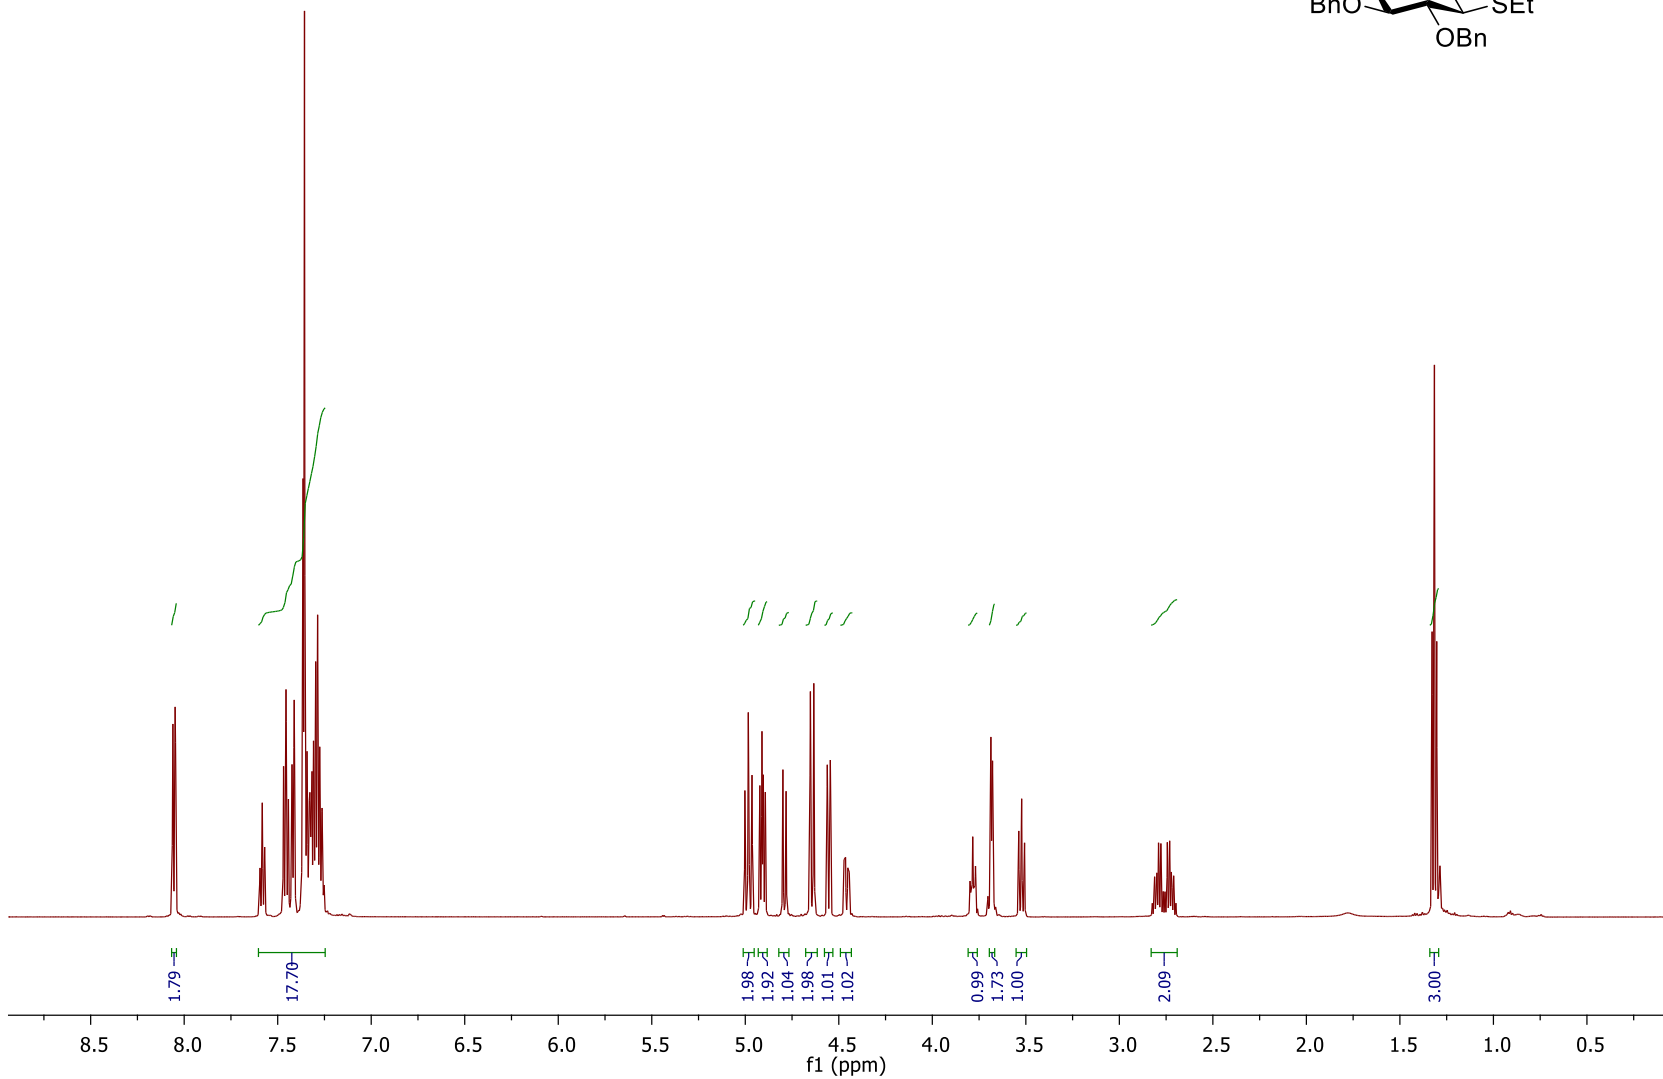



$^1\text{H}$  NMR (600 MHz,  $\text{C}_6\text{D}_6$ ) Spectrum of Ethyl 6-*O*-benzoyl-2,3,4-tri-*O*-benzyl-1-thio- $\beta$ -D-glucopyranoside (**31**)

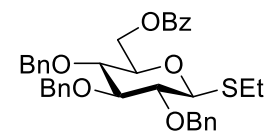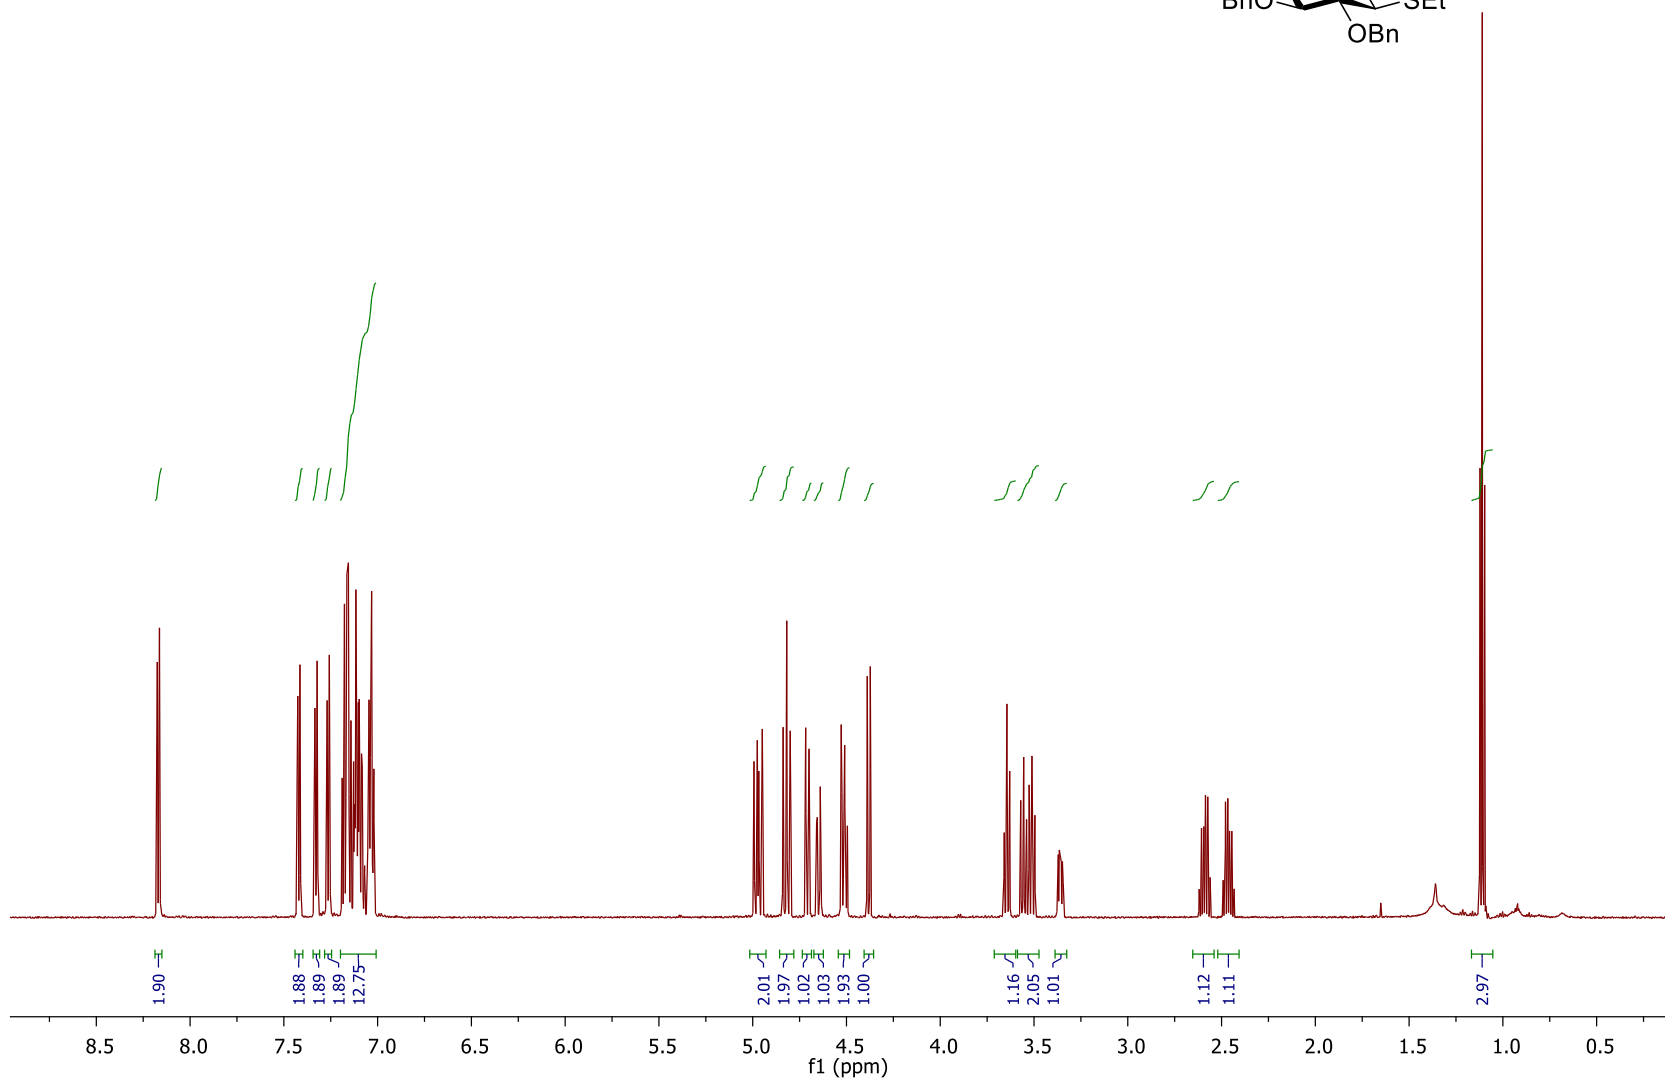

$^1\text{H}$  NMR (600 MHz,  $\text{CDCl}_3$ ) Spectrum of Ethyl (6*S*)-[6- $^2\text{H}_1$ ]-6-*O*-benzoyl-2,3,4-tri-*O*-benzyl-1-thio- $\beta$ -D-glucopyranoside (**6*S*-D-31**)

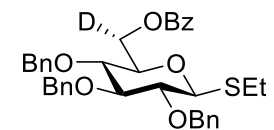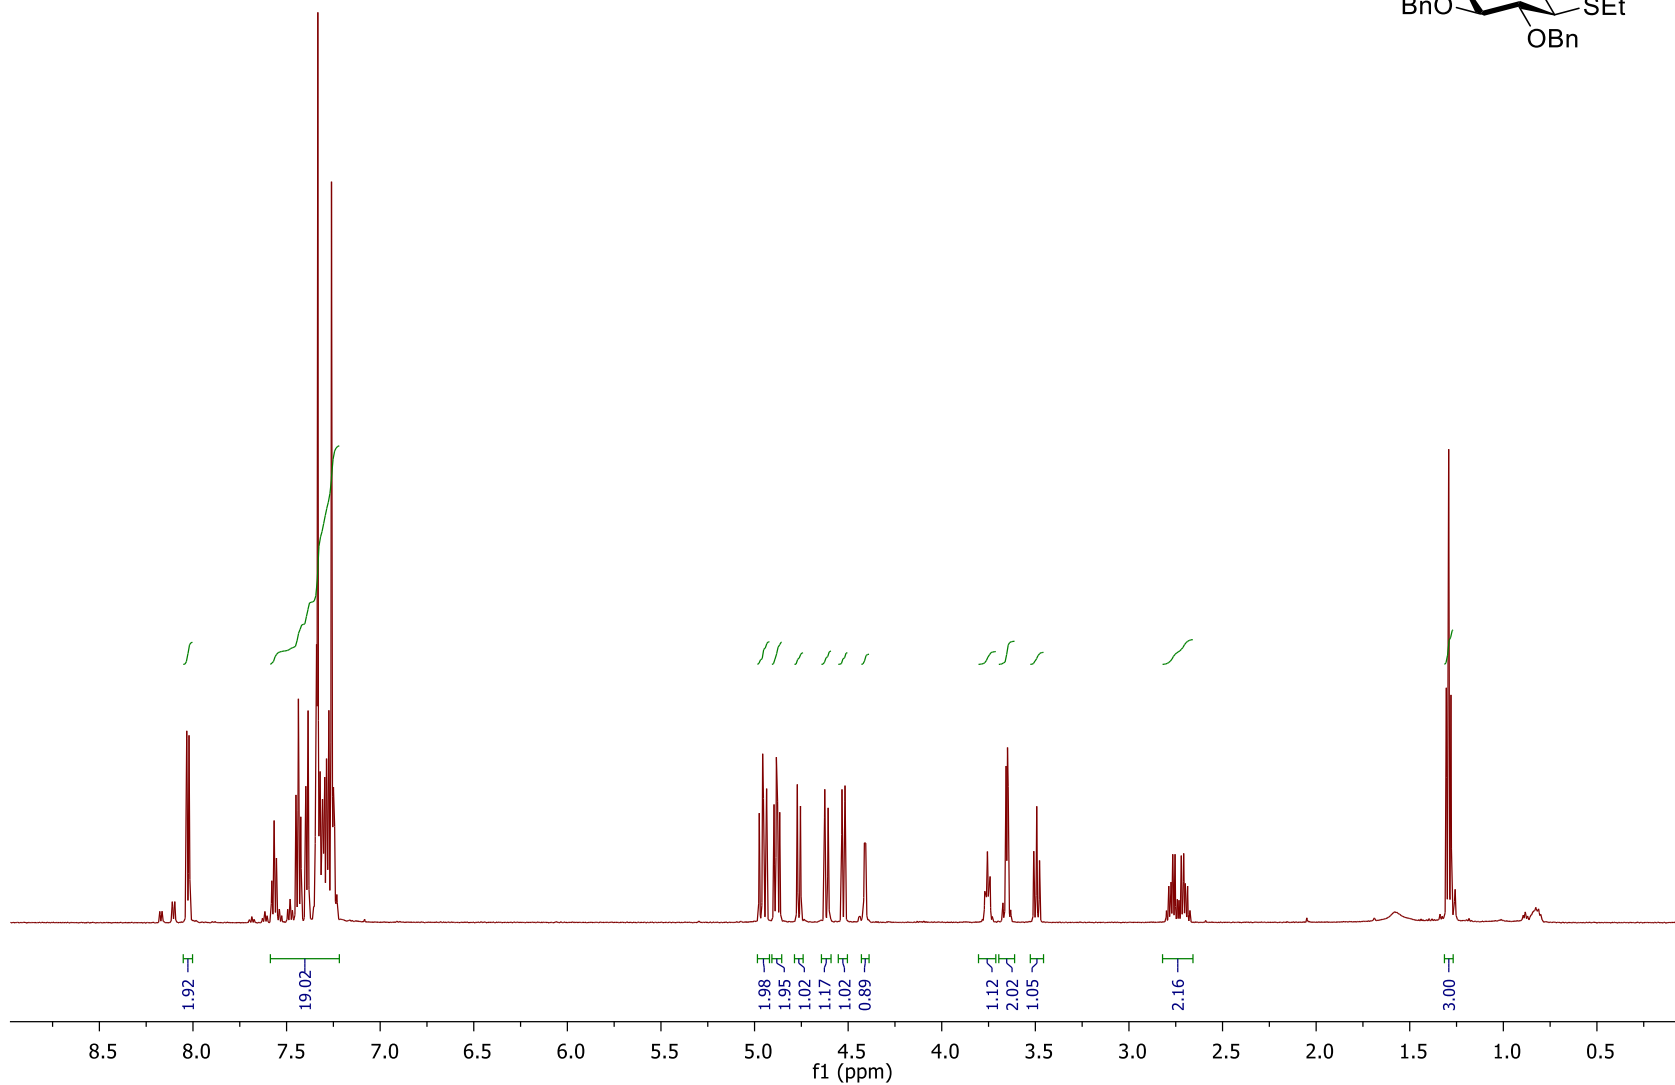

$^1\text{H}$  NMR (600 MHz,  $\text{C}_6\text{D}_6$ ) Spectrum of Ethyl (6*S*)-[6- $^2\text{H}_1$ ]-6-*O*-benzoyl-2,3,4-tri-*O*-benzyl-1-thio- $\beta$ -D-glucopyranoside (**6S-D-31**)

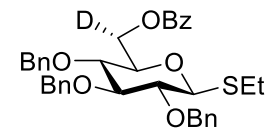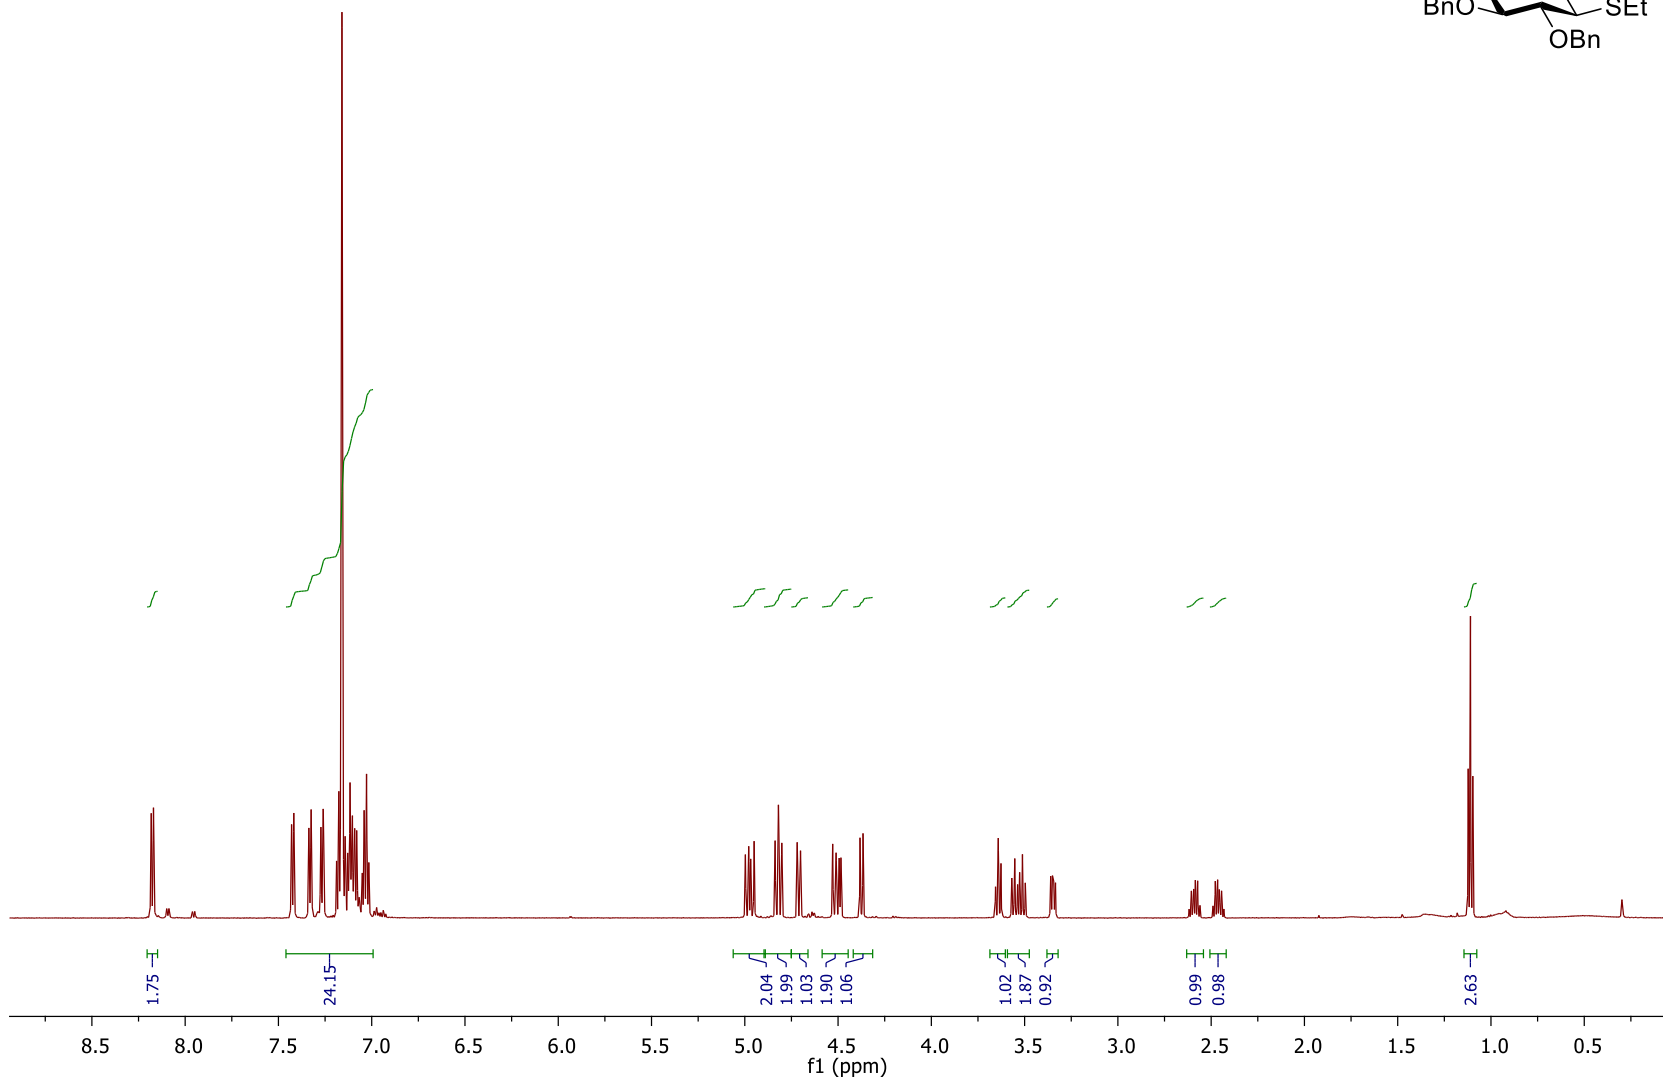

$^1\text{H}$  NMR (600 MHz,  $\text{CDCl}_3$ ) Spectrum of Ethyl 6-*O*-*p*-methylbenzoyl-2,3,4-tri-*O*-benzyl-1-thio- $\beta$ -D-glucopyranoside (**32**)

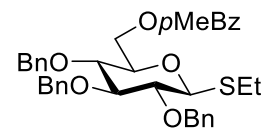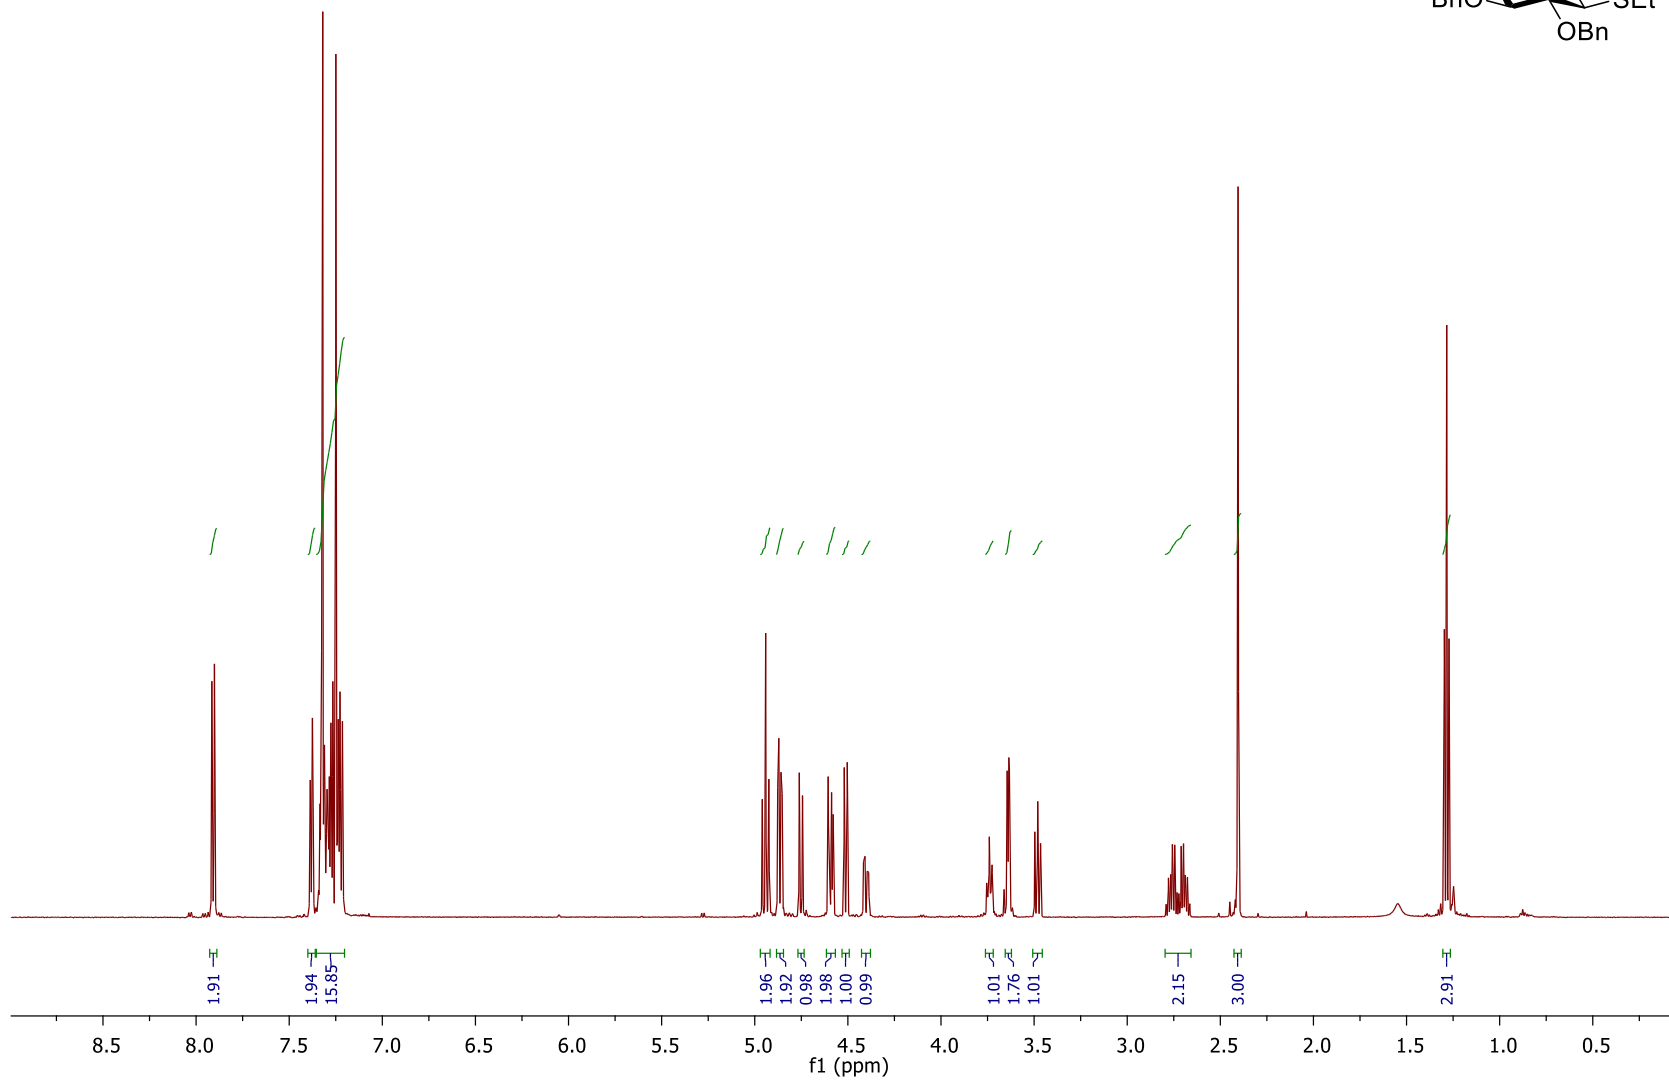

$^{13}\text{C}$  NMR (150 MHz,  $\text{CDCl}_3$ ) Spectrum of Ethyl 6-*O*-*p*-methylbenzoyl-2,3,4-tri-*O*-benzyl-1-thio- $\beta$ -D-glucopyranoside (**32**)

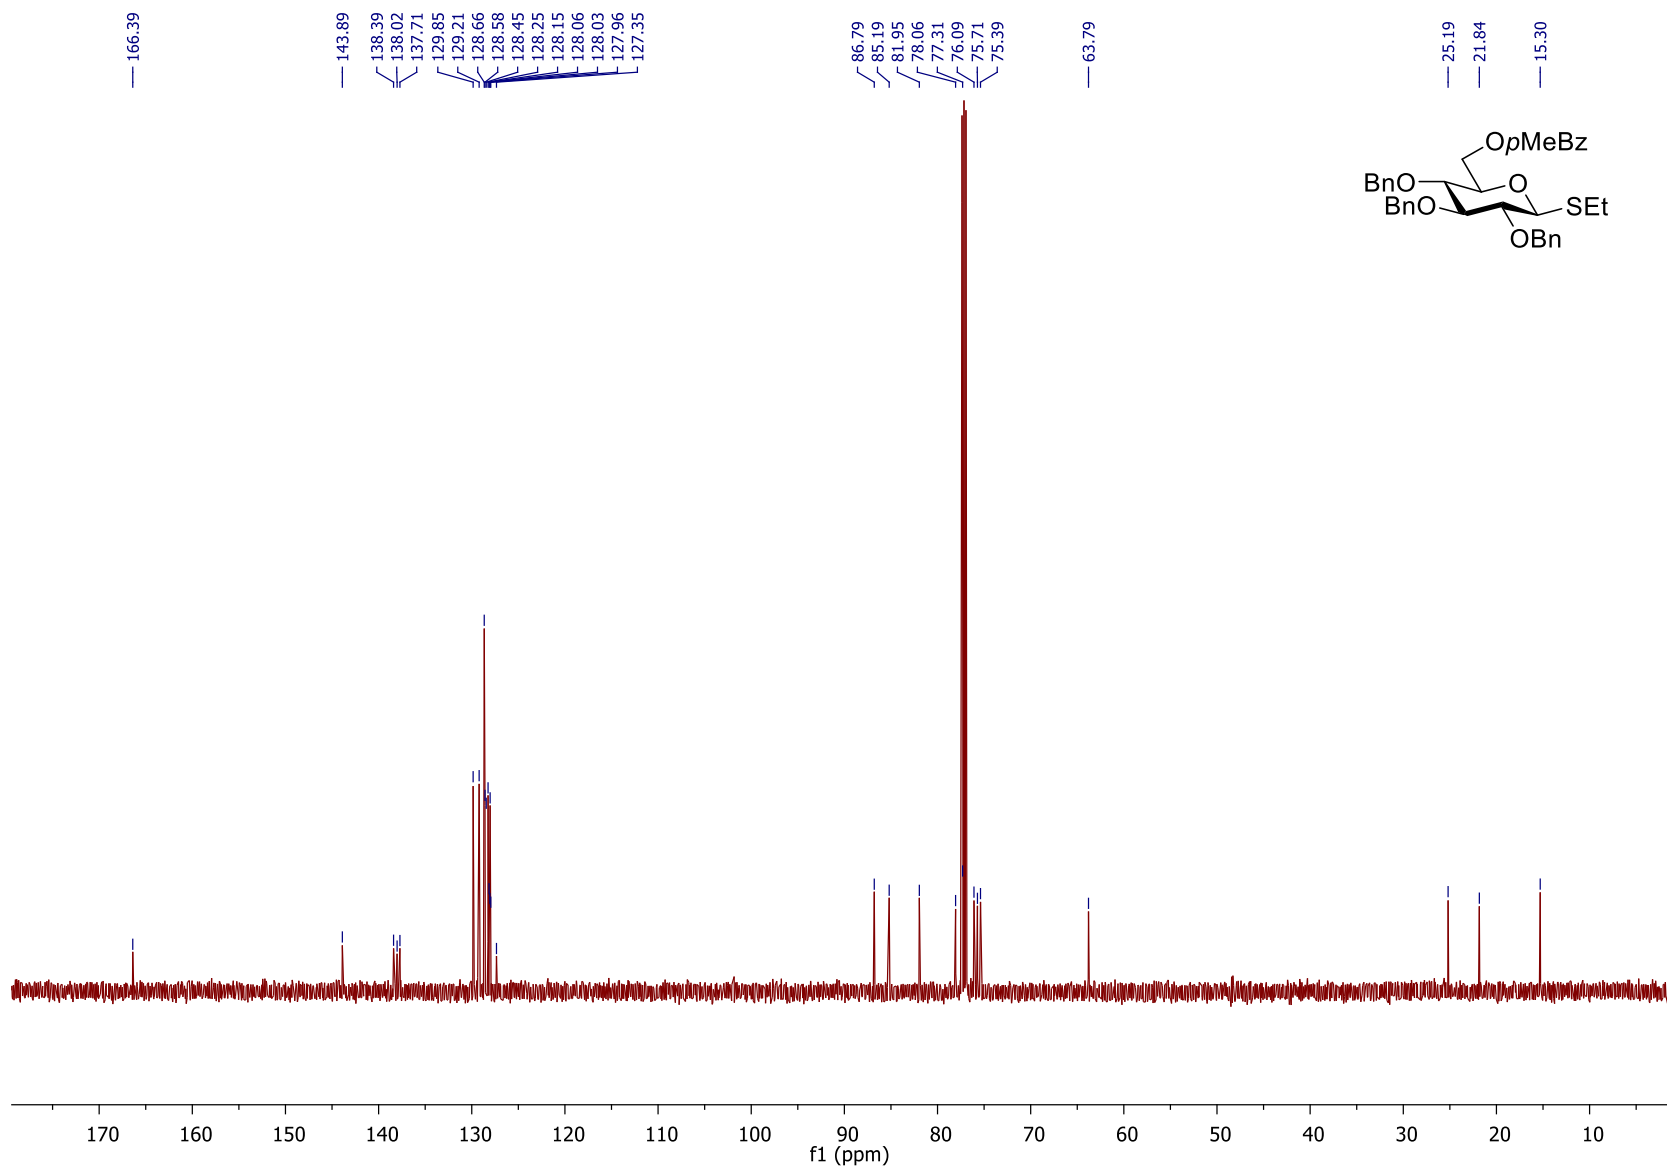

Simulated  $^1\text{H}$  NMR and  $^1\text{H}$  NMR (600 MHz,  $\text{CDCl}_3$ ) Spectrum of Ethyl 6-*O*-*p*-methylbenzoyl-2,3,4-tri-*O*-benzyl-1-thio- $\beta$ -D-glucopyranoside (**32**)

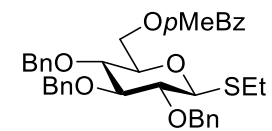

Experimental  $^1\text{H}$ -NMR (600 MHz,  $\text{CDCl}_3$ )

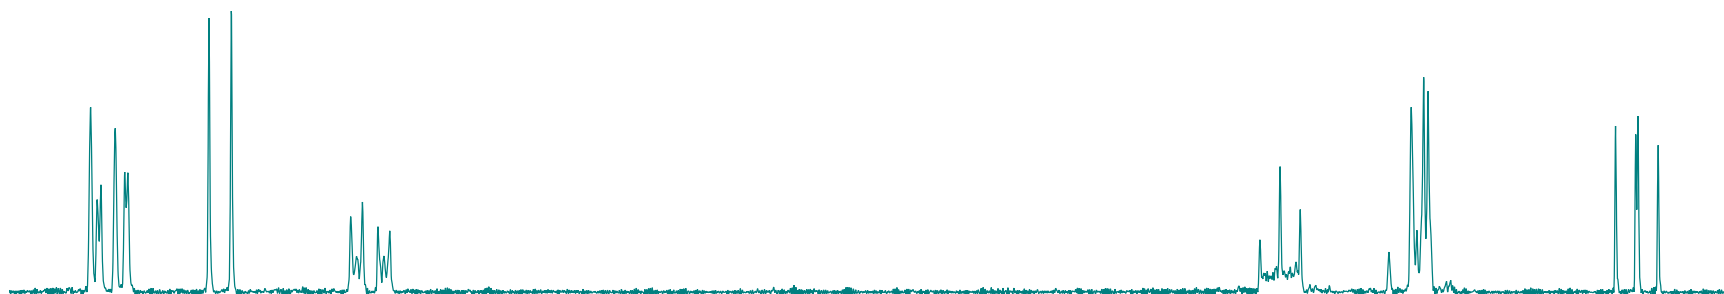

Simulated  $^1\text{H}$ -NMR

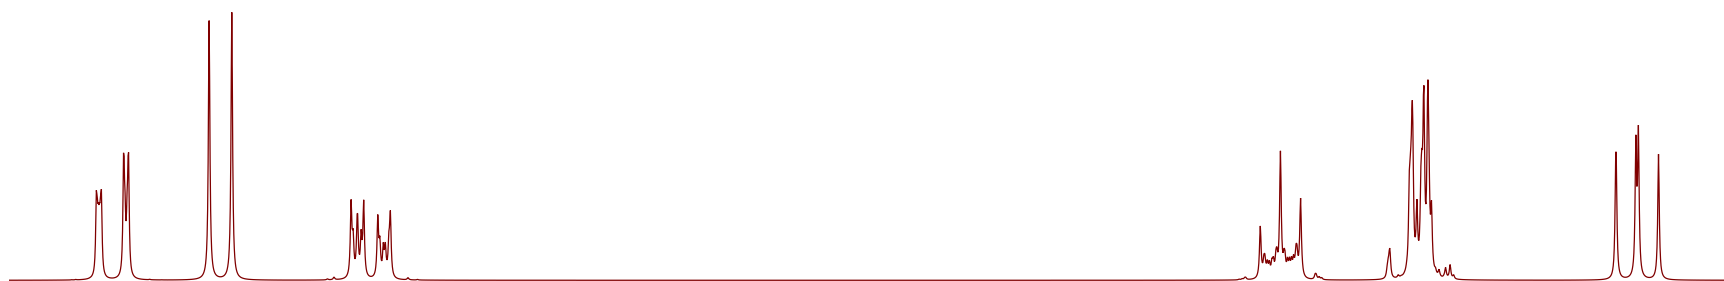

4.65 4.60 4.55 4.50 4.45 4.40 4.35 4.30 4.25 4.20 4.15 4.10 4.05 4.00 3.95 3.90 3.85 3.80 3.75 3.70 3.65 3.60 3.55 3.50 3.45  
f1s(ppm)

$^1\text{H}$  NMR (600 MHz,  $\text{C}_6\text{D}_6$ ) Spectrum of Ethyl 6-*O*-*p*-methylbenzoyl-2,3,4-tri-*O*-benzyl-1-thio- $\beta$ -D-glucopyranoside (**32**)

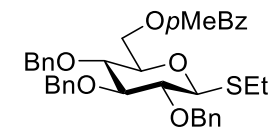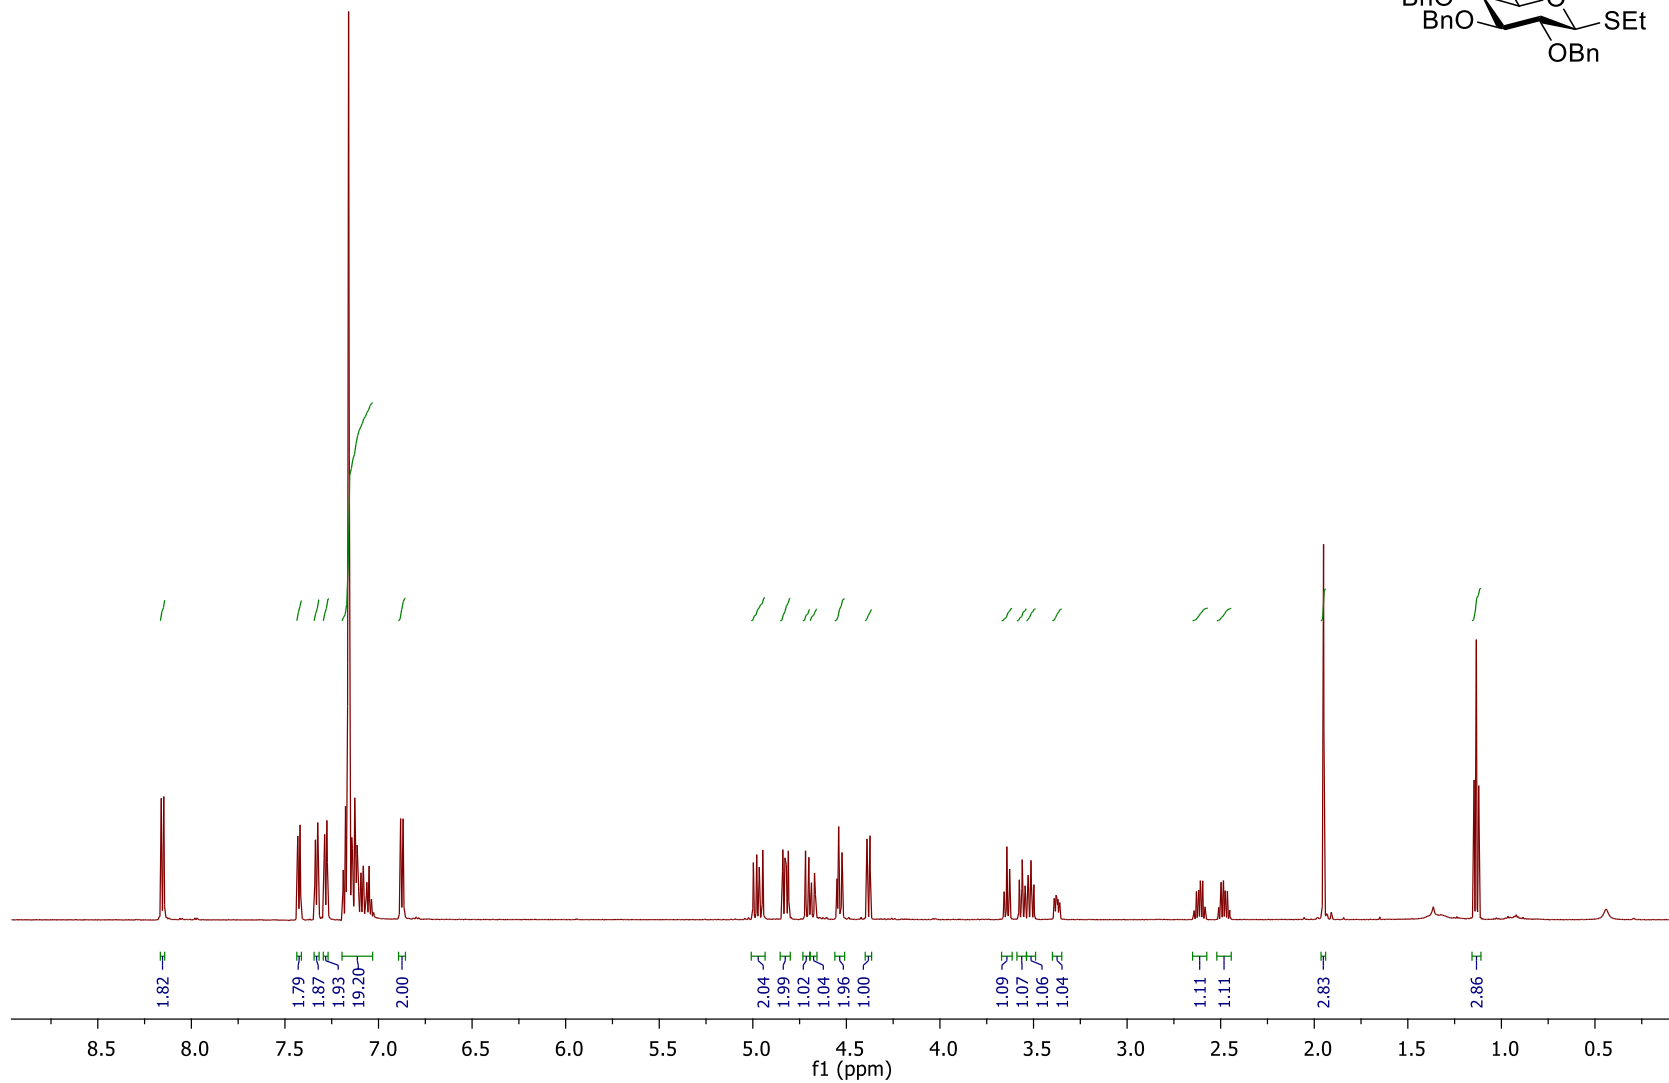

$^1\text{H}$  NMR (600 MHz,  $\text{CDCl}_3$ ) Spectrum of Ethyl (6*S*)-[6- $^2\text{H}_1$ ]-6-*O*-*p*-methylbenzoyl-2,3,4-tri-*O*-benzyl-1-thio- $\beta$ -D-glucopyranoside (6*S*-D-32)

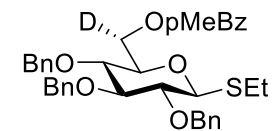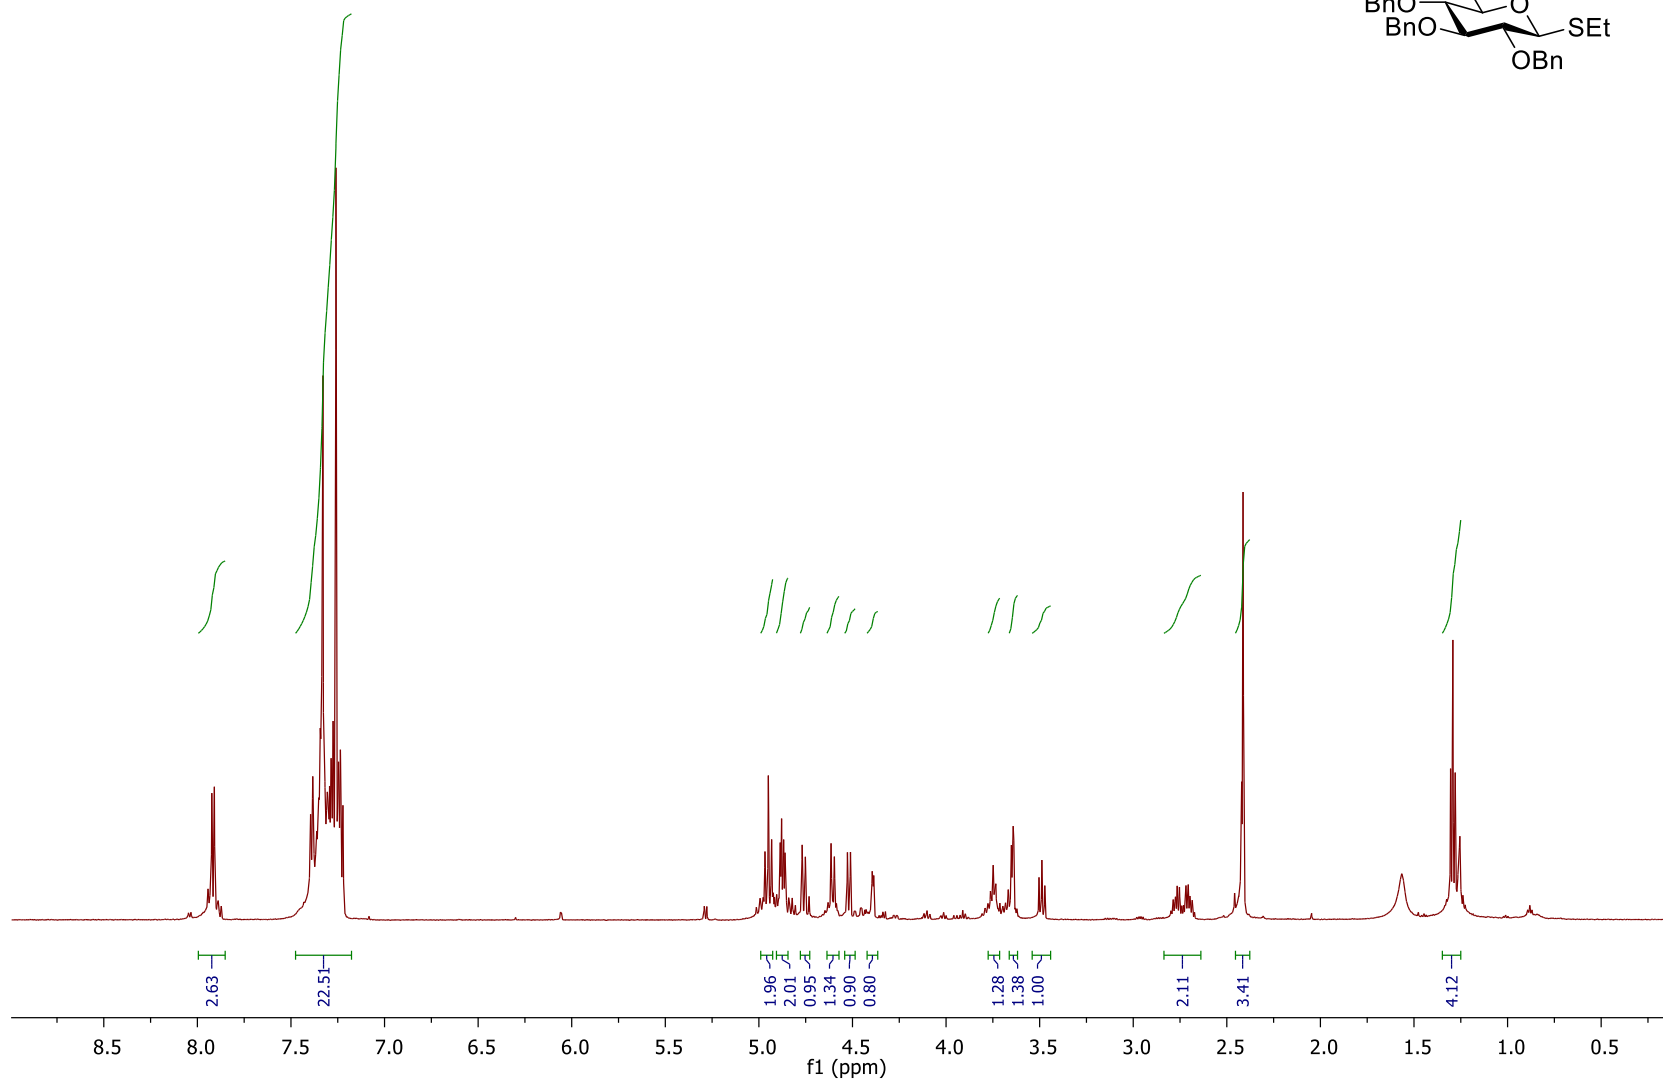



<sup>1</sup>H NMR (600 MHz, C<sub>6</sub>D<sub>6</sub>) Spectrum of Ethyl (6*S*)-[6-<sup>2</sup>H<sub>1</sub>]-6-*O-p*-methylbenzoyl-2,3,4-tri-*O*-benzyl-1-thio-β-D-glucopyranoside (**6S-D-32**)

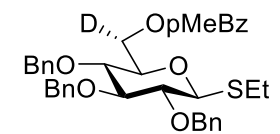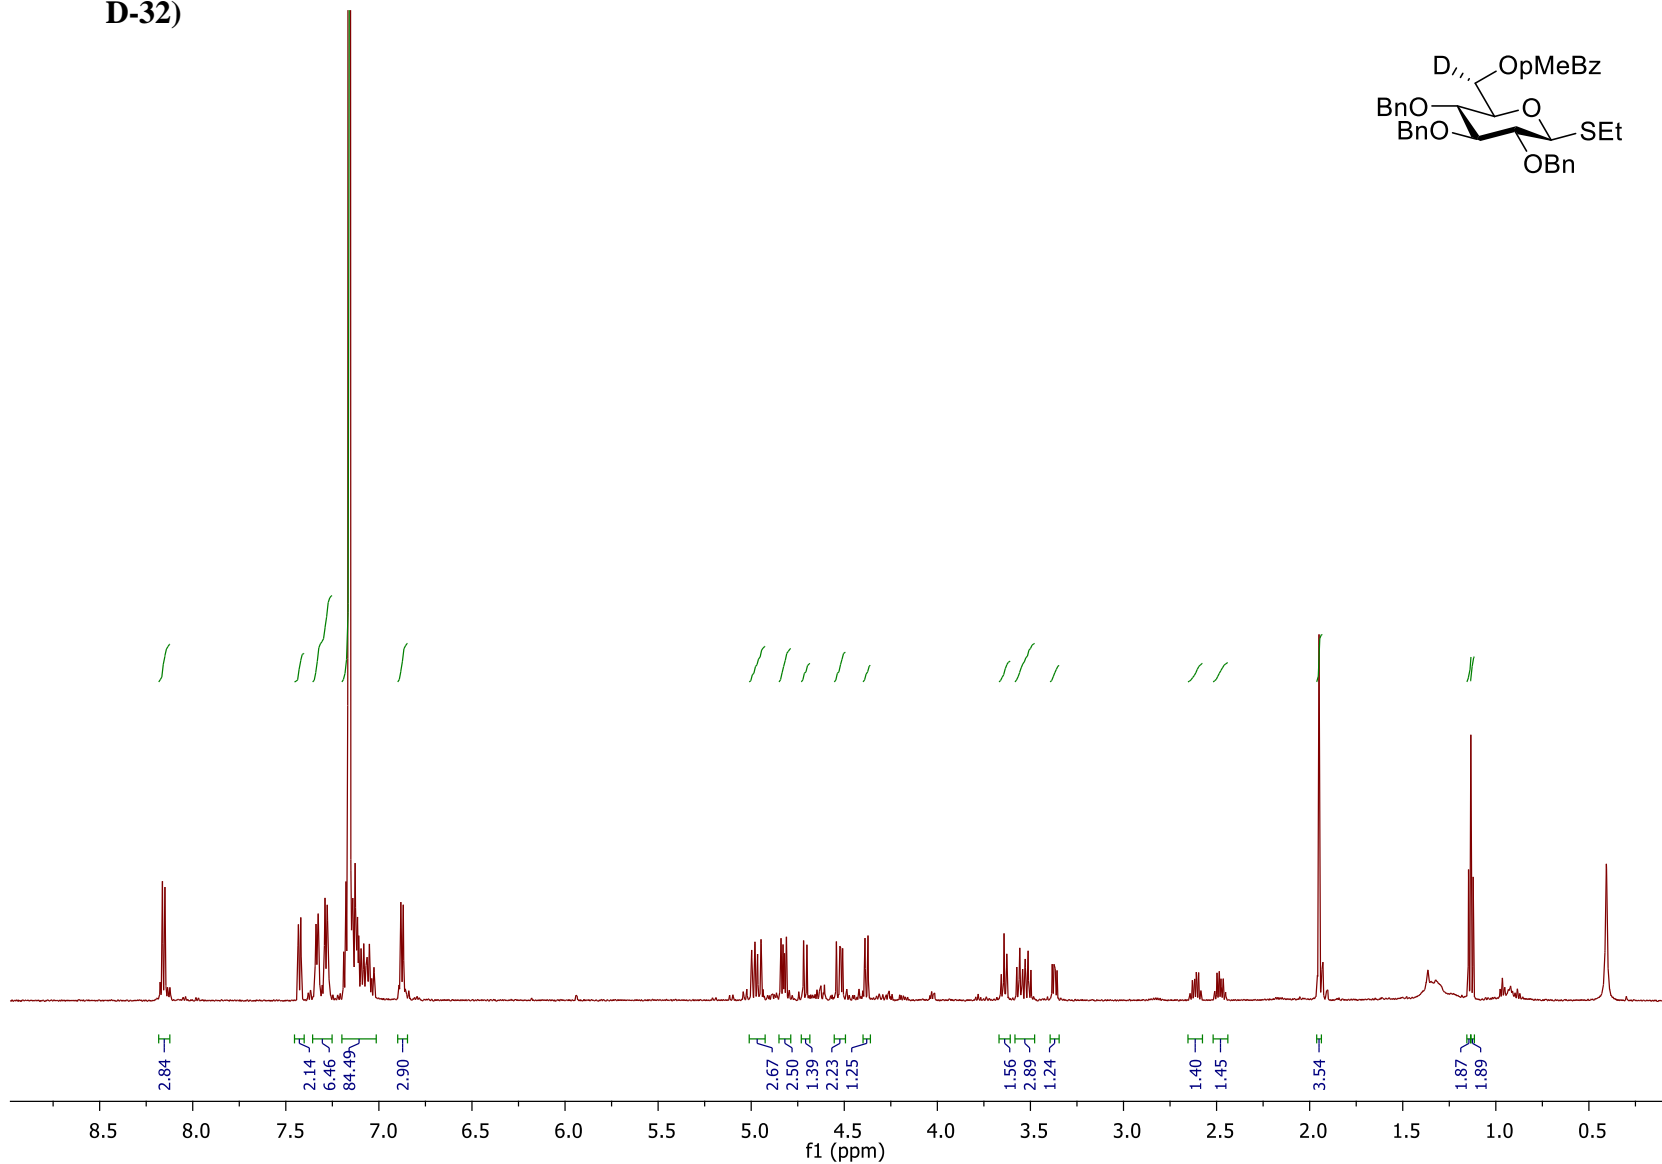

$^1\text{H}$  NMR (600 MHz,  $\text{CDCl}_3$ ) Spectrum of Ethyl 6-*O*-*p*-methoxybenzoyl-2,3,4-tri-*O*-benzyl-1-thio- $\beta$ -D-glucopyranoside (**33**)

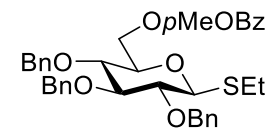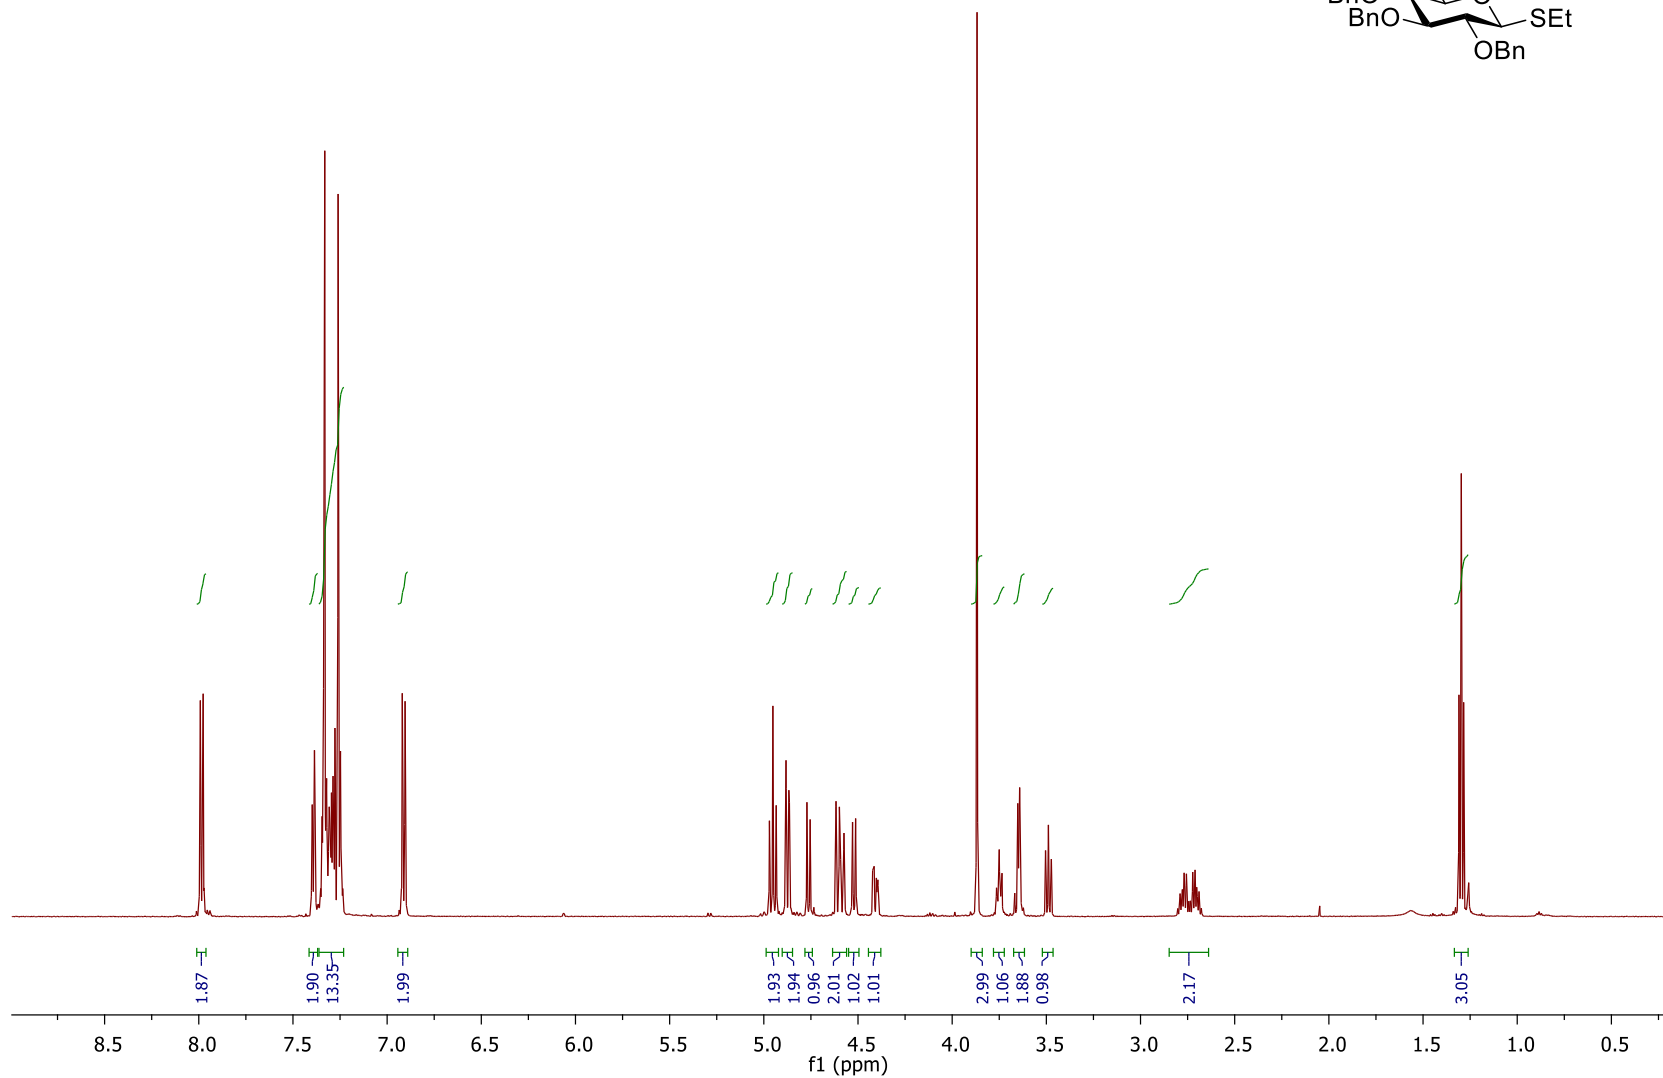

$^{13}\text{C}$  NMR (150 MHz,  $\text{CDCl}_3$ ) Spectrum of Ethyl 6-*O*-*p*-methoxybenzoyl-2,3,4-tri-*O*-benzyl-1-thio- $\beta$ -D-glucopyranoside (**33**)

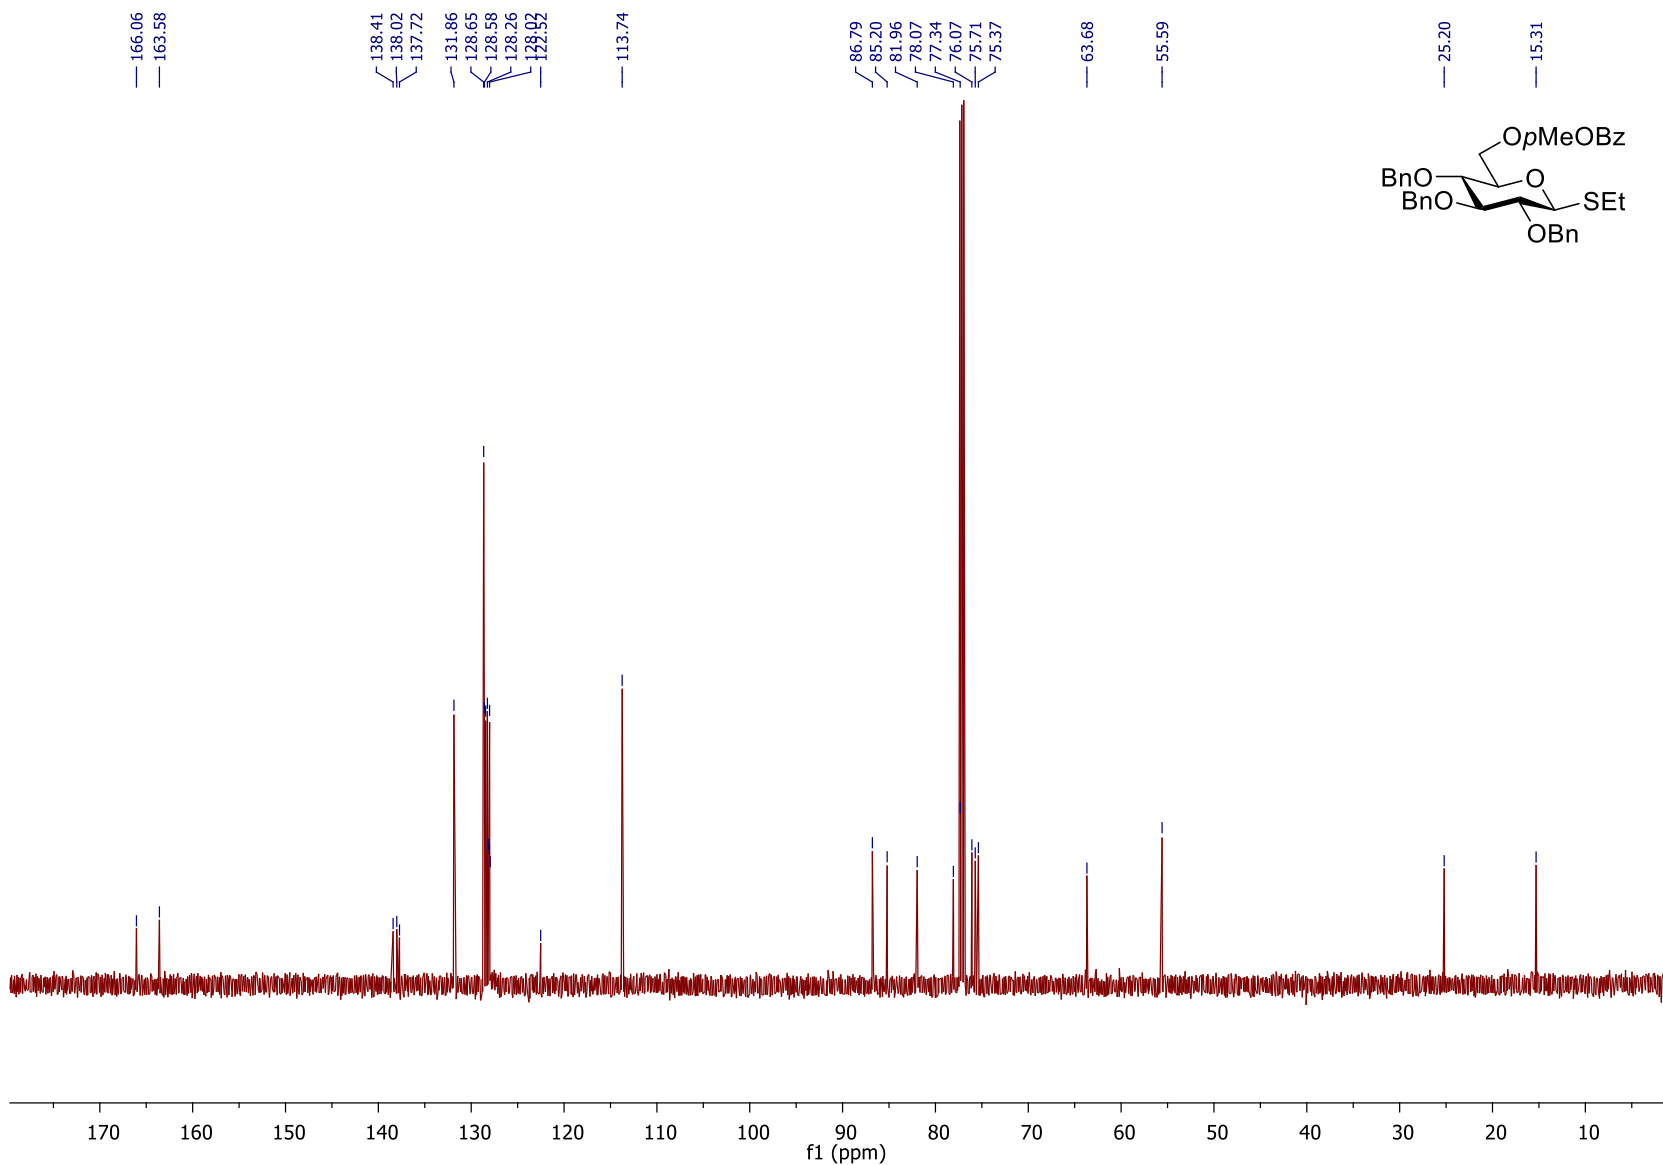

Simulated  $^1\text{H}$  NMR and  $^1\text{H}$  NMR (600 MHz,  $\text{CDCl}_3$ ) Spectrum of Ethyl 6-*O*-*p*-methoxybenzoyl-2,3,4-tri-*O*-benzyl-1-thio- $\beta$ -D-glucopyranoside (**33**)

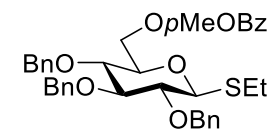

Experimental  $^1\text{H}$ -NMR (600 MHz,  $\text{CDCl}_3$ )

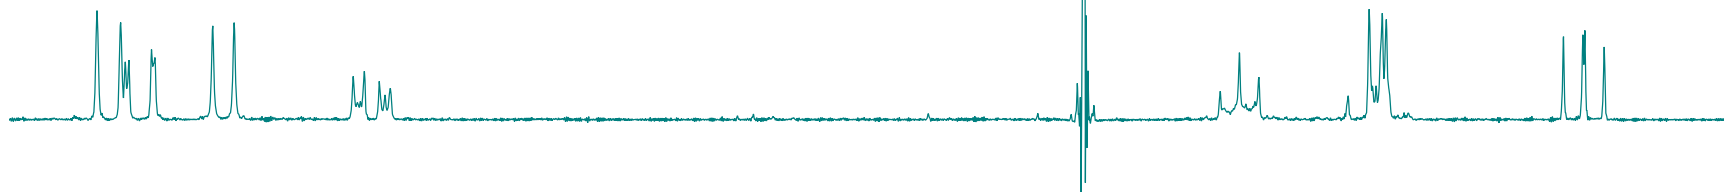

Simulated  $^1\text{H}$ -NMR

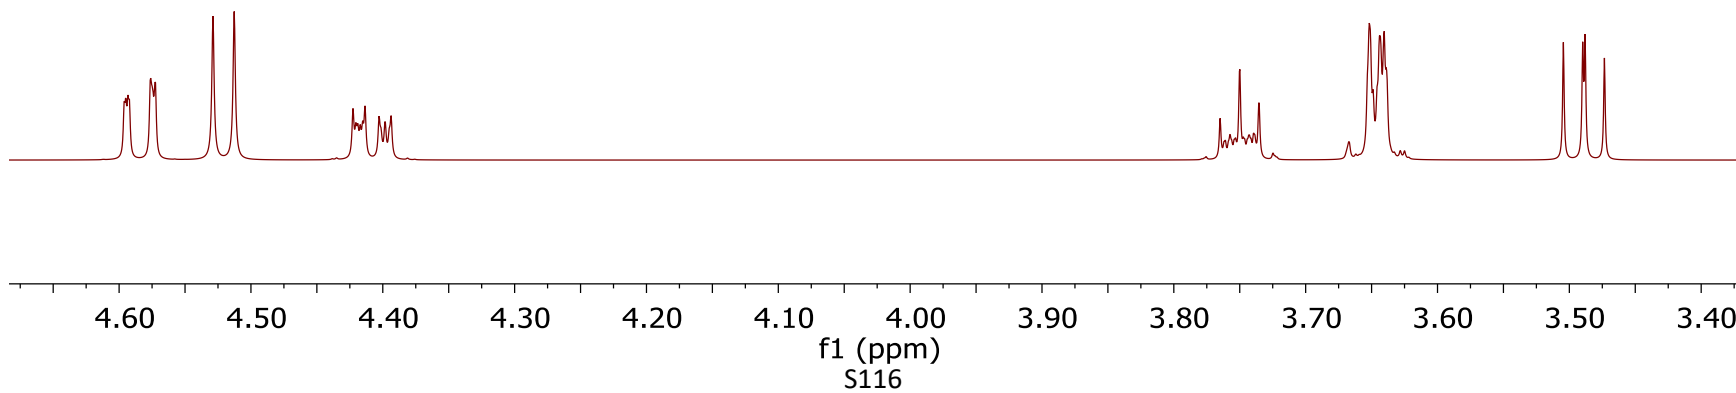

$^1\text{H}$  NMR (600 MHz,  $\text{C}_6\text{D}_6$ ) Spectrum of Ethyl 6-*O*-*p*-methoxybenzoyl-2,3,4-tri-*O*-benzyl-1-thio- $\beta$ -D-glucopyranoside (**33**)

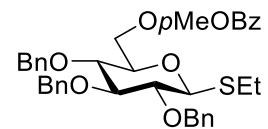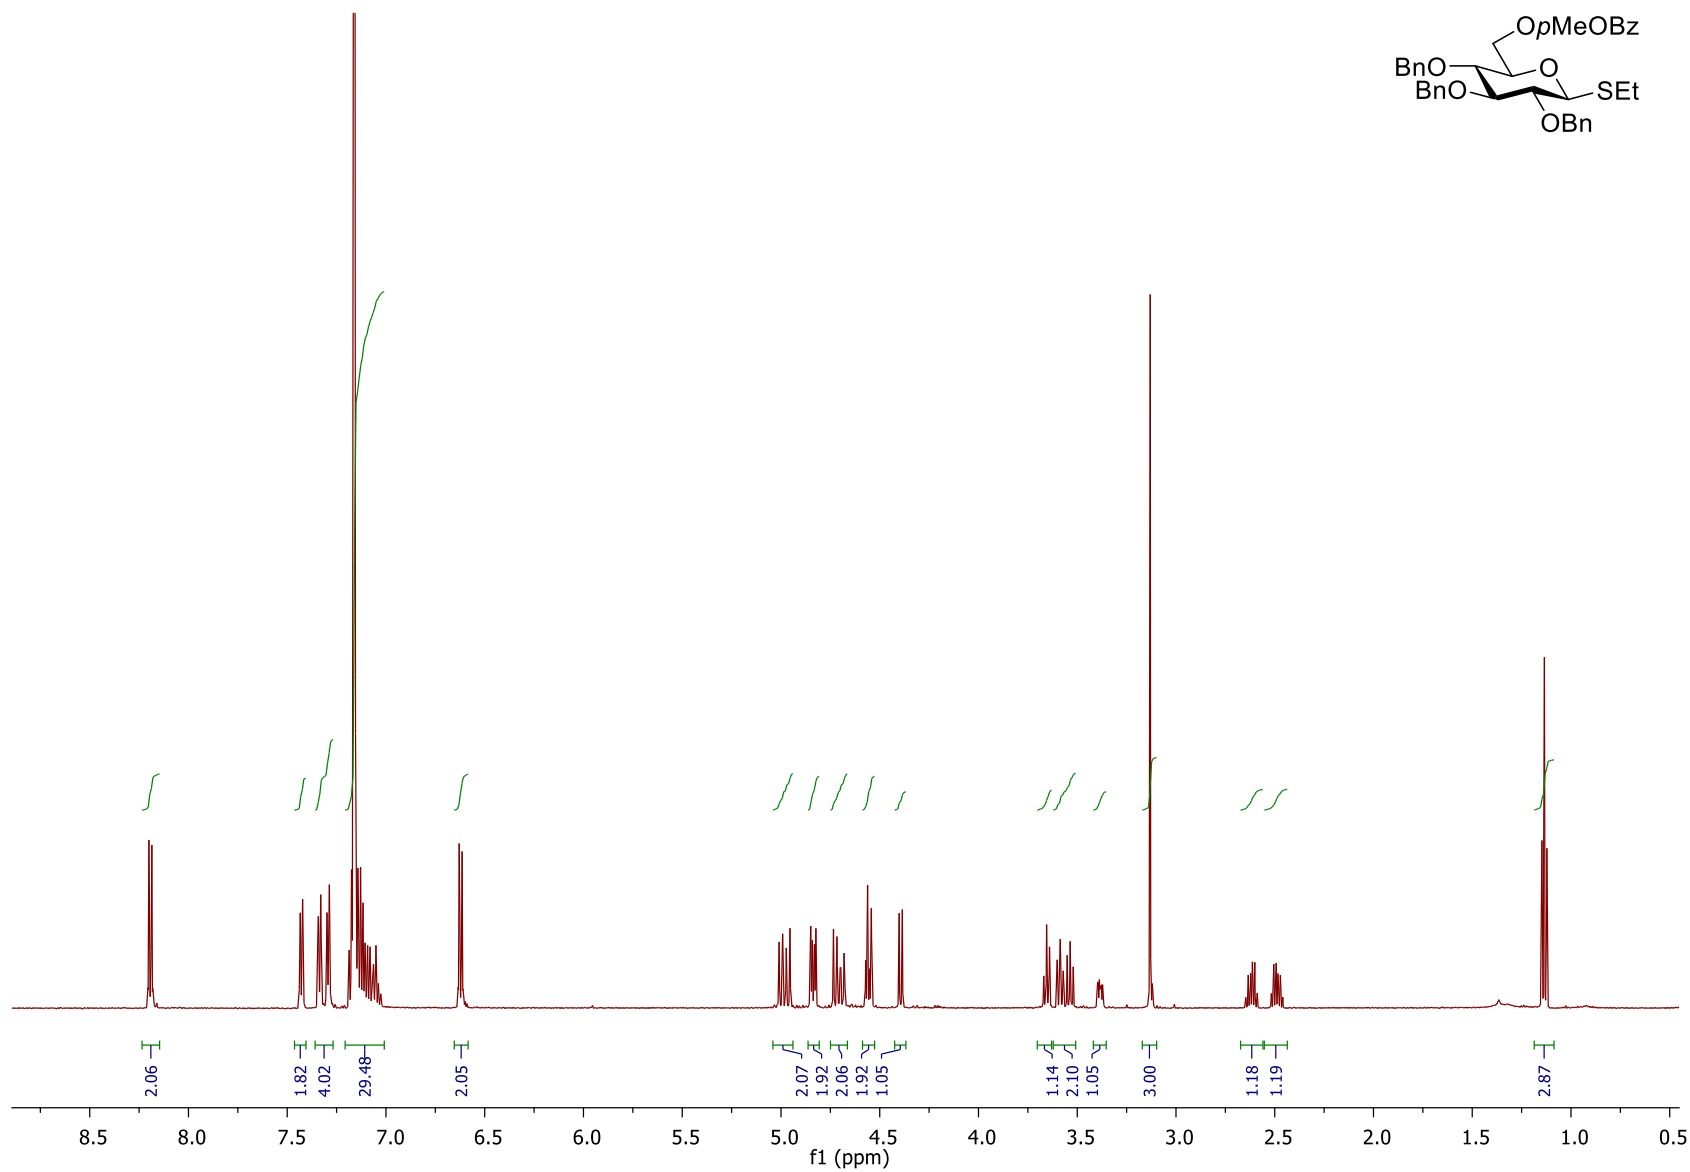

$^1\text{H}$  NMR (600 MHz,  $\text{CDCl}_3$ ) Spectrum of Ethyl (6*S*)-[6- $^2\text{H}_1$ ]-6-*O-p*-methoxybenzoyl-2,3,4-tri-*O*-benzyl-1-thio- $\beta$ -D-glucopyranoside (**6*S*-D-33**)

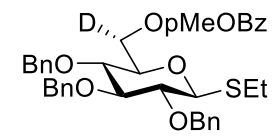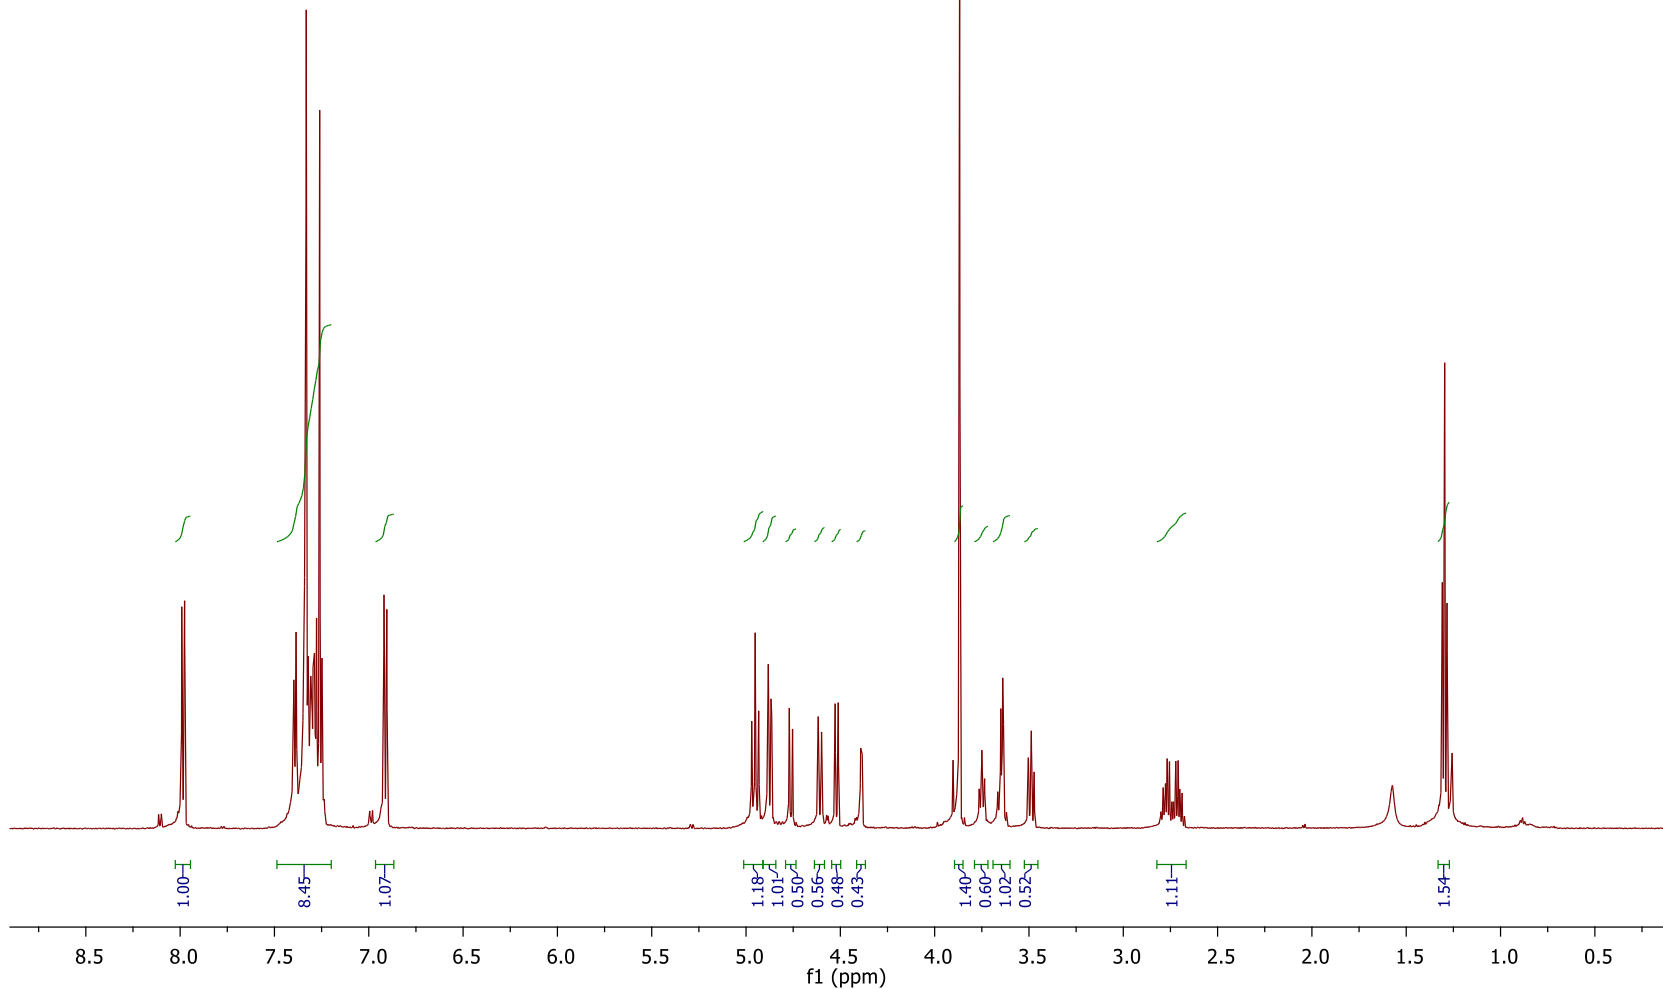

<sup>1</sup>H NMR (600 MHz, C<sub>6</sub>D<sub>6</sub>) Spectrum of Ethyl (6*S*)-[6-<sup>2</sup>H<sub>1</sub>]-6-*O*-*p*-methoxybenzoyl-2,3,4-tri-*O*-benzyl-1-thio-β-D-glucopyranoside (**6S-D-33**)

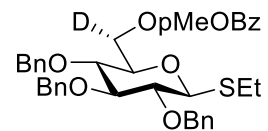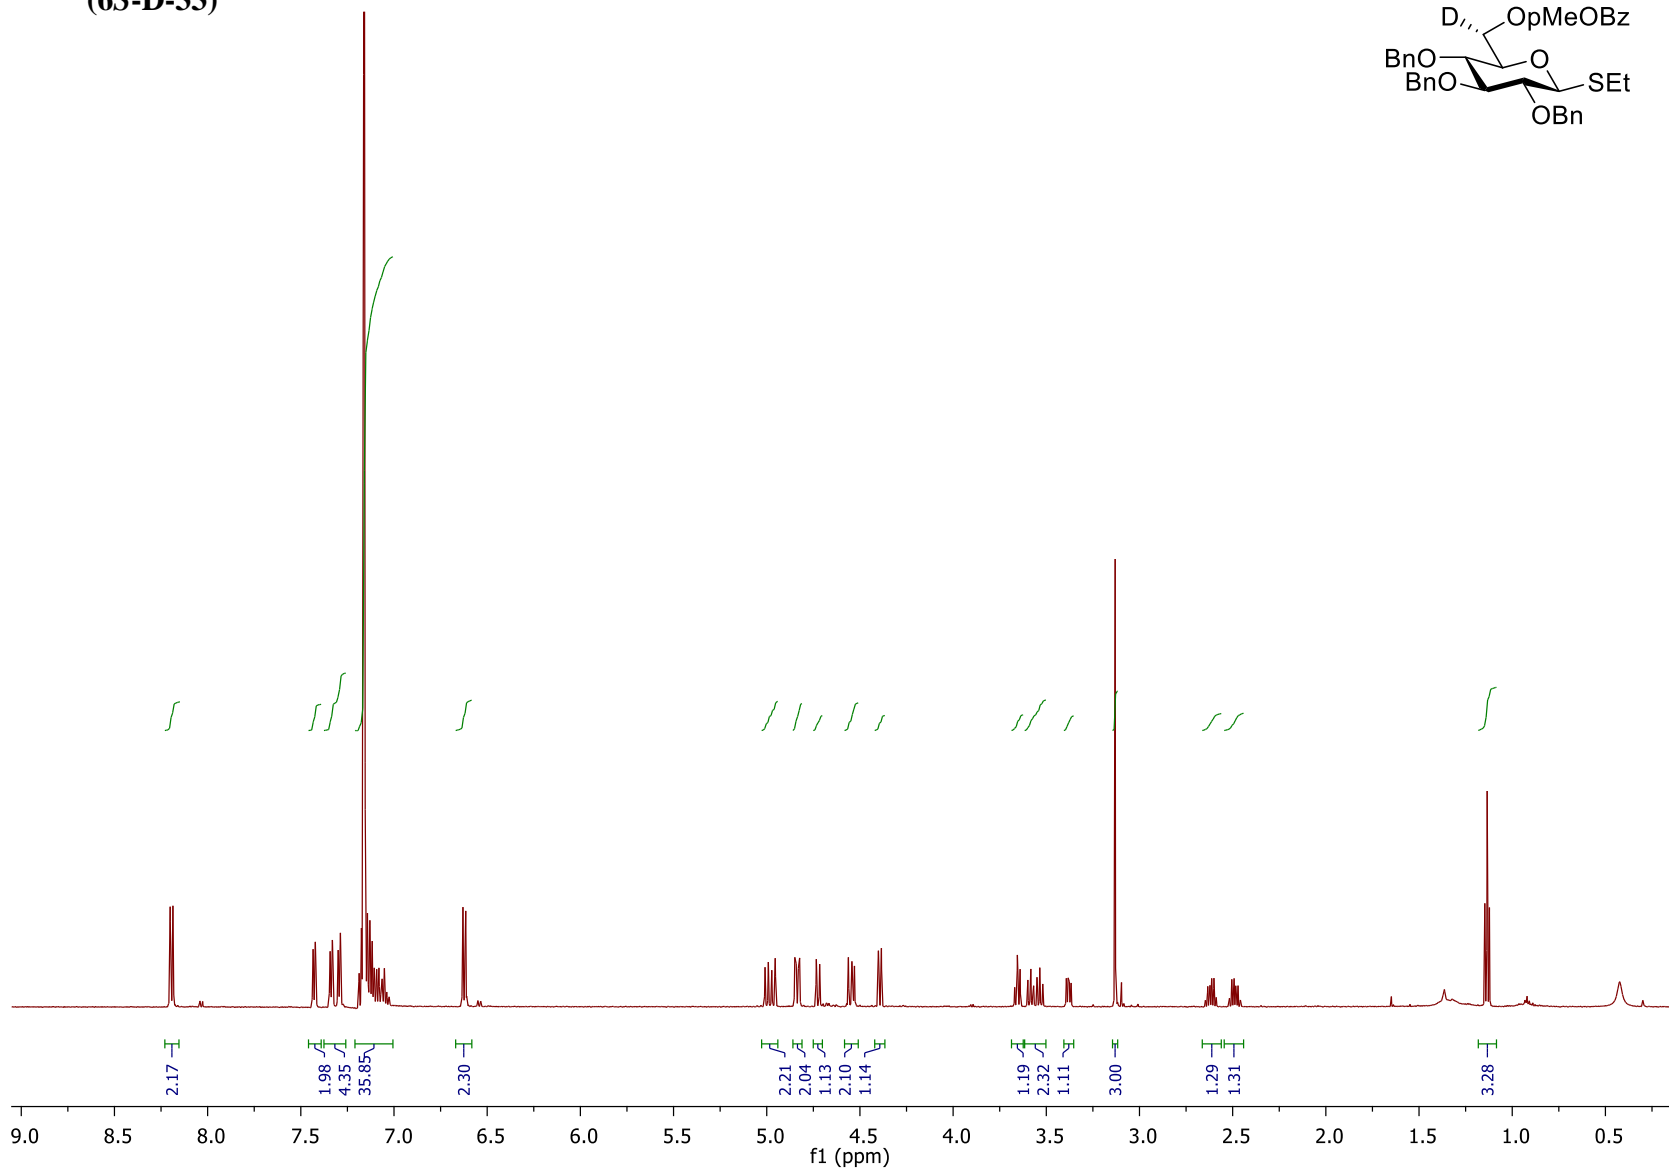

$^1\text{H}$  NMR (600 MHz,  $\text{CDCl}_3$ ) Spectrum of Ethyl 6-*O*-*p*-nitrobenzoyl-2,3,4-tri-*O*-benzyl-1-thio- $\beta$ -D-glucopyranoside (**34**)

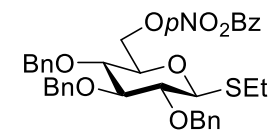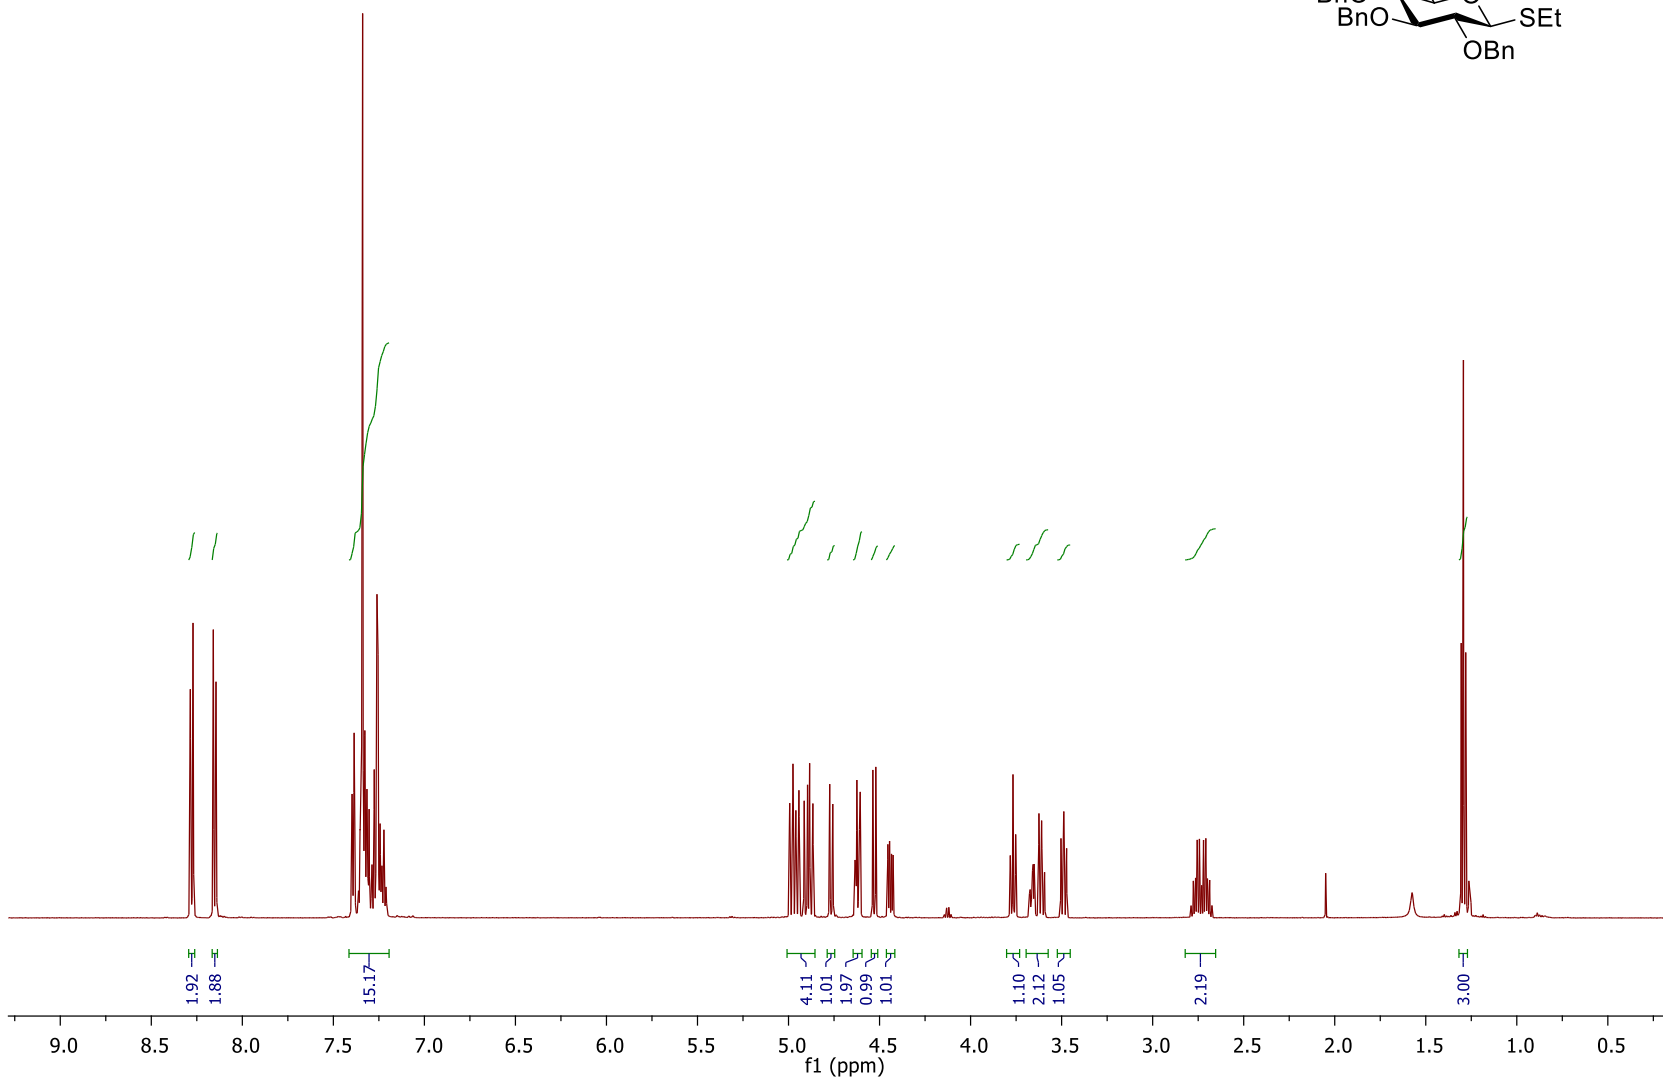



$^{13}\text{C}$  NMR (150 MHz,  $\text{CDCl}_3$ ) Spectrum of Ethyl 6-*O*-*p*-nitrobenzoyl-2,3,4-tri-*O*-benzyl-1-thio- $\beta$ -D-glucopyranoside (**34**)

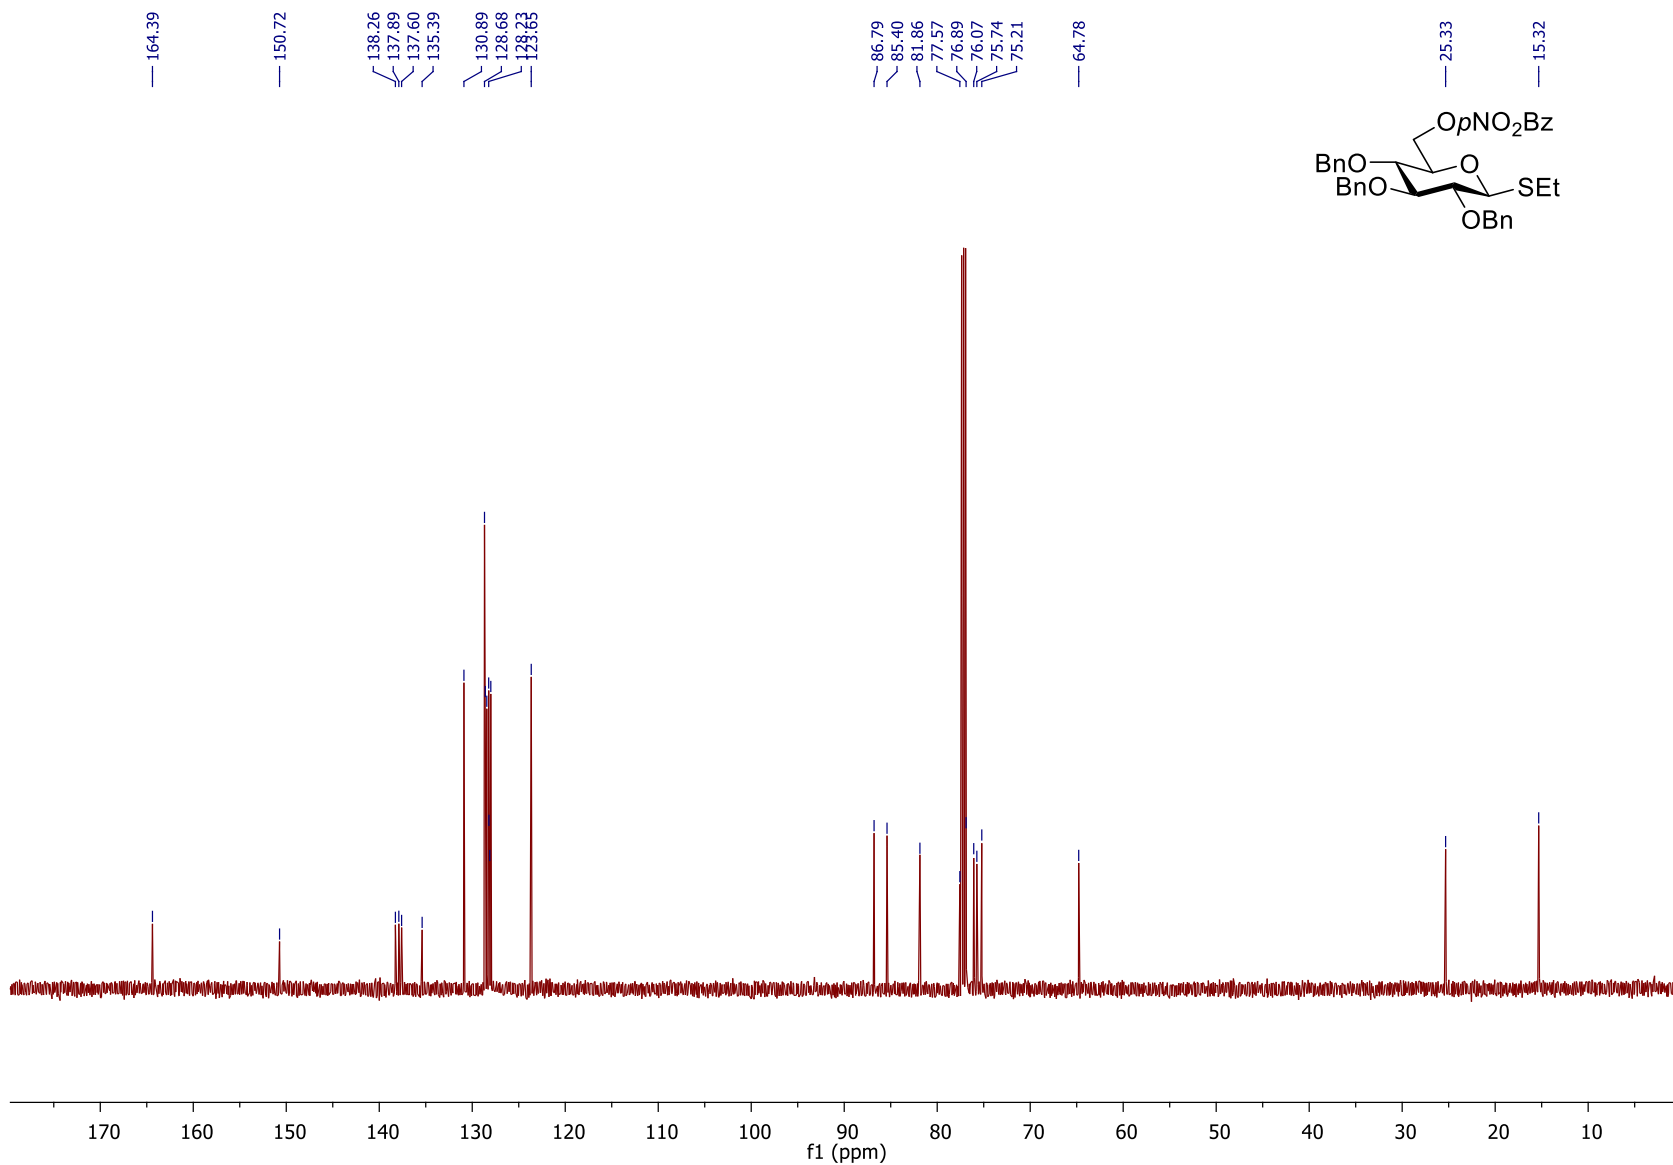

$^1\text{H}$  NMR (600 MHz,  $\text{C}_6\text{D}_6$ ) Spectrum of Ethyl 6-*O*-*p*-nitrobenzoyl-2,3,4-tri-*O*-benzyl-1-thio- $\beta$ -D-glucopyranoside (**34**)

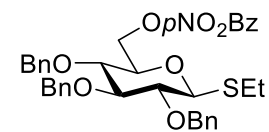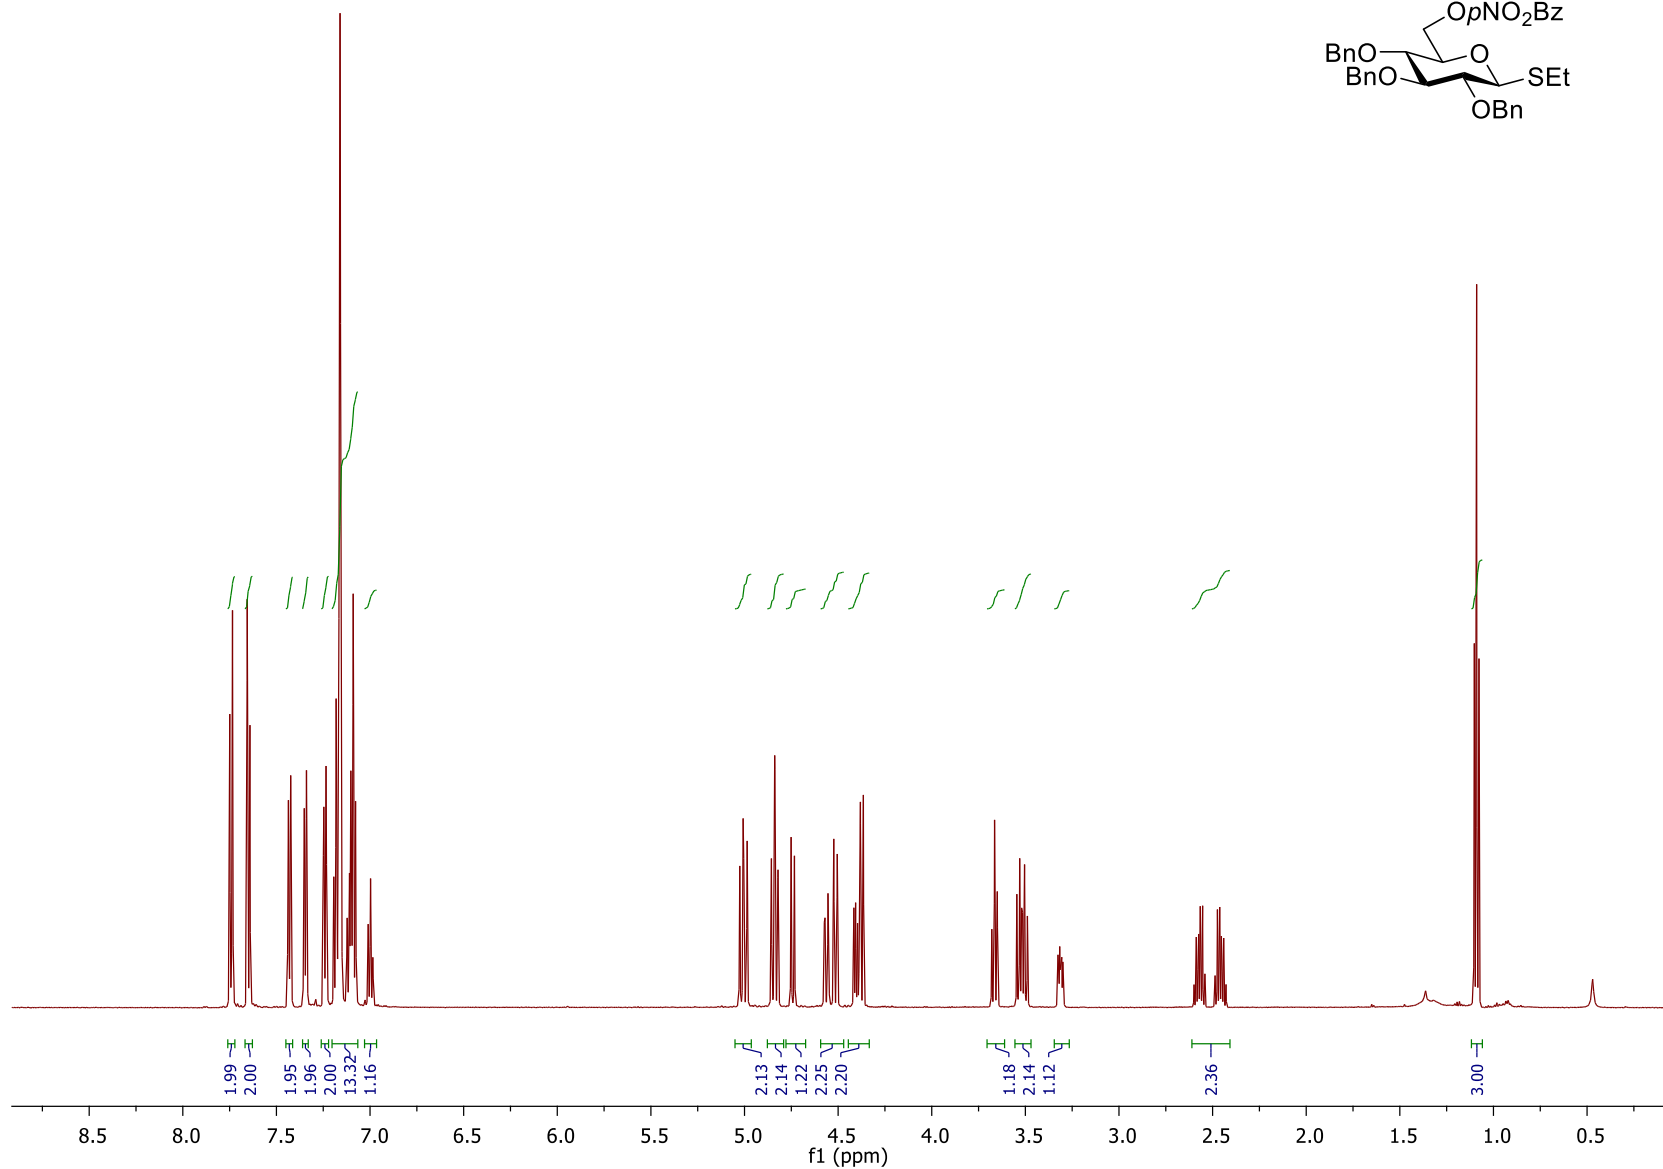

<sup>1</sup>H NMR (600 MHz, CDCl<sub>3</sub>) Spectrum of Ethyl (6*S*)-[6-<sup>2</sup>H<sub>1</sub>]-6-*O*-*p*-nitrobenzoyl-2,3,4-tri-*O*-benzyl-1-thio-βD-glucopyranoside (**6S-D-34**)

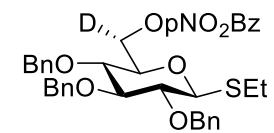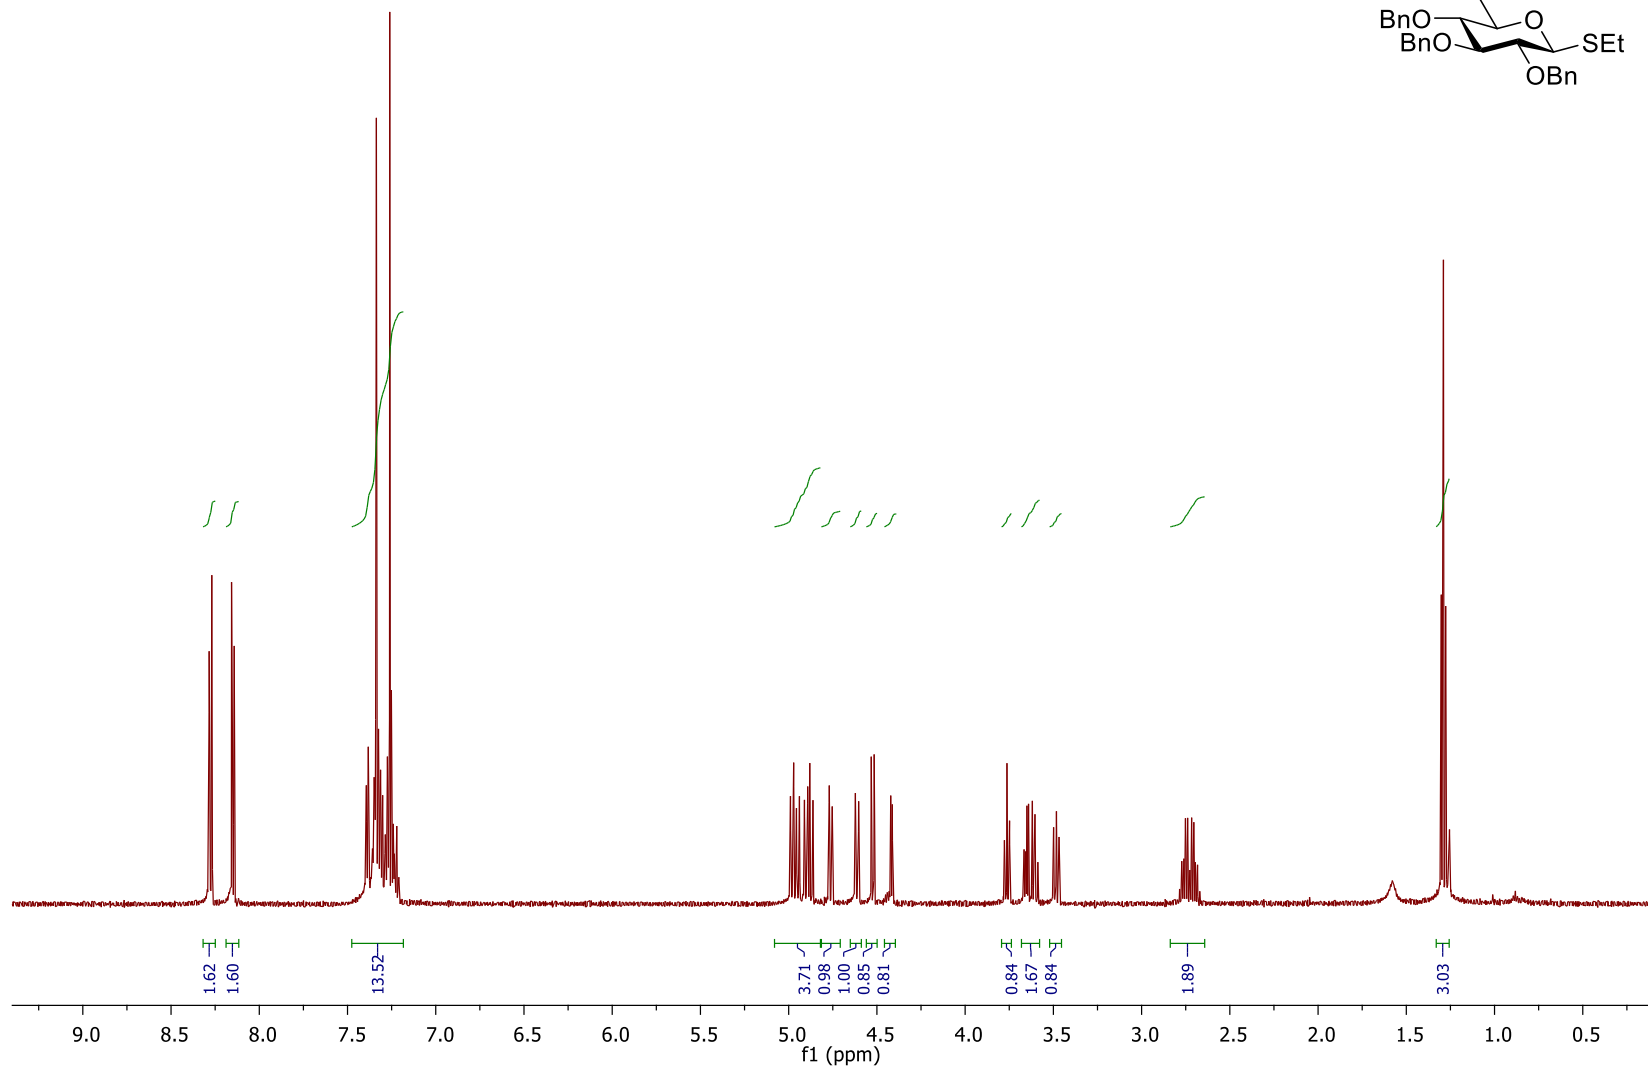

$^1\text{H}$  NMR (600 MHz,  $\text{C}_6\text{D}_6$ ) Spectrum of Ethyl (6*S*)-[6- $^2\text{H}_1$ ]-6-*O-p*-nitrobenzoyl-2,3,4-tri-*O*-benzyl-1-thio- $\beta$ -D-glucopyranoside (**6S-D-34**)

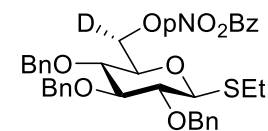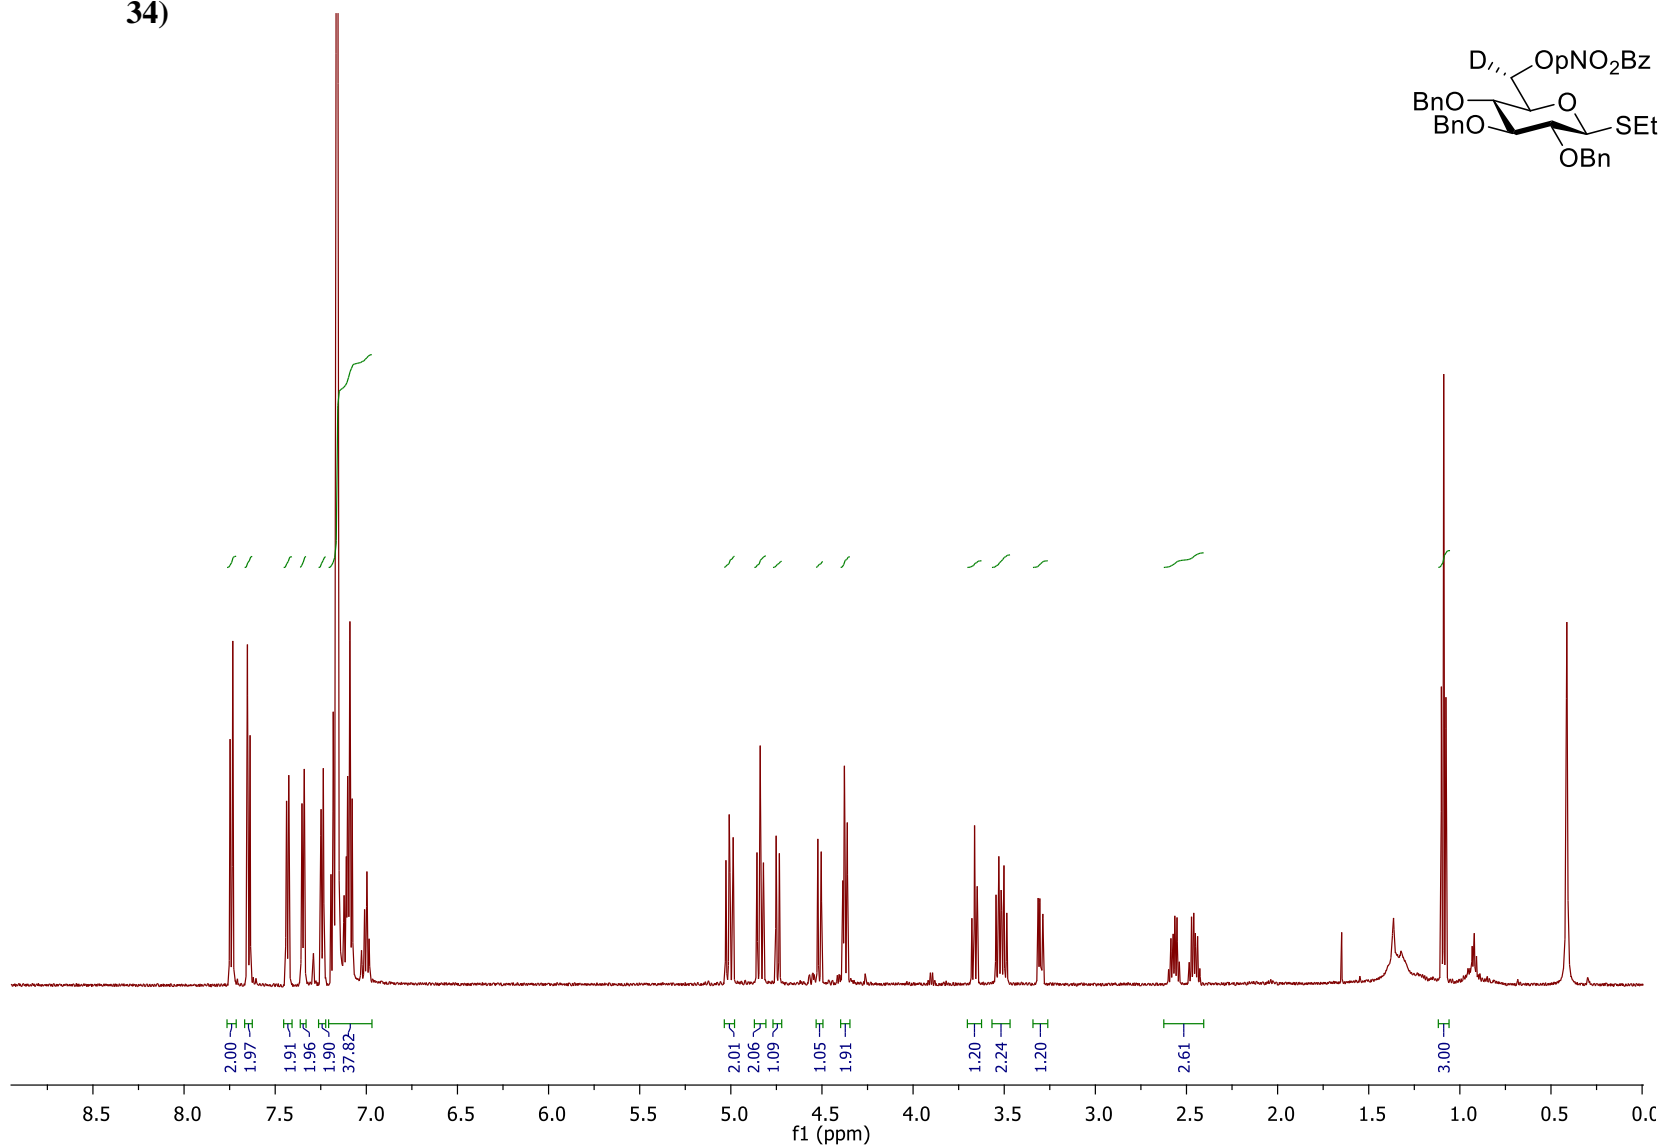

<sup>1</sup>H NMR (600 MHz, CDCl<sub>3</sub>) Spectrum of Ethyl 2,3,4-tri-*O*-benzyl-6-*O*-(*N*-phenylcarbamoyl)-1-thio-β-D-glucopyranoside (**35**)

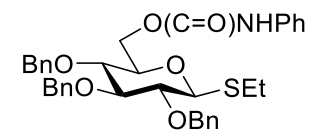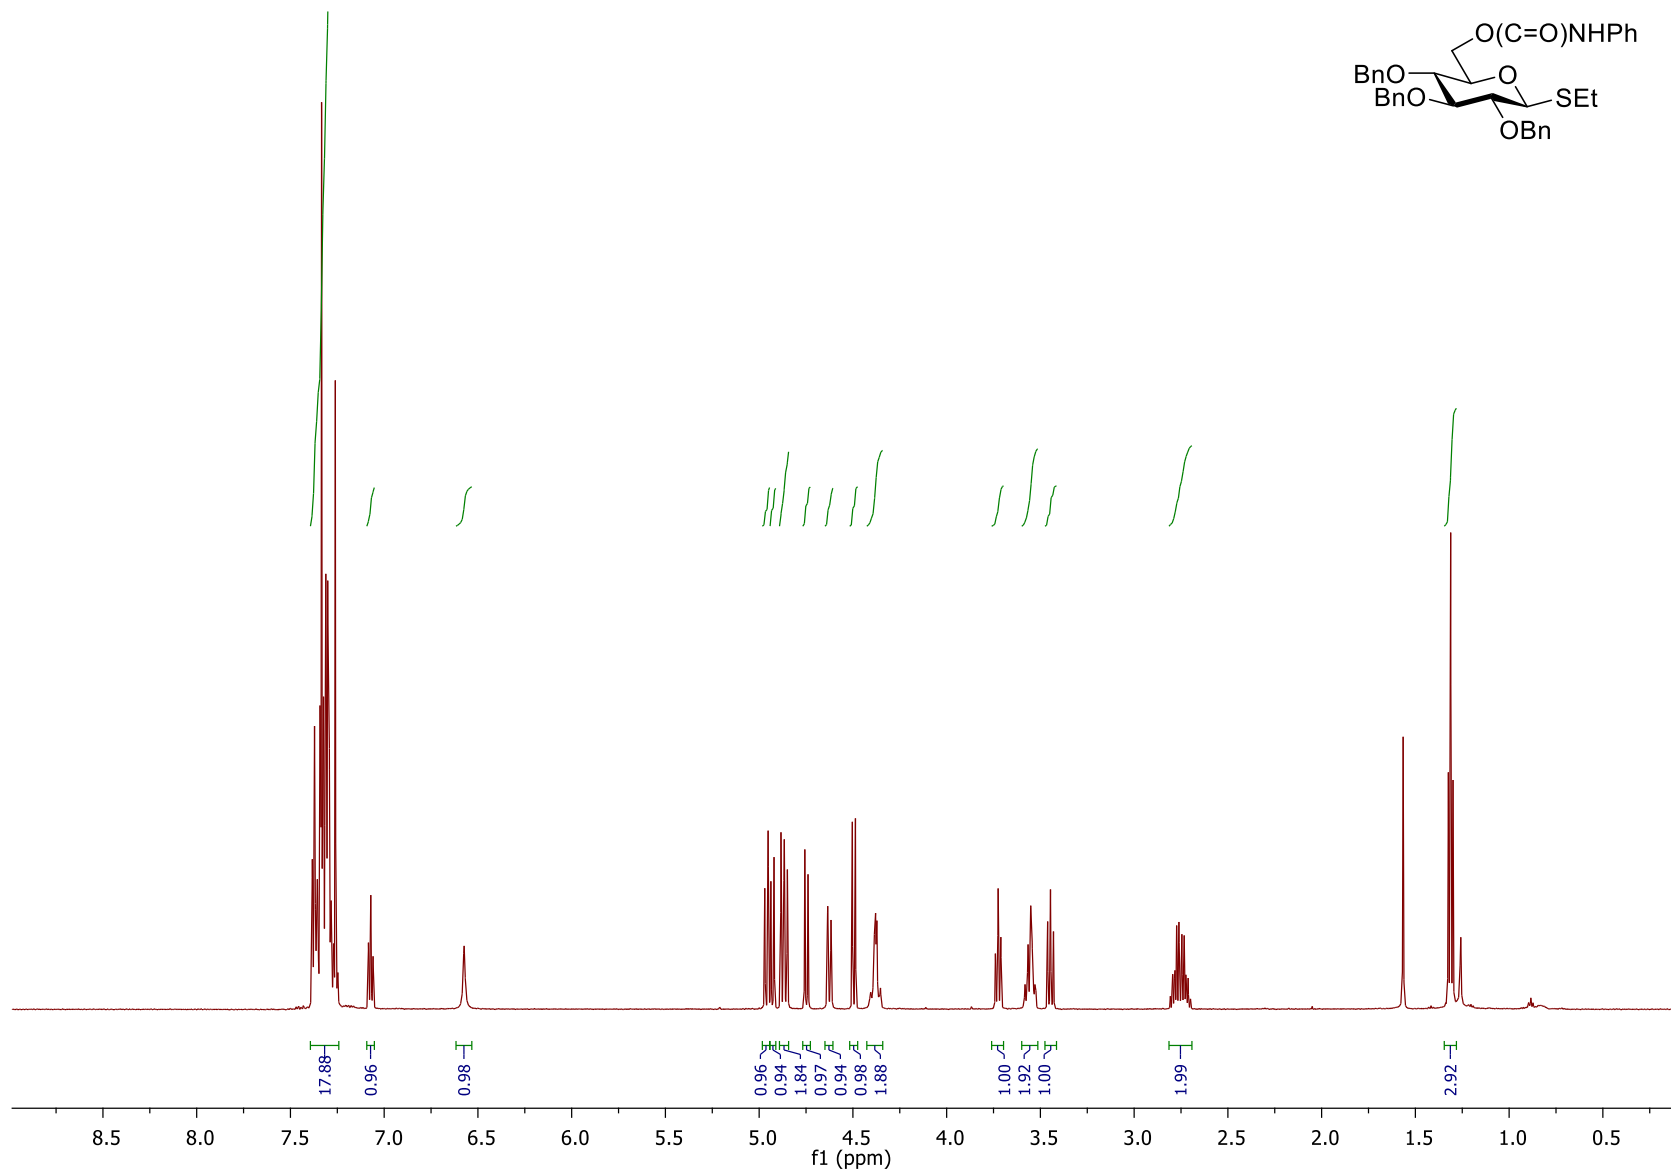

$^{13}\text{C}$  NMR (150 MHz,  $\text{CDCl}_3$ ) Spectrum of Ethyl 2,3,4-tri-*O*-benzyl-6-*O*-(*N*-phenylcarbamoyl)-1-thio- $\beta$ -D-glucopyranoside (**35**)

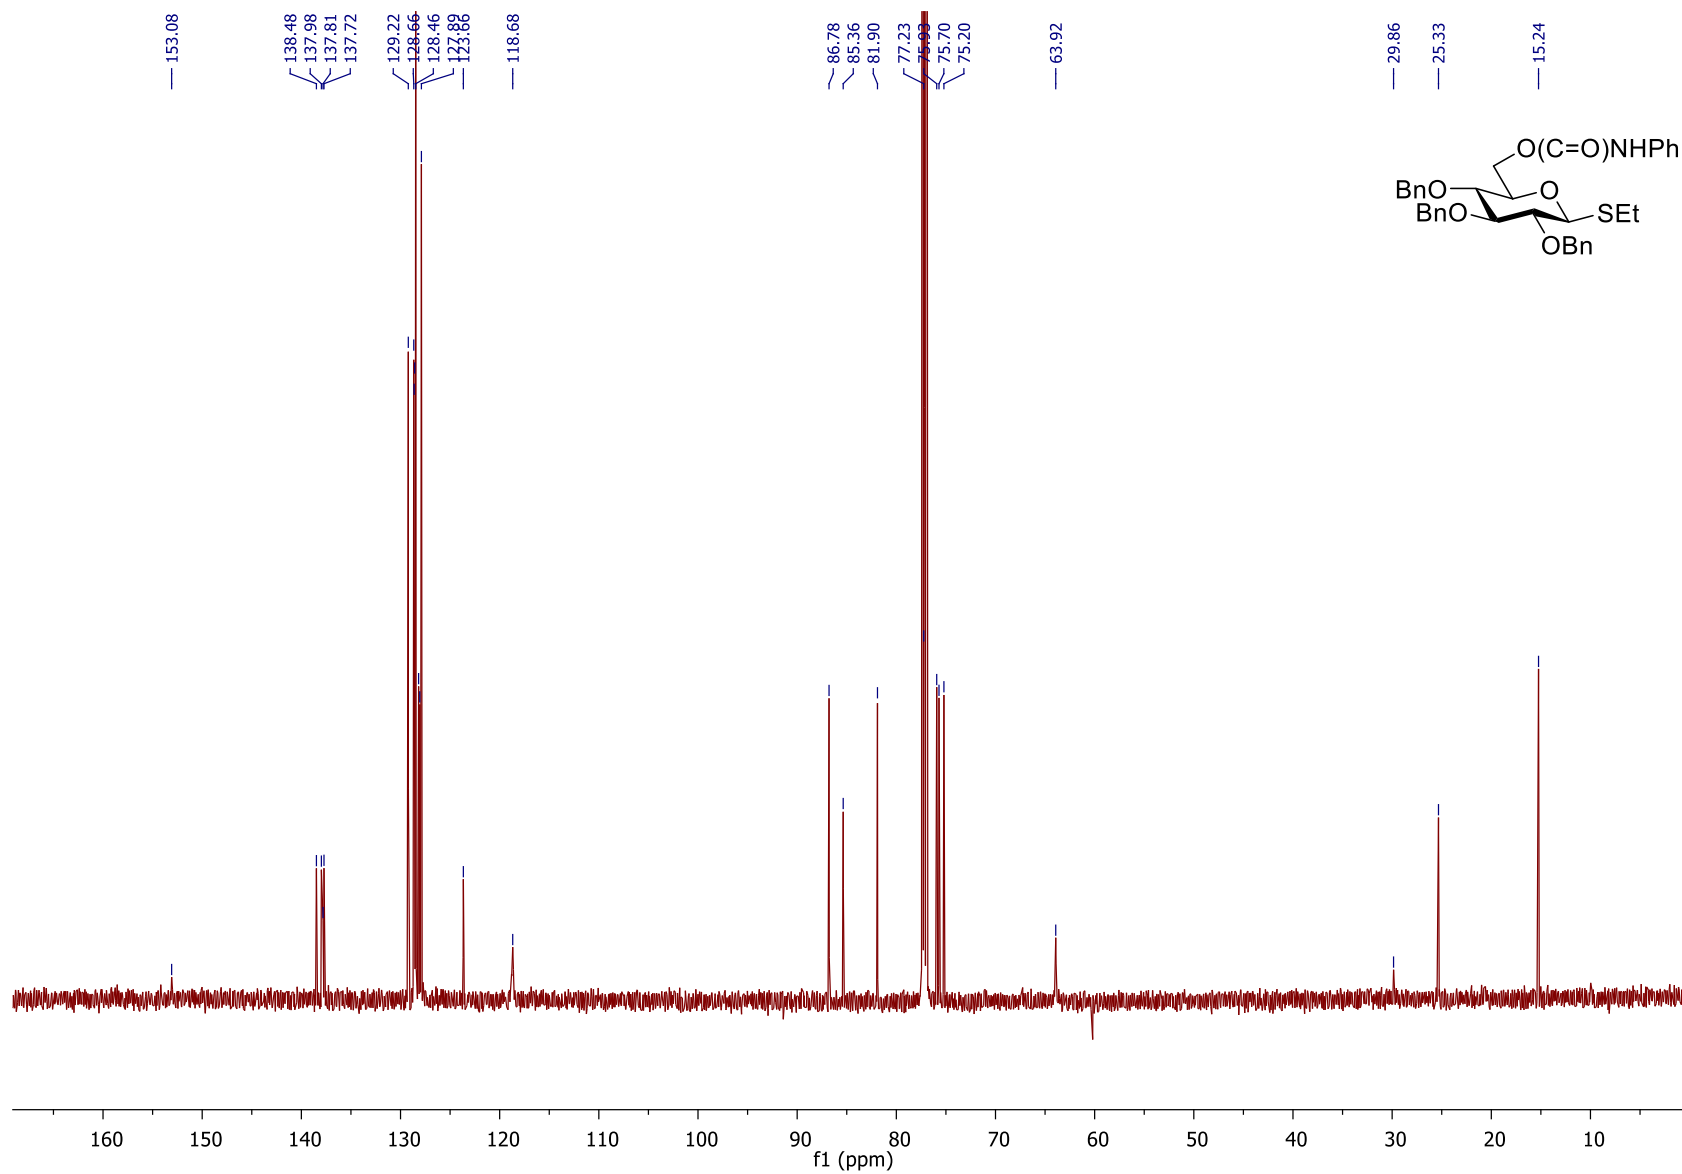

$^1\text{H}$  NMR (600 MHz,  $\text{C}_6\text{D}_6$ ) Spectrum of Ethyl 2,3,4-tri-*O*-benzyl-6-*O*-(*N*-phenylcarbamoyl)-1-thio- $\beta$ -D-glucopyranoside (**35**)

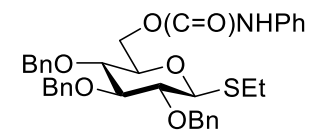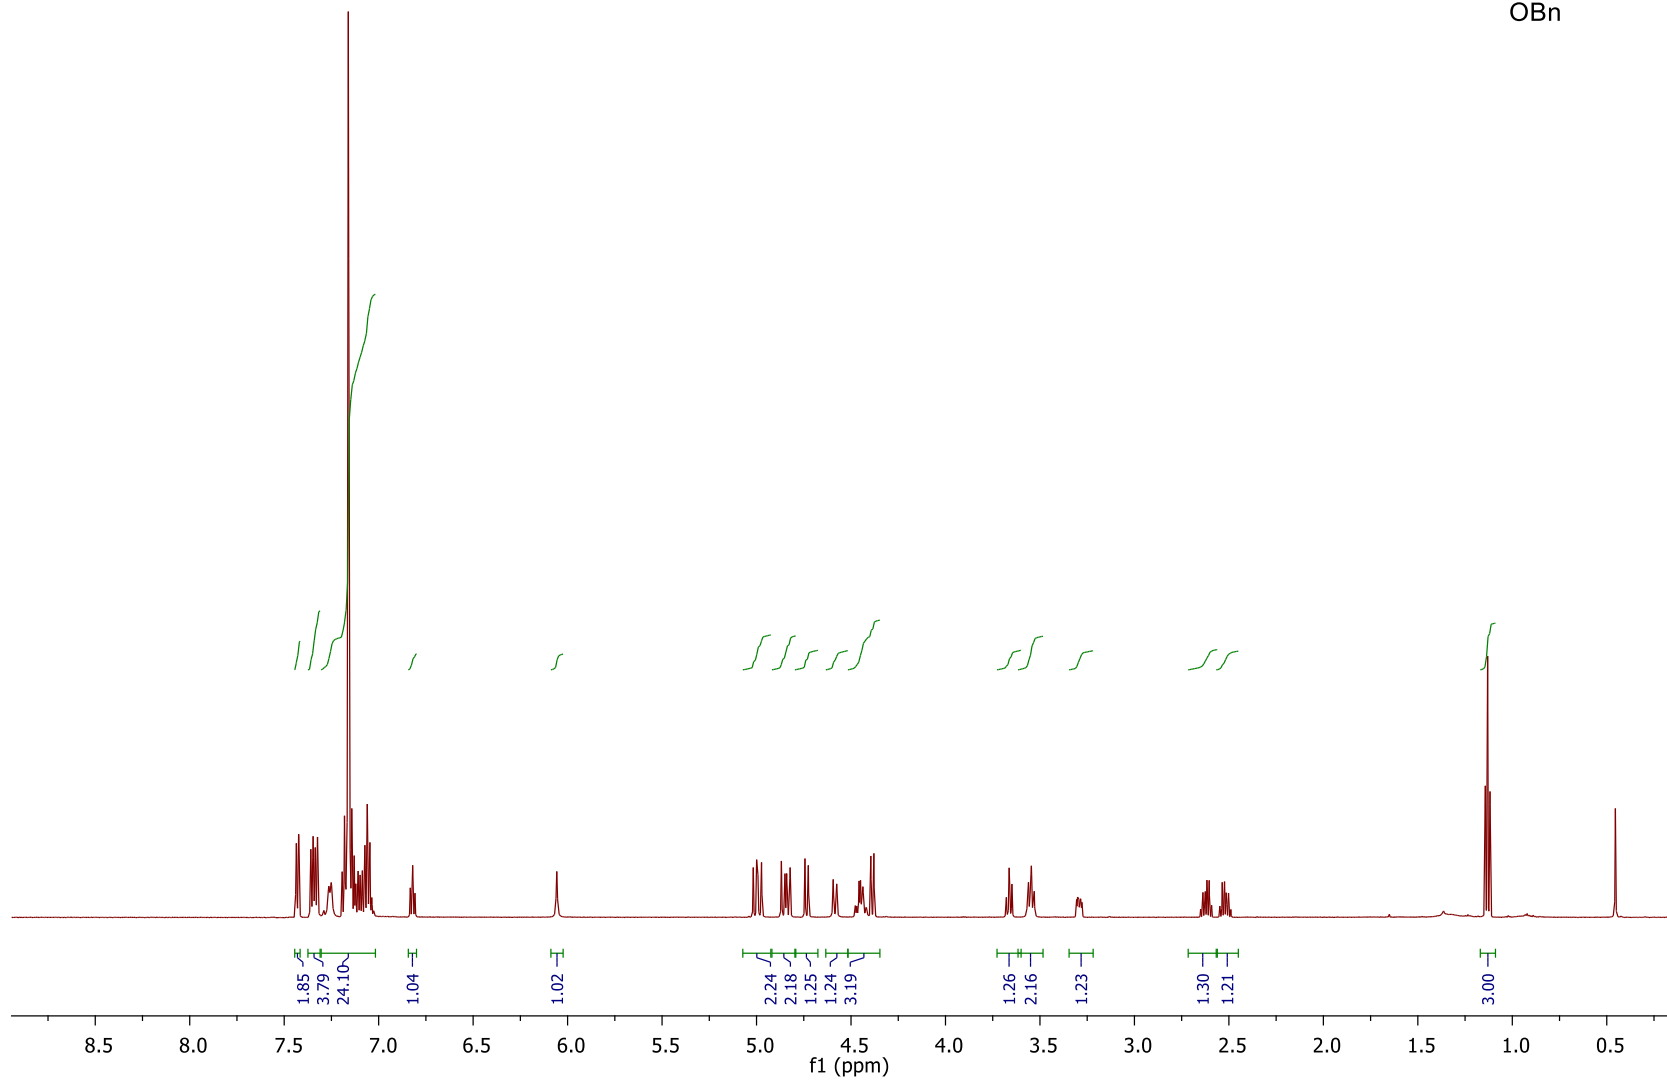

S127

$^1\text{H}$  NMR (600 MHz,  $\text{CDCl}_3$ ) Spectrum of Ethyl 2,3,4-tri-*O*-benzyl-(6*S*)-[6- $^2\text{H}_1$ ]-6-*O*-(*N*-phenylcarbamoyl)-1-thio- $\beta$ -D-glucopyranoside (**6S-D-35**)

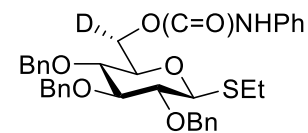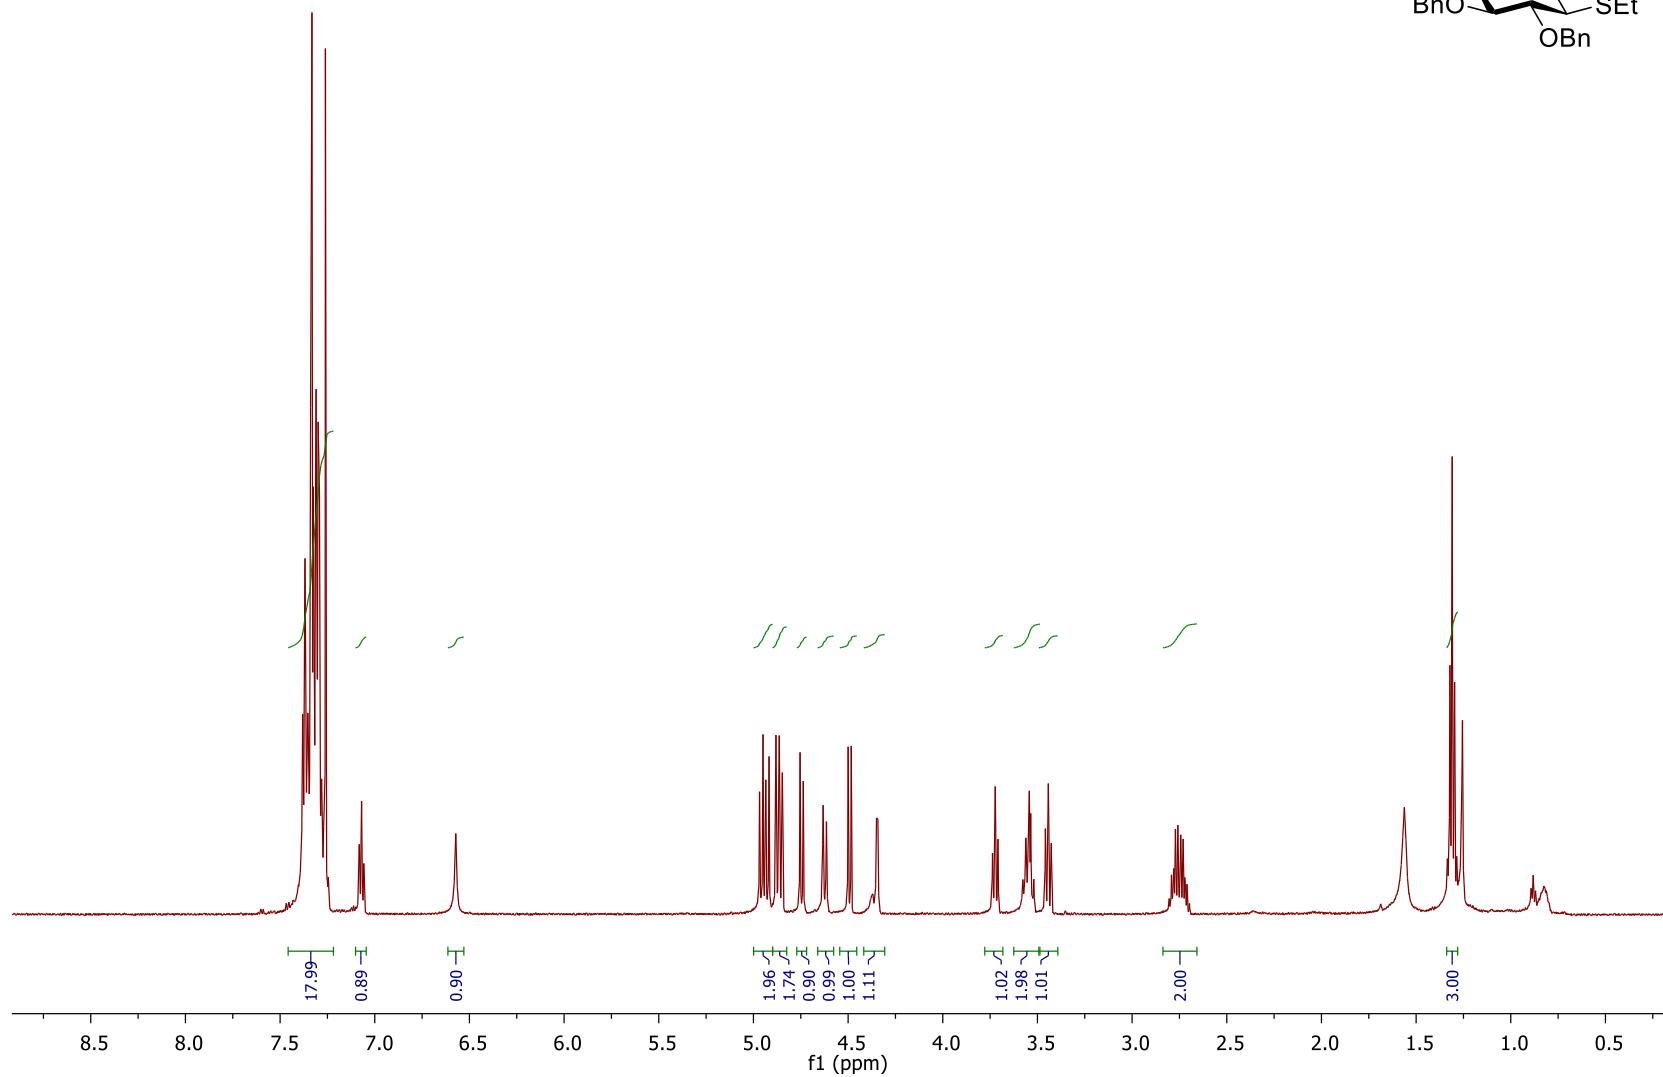



$^1\text{H}$  NMR (600 MHz,  $\text{C}_6\text{D}_6$ ) Spectrum of Ethyl 2,3,4-tri-*O*-benzyl-(6*S*)-[6- $^2\text{H}_1$ ]-6-*O*-(*N*-phenylcarbamoyl)-1-thio- $\beta$ -D-glucopyranoside (**6S-D-35**)

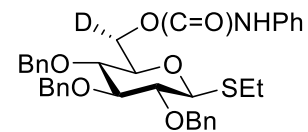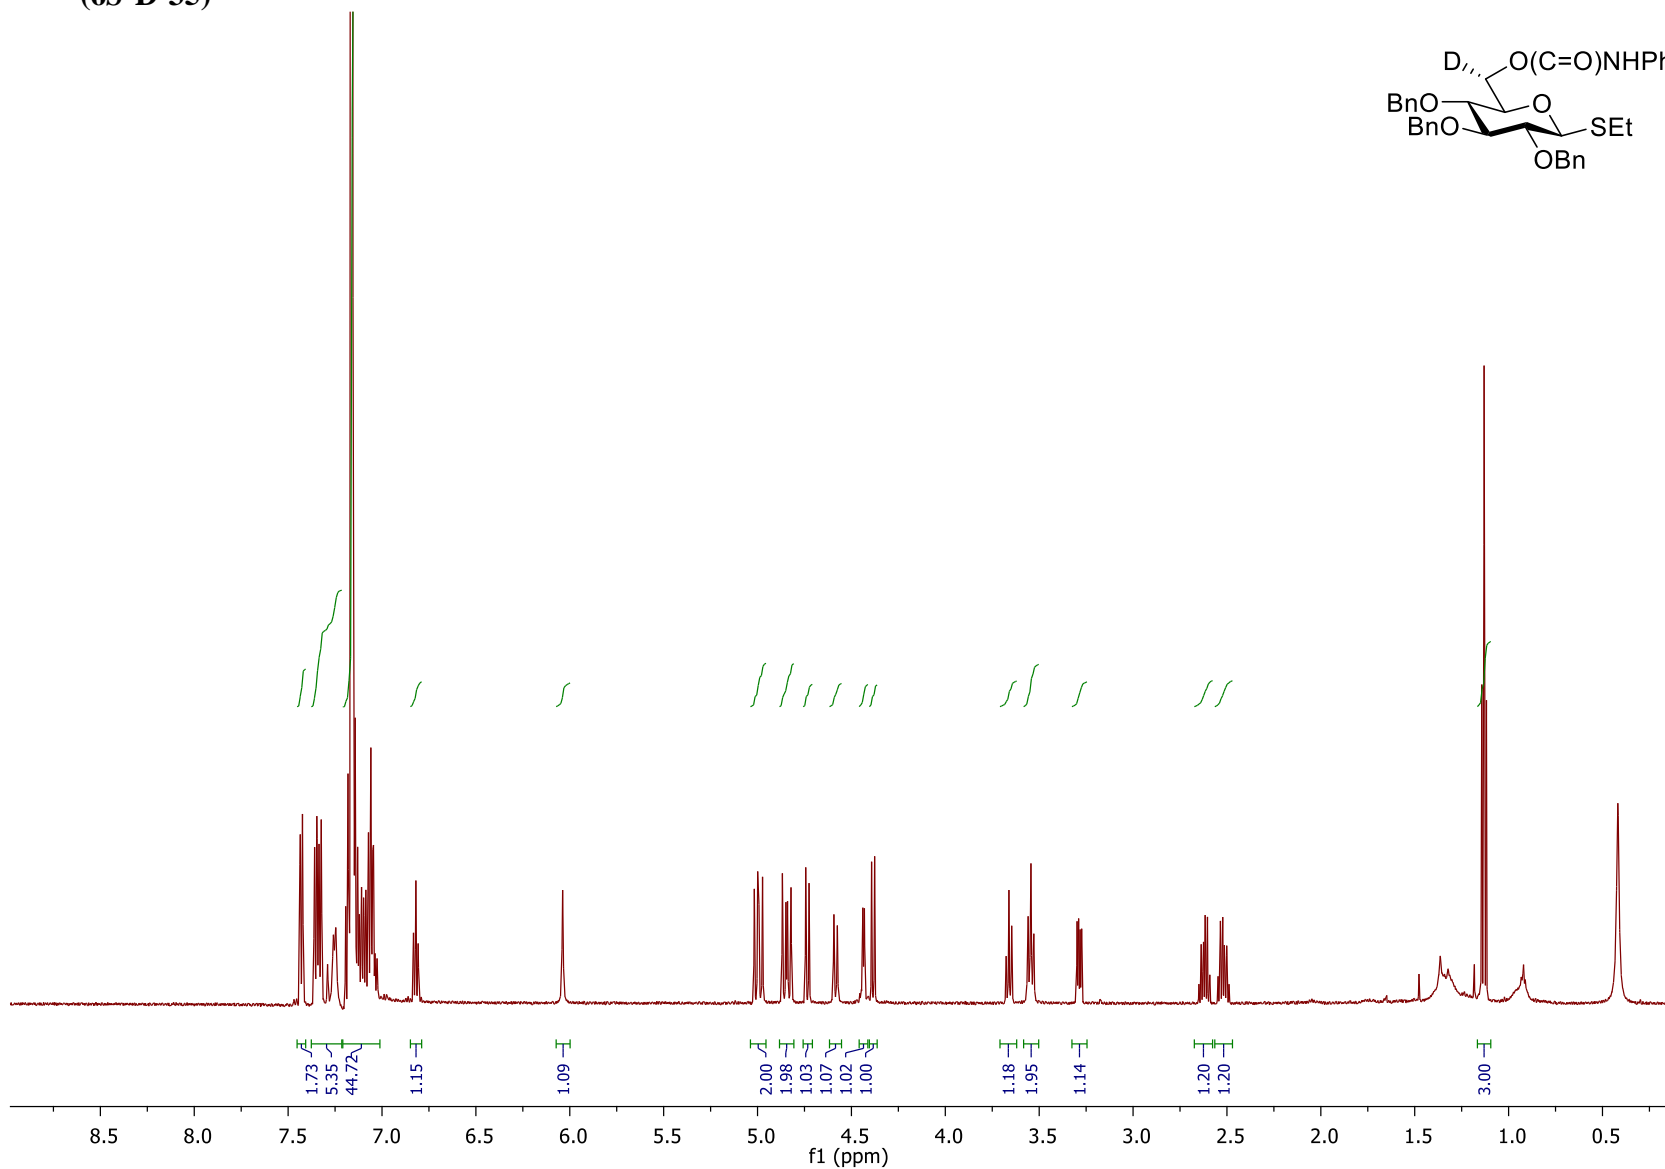

$^1\text{H}$  NMR (600 MHz,  $\text{CDCl}_3$ ) Spectrum of Ethyl 2,3,4,6-tetra-*O*-benzyl-1-thio- $\beta$ -D-glucopyranoside (**36**)

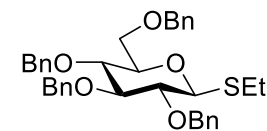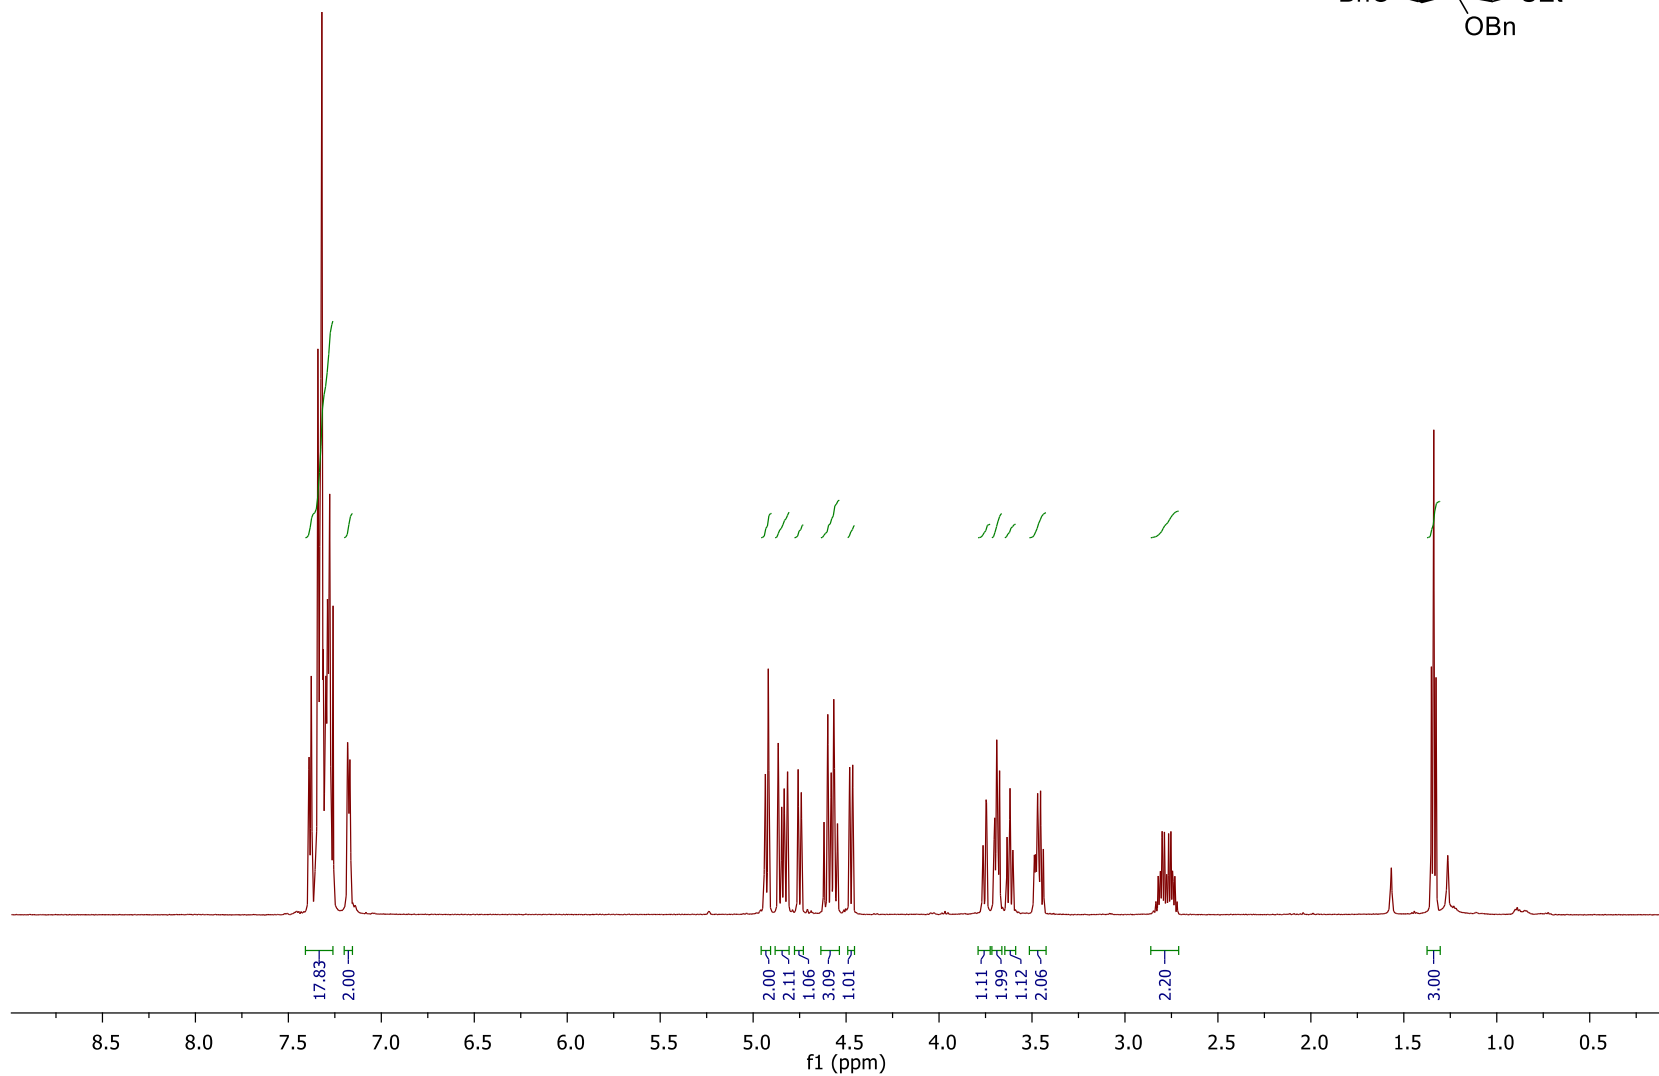

$^1\text{H}$  NMR (600 MHz,  $\text{C}_6\text{D}_6$ ) Spectrum of Ethyl 2,3,4,6-tetra-*O*-benzyl-1-thio- $\beta$ -D-glucopyranoside (**36**)

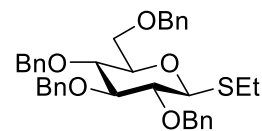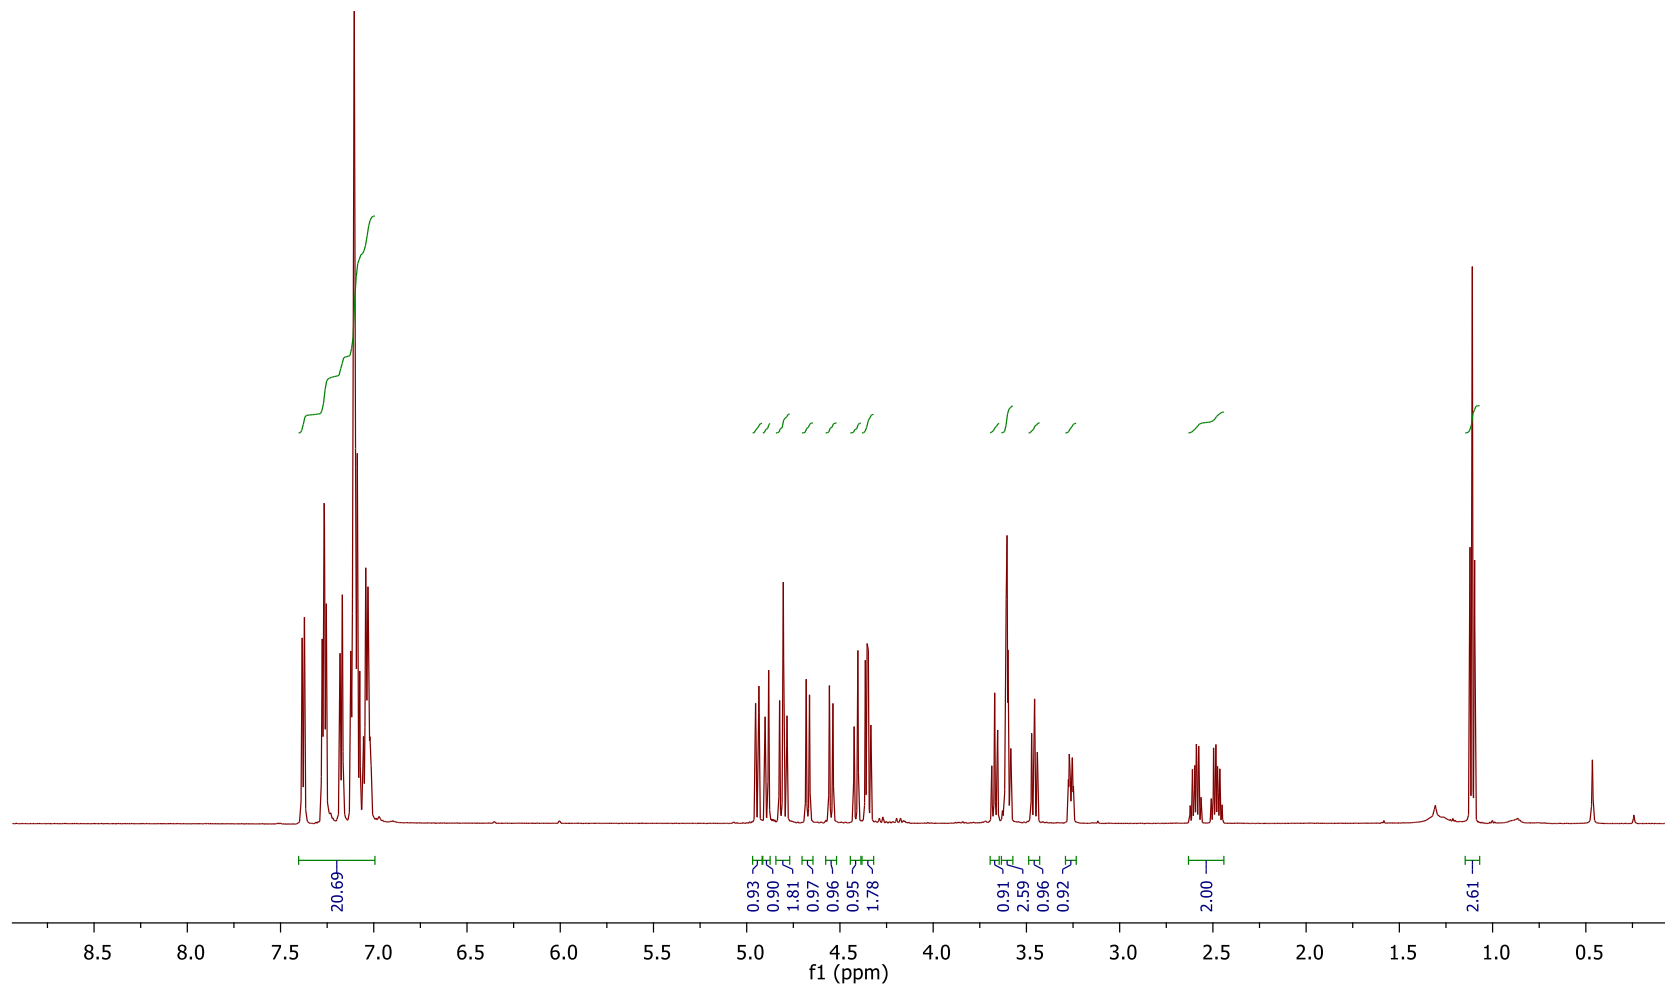

$^1\text{H}$  NMR (600 MHz,  $\text{CDCl}_3$ ) Spectrum of Ethyl (6*S*)-[6- $^2\text{H}_1$ ]-2,3,4,6-tetra-*O*-benzyl-1-thio- $\beta$ -D-glucopyranoside (**6*S*-D-36**)

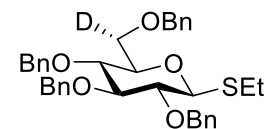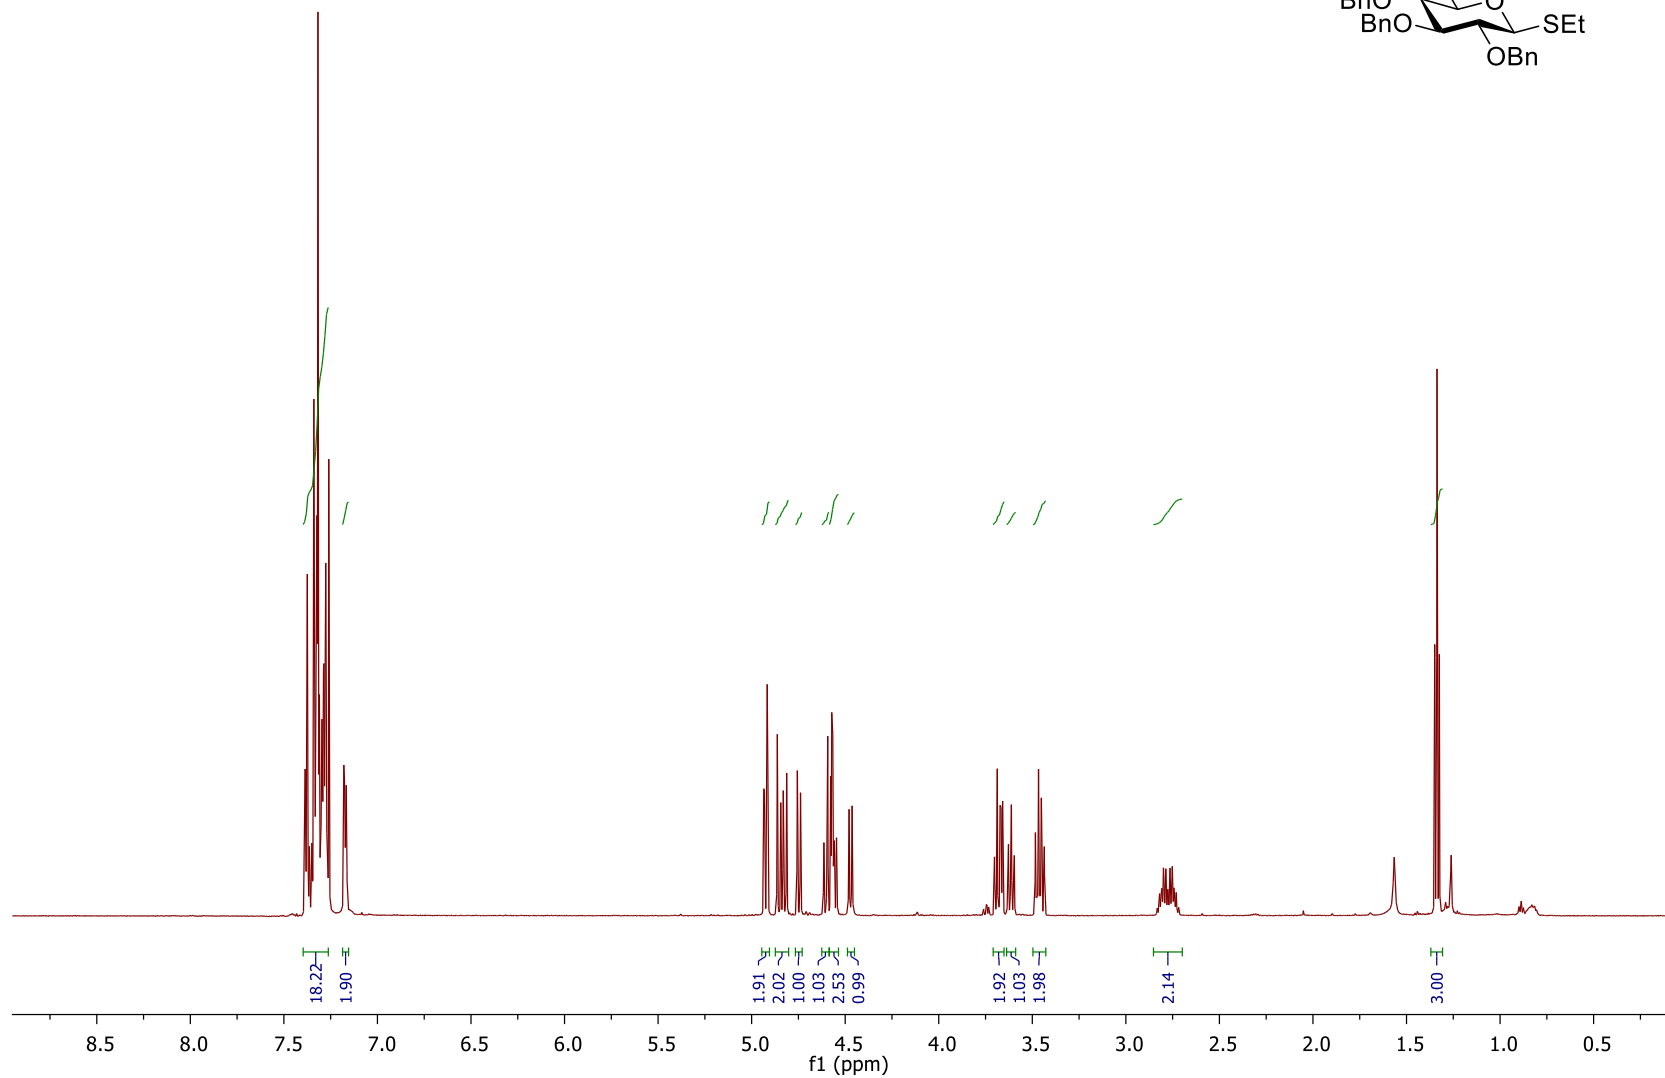

$^1\text{H}$  NMR (600 MHz,  $\text{C}_6\text{D}_6$ ) Spectrum of Ethyl (6*S*)-[6- $^2\text{H}_1$ ]-2,3,4,6-tetra-*O*-benzyl-1-thio- $\beta$ -D-glucopyranoside (**6*S*-D-36**)

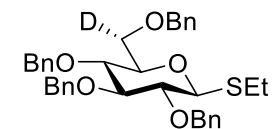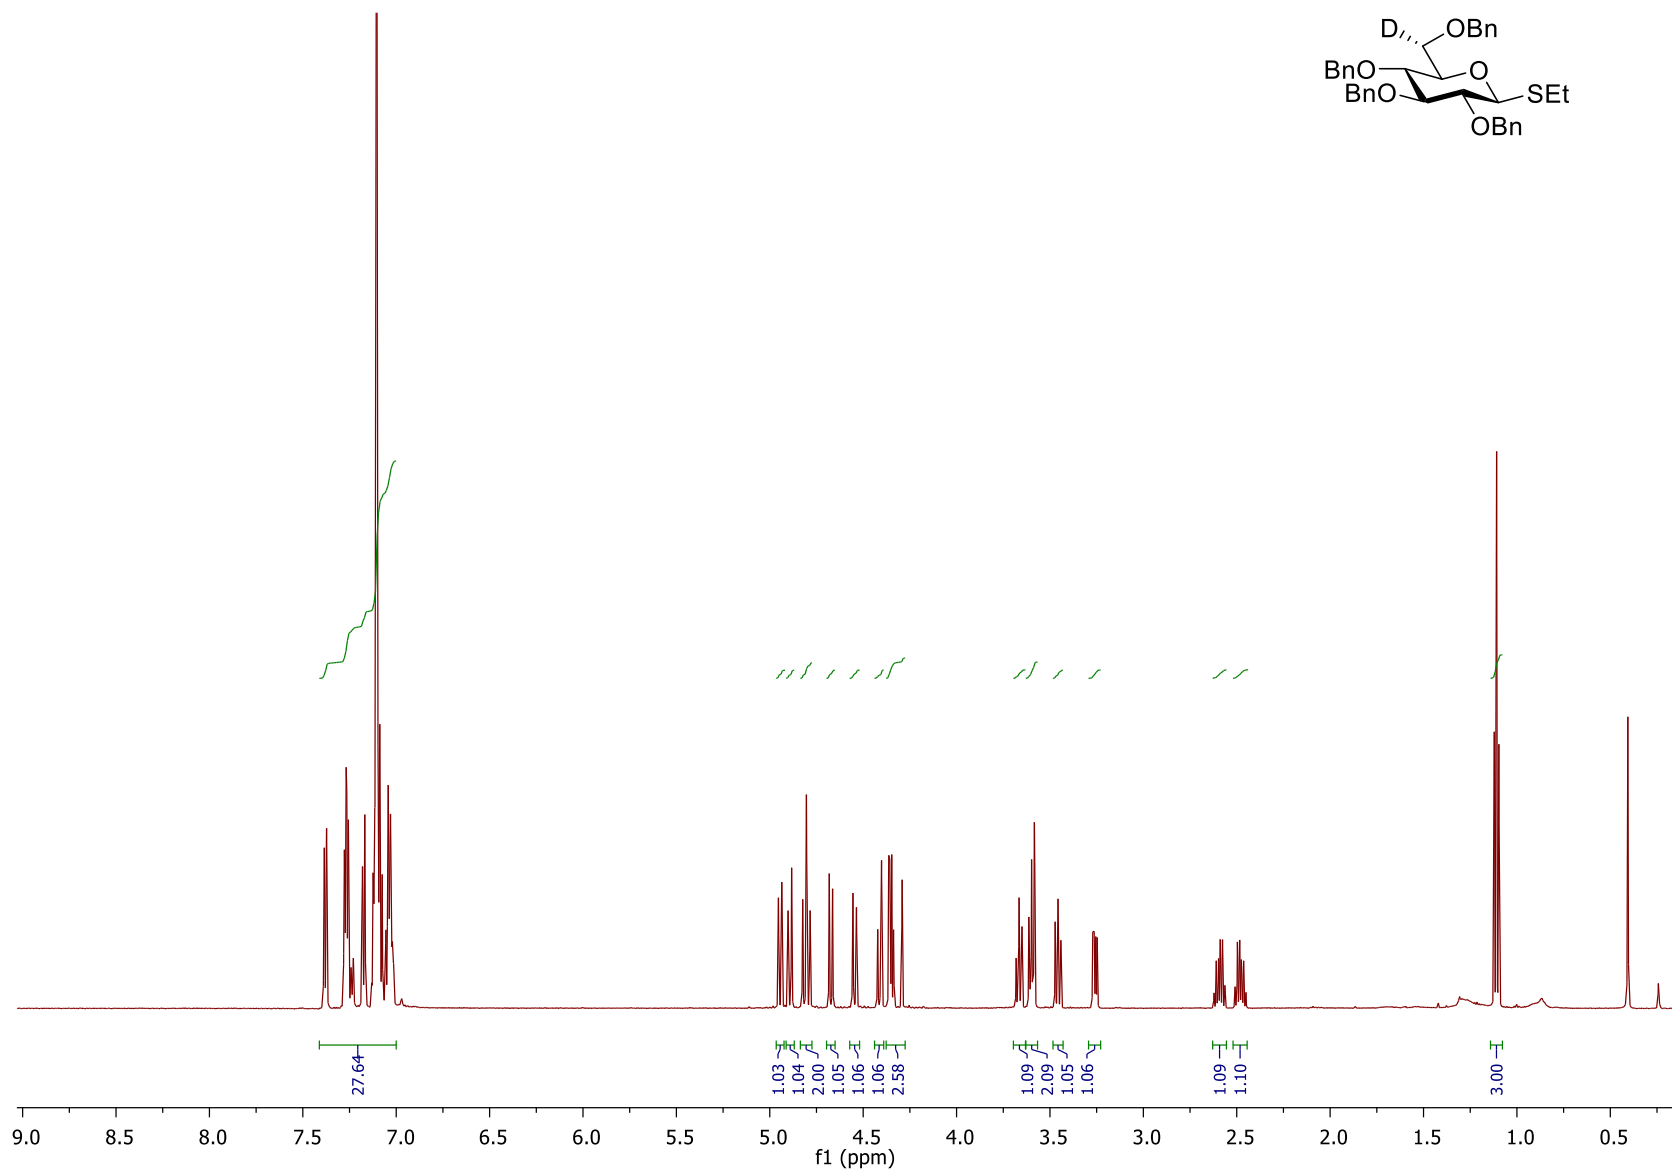

Supplement: jo8b01459_si_001.pdf [file jo8b01459_si_001.pdf]
